# Supplementary material for: Metal-freeS-arylation of 5-mercaptotetrazoles and 2-mercaptopyridine with unsymmetrical diaryliodonium salts
Source: Royal Society of Chemistry journal article supplement (doi:10.1039/d2ob00406b), 2022-01-01

## ***Supporting Information***

### **Metal-free S-arylation of 5-mercaptotetrazoles and 2-mercaptopyridine with Unsymmetrical Diaryliodonium Salts**

Raktim Abha Saikia,<sup>a</sup> Nitumoni Hazarika,<sup>b</sup> Nishant Biswakarma,<sup>a</sup> Ramesh Chandra Deka<sup>a</sup>  
and Ashim Jyoti Thakur\*<sup>a</sup>

<sup>a</sup>Department of Chemical Sciences, Tezpur University, Napaam-784028, India.

<sup>b</sup>Department of Chemistry, Indian Institute of Technology Guwahati, North Guwahati-781039, India.

\*E-mail: [ashim@tezu.ernet.in](mailto:ashim@tezu.ernet.in)

## CONTENTS:

|                                                                   | <b>Page nos.</b> |
|-------------------------------------------------------------------|------------------|
| 1. General experimental information                               | 1                |
| 2. Synthesis of tetrazole-5-thiols                                | 2                |
| 3. Synthesis of diaryliodonium salts                              | 2-7              |
| 4. Investigation on the <i>S</i> -Arylation of tetrazole-5-thiols | 7-10             |
| 5. Investigation on the <i>S</i> -Arylation of 2-mercaptopyridine | 10-12            |
| 6. General procedure                                              | 13               |
| 7. DFT studies                                                    | 13-24            |
| 8. Analytical data                                                | 25-45            |
| 9. References                                                     | 45-46            |
| 10. Copies of $^1\text{H}$ and $^{13}\text{C}$ NMR spectra        | 47-140           |

## 1. GENERAL EXPERIMENTAL INFORMATION

All reactions were performed in oven-dried Schlenk-tubes or round bottom flasks under ambient conditions, unless otherwise is stated. Dichloromethane (DCM), 1,2-dichloroethane (DCE) and acetonitrile (ACN) were dried by refluxing over CaH<sub>2</sub> under nitrogen condition and stored over 4Å molecular sieves. Toluene and 1,4-dioxane were dried utilising conventional drying procedures using sodium/benzophenone as indicator and stored over 4Å molecular sieves. All chemicals were purchased from commercial suppliers and used as received unless otherwise is stated. NaOH, Cs<sub>2</sub>CO<sub>3</sub>, K<sub>3</sub>PO<sub>4</sub> and <sup>t</sup>BuOK were stored in a desiccator. The diaryliodonium salts were synthesized according to procedures described below. *M*-CPBA (Aldrich, 77% active oxidant) was dried at room temperature over high vacuum for 1 hour and titrated by iodometric titration<sup>1</sup> prior to use in the synthesis of diaryliodonium salts. Thin Layer Chromatography (TLC) analyses were performed on pre-coated Merck silica gel 60F<sub>254</sub> plates using UV (254 nm) light and/or with KMnO<sub>4</sub>-stain. Column chromatography was performed on 100-200 mesh silica gel using the gradient system, freshly distilled ethyl acetate-hexane mixture. All NMR data were recorded in a 400 MHz instrument at 298 K using CDCl<sub>3</sub> and DMSO-*d*<sub>6</sub> as solvents. Chemical shifts are given in ppm relative to the residual solvent peak (<sup>1</sup>H NMR: CDCl<sub>3</sub> δ 7.26 and sometimes δ 1.56 (CDCl<sub>3</sub>-water) and in DMSO-*d*<sub>6</sub> δ 2.50 and δ 3.3 (DMSO-water); <sup>13</sup>C NMR: CDCl<sub>3</sub> δ 77.16, DMSO-*d*<sub>6</sub> δ 39.52) with multiplicity (br=broad, s=singlet, d=doublet, t=triplet, q=quartet, quin=quintet, sex=sextet, sep=septet, m=multiplet, app=apparent), coupling constants (in Hz) and integration. Chemical shifts for <sup>19</sup>F-NMR are given in ppm relative to monofluorobenzene (-113.15 ppm) used as internal standard. The raw NMR data were processed by MestReNova software.

## 2. SYNTHESIS OF TETRAZOLE-5-THIOL

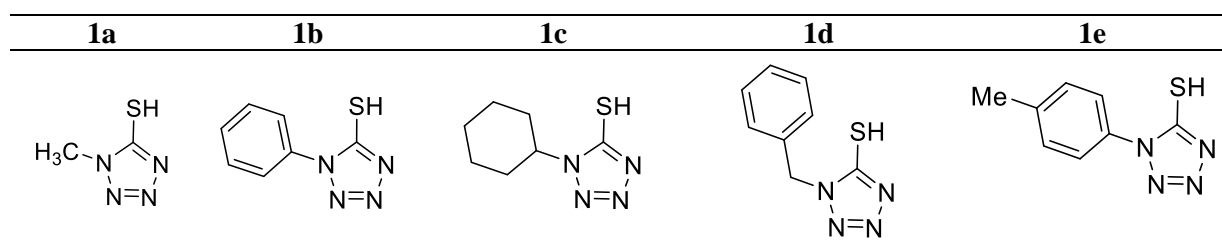

1-methyl-1*H*-tetrazole-5-thiol (**1a**) is commercially available but, other tetrazole-5-thiols (**1b-1e**) are known compounds and were prepared by literature procedures.<sup>2,3</sup>

### 2.1. General procedure for the alkyl/aryl isothiocyanate and its corresponding tetrazole-5-thiol:

#### Scheme S1:

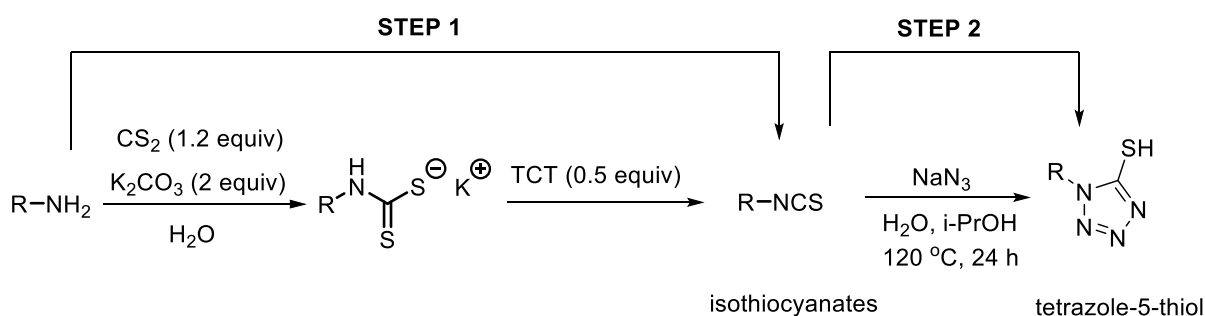

Step 1<sup>2</sup>: To a mixture of amine (20 mmol) and  $K_2CO_3$  (5.52 g, 40 mmol) in 20 mL of water, 1.82 g of  $CS_2$  (24 mmol) was added drop-wise in a period of 20–30 min at room temperature (rt). After the addition was complete, the mixture was stirred for several hours until complete conversion was determined by TLC. Then, the reaction mixture was cooled to 0 °C and a solution of 1.85 g of 2,4,6-trichloro-1,3,5-triazine (TCT) (10 mmol) in 15 mL of  $CH_2Cl_2$  was added dropwise. After the addition was complete, the mixture was stirred for another 0.5 h to finish the reaction. The reaction mixture was then basified to pH >11 with 6N NaOH to obtain a clear solution. The organic layer was separated and the aqueous phase was extracted with  $CH_2Cl_2$  (2×10 mL). The combined organic layers were dried over anhydrous  $Na_2SO_4$ , filtered and the solvent was removed under reduced pressure. The residual was purified by chromatography through a short silica column using petroleum ether as eluent to obtain the isothiocyanates.

Step 2<sup>3</sup>: To a solution of  $NaN_3$  (2.5 mmol) and  $H_2O$  (3 mL) was added a solution of isothiocyanate (5 mmol) in *i*-PrOH (2 mL) at 120 °C using oil bath and the resulting mixture was refluxed for 24 h. The mixture was treated with conc. HCl (1 mL) at 0 °C and then extracted twice with ethyl acetate (10 mL and 5 mL). The combined extracts were washed with brine, dried ( $MgSO_4$ ), and concentrated to crude product. Further, the crude product was purified by column chromatography to get the pure product.

### 3. SYNTHESIS OF DIARYLIODONIUM SALTS

#### 3.1 Various methods for diaryliodonium salts possessing different counter-anions

Most of the diaryliodonium salts used in this project were synthesized according to one-pot reported procedure. These reactions were run without precautions to avoid air or moisture.

#### Olofsson's protocol:

##### Method I<sup>4</sup>

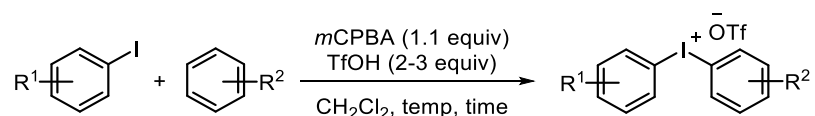

##### Method II<sup>4</sup>

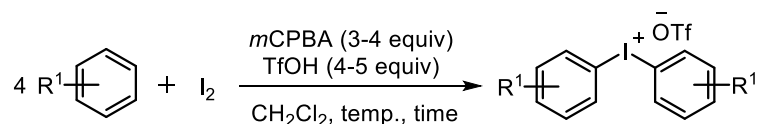

##### Method III<sup>5</sup>

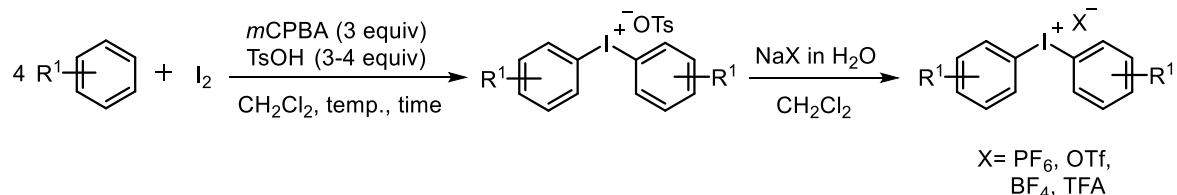

##### Method IV<sup>6</sup>

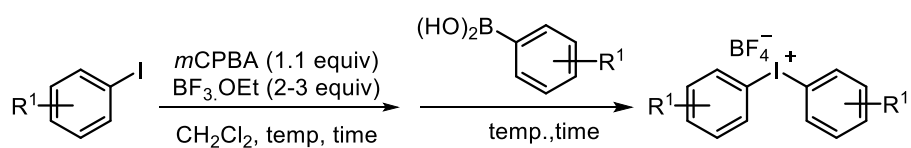

##### Method V<sup>7</sup>

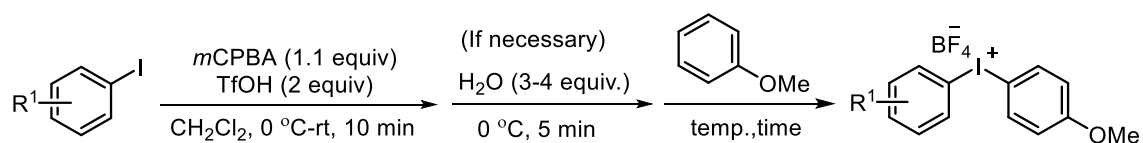

**Gaunt's modified protocol:**Method VI<sup>8</sup>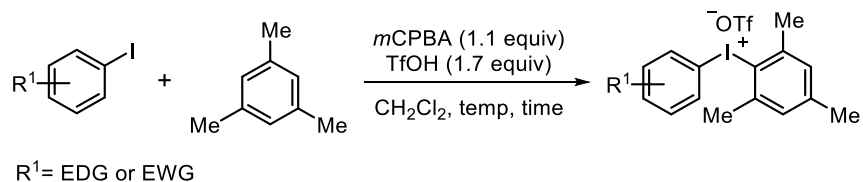**Stuart's protocol:**Method VII<sup>9</sup>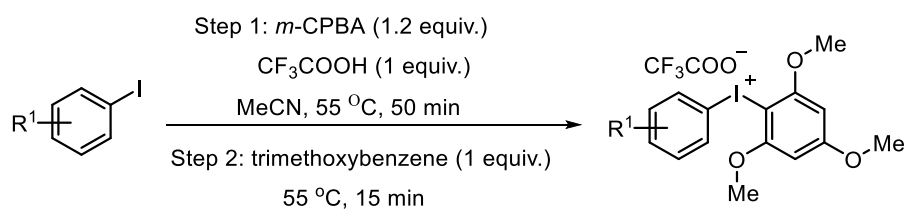Method VIII<sup>10</sup>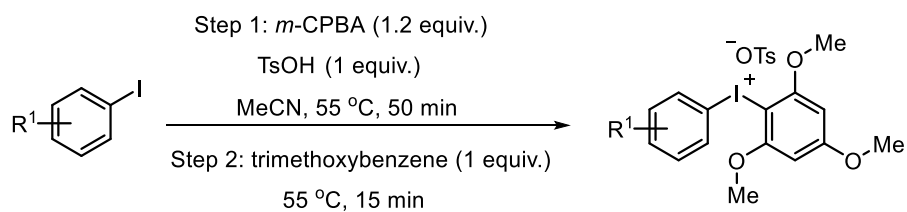

### 3.2 Diaryliodonium salts synthesized in this work

**Table S1.** Synthesis of various diaryliodonium salts according to above mentioned procedures:

|            |                                                                                                                                                                                                                                                                                                                                                                                                                                                                                                                                                                                                                                                                                                                                                                                                                                                                                                                                                                                                                                                                                                                                                                                                                                                                            |
|------------|----------------------------------------------------------------------------------------------------------------------------------------------------------------------------------------------------------------------------------------------------------------------------------------------------------------------------------------------------------------------------------------------------------------------------------------------------------------------------------------------------------------------------------------------------------------------------------------------------------------------------------------------------------------------------------------------------------------------------------------------------------------------------------------------------------------------------------------------------------------------------------------------------------------------------------------------------------------------------------------------------------------------------------------------------------------------------------------------------------------------------------------------------------------------------------------------------------------------------------------------------------------------------|
| Method I   | <div style="display: flex; justify-content: space-around; align-items: center;"> <div style="text-align: center;"> 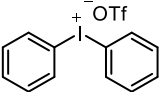 <p><b>2a-OTf</b></p> </div> <div style="text-align: center;">  <p><b>2b-OTf</b></p> </div> <div style="text-align: center;">  <p><b>2c-OTf</b></p> </div> </div> <div style="display: flex; justify-content: space-around; align-items: center; margin-top: 20px;"> <div style="text-align: center;">  <p><b>2d-OTf</b></p> </div> <div style="text-align: center;">  <p><b>2e-OTf</b></p> </div> <div style="text-align: center;">  <p><b>2f-OTf</b></p> </div> </div> <div style="text-align: center; margin-top: 20px;">  <p><b>2g-OTf</b></p> </div> |
| Method II  | <div style="text-align: center;">  <p><b>2g-OTf</b></p> </div>                                                                                                                                                                                                                                                                                                                                                                                                                                                                                                                                                                                                                                                                                                                                                                                                                                                                                                                                                                                                                                                                                                                          |
| Method III | <div style="text-align: center;">  <p><b>2i-An</b></p> </div>                                                                                                                                                                                                                                                                                                                                                                                                                                                                                                                                                                                                                                                                                                                                                                                                                                                                                                                                                                                                                                                                                                                          |
| Method IV  | <div style="text-align: center;">  <p><b>2a-BF<sub>4</sub></b></p> </div>                                                                                                                                                                                                                                                                                                                                                                                                                                                                                                                                                                                                                                                                                                                                                                                                                                                                                                                                                                                                                                                                                                               |
| Method VI  | <div style="text-align: center;">  <p><b>2a-Mes</b></p> </div>                                                                                                                                                                                                                                                                                                                                                                                                                                                                                                                                                                                                                                                                                                                                                                                                                                                                                                                                                                                                                                                                                                                          |

Method  
VII:  
Prepared  
Aryl-TMP-  
iodonium-  
trifluoroac-  
etate

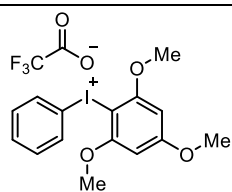**2a-TMP**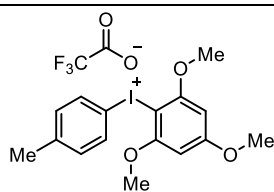**2b-TMP**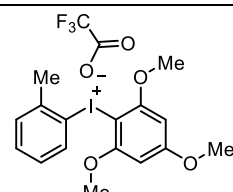**2c-TMP**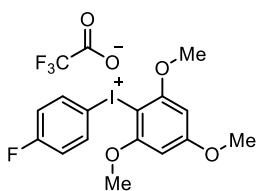**2d-TMP**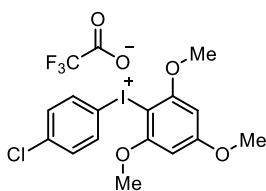**2e-TMP**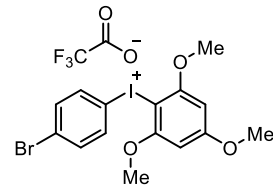**2f-TMP**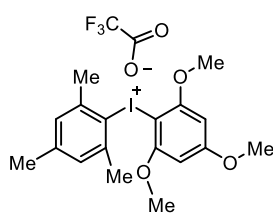**2g-TMP**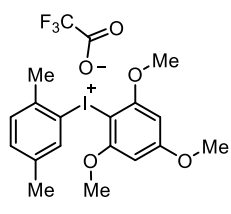**2h-TMP**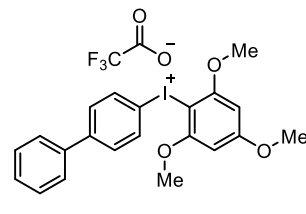**2i-TMP**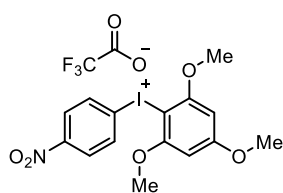**2j-TMP**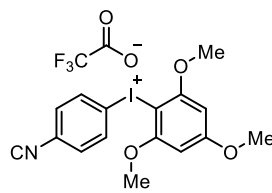**2k-TMP**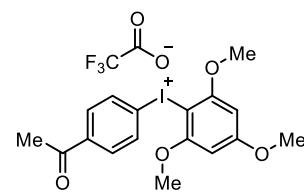**2l-TMP**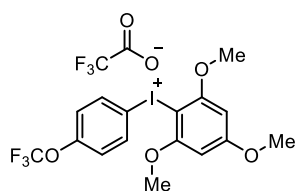**2m-TMP**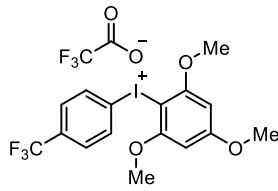**2n-TMP**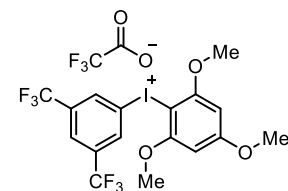**2o-TMP**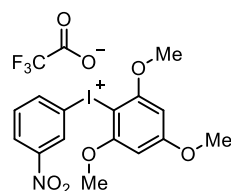**2p-TMP**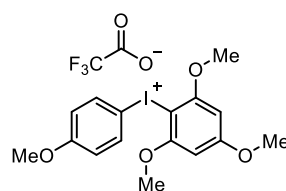**2q-TMP**



Method V:  
Prepared Aryl-  
anisyl-iodonium-  
trifluorosulfonate

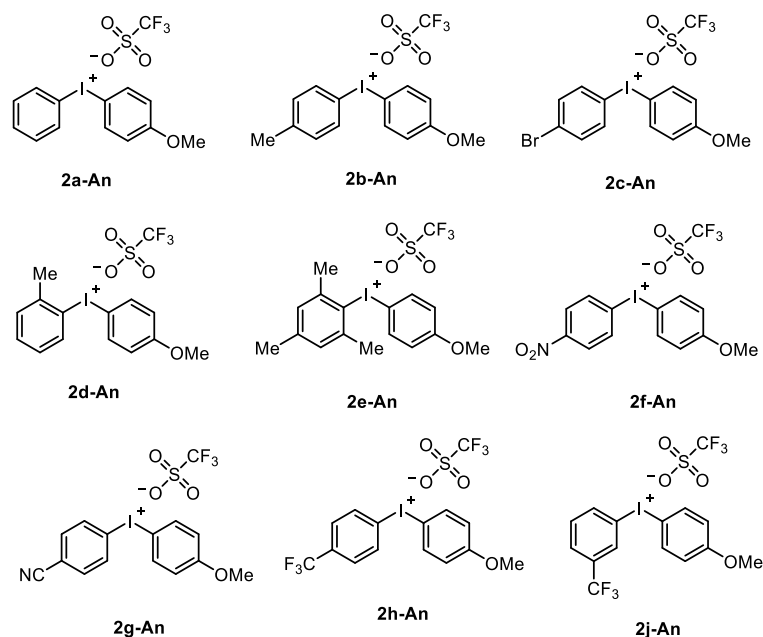

All diaryliodonium salts were prepared according to above mentioned procedures. Characterization data of these compounds were matched with those previously reported in the literature.

### 3.3 Synthesis of other counter-anion diaryliodonium salts

**Table S2.** Diaryliodonium salts synthesized by other methods

|  |                                                                                                                                                        |
|--|--------------------------------------------------------------------------------------------------------------------------------------------------------|
|  | <p>Diphenyliodonium bromide was prepared in 72% yield according to literature report.<sup>11</sup></p>                                                 |
|  | <p>Diphenyliodonium tosylate was prepared in 65% yield <i>via</i> anion exchange method from <b>2a</b> according to literature report.<sup>5</sup></p> |

## 4. OPTIMIZATION ON THE S-ARYLATION OF TETRAZOLE-5-THIOLS

### 4.1 Optimisation for phenylation

The arylation was tried with 1-methyltetrazol-5-thiol **1a** (0.1 mmol) and diphenyliodonium triflate **2a-OTf** (0.1 mmol) in toluene at room temperature (Scheme S2), delivering no *S*-arylated product **3a** (Table S3). In order to maintain the metal-free prospect, various organic and inorganic bases with varying time and temperature were optimized (Entries 1-26, Table S3).

Table S3: Initial optimization with diphenyliodonium salts<sup>a</sup>

Scheme S2:

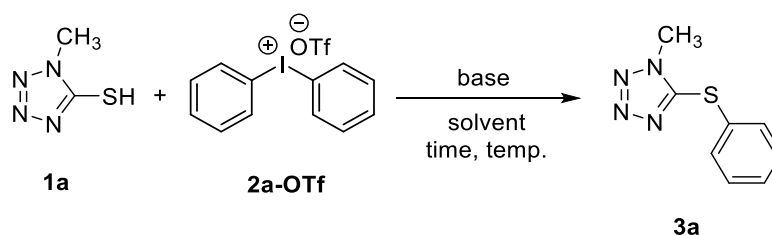

| Entry | 1a (eq.) | 2a (eq.) | Solvent            | Base                                     | Temp. (°C) | Time (h) | Yield (%) |
|-------|----------|----------|--------------------|------------------------------------------|------------|----------|-----------|
| 1     | 1        | 1        | Toluene            | -                                        | rt         | 24       | n.r.      |
| 2     | 1        | 1        | Toluene            | -                                        | 45         | 24       | n.r.      |
| 3     | 1        | 1        | Toluene            | -                                        | 60         | 24       | n.r.      |
| 4     | 1        | 1        | Toluene            | -                                        | 100        | 24       | n.r.      |
| 5     | 1        | 1        | Toluene            | Na <sub>2</sub> CO <sub>3</sub><br>(1.1) | rt         | 24       | n.r.      |
| 6     | 1        | 1        | DCE                | Na <sub>2</sub> CO <sub>3</sub><br>(1.1) | 45         | 24       | Trace     |
| 7     | 1        | 1        | Toluene            | Na <sub>2</sub> CO <sub>3</sub><br>(1.1) | 60         | 24       | 65        |
| 8     | 1        | 1        | Toluene            | Na <sub>2</sub> CO <sub>3</sub><br>(1.1) | 80         | 10       | 72        |
| 9     | 1        | 1        | Toluene            | Na <sub>2</sub> CO <sub>3</sub><br>(1.1) | 80         | 24       | 71        |
| 9     | 1        | 1        | Toluene            | Na <sub>2</sub> CO <sub>3</sub><br>(1.1) | 100        | 10       | 72        |
| 10    | 1        | 1        | Toluene            | NaHCO <sub>3</sub><br>(1.1)              | 80         | 12       | 60        |
| 11    | 1        | 1        | Toluene            | K <sub>2</sub> CO <sub>3</sub><br>(1.1)  | 80         | 12       | 62        |
| 12    | 1        | 1        | Toluene            | Et <sub>3</sub> N<br>(1.1)               | 80         | 10       | 70        |
| 13    | 1        | 1        | Toluene            | <i>t</i> BuOK<br>(1.1)                   | 80         | 12       | 48        |
| 14    | 1        | 1        | Toluene            | DABCO<br>(1.1)                           | 80         | 12       | 52        |
| 15    | 1        | 1        | Toluene            | DBU<br>(1.1)                             | 80         | 10       | 70        |
| 16    | 1        | 1        | Toluene            | NaOH<br>(1.1)                            | 80         | 12       | trace     |
| 17    | 1        | 1        | Toluene            | Pyridine<br>(1.1)                        | 80         | 12       | 50        |
| 18    | 1        | 1        | Toluene            | K <sub>3</sub> PO <sub>4</sub><br>(1.1)  | 80         | 12       | 45        |
| 19    | 1        | 1        | 1,4-dioxane        | Na <sub>2</sub> CO <sub>3</sub><br>(1.1) | 80         | 12       | 54        |
| 20    | 1        | 1        | DMF                | Na <sub>2</sub> CO <sub>3</sub><br>(1.1) | 80         | 12       | trace     |
| 21    | 1        | 1        | DMSO               | Na <sub>2</sub> CO <sub>3</sub><br>(1.1) | 80         | 12       | trace     |
| 22    | 1        | 1        | CH <sub>3</sub> CN | Na <sub>2</sub> CO <sub>3</sub>          | 80         | 12       | 70        |

|    |   |   |      |                                          |    |    |       |
|----|---|---|------|------------------------------------------|----|----|-------|
| 23 | 1 | 1 | DCM  | (1.1)<br>Na <sub>2</sub> CO <sub>3</sub> | 80 | 12 | 56    |
| 24 | 1 | 1 | DCE  | (1.1)<br>Na <sub>2</sub> CO <sub>3</sub> | 80 | 5  | 54    |
| 25 | 1 | 1 | MeOH | (1.1)<br>Na <sub>2</sub> CO <sub>3</sub> | 80 | 24 | trace |
| 26 | 2 | 1 | EtOH | (1.1)<br>Na <sub>2</sub> CO <sub>3</sub> | 80 | 24 | trace |

<sup>a</sup>Reaction conditions: **1a** (0.1 mmol), diphenyliodonium triflate (0.1 mmol), base (1.1 equiv.) and solvent (0.1 M) were added in a Schlenk tube. Yields based on <sup>1</sup>H NMR spectra.

**Table S4: Investigation for unsymmetrical iodonium salt<sup>a</sup>**

**Scheme S3:**

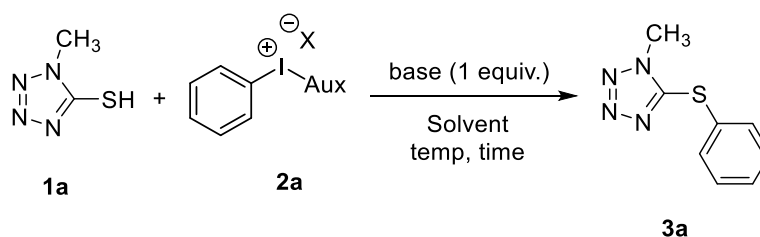

| Entry | 1a (eq.) | 2a (eq.)                          | Aux    | X               | Base                                     | Temp. (°C) | Time (h) | Yield (%)            |
|-------|----------|-----------------------------------|--------|-----------------|------------------------------------------|------------|----------|----------------------|
| 1     | 1        | <b>2a-OTf</b><br>(1.0)            | Ph     | OTf             | Na <sub>2</sub> CO <sub>3</sub><br>(1.1) | 80         | 12       | 72                   |
| 2     | 1        | <b>2a-OTs</b><br>(1.0)            | Ph     | OTs             | Na <sub>2</sub> CO <sub>3</sub><br>(1.1) | 80         | 12       | trace                |
| 3     | 1        | <b>2a-Br</b><br>(1.0)             | Ph     | Br              | Na <sub>2</sub> CO <sub>3</sub><br>(1.1) | 80         | 12       | 56                   |
| 4     | 1        | <b>2a-BF<sub>4</sub></b><br>(1.0) | Ph     | BF <sub>4</sub> | Na <sub>2</sub> CO <sub>3</sub><br>(1.1) | 80         | 112      | 75                   |
| 5     | 1        | <b>2a-TMP</b><br>(1.0)            | TMP    | TFA             | Na <sub>2</sub> CO <sub>3</sub><br>(1.1) | 80         | 5        | 85 (77) <sup>b</sup> |
| 6     | 1        | <b>2a-Mes</b><br>(1.0)            | Mes    | OTf             | Na <sub>2</sub> CO <sub>3</sub><br>(1.1) | 80         | 12       | trace                |
| 7     | 1        | <b>2a-An</b><br>(1.0)             | Anisyl | OTf             | Na <sub>2</sub> CO <sub>3</sub><br>(1.1) | 80         | 12       | 60                   |
| 8     | 1        | <b>2a-TMP</b><br>(1.0)            | TMP    | OTs             | Na <sub>2</sub> CO <sub>3</sub><br>(1.1) | 80         | 24       | trace                |
| 9     | 1        | <b>2a-TMP</b><br>(1.0)            | TMP    | OTf             | Na <sub>2</sub> CO <sub>3</sub><br>(1.1) | 80         | 24       | trace                |
| 10    | 1        | <b>2a-TMP</b><br>(1.2)            | TMP    | TFA             | Na <sub>2</sub> CO <sub>3</sub><br>(1.1) | 80         | 10       | 82                   |
| 11    | 1        | <b>2a-TMP</b><br>(1.0)            | TMP    | TFA             | Na <sub>2</sub> CO <sub>3</sub><br>(0.5) | 80         | 12       | 65                   |
| 12    | 1        | <b>2a-TMP</b><br>(1.0)            | TMP    | TFA             | Na <sub>2</sub> CO <sub>3</sub><br>(1.5) | 80         | 12       | 78                   |
| 13    | 1.2      | <b>2a-TMP</b><br>(1.0)            | TMP    | TFA             | Na <sub>2</sub> CO <sub>3</sub><br>(1.1) | 80         | 12       | 75                   |

|    |   |                        |     |     |                                          |     |    |    |
|----|---|------------------------|-----|-----|------------------------------------------|-----|----|----|
| 14 | 1 | <b>2a-TMP</b><br>(1.0) | TMP | TFA | Na <sub>2</sub> CO <sub>3</sub><br>(1.1) | 100 | 12 | 80 |
| 15 | 1 | <b>2a-TMP</b><br>(1.0) | TMP | TFA | Et <sub>3</sub> N (1.1)                  | 80  | 10 | 72 |
| 16 | 1 | <b>2a-TMP</b><br>(1.0) | TMP | TFA | K <sub>3</sub> PO <sub>4</sub><br>(1.1)  | 80  | 12 | 68 |

<sup>a</sup>Reaction conditions: **1a** (0.1 mmol), **2a** salts (0.1 mmol), base (1.1 equiv.) and solvent (0.1 M) were added in a Schlenk tube. Yields based on <sup>1</sup>H NMR spectra. <sup>b</sup>CH<sub>3</sub>CN as solvent.

## 5. OPTIMIZATION ON THE S-ARYLATION OF 2-MERCAPTOPYRIDINE (2-MP)

### 5.1 Initial optimization

As we tried to implement our protocol into *S*-phenylation of 2-mercaptopyridine, we were surprised that the reaction did not work and showed a prominent side product. Initially, we suspected that the side product would be *N*-arylated product of 2-MP. But, later it was confirmed from <sup>1</sup>H NMR spectrum that it was disulphide compound of 2-MP (Scheme S4). As a result, we further optimized on the factors by varying of temperature, bases and proper auxiliary selection of iodonium salt (Table S5).

**Table S5: Variation of factors on *S*-phenylation of 2-mercaptopyridine<sup>a</sup>**

**Scheme S4:**

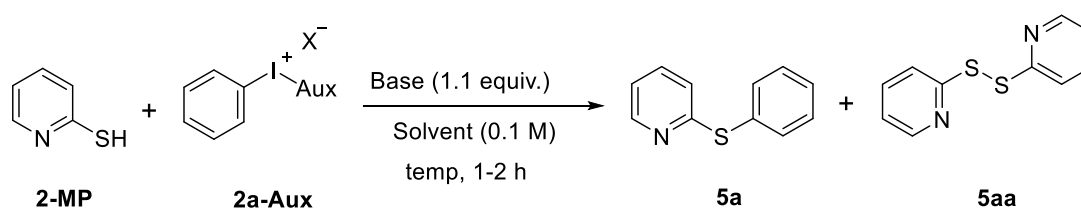

| Entry | 2-MP<br>(eq.) | 2a<br>(equiv.)         | Aux | X   | Base                                     | Solvent | T<br>(°C) | t<br>(h) | Yield (%) |     |
|-------|---------------|------------------------|-----|-----|------------------------------------------|---------|-----------|----------|-----------|-----|
|       |               |                        |     |     |                                          |         |           |          | 5a        | 5aa |
| 1     | 1             | <b>2a-TMP</b><br>(1.0) | TMP | TFA | Na <sub>2</sub> CO <sub>3</sub><br>(1.1) | Toluene | 80        | 3        | Trace     | -   |
| 2     | 1             | <b>2a-OTf</b><br>(1.0) | Ph  | OTf | Na <sub>2</sub> CO <sub>3</sub><br>(1.1) | Toluene | rt        | 2        | 0         | 100 |
| 3     | 1             | <b>2a-OTf</b><br>(1.0) | Ph  | OTf | Na <sub>2</sub> CO <sub>3</sub><br>(1.1) | Toluene | 45        | 3        | Trace     | 100 |
| 4     | 1             | <b>2a-OTf</b><br>(1.0) | Ph  | OTf | Na <sub>2</sub> CO <sub>3</sub><br>(1.1) | Toluene | 60        | 3        | 15        | 75  |
| 5     | 1             | <b>2a-OTf</b><br>(1.0) | Ph  | OTf | Na <sub>2</sub> CO <sub>3</sub><br>(1.1) | Toluene | 80        | 3        | 36        | 68  |

|    |     |                        |            |     |                                          |                 |     |   |       |       |
|----|-----|------------------------|------------|-----|------------------------------------------|-----------------|-----|---|-------|-------|
| 6  | 1   | <b>2a-OTf</b><br>(1.0) | Ph         | OTf | Na <sub>2</sub> CO <sub>3</sub><br>(1.1) | Toluene         | 100 | 2 | 78    | -     |
| 7  | 1   | <b>2a-OTf</b><br>(1.0) | Ph         | OTf | Na <sub>2</sub> CO <sub>3</sub><br>(1.1) | ACN             | 100 | 3 | 72    | trace |
| 8  | 1   | <b>2a-OTf</b><br>(1.0) | Ph         | OTf | Na <sub>2</sub> CO <sub>3</sub><br>(1.1) | DMF             | 100 | 5 | 46    | -     |
| 9  | 1   | <b>2a-OTf</b><br>(1.0) | Ph         | OTf | Na <sub>2</sub> CO <sub>3</sub><br>(1.0) | MeOH            | 100 | 5 | 28    | -     |
| 10 | 1   | <b>2a-OTf</b><br>(1.0) | Ph         | OTf | Na <sub>2</sub> CO <sub>3</sub><br>(1.1) | DCE             | 100 | 5 | 65    | -     |
| 11 | 1   | <b>2a-OTf</b><br>(1.0) | Ph         | OTf | Na <sub>2</sub> CO <sub>3</sub><br>(1.1) | 1,4-<br>dioxane | 100 | 5 | 68    | -     |
| 12 | 1   | <b>2a-OTf</b><br>(1.0) | Ph         | OTf | Et <sub>3</sub> N<br>(1.0)               | Toluene         | 100 | 3 | 75    | trace |
| 13 | 1   | <b>2a-OTf</b><br>(1.0) | Ph         | OTf | K <sub>3</sub> PO <sub>4</sub><br>(1.1)  | Toluene         | 100 | 5 | 46    | trace |
| 14 | 1   | <b>2a-OTf</b><br>(1.0) | Ph         | OTf | K <sub>2</sub> CO <sub>3</sub><br>(1.1)  | Toluene         | 100 | 5 | 68    | trace |
| 15 | 1   | <b>2a-OTf</b><br>(1.0) | Ph         | OTf | DABCO<br>(1.1)                           | Toluene         | 100 | 5 | 55    | 30    |
| 16 | 1   | <b>2a-OTf</b><br>(1.0) | Ph         | OTf | DBU<br>(1.0)                             | Toluene         | 100 | 3 | 72    | trace |
| 17 | 1.2 | <b>2a-OTf</b><br>(1.0) | Ph         | OTf | K <sup>t</sup> BuO<br>(1.0)              | Toluene         | 100 | 2 | 45    | trace |
| 18 | 1   | <b>2a-TMP</b><br>(1.0) | TMP        | TFA | Na <sub>2</sub> CO <sub>3</sub><br>(1.0) | Toluene         | 100 | 5 | 48    | trace |
| 19 | 1   | <b>2a-TMP</b><br>(1.0) | TMP        | OTs | Na <sub>2</sub> CO <sub>3</sub><br>(1.0) | Toluene         | 100 | 5 | trace | -     |
| 20 | 1   | <b>2a-TMP</b><br>(1.0) | TMP        | OTf | Na <sub>2</sub> CO <sub>3</sub><br>(1.0) | Toluene         | 100 | 5 | -     | trace |
| 21 | 1   | <b>2a-Mes</b><br>(1.0) | Mes        | OTf | Na <sub>2</sub> CO <sub>3</sub><br>(1.0) | Toluene         | 100 | 3 | trace | -     |
| 22 | 1   | <b>2a-An</b><br>(1.0)  | anis<br>yl | OTf | Na <sub>2</sub> CO <sub>3</sub><br>(1.0) | Toluene         | 100 | 2 | 78    | -     |

<sup>a</sup>Reaction conditions: **2-MP** (0.1 mmol), **2a** salts (0.1 mmol), base (1.1 equiv.) and solvent (0.1 M) were added in a Schlenk tube. Yields based on <sup>1</sup>H NMR spectra. Toluene was degassed before use.

## 5.2 Validation of 4a and 4aa by HRMS

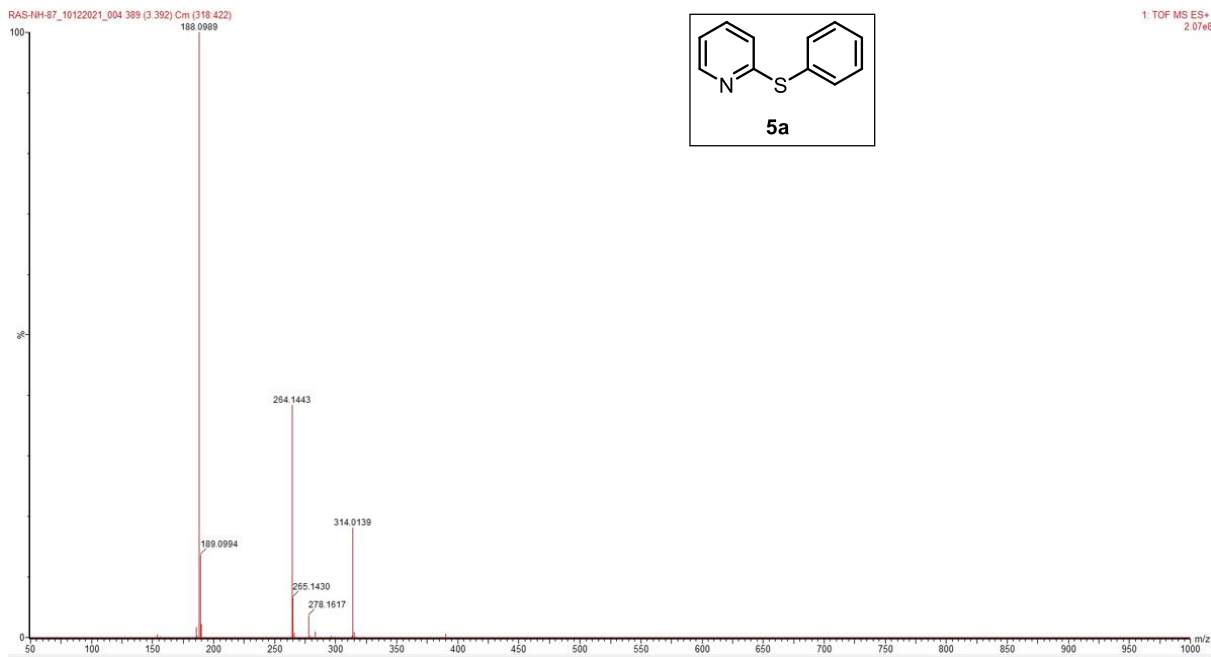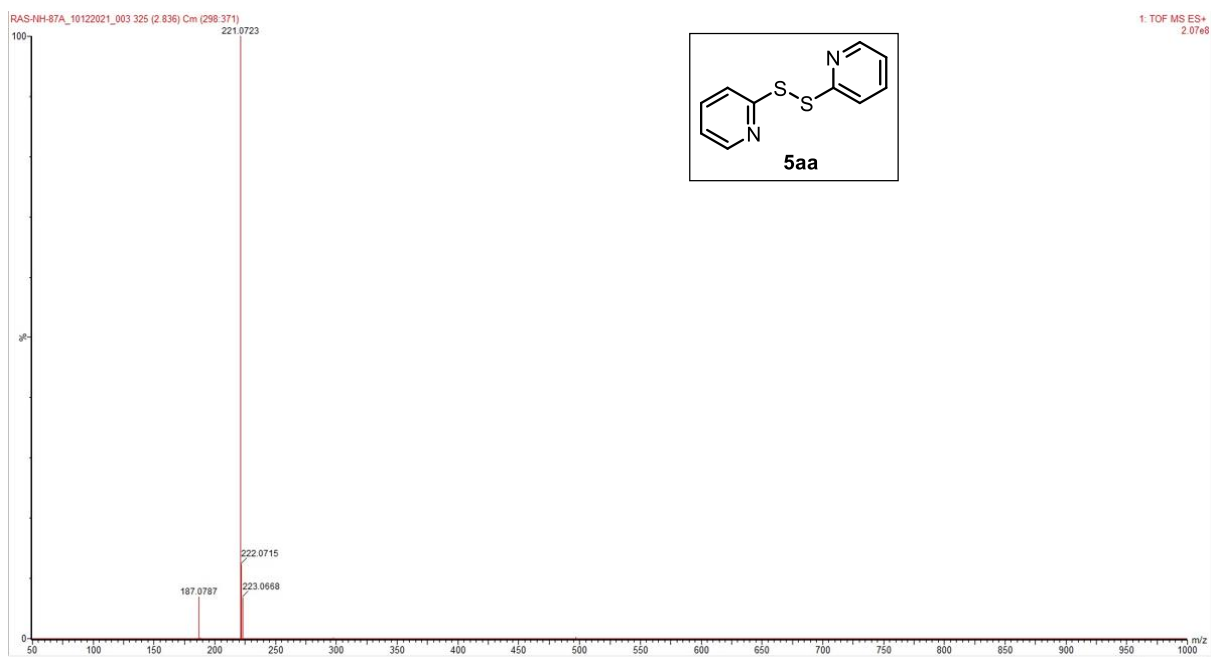

## 6. PROCEDURES

### 6.1 General procedure A: S-arylation of tetrazole-5-thiols or other azoles

Scheme S5

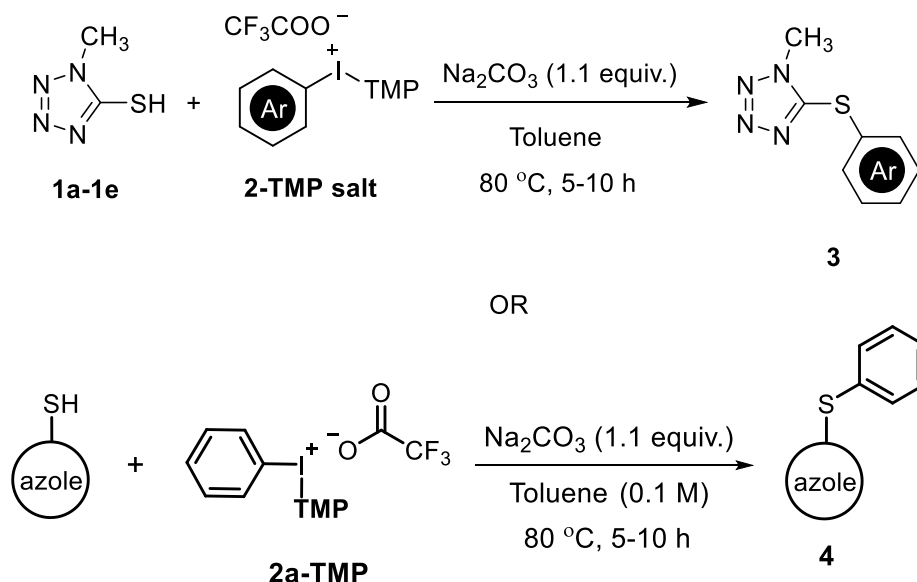

To an oven-dried Schlenk-tube, tetrazole-5-thiol **1** or **azole** (0.35 mmol), diaryliodonium salt **2-TMP** (0.35 mmol, 1 equiv.), and  $\text{Na}_2\text{CO}_3$  (0.385 mmol, 1.1 equiv.) were added. After adding toluene (3.5 mL, 0.1 M), the tube was sealed and placed on a pre-heated oil bath at 80 °C. The reaction mixture was stirred till indicated time period. After removing from heat, the reaction was cooled to room temperature and performed work-up with EtOAc and water. The organic layer was dried over anhydrous  $\text{Na}_2\text{SO}_4$  and concentrated under reduced pressure. Then, the crude product was purified using column-chromatography to obtain the desired product.

### 6.2 General procedure B: S-arylation of 2-mercaptopyridine

Scheme S6

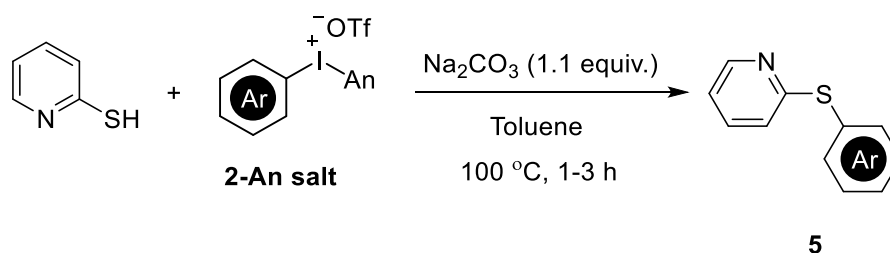

To an oven-dried Schlenk-tube, 2-mercaptopyridine (0.25 mmol), diaryliodonium salt **2-An** (0.25 mmol, 1 equiv.), and  $\text{Na}_2\text{CO}_3$  (0.275 mmol, 1.1 equiv.) were added. After adding toluene (3.5 mL, 0.1 M), the tube was sealed and placed on a pre-heated oil bath at 100 °C. After removing from heat, the reaction was cooled to room temperature and performed work-up with EtOAc and water. The organic layer was dried over anhydrous  $\text{Na}_2\text{SO}_4$  and concentrated under reduced pressure. Then, the crude product was purified using column-chromatography to obtain the desired product.

## 7. DFT STUDIES

Geometry optimizations, ground state energies and vibrational frequencies of the species in interest are obtained using Gaussian 09 program.<sup>12</sup> A popular and reliable Becke-3-parameter-Lee-Yang-Parr B3LYP functional along with LANL2DZ basis set is chosen for the geometry optimizations. B3LYP functional is chosen as it gives accurate structures and energies for the reactions including aryl iodonium salts.<sup>13,14</sup> Vibrational frequency calculations are done in order to distinguish between a minima (No imaginary frequency) and a transition state (One imaginary frequency). Berny algorithm<sup>15</sup> is carried out for the geometry optimization of a transition state structure. IRC calculations<sup>16</sup> have been performed for each TS in order to confirm the reaction path where it connects the transition state with its two neighbouring minima.

### 6.1 Cartesian coordinates of all the optimized intermediates and transition states

| Species      | Z  | x           | y            | z            |
|--------------|----|-------------|--------------|--------------|
| <b>2a-An</b> | 6  | 4.618164000 | 3.317509000  | 0.679257000  |
|              | 6  | 3.931871000 | 2.612760000  | 1.688121000  |
|              | 6  | 2.709491000 | 1.974378000  | 1.402078000  |
|              | 6  | 2.194235000 | 2.044115000  | 0.095173000  |
|              | 6  | 2.866298000 | 2.744997000  | -0.922623000 |
|              | 6  | 4.086097000 | 3.385094000  | -0.621975000 |
|              | 1  | 5.559075000 | 3.811677000  | 0.906964000  |
|              | 1  | 4.339712000 | 2.562106000  | 2.694156000  |
|              | 1  | 2.182272000 | 1.434844000  | 2.184026000  |
|              | 1  | 2.459327000 | 2.800762000  | -1.929060000 |
|              | 1  | 4.611956000 | 3.930051000  | -1.401448000 |
|              | 53 | 0.290859000 | 1.112161000  | -0.364604000 |
|              | 6  | 2.285770000 | -1.179382000 | -0.974681000 |
|              | 6  | 2.807671000 | -2.476578000 | -0.904128000 |
|              | 6  | 2.154327000 | -3.463647000 | -0.129872000 |
|              | 6  | 0.978079000 | -3.146931000 | 0.581885000  |
|              | 6  | 0.445183000 | -1.843727000 | 0.523599000  |



|             |    |              |              |              |
|-------------|----|--------------|--------------|--------------|
|             | 6  | 1.115431000  | -0.893087000 | -0.250638000 |
|             | 1  | 2.790719000  | -0.427402000 | -1.572591000 |
|             | 1  | 3.708113000  | -2.746558000 | -1.446177000 |
|             | 1  | 0.455999000  | -3.890188000 | 1.174532000  |
|             | 1  | -0.476618000 | -1.613849000 | 1.056073000  |
|             | 8  | 2.752579000  | -4.714505000 | -0.139781000 |
|             | 6  | 2.118236000  | -5.809064000 | 0.591889000  |
|             | 1  | 2.754541000  | -6.677141000 | 0.413025000  |
|             | 1  | 2.077815000  | -5.592835000 | 1.667717000  |
|             | 1  | 1.107310000  | -6.002944000 | 0.210420000  |
|             | 16 | -3.052263000 | -0.676049000 | -0.090952000 |
|             | 8  | -2.433778000 | -1.020558000 | 1.384887000  |
|             | 8  | -3.986347000 | -1.775282000 | -0.823263000 |
|             | 8  | -1.906727000 | 0.049235000  | -1.062796000 |
|             | 6  | -4.244370000 | 0.906461000  | 0.271366000  |
|             | 9  | -3.464106000 | 1.976293000  | 0.706954000  |
|             | 9  | -5.171747000 | 0.611902000  | 1.254450000  |
|             | 9  | -4.914621000 | 1.293498000  | -0.875566000 |
| <b>2-MP</b> | 6  | 0.573757000  | -0.034144000 | -0.000042000 |
|             | 6  | -0.175872000 | 1.200427000  | -0.000046000 |
|             | 6  | -1.572584000 | 1.201815000  | 0.000023000  |
|             | 6  | -2.272936000 | -0.032382000 | 0.000033000  |
|             | 6  | -1.488617000 | -1.201991000 | -0.000009000 |
|             | 7  | -0.134139000 | -1.230392000 | -0.000020000 |
|             | 1  | -2.117782000 | 2.147064000  | 0.000060000  |
|             | 1  | 0.386994000  | 2.129819000  | -0.000121000 |
|             | 1  | -3.359845000 | -0.083625000 | 0.000063000  |
|             | 1  | -1.973398000 | -2.181860000 | -0.000035000 |
|             | 16 | 2.351282000  | -0.012562000 | 0.000026000  |

|     |    |              |              |              |
|-----|----|--------------|--------------|--------------|
| IMI | 6  | -0.137979000 | 4.252717000  | 0.873682000  |
|     | 6  | -1.193924000 | 3.373676000  | 1.181026000  |
|     | 6  | -1.203529000 | 2.055120000  | 0.678016000  |
|     | 6  | -0.124306000 | 1.663724000  | -0.119189000 |
|     | 6  | 0.948912000  | 2.503735000  | -0.442489000 |
|     | 6  | 0.930309000  | 3.819273000  | 0.064713000  |
|     | 1  | -0.147227000 | 5.269157000  | 1.259679000  |
|     | 1  | -2.018322000 | 3.703779000  | 1.807799000  |
|     | 1  | -2.013673000 | 1.361372000  | 0.901761000  |
|     | 1  | 1.777850000  | 2.162894000  | -1.054025000 |
|     | 1  | 1.746515000  | 4.494467000  | -0.179321000 |
|     | 53 | -0.139621000 | -0.377338000 | -0.919706000 |
|     | 6  | 2.970748000  | -0.675184000 | -1.428300000 |
|     | 6  | 4.325289000  | -0.872811000 | -1.118840000 |
|     | 6  | 4.731503000  | -0.970981000 | 0.229732000  |
|     | 6  | 3.779404000  | -0.873940000 | 1.268006000  |
|     | 6  | 2.420973000  | -0.678861000 | 0.947275000  |
|     | 6  | 2.018876000  | -0.572257000 | -0.393139000 |
|     | 1  | 2.669439000  | -0.604514000 | -2.471280000 |
|     | 1  | 5.077979000  | -0.953368000 | -1.897290000 |
|     | 1  | 4.073612000  | -0.949835000 | 2.310042000  |
|     | 1  | 1.692916000  | -0.605133000 | 1.751641000  |
|     | 8  | 6.096339000  | -1.164798000 | 0.429564000  |
|     | 6  | 6.598804000  | -1.285520000 | 1.792868000  |
|     | 1  | 7.675727000  | -1.429788000 | 1.689374000  |
|     | 1  | 6.401545000  | -0.372472000 | 2.371298000  |
|     | 1  | 6.156639000  | -2.151891000 | 2.303648000  |
|     | 6  | -3.781512000 | -0.692886000 | -0.153463000 |
|     | 6  | -4.981954000 | -1.446354000 | -0.288854000 |
|     | 6  | -5.613669000 | -1.951547000 | 0.854883000  |

|            |    |              |              |              |
|------------|----|--------------|--------------|--------------|
|            | 6  | -5.042036000 | -1.715174000 | 2.125489000  |
|            | 6  | -3.855391000 | -0.968363000 | 2.178598000  |
|            | 7  | -3.238348000 | -0.461515000 | 1.078887000  |
|            | 1  | -6.532511000 | -2.525856000 | 0.760349000  |
|            | 1  | -5.387693000 | -1.619609000 | -1.279857000 |
|            | 1  | -5.497006000 | -2.094085000 | 3.035722000  |
|            | 1  | -3.372863000 | -0.756988000 | 3.130962000  |
|            | 16 | -2.984276000 | -0.010401000 | -1.636557000 |
|            | 6  | -2.621469000 | -1.260912000 | 1.571311000  |
|            | 6  | -2.343936000 | -1.587057000 | 0.231755000  |
|            | 6  | -3.302516000 | -2.232569000 | -0.569170000 |
|            | 6  | -4.564256000 | -2.548801000 | -0.021012000 |
|            | 1  | -5.827393000 | -2.464562000 | 1.737402000  |
|            | 1  | -4.106369000 | -1.323855000 | 3.145345000  |
|            | 1  | -1.876916000 | -0.763216000 | 2.187980000  |
|            | 1  | -3.084201000 | -2.489270000 | -1.603861000 |
|            | 1  | -5.310349000 | -3.045475000 | -0.636975000 |
|            | 53 | -0.309110000 | -1.209398000 | -0.633016000 |
|            | 6  | -1.864233000 | 1.482500000  | -0.801683000 |
|            | 6  | -2.050561000 | 2.864998000  | -0.664905000 |
|            | 6  | -1.020661000 | 3.667590000  | -0.125125000 |
|            | 6  | 0.197809000  | 3.085094000  | 0.282921000  |
|            | 6  | 0.396319000  | 1.696595000  | 0.143665000  |
|            | 6  | -0.639890000 | 0.929945000  | -0.391512000 |
|            | 1  | -2.660366000 | 0.867134000  | -1.207836000 |
|            | 1  | -2.977371000 | 3.337844000  | -0.973709000 |
|            | 1  | 0.999460000  | 3.685585000  | 0.699903000  |
|            | 1  | 1.334323000  | 1.229990000  | 0.445577000  |
|            | 8  | -1.310707000 | 5.026494000  | -0.038874000 |
|            | 6  | -0.289617000 | 5.931623000  | 0.475832000  |
| <b>IM2</b> |    |              |              |              |

|            |    |              |              |              |
|------------|----|--------------|--------------|--------------|
|            | 1  | -0.738136000 | 6.925633000  | 0.429161000  |
|            | 1  | -0.032724000 | 5.689389000  | 1.516156000  |
|            | 1  | 0.614972000  | 5.902659000  | -0.146493000 |
|            | 6  | 3.375759000  | -0.723108000 | -0.299799000 |
|            | 6  | 4.678221000  | -1.291076000 | -0.389819000 |
|            | 6  | 5.487101000  | -1.350679000 | 0.752387000  |
|            | 6  | 4.991789000  | -0.856948000 | 1.980340000  |
|            | 6  | 3.697033000  | -0.316465000 | 1.991834000  |
|            | 7  | 2.906325000  | -0.239819000 | 0.889130000  |
|            | 1  | 6.484219000  | -1.780845000 | 0.691414000  |
|            | 1  | 5.022730000  | -1.672798000 | -1.344966000 |
|            | 1  | 5.583876000  | -0.890814000 | 2.889935000  |
|            | 1  | 3.266161000  | 0.076436000  | 2.910805000  |
|            | 16 | 2.344223000  | -0.617450000 | -1.791979000 |
| <b>TS1</b> | 6  | -0.978538000 | 3.709436000  | 1.613247000  |
|            | 6  | -1.271958000 | 2.439289000  | 2.148051000  |
|            | 6  | -1.204343000 | 1.281441000  | 1.343356000  |
|            | 6  | -0.860601000 | 1.459258000  | 0.000492000  |
|            | 6  | -0.540530000 | 2.694534000  | -0.575615000 |
|            | 6  | -0.617615000 | 3.832062000  | 0.256846000  |
|            | 1  | -1.031085000 | 4.592615000  | 2.244485000  |
|            | 1  | -1.558767000 | 2.334839000  | 3.192053000  |
|            | 1  | -1.460647000 | 0.299947000  | 1.727295000  |
|            | 1  | -0.280603000 | 2.789499000  | -1.624329000 |
|            | 1  | -0.396678000 | 4.808587000  | -0.168145000 |
|            | 53 | 0.141776000  | -0.477408000 | -1.057460000 |
|            | 6  | 3.191252000  | 0.204066000  | -1.313274000 |
|            | 6  | 4.543040000  | 0.218831000  | -0.945629000 |
|            | 6  | 4.959918000  | -0.429295000 | 0.238675000  |
|            | 6  | 4.018817000  | -1.093237000 | 1.054564000  |

|            |    |              |              |              |
|------------|----|--------------|--------------|--------------|
|            | 6  | 2.661260000  | -1.104751000 | 0.678834000  |
|            | 6  | 2.247664000  | -0.464766000 | -0.502498000 |
|            | 1  | 2.880739000  | 0.705918000  | -2.225662000 |
|            | 1  | 5.287966000  | 0.722089000  | -1.554231000 |
|            | 1  | 4.320286000  | -1.595934000 | 1.967857000  |
|            | 1  | 1.939831000  | -1.616241000 | 1.310321000  |
|            | 8  | 6.322403000  | -0.353983000 | 0.510891000  |
|            | 6  | 6.837515000  | -0.991348000 | 1.717155000  |
|            | 1  | 7.911025000  | -0.794778000 | 1.708552000  |
|            | 1  | 6.387931000  | -0.554319000 | 2.619225000  |
|            | 1  | 6.659329000  | -2.075257000 | 1.699838000  |
|            | 6  | -3.694461000 | -0.626588000 | -0.241180000 |
|            | 6  | -5.115721000 | -0.585784000 | -0.169988000 |
|            | 6  | -5.780409000 | -1.348584000 | 0.799032000  |
|            | 6  | -5.025054000 | -2.131588000 | 1.700631000  |
|            | 6  | -3.626286000 | -2.098290000 | 1.584662000  |
|            | 7  | -2.966864000 | -1.372147000 | 0.643613000  |
|            | 1  | -6.866468000 | -1.333882000 | 0.854463000  |
|            | 1  | -5.662281000 | 0.032956000  | -0.873834000 |
|            | 1  | -5.500840000 | -2.740988000 | 2.463327000  |
|            | 1  | -2.998605000 | -2.676068000 | 2.260704000  |
|            | 16 | -2.838759000 | 0.315778000  | -1.529571000 |
| <b>TS2</b> | 6  | 5.519235000  | -0.281192000 | -1.219257000 |
|            | 6  | 4.476408000  | -0.634626000 | -2.097879000 |
|            | 6  | 3.190434000  | -0.917344000 | -1.595375000 |
|            | 6  | 2.961555000  | -0.848234000 | -0.207200000 |
|            | 6  | 3.995983000  | -0.490266000 | 0.679251000  |
|            | 6  | 5.278412000  | -0.209370000 | 0.166761000  |
|            | 1  | 6.509734000  | -0.062851000 | -1.610873000 |
|            | 1  | 4.658728000  | -0.690695000 | -3.168316000 |

|  |    |              |              |              |
|--|----|--------------|--------------|--------------|
|  | 1  | 2.387846000  | -1.189241000 | -2.275545000 |
|  | 1  | 3.815071000  | -0.433586000 | 1.749313000  |
|  | 1  | 6.080734000  | 0.063740000  | 0.847844000  |
|  | 53 | 0.961519000  | -1.269971000 | 0.572757000  |
|  | 6  | 0.124341000  | 1.742975000  | 1.617520000  |
|  | 6  | -0.107972000 | 3.109022000  | 1.387005000  |
|  | 6  | -0.682479000 | 3.542666000  | 0.171817000  |
|  | 6  | -1.030777000 | 2.606135000  | -0.823282000 |
|  | 6  | -0.802838000 | 1.228188000  | -0.608748000 |
|  | 6  | -0.252774000 | 0.842771000  | 0.611067000  |
|  | 1  | 0.546112000  | 1.408624000  | 2.558945000  |
|  | 1  | 0.143535000  | 3.847949000  | 2.141817000  |
|  | 1  | -1.479820000 | 2.916761000  | -1.761386000 |
|  | 1  | -1.096559000 | 0.487379000  | -1.344589000 |
|  | 8  | -0.861105000 | 4.924636000  | 0.055493000  |
|  | 6  | -1.479881000 | 5.445690000  | -1.154737000 |
|  | 1  | -1.528643000 | 6.526891000  | -1.011061000 |
|  | 1  | -0.873267000 | 5.218260000  | -2.042874000 |
|  | 1  | -2.494393000 | 5.044313000  | -1.287757000 |
|  | 6  | -2.962277000 | -1.384686000 | 0.314535000  |
|  | 6  | -4.376142000 | -1.440748000 | 0.471766000  |
|  | 6  | -5.180757000 | -1.760904000 | -0.629511000 |
|  | 6  | -4.573657000 | -2.004041000 | -1.882087000 |
|  | 6  | -3.175747000 | -1.901779000 | -1.963802000 |
|  | 7  | -2.380375000 | -1.603116000 | -0.902708000 |
|  | 1  | -6.260960000 | -1.819185000 | -0.517458000 |
|  | 1  | -4.807618000 | -1.240661000 | 1.446845000  |
|  | 1  | -5.159990000 | -2.260799000 | -2.759433000 |
|  | 1  | -2.660229000 | -2.070455000 | -2.907523000 |
|  | 16 | -1.919731000 | -1.029924000 | 1.752120000  |

|           |             |              |              |              |
|-----------|-------------|--------------|--------------|--------------|
| <b>5a</b> | 6           | -3.756913000 | 0.935631000  | -0.000734000 |
|           | 6           | -3.166871000 | 0.548692000  | -1.219699000 |
|           | 6           | -1.988424000 | -0.222304000 | -1.221372000 |
|           | 6           | -1.404770000 | -0.602392000 | 0.000347000  |
|           | 6           | -1.988313000 | -0.220424000 | 1.221530000  |
|           | 6           | -3.166751000 | 0.550569000  | 1.218774000  |
|           | 1           | -4.667533000 | 1.530354000  | -0.001149000 |
|           | 1           | -3.618479000 | 0.844192000  | -2.163623000 |
|           | 1           | -1.526879000 | -0.521307000 | -2.157916000 |
|           | 1           | -1.526698000 | -0.518024000 | 2.158487000  |
|           | 1           | -3.618293000 | 0.847503000  | 2.162281000  |
|           | 6           | 1.477511000  | -0.442457000 | 0.000312000  |
|           | 6           | 2.798283000  | -0.949490000 | -0.000323000 |
|           | 6           | 3.858474000  | -0.030384000 | -0.000795000 |
|           | 6           | 3.575621000  | 1.353038000  | -0.000646000 |
|           | 6           | 2.229613000  | 1.754119000  | -0.000013000 |
|           | 7           | 1.196844000  | 0.871364000  | 0.000477000  |
|           | 1           | 4.885771000  | -0.385378000 | -0.001279000 |
|           | 1           | 2.980687000  | -2.019906000 | -0.000470000 |
|           | 1           | 4.369636000  | 2.093320000  | -0.000989000 |
|           | 1           | 1.954188000  | 2.805618000  | 0.000131000  |
|           | 16          | 0.099058000  | -1.676469000 | 0.001057000  |
|           | <b>An-I</b> | 53           | -2.342741000 | -0.079020000 |
| 6         |             | 0.406757000  | 1.345213000  | 0.000004000  |
| 6         |             | 1.805275000  | 1.444735000  | -0.000005000 |
| 6         |             | 2.599516000  | 0.278011000  | -0.000014000 |
| 6         |             | 1.987395000  | -0.991963000 | -0.000019000 |
| 6         |             | 0.580685000  | -1.088526000 | -0.000010000 |
| 6         |             | -0.204745000 | 0.074332000  | 0.000005000  |
| 1         |             | -0.194757000 | 2.248796000  | 0.000017000  |

|    |   |              |              |              |
|----|---|--------------|--------------|--------------|
|    | 1 | 2.297131000  | 2.412501000  | -0.000001000 |
|    | 1 | 2.576641000  | -1.903272000 | -0.000040000 |
|    | 1 | 0.115621000  | -2.069535000 | -0.000018000 |
|    | 8 | 3.977930000  | 0.491077000  | -0.000020000 |
|    | 6 | 4.864845000  | -0.664764000 | 0.000032000  |
|    | 1 | 5.875295000  | -0.251739000 | 0.000092000  |
|    | 1 | 4.716717000  | -1.279758000 | 0.898624000  |
|    | 1 | 4.716824000  | -1.279756000 | -0.898581000 |
| 5i | 6 | -1.064002000 | 0.821774000  | 1.276543000  |
|    | 6 | -2.342790000 | 0.267276000  | 1.413615000  |
|    | 6 | -3.063533000 | -0.129876000 | 0.266429000  |
|    | 6 | -2.501053000 | 0.031252000  | -1.016951000 |
|    | 6 | -1.214083000 | 0.589254000  | -1.141639000 |
|    | 6 | -0.495388000 | 0.984184000  | -0.003346000 |
|    | 1 | -0.506901000 | 1.124614000  | 2.158133000  |
|    | 1 | -2.799021000 | 0.131405000  | 2.389259000  |
|    | 1 | -3.039308000 | -0.268599000 | -1.910302000 |
|    | 1 | -0.773513000 | 0.710940000  | -2.126892000 |
|    | 8 | -4.326797000 | -0.669933000 | 0.510844000  |
|    | 6 | -5.129383000 | -1.113051000 | -0.620851000 |
|    | 1 | -6.054838000 | -1.494867000 | -0.185321000 |
|    | 1 | -5.356713000 | -0.278633000 | -1.298933000 |
|    | 1 | -4.624070000 | -1.914613000 | -1.177367000 |
|    | 6 | 2.318134000  | 0.338469000  | -0.076113000 |
|    | 6 | 3.703054000  | 0.618760000  | -0.149079000 |
|    | 6 | 4.600351000  | -0.457092000 | -0.071300000 |
|    | 6 | 4.097770000  | -1.768345000 | 0.077001000  |
|    | 6 | 2.705311000  | -1.940775000 | 0.140381000  |
|    | 7 | 1.829180000  | -0.905154000 | 0.064256000  |
|    | 1 | 5.671018000  | -0.277305000 | -0.124111000 |



|             |            |              |              |              |
|-------------|------------|--------------|--------------|--------------|
|             | 1          | 4.055843000  | 1.639615000  | -0.261121000 |
|             | 1          | 4.761221000  | -2.625195000 | 0.141667000  |
|             | 1          | 2.263907000  | -2.927520000 | 0.255000000  |
|             | 16         | 1.157886000  | 1.776545000  | -0.185294000 |
| <b>Ph-I</b> | 6          | 3.382579000  | 0.000005000  | -0.000262000 |
|             | 6          | 2.675664000  | -1.217527000 | -0.000070000 |
|             | 6          | 1.266134000  | -1.224680000 | 0.000240000  |
|             | 6          | 0.573228000  | -0.000007000 | 0.000520000  |
|             | 6          | 1.266123000  | 1.224676000  | 0.000250000  |
|             | 6          | 2.675655000  | 1.217532000  | -0.000064000 |
|             | 1          | 4.469658000  | 0.000010000  | -0.000562000 |
|             | 1          | 3.212341000  | -2.163092000 | -0.000192000 |
|             | 1          | 0.726482000  | -2.166602000 | 0.000352000  |
|             | 1          | 0.726472000  | 2.166599000  | 0.000347000  |
|             | 1          | 3.212326000  | 2.163100000  | -0.000239000 |
|             | 53         | -1.573275000 | 0.000000000  | -0.000064000 |
|             | <b>OTf</b> | 16           | 1.013955000  | 0.000007000  |
| 8           |            | 1.336722000  | 1.294572000  | -0.944333000 |
| 8           |            | 1.336855000  | 0.170555000  | 1.593242000  |
| 8           |            | 1.336798000  | -1.465091000 | -0.648936000 |
| 6           |            | -1.033812000 | 0.000002000  | 0.000011000  |
| 9           |            | -1.559381000 | -0.138319000 | -1.291392000 |
| 9           |            | -1.559408000 | 1.187535000  | 0.525953000  |
| 9           |            | -1.559367000 | -1.049261000 | 0.765484000  |

## 6.2 Absolute and Relative Gibbs free energies for reaction pathway at B3LYP/LANL2DZ level

| Species                   | G (in a.u.)  | Relative G (in kcal/mol) |
|---------------------------|--------------|--------------------------|
| 2a-An+2-MP (deprotonated) | -1419.761809 | 0.00                     |

|             |              |              |
|-------------|--------------|--------------|
| IM1+OTf     | -1419.795936 | -21.41499964 |
| TS1+OTf     | -1419.772011 | -6.401846818 |
| 5a+An-I+OTf | -1419.895501 | -83.89293323 |

|                           |              |              |
|---------------------------|--------------|--------------|
| 2a-An+2-MP (deprotonated) | -1419.761809 | 0.00         |
| IM2+OTf                   | -1419.796404 | -21.70867386 |
| TS2+OTf                   | -1419.769484 | -4.816131575 |
| 5i+Ph-I+OTf               | -1419.896029 | -84.22425798 |

### 6.3 Intrinsic reaction co-ordinate (IRC) plots of all transition states

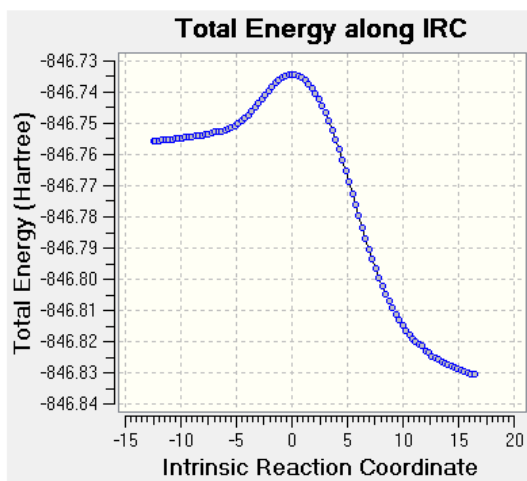

IM1-TS1-5a

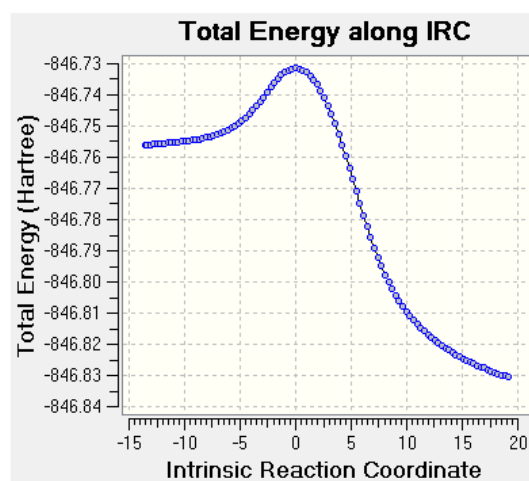

IM2-TS2-5i

## 8. SYNTHESIS AND CHARACTERIZATION OF S-ARYL PRODUCTS

### 1-methyl-5-(phenylthio)-1*H*-tetrazole

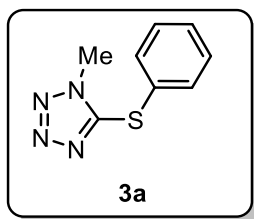

Synthesized following **general procedure A** starting from **1a** (40.6 mg, 0.35 mmol) and **2a-TMP** (169.5 mg, 0.35 mmol). The reaction was stirred for 5 h. The reaction mixture was purified by column chromatography (AcOEt/Hexane: 10/90 → 30/70) to afford **3a** (55 mg, 0.285 mmol, 82%) as yellowish liquid.  $R_f$  0.3 (AcOEt /Hexane: 30/70).

$^1\text{H NMR}$  (400 MHz,  $\text{CDCl}_3$ )  $\delta$  = 7.50-7.52 (m, 2H), 7.39-7.41 (m, 3H), 3.96 (s, 3H)

$^{13}\text{C NMR}$  (100 MHz,  $\text{CDCl}_3$ )  $\delta$  = 152.4, 132.5, 130, 129.6, 127.8, 34.1

HRMS (ESI)  $m/z$ :  $[\text{M}+\text{H}]^+$  calculated for  $\text{C}_8\text{H}_8\text{N}_4\text{S}$  192.0470; found 193.0939

### 1-methyl-5-(*p*-tolylthio)-1*H*-tetrazole

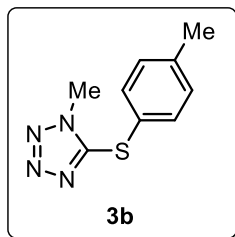

Synthesized following **general procedure A** starting from **1a** (40.6 mg, 0.35 mmol) and **2b-TMP** (174.38 mg, 0.35 mmol). The reaction was stirred for 5 h. The reaction mixture was purified by column chromatography (AcOEt/Hexane: 10/90 → 30/70) to afford **3b** (65 mg, 0.318 mmol, 91%) as colourless liquid.  $R_f$  0.4 (AcOEt /Hexane: 30/70).

$^1\text{H NMR}$  (400 MHz,  $\text{CDCl}_3$ )  $\delta$  = 7.40 (d,  $J=8$  Hz, 2H), 7.18 (d,  $J=8$  Hz, 2H), 3.95 (s, 3H), 2.36 (s, 3H)

$^{13}\text{C NMR}$  (100 MHz,  $\text{CDCl}_3$ )  $\delta$  = 153.0, 140.2, 133.1, 130.7, 123.8, 34.17, 21.34

HRMS (ESI)  $m/z$ :  $[\text{M}+\text{H}]^+$  calculated for  $\text{C}_9\text{H}_{10}\text{N}_4\text{S}$  206.0626; found 207.1145

**1-methyl-5-(*o*-tolylthio)-1*H*-tetrazole**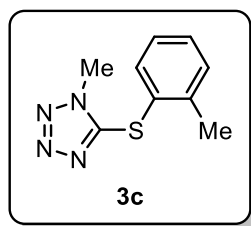

Synthesized following **general procedure A** starting from **1a** (40.6 mg, 0.35 mmol) and **2c-TMP** (174.3 mg, 0.35 mmol). The reaction was stirred for 8 h. The reaction mixture was purified by column chromatography (AcOEt/Hexane: 10/90 → 30/70) to afford **3a** (56 mg, 0.35 mmol, 78%) as yellowish oil.  $R_f$  0.35 (AcOEt /Hexane: 30/70).

**<sup>1</sup>H NMR** (400 MHz, CDCl<sub>3</sub>)  $\delta$  = 7.44 (d,  $J$ =8 Hz, 2H), 7.31-7.36 (m, 2H), 7.20-7.23 (m, 1H) 3.96 (s, 3H), 2.46 (s, 3H)

**<sup>13</sup>C NMR** (100 MHz, CDCl<sub>3</sub>)  $\delta$  = 152.6, 141.3, 134.3, 131.5, 130.4, 127.5, 126.6, 34.0, 20.8

HRMS (ESI)  $m/z$ : [M+H]<sup>+</sup> calculated for C<sub>9</sub>H<sub>10</sub>N<sub>4</sub>S 206.0626; found 207.0917

**5-((4-fluorophenyl)thio)-1-methyl-1*H*-tetrazole**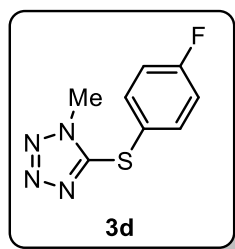

Synthesized following **general procedure A** starting from **1a** (40.6 mg, 0.35 mmol) and **2d-TMP** (175.7 mg, 0.35 mmol). The reaction was stirred for 8 h. The reaction mixture was purified by column chromatography (AcOEt/Hexane: 10/90 → 30/70) to afford **3d** (56 mg, 0.26 mmol, 76%) as yellowish oil.  $R_f$  0.3 (AcOEt /Hexane: 30/70).

**<sup>1</sup>H NMR** (400 MHz, CDCl<sub>3</sub>)  $\delta$  = 7.53-7.56 (m, 2H), 7.08-7.10 (m, 2H), 3.96 (s, 3H)

**<sup>13</sup>C NMR** (100 MHz, CDCl<sub>3</sub>)  $\delta$  = 163.75 (d,  $J_{C-F}$  = 250 Hz), 152.95, 135.76, 122.38, 117.3 (d,  $J_{C-F}$  = 25 Hz), 34

**<sup>19</sup>F NMR** (376 MHz, CDCl<sub>3</sub>)  $\delta$  = -109.7

HRMS (ESI)  $m/z$ : [M+H]<sup>+</sup> calculated for C<sub>8</sub>H<sub>7</sub>N<sub>4</sub>FS 210.0375; found 211.0917

### 5-((4-chlorophenyl)thio)-1-methyl-1H-tetrazole

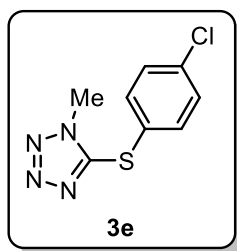

Synthesized following **general procedure A** starting from **1a** (40.6 mg, 0.35 mmol) and **2c-TMP** (181.5 mg, 0.35 mmol). The reaction was stirred for 8 h. The reaction mixture was purified by column chromatography (AcOEt/Hexane: 10/90 → 30/70) to afford **3e** (65 mg, 0.28 mmol, 82%) as white solid.  $R_f$  0.35 (AcOEt/Hexane: 30/70).

$^1\text{H NMR}$  (400 MHz,  $\text{CDCl}_3$ )  $\delta$  = 7.53 (d,  $J=8$  Hz, 2H), 7.41 (d,  $J=8$  Hz, 2H), 3.99 (s, 3H)

$^{13}\text{C NMR}$  (100 MHz,  $\text{CDCl}_3$ )  $\delta$  = 152.0, 134.1, 133.1, 126.7, 124.3, 34.1

HRMS (ESI)  $m/z$ :  $[\text{M}+\text{H}]^+$  calculated for  $\text{C}_8\text{H}_7\text{N}_4\text{SCl}$  226.0080; found 227.0622

### 5-((4-bromophenyl)thio)-1-methyl-1H-tetrazole

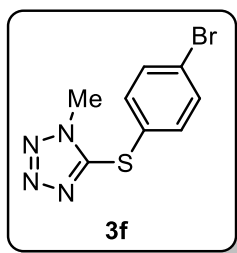

Synthesized following **general procedure A** starting from **1a** (40.6 mg, 0.35 mmol) and **2f-TMP** (197 mg, 0.35 mmol). The reaction was stirred for 8 h. The reaction mixture was purified by column chromatography (AcOEt/Hexane: 10/90 → 30/70) to afford **3f** (76 mg, 0.283 mmol, 81%) as white solid.  $R_f$  0.4 (AcOEt/Hexane: 30/70).

$^1\text{H NMR}$  (400 MHz,  $\text{CDCl}_3$ )  $\delta$  = 7.44 (d,  $J=8$  Hz, 2H), 7.33 (d,  $J=8$  Hz, 2H), 3.95 (s, 3H)

$^{13}\text{C NMR}$  (100 MHz,  $\text{CDCl}_3$ )  $\delta$  = 152.2, 136.2, 134.1, 130.1, 125.9, 34.0

HRMS (ESI)  $m/z$ :  $[\text{M}+\text{H}]^+$  calculated for  $\text{C}_8\text{H}_7\text{N}_4\text{SBr}$  269.9575; found 272.9648

### 5-(mesitylthio)-1-methyl-1*H*-tetrazole

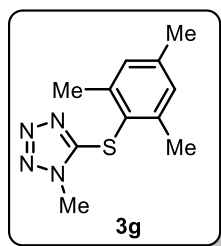

Synthesized following **general procedure A** starting from **1a** (40.6 mg, 0.35 mmol) and **2g-TMP** (184 mg, 0.35 mmol). The reaction was stirred for 8 h. The reaction mixture was purified by column chromatography (AcOEt/Hexane: 10/90 → 30/70) to afford **3g** (53 mg, 0.227 mmol, 65%) as yellowish liquid.  $R_f$  0.45 (AcOEt/Hexane: 30/70).

$^1\text{H NMR}$  (400 MHz,  $\text{CDCl}_3$ )  $\delta$  = 7.00 (s, 2H), 3.93 (s, 3H), 2.39 (s, 6H), 2.28 (s, 3H)

$^{13}\text{C NMR}$  (100 MHz,  $\text{CDCl}_3$ )  $\delta$  = 153.6, 143.2, 141.1, 130.0, 121.6, 33.82, 21.91, 21.16

HRMS (ESI)  $m/z$ :  $[\text{M}+\text{H}]^+$  calculated for  $\text{C}_{11}\text{H}_{14}\text{N}_4\text{S}$  234.0939; found 235.1013

### 5-((2,5-dimethylphenyl)thio)-1-methyl-1*H*-tetrazole

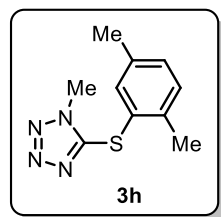

Synthesized following **general procedure A** starting from **1a** (40.6 mg, 0.35 mmol) and **2h-TMP** (179 mg, 0.35 mmol). The reaction was stirred for 8 h. The reaction mixture was purified by column chromatography (AcOEt/Hexane: 10/90 → 30/70) to afford **3h** (55 mg, 0.252 mmol, 72%) as white solid.  $R_f$  0.4 (AcOEt/Hexane: 30/70).

$^1\text{H NMR}$  (400 MHz,  $\text{CDCl}_3$ )  $\delta$  = 7.22 (s, 1H), 7.16 (d,  $J=8$  Hz, 1H), 7.10 (d,  $J=8$  Hz, 1H), 3.91 (s, 3H), 2.36 (s, 3H), 2.25 (s, 3H)

$^{13}\text{C NMR}$  (100 MHz,  $\text{CDCl}_3$ )  $\delta$  = 152.7, 138.0, 137.2, 134.6, 131.1, 126.2, 33.8, 20.8, 20.3

HRMS (ESI)  $m/z$ :  $[\text{M}+\text{H}]^+$  calculated for  $\text{C}_{10}\text{H}_{12}\text{N}_4\text{S}$  220.0783; found 221.0857

### 5-([1,1'-biphenyl]-4-ylthio)-1-methyl-1H-tetrazole

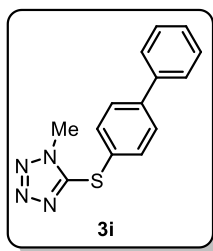

Synthesized following **general procedure A** starting from **1a** (40.6 mg, 0.35 mmol) and **2i-TMP** (196 mg, 0.35 mmol). The reaction was stirred for 8 h. The reaction mixture was purified by column chromatography (AcOEt/Hexane: 10/90 → 30/70) to afford **3i** (61.9 mg, 0.231 mmol, 66%) as white solid.  $R_f$  0.45 (AcOEt /Hexane: 30/70).

$^1\text{H NMR}$  (400 MHz,  $\text{CDCl}_3$ )  $\delta$  = 7.54-7.61 (m, 6H), 7.43 (t,  $J=8$  Hz, 2H), 7.36 (t,  $J=8$  Hz, 2H), 7.10 (d,  $J=8$  Hz, 1H), 3.97 (s, 3H)

$^{13}\text{C NMR}$  (100 MHz,  $\text{CDCl}_3$ )  $\delta$  = 152.5, 142.7, 139.6, 133.0, 129.0, 128.6, 128.1, 127.1, 34.1

HRMS (ESI)  $m/z$ :  $[\text{M}+\text{H}]^+$  calculated for  $\text{C}_{14}\text{H}_{12}\text{N}_4\text{S}$  268.0783; found 269.0859

### 1-methyl-5-((4-nitrophenyl)thio)-1H-tetrazole

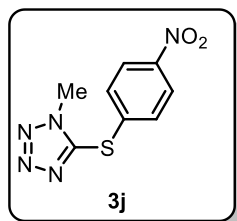

Synthesized following **general procedure A** starting from **1a** (40.6 mg, 0.35 mmol) and **2j-TMP** (185 mg, 0.35 mmol). The reaction was stirred for 10 h. The reaction mixture was purified by column chromatography (AcOEt/Hexane: 10/90 → 30/70) to afford **3j** (61.4 mg, 0.259 mmol, 74%) as brownish solid.  $R_f$  0.2 (AcOEt /Hexane: 30/70).

$^1\text{H NMR}$  (400 MHz,  $\text{CDCl}_3$ )  $\delta$  = 8.23 (d,  $J=8$  Hz, 2H), 7.64 (d,  $J=8$  Hz, 1H), 4.07 (s, 3H)

$^{13}\text{C NMR}$  (100 MHz,  $\text{CDCl}_3$ )  $\delta$  = 150.2, 147.8, 137.0, 131.0, 124.8, 34.2

HRMS (ESI)  $m/z$ :  $[\text{M}+\text{H}]^+$  calculated for  $\text{C}_8\text{H}_7\text{N}_5\text{O}_2\text{S}$  237.0320; found 238.0398

#### 4-((1-methyl-1H-tetrazol-5-yl)thio)benzonitrile

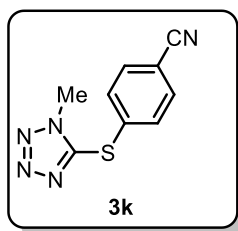

Synthesized following **general procedure A** starting from **1a** (40.6 mg, 0.35 mmol) and **2k-TMP** (178 mg, 0.35 mmol). The reaction was stirred for 10 h. The reaction mixture was purified by column chromatography (AcOEt/Hexane: 10/90 → 30/70) to afford **3k** (54.7 mg, 0.252 mmol, 74%) as white solid.  $R_f$  0.25 (AcOEt/Hexane: 30/70).

$^1\text{H NMR}$  (400 MHz,  $\text{CDCl}_3$ )  $\delta$  = 7.64 (d,  $J=8$  Hz, 2H), 7.55 (d,  $J=8$  Hz, 1H), 4.01 (s, 3H)

$^{13}\text{C NMR}$  (100 MHz,  $\text{CDCl}_3$ )  $\delta$  = 150.4, 134.8, 133.3, 131.2, 117.7, 112.8, 34.2

HRMS (ESI)  $m/z$ :  $[\text{M}+\text{H}]^+$  calculated for  $\text{C}_9\text{H}_7\text{N}_5\text{S}$  217.0422; found 218.0499

#### 1-(4-((1-methyl-1H-tetrazol-5-yl)thio)phenyl)ethan-1-one

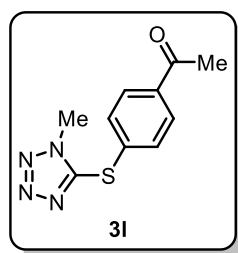

Synthesized following **general procedure A** starting from **1a** (40.6 mg, 0.35 mmol) and **2l-TMP** (184 mg, 0.35 mmol). The reaction was stirred for 10 h. The reaction mixture was purified by column chromatography (AcOEt/Hexane: 10/90 → 30/70) to afford **3l** (59 mg, 0.252 mmol, 72%) as white solid.  $R_f$  0.25 (AcOEt/Hexane: 30/70).

$^1\text{H NMR}$  (400 MHz,  $\text{CDCl}_3$ )  $\delta$  = 7.91 (d,  $J=8$  Hz, 2H), 7.50 (d,  $J=8$  Hz, 1H), 3.98 (s, 3H), 2.56 (s, 3H)

$^{13}\text{C NMR}$  (100 MHz,  $\text{CDCl}_3$ )  $\delta$  = 150.9, 137.2, 134.2, 130.9, 129.6, 34.3, 26.7

HRMS (ESI)  $m/z$ :  $[\text{M}+\text{H}]^+$  calculated for  $\text{C}_{10}\text{H}_{10}\text{N}_4\text{OS}$  234.0575; found 235.0835



### 5-((4-methoxyphenyl)thio)-1-methyl-1*H*-tetrazole

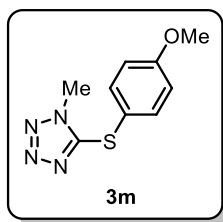

Synthesized following **general procedure A** starting from **1a** (40.6 mg, 0.35 mmol) and **2i-An** (171 mg, 0.35 mmol). The reaction was stirred for 8 h. The reaction mixture was purified by column chromatography (AcOEt/Hexane: 10/90 → 30/70) to afford **3m** (68.5 mg, 0.308 mmol, 88%) as yellowish liquid.  $R_f$  0.25 (AcOEt /Hexane: 30/70).

**$^1\text{H NMR}$**  (400 MHz,  $\text{CDCl}_3$ )  $\delta$  = 7.48 (d,  $J=8$  Hz, 2H), 6.89 (d,  $J=8$  Hz, 1H), 3.91 (s, 3H), 3.78 (s, 3H)

**$^{13}\text{C NMR}$**  (100 MHz,  $\text{CDCl}_3$ )  $\delta$  = 161.2, 153.8, 135.7, 117.0, 115.6, 55.5, 33.8

HRMS (ESI)  $m/z$ :  $[\text{M}+\text{H}]^+$  calculated for  $\text{C}_9\text{H}_{10}\text{N}_4\text{OS}$  222.0575; found 223.0851

### 1-methyl-5-((4-(trifluoromethoxy)phenyl)thio)-1*H*-tetrazole

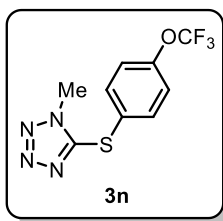

Synthesized following **general procedure A** starting from **1a** (40.6 mg, 0.35 mmol) and **2m-An** (198 mg, 0.35 mmol). The reaction was stirred for 8 h. The reaction mixture was purified by column chromatography (AcOEt/Hexane: 10/90 → 30/70) to afford **3n** (71.4 mg, 0.259 mmol, 74%) as colourless oil.  $R_f$  0.35 (AcOEt /Hexane: 30/70).

**$^1\text{H NMR}$**  (400 MHz,  $\text{CDCl}_3$ )  $\delta$  = 7.58 (d,  $J=8$  Hz, 2H), 7.23 (d,  $J=8$  Hz, 1H), 3.99 (s, 3H)

**$^{13}\text{C NMR}$**  (100 MHz,  $\text{CDCl}_3$ )  $\delta$  = 152.2, 150.2, 134.4, 125.9, 122.2, 121.6, 119.0, 34.0

**$^{19}\text{F NMR}$**  (376 MHz,  $\text{CDCl}_3$ )  $\delta$  = -58.2

HRMS (ESI)  $m/z$ :  $[\text{M}+\text{H}]^+$  calculated for  $\text{C}_9\text{H}_7\text{N}_4\text{OF}_3\text{S}$  276.0293; found 277.0368

**1-methyl-5-((4-(trifluoromethyl)phenyl)thio)-1H-tetrazole**

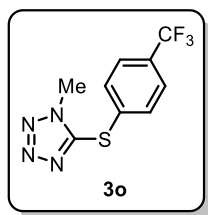

Synthesized following **general procedure A** starting from **1a** (40.6 mg, 0.35 mmol) and **2n-An** (193 mg, 0.35 mmol). The reaction was stirred for 8 h. The reaction mixture was purified by column chromatography (AcOEt/Hexane: 10/90 → 30/70) to afford **3o** (74.6 mg, 0.287 mmol, 82%) as colourless oil.  $R_f$  0.4 (AcOEt /Hexane: 30/70).

$^1\text{H NMR}$  (400 MHz,  $\text{CDCl}_3$ )  $\delta$  = 7.62 (d,  $J=8$  Hz, 2H), 7.58 (d,  $J=8$  Hz, 1H), 4.00 (s, 3H)

$^{13}\text{C NMR}$  (100 MHz,  $\text{CDCl}_3$ )  $\delta$  = 151.1, 132.9, 131.6, 131.5, 127.6, 126.8, 124.9, 122.2, 34.3

$^{19}\text{F NMR}$  (376 MHz,  $\text{CDCl}_3$ )  $\delta$  = -62.5

HRMS (ESI)  $m/z$ :  $[\text{M}+\text{H}]^+$  calculated for  $\text{C}_9\text{H}_7\text{N}_4\text{F}_3\text{S}$  260.0344; found 261.0419

**5-((3,5-bis(trifluoromethyl)phenyl)thio)-1-methyl-1H-tetrazole**

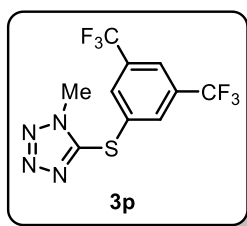

Synthesized following **general procedure A** starting from **1a** (40.6 mg, 0.35 mmol) and **2o-TMP** (217 mg, 0.35 mmol). The reaction was stirred for 10 h. The reaction mixture was purified by column chromatography (AcOEt/Hexane: 10/90 → 30/70) to afford **3p** (75 mg, 0.227 mmol, 65%) as white solid.  $R_f$  0.35 (AcOEt /Hexane: 30/70).

$^1\text{H NMR}$  (400 MHz,  $\text{CDCl}_3$ )  $\delta$  = 8.02 (s, 2H), 7.90 (s, 1H), 4.07 (s, 3H)

$^{13}\text{C NMR}$  (100 MHz,  $\text{CDCl}_3$ )  $\delta$  = 150.8, 133.7, 133.4, 133.0, 132.7, 132.2, 131.1, 126.6, 123.9, 123.4, 121.2, 118.5, 34.1

$^{19}\text{F NMR}$  (376 MHz,  $\text{CDCl}_3$ )  $\delta$  = -62.9

HRMS (ESI)  $m/z$ :  $[\text{M}+\text{H}]^+$  calculated for  $\text{C}_{10}\text{H}_6\text{N}_4\text{F}_6\text{S}$  328.0217; found 329.0878

**1-methyl-5-((3-nitrophenyl)thio)-1H-tetrazole**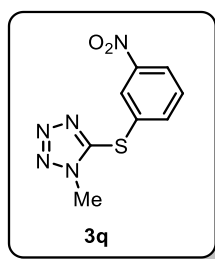

Synthesized following **general procedure A** starting from **1a** (40.6 mg, 0.35 mmol) and **2p-TMP** (285 mg, 0.35 mmol). The reaction was stirred for 10 h. The reaction mixture was purified by column chromatography (AcOEt/Hexane: 10/90 → 30/70) to afford **3p** (62 mg, 0.262 mmol, 75%) as yellowish oil.  $R_f$  0.25 (AcOEt /Hexane: 30/70).

**$^1\text{H NMR}$**  (400 MHz,  $\text{CDCl}_3$ )  $\delta$  = 8.38 (t,  $J$  = 2.2 Hz, 1H), 8.21 (dq,  $J$  = 8 and 1 Hz, 1H), 7.86 (dq,  $J$  = 8 and 1 Hz, 1H), 7.60 (t,  $J$  = 8 Hz, 1H), 4.04 (s, 3H)

**$^{13}\text{C NMR}$**  (100 MHz,  $\text{CDCl}_3$ )  $\delta$  = 151.3, 148.7, 138.2, 130.9, 130.1, 127.0, 124.4, 34.2

HRMS (ESI)  $m/z$ :  $[\text{M}+\text{H}]^+$  calculated for  $\text{C}_8\text{H}_7\text{N}_5\text{O}_2\text{S}$  237.0320; found 238.0401

**5-((4-(tert-butyl)phenyl)thio)-1-methyl-1H-tetrazole**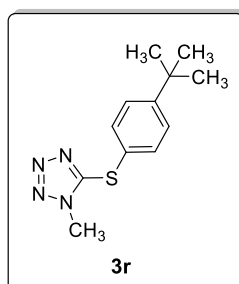

Synthesized following **general procedure A** starting from **1a** (58 mg, 0.5 mmol) and **2d-OTf** (244 mg, 0.5 mmol). The reaction was stirred for 10 h. The reaction mixture was purified by column chromatography (AcOEt/Hexane: 10/90 → 30/70) to afford **3r** (59 mg, 0.24 mmol, 48%) as colourless oil.  $R_f$  0.25 (AcOEt /Hexane: 30/70).

**$^1\text{H NMR}$**  (400 MHz,  $\text{CDCl}_3$ )  $\delta$  = 7.47 (d,  $J$  = 8 Hz, 2H), 7.41 (d,  $J$  = 8 Hz, 2H), 3.96 (s, 3H), 1.31 (s, 9H)

**$^{13}\text{C NMR}$**  (100 MHz,  $\text{CDCl}_3$ )  $\delta$  = 153.2, 152.9, 132.7, 129.5, 127.0, 123.8, 120.2, 115.4, 34.8, 34.1, 31.1

HRMS (ESI)  $m/z$ :  $[\text{M}+\text{H}]^+$  calculated for  $\text{C}_{12}\text{H}_{16}\text{N}_4\text{S}$  248.1096; found 249.1565

**1-methyl-5-(thiophen-2-ylthio)-1H-tetrazole**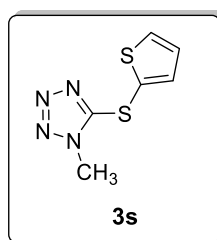

Synthesized following **general procedure A** starting from **1a** (58 mg, 0.5 mmol) and **2f-OTf** (218 mg, 0.5 mmol). The reaction was stirred for 10 h. The reaction mixture was purified by column chromatography (AcOEt/Hexane: 10/90 → 30/70) to afford **3s** (24 mg, 0.12 mmol, 24%) as black oil.  $R_f$  0.25 (AcOEt /Hexane: 30/70).

**$^1\text{H}$  NMR** (400 MHz,  $\text{CDCl}_3$ )  $\delta$  = 7.56 (dd,  $J$  = 8 & 1 Hz, 1H), 7.45 (dd,  $J$  = 8 & 1 Hz, 1H), 7.10 (dd,  $J$  = 8 & 1 Hz, 1H), 4.04 (s, 3H)

**$^{13}\text{C}$  NMR** (100 MHz,  $\text{CDCl}_3$ )  $\delta$  = 152.7, 137.5, 133.0, 128.2, 122.9, 115.4, 34.1

HRMS (ESI)  $m/z$ :  $[\text{M}+\text{H}]^+$  calculated for  $\text{C}_6\text{H}_6\text{N}_4\text{S}_2$  198.0034; found 200.0472

**1-phenyl-5-(phenylthio)-1H-tetrazole**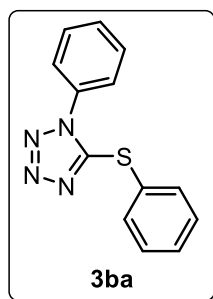

Synthesized following **general procedure A** starting from **1b** (44.5 mg, 0.25 mmol) and **2a-OTf** (121 mg, 0.25 mmol). The reaction was stirred for 6 h. The reaction mixture was purified by column chromatography (AcOEt/Hexane: 10/90 → 30/70) to afford **3ba** (48 mg, 0.190 mmol, 75%) as white solid.  $R_f$  0.5 (AcOEt /Hexane: 30/70).

**$^1\text{H}$  NMR** (400 MHz,  $\text{CDCl}_3$ )  $\delta$  = 7.54-7.58 (m, 7H), 7.37-7.43 (m, 3H)

**$^{13}\text{C}$  NMR** (100 MHz,  $\text{CDCl}_3$ )  $\delta$  = 153.7, 134.0, 133.6, 130.4, 126.8, 124.5

HRMS (ESI)  $m/z$ :  $[\text{M}+\text{H}]^+$  calculated for  $\text{C}_{13}\text{H}_{10}\text{N}_4\text{S}$  254.0626; found 255.1227

### 5-((4-bromophenyl)thio)-1-phenyl-1H-tetrazole

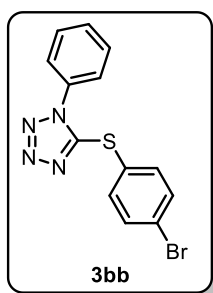

Synthesized following **general procedure A** starting from **1b** (44.5 mg, 0.25 mmol) and **2f-TMP-TFA** (141 mg, 0.25 mmol). The reaction was stirred for 8 h. The reaction mixture was purified by column chromatography (AcOEt/Hexane: 10/90 → 30/70) to afford **3bb** (59 mg, 0.18 mmol, 72%) as yellow solid.  $R_f$  0.5 (AcOEt/Hexane: 30/70).

$^1\text{H NMR}$  (400 MHz,  $\text{CDCl}_3$ )  $\delta$  = 7.50-7.55 (m, 7H), 7.42 (d,  $J=8$  Hz, 2H)

$^{13}\text{C NMR}$  (100 MHz,  $\text{CDCl}_3$ )  $\delta$  = 153.2, 135.6, 133.5, 133.1, 130.6, 129.9, 125.8, 125.0, 124.5

HRMS (ESI)  $m/z$ :  $[\text{M}+\text{H}]^+$  calculated for  $\text{C}_{13}\text{H}_9\text{N}_4\text{BrS}$  331.9731; found 332.9808

### 4-((1-phenyl-1H-tetrazol-5-yl)thio)benzotrile

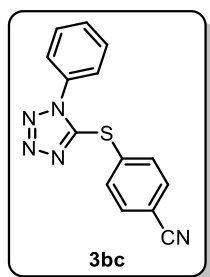

Synthesized following **general procedure A** starting from **1b** (44.5 mg, 0.25 mmol) and **2k-TMP-TFA** (127 mg, 0.25 mmol). The reaction was stirred for 8 h. The reaction mixture was purified by column chromatography (AcOEt/Hexane: 10/90 → 30/70) to afford **3bc** (45.3 mg, 0.162 mmol, 65%) as off-white solid.  $R_f$  0.45 (AcOEt/Hexane: 30/70).

$^1\text{H NMR}$  (400 MHz,  $\text{CDCl}_3$ )  $\delta$  = 7.64 (m, 5H), 7.54-7.58 (m, 4H)

$^{13}\text{C NMR}$  (100 MHz,  $\text{CDCl}_3$ )  $\delta$  = 151.6, 133.8, 133.1, 133.0, 130.9, 124.5, 117.8, 113.4

HRMS (ESI)  $m/z$ :  $[\text{M}+\text{H}]^+$  calculated for  $\text{C}_{14}\text{H}_9\text{N}_5\text{S}$  279.0579; found 280.0652

**1-cyclohexyl-5-(phenylthio)-1H-tetrazole**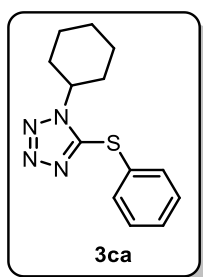

Synthesized following **general procedure A** starting from **1c** (46 mg, 0.25 mmol) and **2a-TMP-TFA** (121 mg, 0.25 mmol). The reaction was stirred for 8 h. The reaction mixture was purified by column chromatography (AcOEt/Hexane: 10/90 → 30/70) to afford **3ca** (40 mg, 0.155 mmol, 62%) as yellowish liquid.  $R_f$  0.5 (AcOEt /Hexane: 30/70).

$^1\text{H NMR}$  (400 MHz,  $\text{CDCl}_3$ )  $\delta$  = 7.51-7.54 (m, 2H), 7.38-7.40 (m, 3H), 1.90-1.93 (m, 6H), 1.28-1.39 (m, 4H)

$^{13}\text{C NMR}$  (100 MHz,  $\text{CDCl}_3$ )  $\delta$  = 151.1, 132.6, 129.9, 129.5, 128.4, 58.6, 32.4, 25.3, 24.8

HRMS (ESI)  $m/z$ :  $[\text{M}+\text{H}]^+$  calculated for  $\text{C}_{13}\text{H}_{16}\text{N}_4\text{S}$  260.1096; found 261.1117

**1-benzyl-5-(phenylthio)-1H-tetrazole**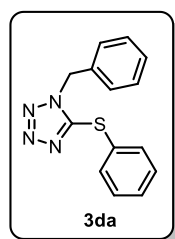

Synthesized following **general procedure A** starting from **1d** (48 mg, 0.25 mmol) and **2a-TMP-TFA** (121 mg, 0.25 mmol). The reaction was stirred for 8 h. The reaction mixture was purified by column chromatography (AcOEt/Hexane: 10/90 → 0/70) to afford **3da** (44.2 mg, 0.165 mmol, 66%) as yellowish liquid.  $R_f$  0.5 (AcOEt /Hexane: 30/70).

$^1\text{H NMR}$  (400 MHz,  $\text{CDCl}_3$ )  $\delta$  = 7.43-7.46 (m, 2H), 7.32-7.35 (m, 6H), 7.22-7.24 (m, 2H), 5.50 (s, 2H)

$^{13}\text{C NMR}$  (100 MHz,  $\text{CDCl}_3$ )  $\delta$  = 152.4, 133.0, 132.7, 129.9, 129.6, 129.18, 129.06, 128.1, 127.8, 51.4

HRMS (ESI)  $m/z$ :  $[\text{M}+\text{H}]^+$  calculated for  $\text{C}_{14}\text{H}_{12}\text{N}_4\text{S}$  268.0763; found 269.0655

**5-(phenylthio)-1-(*p*-tolyl)-1*H*-tetrazole**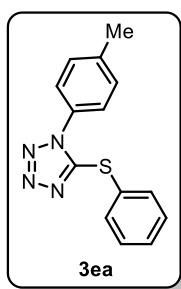

Synthesized following **general procedure A** starting from **1d** (48 mg, 0.25 mmol) and **2a-TMP-TFA** (121 mg, 0.25 mmol). The reaction was stirred for 8 h. The reaction mixture was purified by column chromatography (AcOEt/Hexane: 10/90  $\rightarrow$  20/80) to afford **3ea** (55 mg, 0.205 mmol, 82%) as white solid.  $R_f$  0.45 (AcOEt /Hexane: 30/70).

$^1\text{H NMR}$  (400 MHz,  $\text{CDCl}_3$ )  $\delta$  = 7.57 (d,  $J$  = 8 Hz, 2H), 7.35-7.43 (m, 7H), 2.46 (s, 3H)

$^{13}\text{C NMR}$  (100 MHz,  $\text{CDCl}_3$ )  $\delta$  = 153.6, 140.9, 134.0, 131.1, 130.3, 129.8, 127.0, 21.4

HRMS (ESI)  $m/z$ :  $[\text{M}+\text{H}]^+$  calculated for  $\text{C}_{14}\text{H}_{12}\text{N}_4\text{S}$  268.0763; found 269.1367

**2-(phenylthio)-1*H*-imidazole**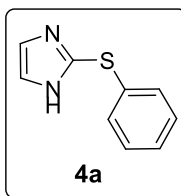

Synthesized following **general procedure A** starting from 1*H*-imidazole-2-thiol (35 mg, 0.35 mmol) and **2a-TMP** (170 mg, 0.35 mmol). The reaction was stirred for 10 h. The reaction mixture was purified by column chromatography (AcOEt/Hexane: 5/98  $\rightarrow$  20/95) to afford **4a** (42 mg, 0.238 mmol, 68%) as white solid.  $R_f$  0.25 (AcOEt /Hexane: 10/90).

$^1\text{H NMR}$  (600 MHz,  $\text{DMSO}-d_6$ )  $\delta$  = 7.03 (t,  $J$  = 8 Hz, 2H), 6.91-6.95 (m, 3H), 6.83 (d,  $J$  = 8 Hz, 2H)

$^{13}\text{C NMR}$  (150 MHz,  $\text{DMSO}-d_6$ )  $\delta$  = 134.9, 133.6, 128.3, 126.3, 125.4

HRMS (ESI)  $m/z$ :  $[\text{M}+\text{H}]^+$  calculated for  $\text{C}_9\text{H}_8\text{N}_2\text{S}$  176.0408; found 177.0862

**5-methoxy-2-(phenylthio)-1H-benzo[d]imidazole**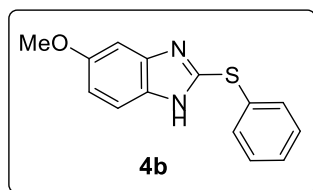

Synthesized following **general procedure A** starting from 5-methoxy-1H-benzo[d]imidazole-2-thiol (63 mg, 0.35 mmol) and **2a-TMP** (170 mg, 0.35 mmol). The reaction was stirred for 10 h. The reaction mixture was purified by column chromatography (AcOEt/Hexane: 5/98 → 20/95) to afford **4b** (64 mg, 0.252 mmol, 72%) as yellow solid.  $R_f$  0.3 (AcOEt/Hexane: 10/90).

$^1\text{H NMR}$  (400 MHz,  $\text{CDCl}_3$ )  $\delta$  = 7.42-7.45 (m, 2H), 7.38 (d,  $J$  = 8 Hz, 1H), 7.21-7.23 (m, 3H), 6.76 (d,  $J$  = 4 Hz, 1H), 6.83 (q,  $J$  = 8 Hz, 1H), 3.75 (s, 3H)

$^{13}\text{C NMR}$  (100 MHz,  $\text{CDCl}_3$ )  $\delta$  = 156.5, 147.1, 139.3, 134.4, 132.2, 131.0, 129.6, 128.5, 115.8, 112.3, 97.1, 55.8

HRMS (ESI)  $m/z$ :  $[\text{M}+\text{H}]^+$  calculated for  $\text{C}_{14}\text{H}_{12}\text{N}_2\text{OS}$  256.0670; found 257.1184

**2-(phenylthio)-4,5-dihydrothiazole<sup>17</sup>**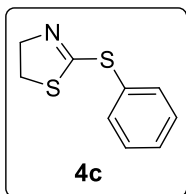

Synthesized following **general procedure A** starting from 4,5-dihydrothiazole-2-thiol (38.9 mg, 0.35 mmol) and **2a-TMP** (170 mg, 0.35 mmol). The reaction was stirred for 10 h. The reaction mixture was purified by column chromatography (AcOEt/Hexane: 5/98 → 10/95) to afford **4c** (52 mg, 0.266 mmol, 76%) as colourless liquid.  $R_f$  0.4 (AcOEt/Hexane: 10/90).

$^1\text{H NMR}$  (400 MHz,  $\text{CDCl}_3$ )  $\delta$  = 7.63-7.65 (m, 2H), 7.40-7.44 (m, 3H), 4.26 (t,  $J$  = 8 Hz, 2H), 3.30 (t,  $J$  = 8 Hz, 2H)

$^{13}\text{C NMR}$  (100 MHz,  $\text{CDCl}_3$ )  $\delta$  = 167.7, 135.6, 130.0, 129.2, 65.4, 35.0

HRMS (ESI)  $m/z$ :  $[\text{M}+\text{H}]^+$  calculated for  $\text{C}_{11}\text{H}_9\text{NS}$  196.0176; found 196.0710



**2-(phenylthio)benzo[*d*]thiazole**<sup>17</sup>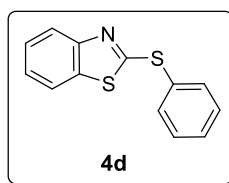

Synthesized following **general procedure A** starting from benzo[*d*]thiazole-2-thiol (58.5 mg, 0.35 mmol) and **2a-TMP** (170 mg, 0.35 mmol). The reaction was stirred for 10 h. The reaction mixture was purified by column chromatography (AcOEt/Hexane: 5/98 → 10/95) to afford **4d** (75.8 mg, 0.3115 mmol, 89%) as colourless liquid.  $R_f$  0.5 (AcOEt /Hexane: 10/90).

**<sup>1</sup>H NMR** (400 MHz, CDCl<sub>3</sub>)  $\delta$  = 7.88 (d,  $J$ = 8 Hz, 1H), 7.73 (d,  $J$ = 8 Hz, 2H), 7.64 (d,  $J$ = 8 Hz, 1H), 7.41-7.49 (m, 3H) 7.40 (t,  $J$ = 8 Hz, 1H), 7.26 (t,  $J$ = 8 Hz, 1H)

**<sup>13</sup>C NMR** (100 MHz, CDCl<sub>3</sub>)  $\delta$  = 169.7, 153.9, 135.5, 135.4, 130.5, 129.9, 126.2, 124.3, 121.9, 120.8

HRMS (ESI)  $m/z$ : [M+H]<sup>+</sup> calculated for C<sub>13</sub>H<sub>9</sub>NS<sub>2</sub> 243.0176; found 244.0624

**2-(phenylthio)pyrimidine**<sup>17</sup>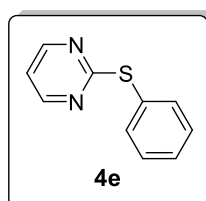

Synthesized following **general procedure A** starting from pyrimidine-2-thiol (40 mg, 0.35 mmol) and **2a-TMP** (170 mg, 0.35 mmol). The reaction was stirred for 10 h. The reaction mixture was purified by column chromatography (AcOEt/Hexane: 5/98 → 10/95) to afford **4e** (50.7 mg, 0.269 mmol, 77%) as yellow liquid.  $R_f$  0.5 (AcOEt /Hexane: 10/90).

**<sup>1</sup>H NMR** (400 MHz, CDCl<sub>3</sub>)  $\delta$  = 8.48 (d,  $J$ = 8 Hz, 2H), 7.62-7.65 (m, 2H), 7.45 (t,  $J$ = 4 Hz, 1H), 6.95 (t,  $J$ = 4 Hz, 1H)

**<sup>13</sup>C NMR** (100 MHz, CDCl<sub>3</sub>)  $\delta$  = 172.8, 157.6, 135.3, 129.3, 117.0

HRMS (ESI)  $m/z$ : [M+H]<sup>+</sup> calculated for C<sub>10</sub>H<sub>8</sub>N<sub>2</sub>S 188.0408; found 189.0922

**3-(phenylthio)-1H-1,2,4-triazole<sup>17</sup>**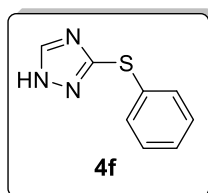

Synthesized following **general procedure A** starting from pyrimidine-2-thiol (40 mg, 0.35 mmol) and **2a-TMP** (170 mg, 0.35 mmol). The reaction was stirred for 10 h. The reaction mixture was purified by column chromatography (AcOEt/Hexane: 5/98 → 10/95) to afford **4f** (44 mg, 0.245 mmol, 70%) as colourless liquid.  $R_f$  0.5 (AcOEt /Hexane: 10/90).

<sup>1</sup>H NMR (400 MHz, CDCl<sub>3</sub>)  $\delta$  = 8.04 (s, 1H), 7.52-7.53 (m, 2H), 7.34-7.37 (m, 3H)

<sup>13</sup>C NMR (100 MHz, CDCl<sub>3</sub>)  $\delta$  = 156.3, 147.4, 132.5, 130.4, 129.6, 128.7, 125.1

HRMS (ESI)  $m/z$ : [M+H]<sup>+</sup> calculated for C<sub>8</sub>H<sub>7</sub>N<sub>3</sub>S 177.0361; found 178.0844

**2-(phenylthio)pyridine<sup>17</sup>**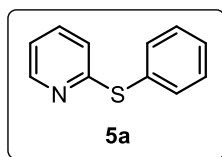

Synthesized following **general procedure B** starting from 2-mercaptopyridine (38.9 mg, 0.35 mmol) and **2a-An** (161 mg, 0.35 mmol). The reaction was stirred for 2 h. The reaction mixture was purified by column chromatography (AcOEt/Hexane: 2/98 → 5/95) to afford **5a** (49 mg, 0.262 mmol, 75%) as colourless liquid.  $R_f$  0.5 (AcOEt /Hexane: 10/90).

<sup>1</sup>H NMR (400 MHz, CDCl<sub>3</sub>)  $\delta$  = 8.39-8.41 (m, 1H), 7.56-7.59 (m, 2H), 7.39-7.45 (m, 4H), 6.95-6.98 (m, 1H), 6.87 (dt,  $J$  = 8 Hz, 1H)

<sup>13</sup>C NMR (100 MHz, CDCl<sub>3</sub>)  $\delta$  = 161.6, 149.6, 136.8, 135.0, 131.1, 129.7, 129.2, 121.4, 120.02

HRMS (ESI)  $m/z$ : [M+H]<sup>+</sup> calculated for C<sub>11</sub>H<sub>9</sub>NS 187.0456; found 188.0989

**2-(*p*-tolylthio)pyridine<sup>18</sup>**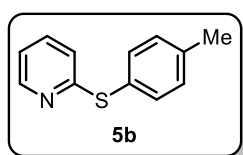

Synthesized following **general procedure B** starting from 2-mercaptopyridine (38.9 mg, 0.35 mmol) and **2b-An** (166 mg, 0.35 mmol). The reaction was stirred for 2 h. The reaction mixture was purified by column chromatography (AcOEt/Hexane: 2/98 → 5/95) to afford **5b** (57.8 mg, 0.287 mmol, 82%) as white solid.  $R_f$  0.5 (AcOEt /Hexane: 10/90).

$^1\text{H NMR}$  (400 MHz,  $\text{CDCl}_3$ )  $\delta$  = 8.40 (d,  $J$ = 8 Hz, 1H), 7.47 (d,  $J$ = 8 Hz, 2H), 7.41 (dt,  $J$ = 8 & 1 Hz, 1H), 7.22 (d,  $J$ = 8 Hz, 2H), 6.95 (dq,  $J$ = 5 & 1 Hz, 1H), 6.82 (t,  $J$ = 8 Hz, 1H), 2.38 (s, 3H)

$^{13}\text{C NMR}$  (100 MHz,  $\text{CDCl}_3$ )  $\delta$  = 162.3, 149.6, 139.5, 136.7, 135.3, 130.6, 127.3, 120.9, 119.6, 21.3

HRMS (ESI)  $m/z$ :  $[\text{M}+\text{H}]^+$  calculated for  $\text{C}_{12}\text{H}_{11}\text{NS}$  201.0612; found 202.0758

### 2-(*o*-tolylthio)pyridine<sup>17</sup>

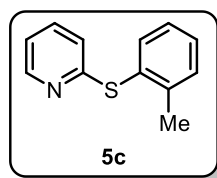

Synthesized following **general procedure B** starting from 2-mercaptopyridine (38.9 mg, 0.35 mmol) and **2b-An** (166 mg, 0.35 mmol). The reaction was stirred for 3 h. The reaction mixture was purified by column chromatography (AcOEt/Hexane: 2/98 → 5/95) to afford **5c** (57.8 mg, 0.287 mmol, 72%) as colourless liquid.  $R_f$  0.5 (AcOEt /Hexane: 10/90).

$^1\text{H NMR}$  (400 MHz,  $\text{CDCl}_3$ )  $\delta$  = 8.40 (d,  $J$ = 8 Hz, 1H), 7.59 (d,  $J$ = 8 Hz, 1H), 7.39 (dt,  $J$ = 8 & 1 Hz, 1H), 7.33-7.34 (m, 2H), 7.21-7.25 (m, 1H), 6.95 (dq,  $J$ = 5 & 1 Hz, 1H), 6.82 (t,  $J$ = 8 Hz, 1H), 2.39 (s, 3H)

$^{13}\text{C NMR}$  (100 MHz,  $\text{CDCl}_3$ )  $\delta$  = 161.3, 149.7, 142.8, 136.8, 131.1, 129.9, 127.2, 120.4, 119.6, 20.9

HRMS (ESI)  $m/z$ :  $[\text{M}+\text{H}]^+$  calculated for  $\text{C}_{12}\text{H}_{11}\text{NS}$  201.0612; found 202.0758

### 2-((4-bromophenyl)thio)pyridine<sup>18</sup>

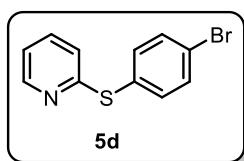

Synthesized following **general procedure B** starting from 2-mercaptopyridine (38.9 mg, 0.35 mmol) and **2b-An** (188.6 mg, 0.35 mmol). The reaction was stirred for 3 h. The reaction

mixture was purified by column chromatography (AcOEt/Hexane: 2/98 → 5/95) to afford **5d** (72.6 mg, 0.273 mmol, 78%) as yellow solid.  $R_f$  0.5 (AcOEt /Hexane: 10/90).

$^1\text{H NMR}$  (400 MHz,  $\text{CDCl}_3$ )  $\delta$  = 8.41 (d,  $J$  = 8 Hz, 1H), 7.42-7.54 (m, 5H), 7.01 (dq,  $J$  = 5 & 1 Hz, 1H), 6.84 (t,  $J$  = 8 Hz, 1H)

$^{13}\text{C NMR}$  (100 MHz,  $\text{CDCl}_3$ )  $\delta$  = 160.4, 149.8, 136.9, 136.3, 132.8, 130.4, 123.5, 121.8, 120.4

HRMS (ESI)  $m/z$ :  $[\text{M}+\text{H}]^+$  calculated for  $\text{C}_{11}\text{H}_8\text{NSBr}$  264.9561; found 266.0168

## 2-(mesitylthio)pyridine

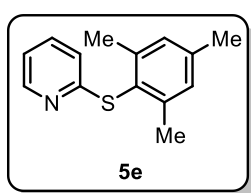

Synthesized following **general procedure B** starting from 2-mercaptopyridine (38.9 mg, 0.35 mmol) and **2b-An** (175.8 mg, 0.35 mmol). The reaction was stirred for 3 h. The reaction mixture was purified by column chromatography (AcOEt/Hexane: 2/98 → 5/95) to afford **5e** (57.8 mg, 0.287 mmol, 72%) as light-yellow liquid.  $R_f$  0.6 (AcOEt /Hexane: 10/90).

$^1\text{H NMR}$  (400 MHz,  $\text{CDCl}_3$ )  $\delta$  = 8.38 (d,  $J$  = 8 Hz, 1H), 7.33-7.37 (m, 1H), 7.01 (s, 2H), 6.90-6.93 (m, 1H), 6.53 (d,  $J$  = 8 Hz, 1H), 2.38 (s, 6H), 2.31 (s, 3H)

$^{13}\text{C NMR}$  (100 MHz,  $\text{CDCl}_3$ )  $\delta$  = 161.6, 149.6, 143.8, 139.8, 136.7, 129.5, 125.8, 119.0, 21.7, 21.4

HRMS (ESI)  $m/z$ :  $[\text{M}+\text{H}]^+$  calculated for  $\text{C}_{14}\text{H}_{15}\text{NS}$  229.0925; found 230.0946

## 2-((4-nitrophenyl)thio)pyridine<sup>17</sup>

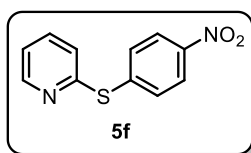

Synthesized following **general procedure B** starting from 2-mercaptopyridine (38.9 mg, 0.35 mmol) and **2f-An** (176 mg, 0.35 mmol). The reaction was stirred for 3 h. The reaction mixture was purified by column chromatography (AcOEt/Hexane: 2/98 → 10/90) to afford **5f** (71.5 mg, 0.308 mmol, 88%) as yellow solid.  $R_f$  0.3 (AcOEt /Hexane: 10/90).

$^1\text{H NMR}$  (400 MHz,  $\text{CDCl}_3$ )  $\delta$  = 8.50 (d,  $J$  = 8 Hz, 1H), 8.16 (d,  $J$  = 8 Hz, 2H), 7.58 (d,  $J$  = 8 Hz, 2H), 7.29 (d,  $J$  = 8 Hz, 1H), 7.15-7.19 (m, 1H)

$^{13}\text{C NMR}$  (100 MHz,  $\text{CDCl}_3$ )  $\delta$  = 156.6, 150.5, 147.0, 142.5, 137.5, 131.9, 125.0, 124.2, 122.1

HRMS (ESI)  $m/z$ :  $[\text{M}+\text{H}]^+$  calculated for  $\text{C}_{14}\text{H}_{15}\text{NS}$  232.0306; found 233.0462

#### 4-(pyridin-2-ylthio)benzonitrile<sup>17</sup>

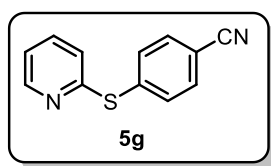

Synthesized following **general procedure B** starting from 2-mercaptopyridine (38.9 mg, 0.35 mmol) and **2g-An** (169 mg, 0.35 mmol). The reaction was stirred for 3 h. The reaction mixture was purified by column chromatography (AcOEt/Hexane: 2/98  $\rightarrow$  10/90) to afford **5g** (61.6 mg, 0.308 mmol, 83%) as colourless liquid.  $R_f$  0.35 (AcOEt /Hexane: 10/90).

$^1\text{H NMR}$  (400 MHz,  $\text{CDCl}_3$ )  $\delta$  = 8.47 (d,  $J$  = 8 Hz, 1H), 7.53-7.61 (m, 5H), 7.21 (d,  $J$  = 8 Hz, 1H), 7.11-7.15 (m, 1H)

$^{13}\text{C NMR}$  (100 MHz,  $\text{CDCl}_3$ )  $\delta$  = 150.4, 139.7, 137.4, 132.7, 132.5, 124.5, 121.8, 118.5, 11.3

HRMS (ESI)  $m/z$ :  $[\text{M}+\text{H}]^+$  calculated for  $\text{C}_{12}\text{H}_8\text{N}_2\text{S}$  212.0408; found 213.0408

#### 2-((4-(trifluoromethyl)phenyl)thio)pyridine<sup>18</sup>

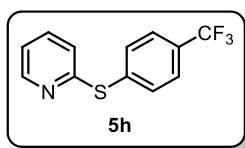

Synthesized following **general procedure B** starting from 2-mercaptopyridine (38.9 mg, 0.35 mmol) and **2h-An** (184 mg, 0.35 mmol). The reaction was stirred for 3 h. The reaction mixture was purified by column chromatography (AcOEt/Hexane: 2/98  $\rightarrow$  5/95) to afford **5h** (69.6 mg, 0.273 mmol, 78%) as colourless liquid.  $R_f$  0.5 (AcOEt /Hexane: 10/90).

$^1\text{H NMR}$  (400 MHz,  $\text{CDCl}_3$ )  $\delta$  = 8.45 (d,  $J$  = 8 Hz, 1H), 7.60-7.65 (m, 4H), 7.53 (t,  $J$  = 8 Hz, 1H), 7.06-7.10 (m, 1H)

$^{13}\text{C NMR}$  (100 MHz,  $\text{CDCl}_3$ )  $\delta$  = 158.8, 150.1, 137.1, 133.6, 130.4 (q,  $J_{\text{C-F}}$  = 40 Hz), 129.9, 126.2, 125.3, 123.1, 122.6, 121.1

$^{19}\text{F}$  NMR (376 MHz,  $\text{CDCl}_3$ )  $\delta = -61.7$

HRMS (ESI)  $m/z$ :  $[\text{M}+\text{H}]^+$  calculated for  $\text{C}_{12}\text{H}_8\text{NSF}_3$  255.0330; found 258.0262

### 2-((4-methoxyphenyl)thio)pyridine<sup>18</sup>

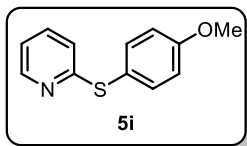

Synthesized following **general procedure B** starting from 2-mercaptopyridine (38.9 mg, 0.35 mmol) and **2i-An** (171 mg, 0.35 mmol). The reaction was stirred for 3 h. The reaction mixture was purified by column chromatography (AcOEt/Hexane: 2/98  $\rightarrow$  10/90) to afford **5i** (49 mg, 0.227 mmol, 65%) as colourless liquid.  $R_f$  0.35 (AcOEt /Hexane: 10/90).

$^1\text{H}$  NMR (400 MHz,  $\text{CDCl}_3$ )  $\delta = 8.38$  (d,  $J = 8$  Hz, 1H), 7.52 (d,  $J = 8$  Hz, 2H), 7.40 (t,  $J = 8$  Hz, 1H), 6.92-6.96 (m, 3H), 6.76 (d,  $J = 8$  Hz, 1H), 3.83 (s, 3H)

$^{13}\text{C}$  NMR (100 MHz,  $\text{CDCl}_3$ )  $\delta = 162.9, 160.7, 149.5, 137.3, 136.6, 121.1, 120.4, 119.5, 115.3, 55.5$

HRMS (ESI)  $m/z$ :  $[\text{M}+\text{H}]^+$  calculated for  $\text{C}_{12}\text{H}_8\text{NSF}_3$  255.0330; found 256.0330

### 2-((3-(trifluoromethyl)phenyl)thio)pyridine

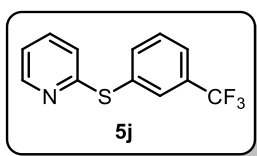

Synthesized following **general procedure B** starting from 2-mercaptopyridine (38.9 mg, 0.35 mmol) and **2j-An** (185 mg, 0.35 mmol). The reaction was stirred for 3 h. The reaction mixture was purified by column chromatography (AcOEt/Hexane: 2/98  $\rightarrow$  10/90) to afford **5j** (64 mg, 0.252 mmol, 72%) as yellow liquid.  $R_f$  0.45 (AcOEt /Hexane: 10/90).

$^1\text{H}$  NMR (400 MHz,  $\text{CDCl}_3$ )  $\delta = 8.43$  (d,  $J = 8$  Hz) 1H), 7.82 (s, 1H), 7.73 (d,  $J = 8$  Hz, 1H), 7.62 (d,  $J = 8$  Hz, 1H), 7.51 (t,  $J = 8$  Hz, 2H), 7.03-7.07 (m, 1H), 7.01 (d,  $J = 8$  Hz, 1H)

$^{13}\text{C}$  NMR (100 MHz,  $\text{CDCl}_3$ )  $\delta = 159.4, 150.0, 137.5, 137.1, 133.6, 133.1, 132.4, 132.1, 131.7, 131.4, 130.9, 129.9, 125.5, 125.1, 122.3, 120.7$

HRMS (ESI)  $m/z$ :  $[\text{M}+\text{H}]^+$  calculated for  $\text{C}_{12}\text{H}_8\text{NSF}_3$  255.0330; found 256.0334

## 2-((2'-iodo-[1,1'-biphenyl]-2-yl)thio)pyridine

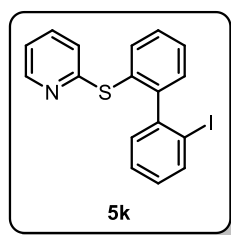

Synthesized following **general procedure B** starting from 2-mercaptopyridine (27.7 mg, 0.25 mmol) and **2c-OTf** (108 mg, 0.25 mmol). The reaction was stirred for 3 h. The reaction mixture was purified by column chromatography (AcOEt/Hexane: 2/98 → 10/90) to afford **5k** (64 mg, 0.165 mmol, 66%) as yellow liquid.  $R_f$  0.3 (AcOEt /Hexane: 10/90).

**$^1\text{H NMR}$**  (400 MHz,  $\text{CDCl}_3$ )  $\delta$  = 8.33 (d,  $J$ = 8 Hz, 1H), 7.55 (dd,  $J$ = 8 & 1 Hz, 1H), 7.66-7.68 (m, 1H), 7.28 (dd,  $J$ = 8 & 1 Hz, 1H), 7.21-7.25 (m, 1H), 7.12 (d,  $J$ = 8 Hz, 1H) 6.91-6.99 (m, 3H)

**$^{13}\text{C NMR}$**  (100 MHz,  $\text{CDCl}_3$ )  $\delta$  = 160.7, 149.5, 148.2, 145.3, 138.8, 136.5, 135.7, 131.1, 130.1, 128.9, 127.6, 122.5, 120.1, 100.1

HRMS (ESI)  $m/z$ :  $[\text{M}+\text{H}]^+$  calculated for  $\text{C}_{17}\text{H}_{12}\text{NSI}$  388.9735; found 389.9735

## 9. REFERENCES

1. I. Vogel, B. S. Furnis, A. J. Hannaford, V. Rogers, P. W. G. Smith, A. R. Tatchell, Vogel's Textbook of Practical Organic Chemistry, 1978.
2. N. Sun, B. Li, J. Shao, W. Mo, B. Hu, Z. Shen and X. Hu, *Beilstein J. Org. Chem.*, 2012, **8**, 61–70.
3. K. Ando and D. Takama, *Org. Lett.*, 2020, **22**, 6907–6910.
4. M. Bielawski, M. Zhu and B. Olofsson, *Adv. Synth. Catal.*, 2007, **349** (17–18), 2610–2618.
5. M. Zhu, N. Jalalian and B. Olofsson, *Synlett*, 2008, **4**, 592–596.
6. M. Bielawski, D. Aili and B. Olofsson, *J. Org. Chem.*, 2008, **73** (12), 4602–4607.
7. G. Kervefors, L. Kersting and B. Olofsson, *Chem. - A Eur. J.*, 2021, **27**, 5790–5795.
8. R. J. Phipps, N. P. Grimster and M. J. Gaunt, *J. Am. Chem. Soc.*, 2008, **130** (26), 8172–8174.
9. V. Carreras, A. H. Sandtorv and D. R. Stuart, *J. Org. Chem.*, 2017, **82**, 1279–1284.
10. T. L. Seidl, S. K. Sundalam, B. McCullough and D. R. Stuart, *J. Org. Chem.*, 2016, **81**, 1998–2009.
11. N. Soldatova, P. Postnikov, O. Kukurina, V. V. Zhdankin, A. Yoshimura, T. Wirth and M. S. Yusubov, *Beilstein J. Org. Chem.*, 2018, **14**, 849–855.

12. Gaussian 09, Revision A.02, M. J. Frisch, G. W. Trucks, H. B. Schlegel, G. E. Scuseria, M. A. Robb, J. R. Cheeseman, G. Scalmani, V. Barone, G. A. Petersson, H. Nakatsuji, X. Li, M. Caricato, A. Marenich, J. Bloino, B. G. Janesko, R. Gomperts, B. Mennucci, H. P. Hratchian, J. V. Ortiz, A. F. Izmaylov, J. L. Sonnenberg, D. Williams-Young, F. Ding, F. Lipparini, F. Egidi, J. Goings, B. Peng, A. Petrone, T. Henderson, D. Ranasinghe, V. G. Zakrzewski, J. Gao, N. Rega, G. Zheng, W. Liang, M. Hada, M. Ehara, K. Toyota, R. Fukuda, J. Hasegawa, M. Ishida, T. Nakajima, Y. Honda, O. Kitao, H. Nakai, T. Vreven, K. Throssell, J. A. Montgomery, Jr., J. E. Peralta, F. Ogliaro, M. Bearpark, J. J. Heyd, E. Brothers, K. N. Kudin, V. N. Staroverov, T. Keith, R. Kobayashi, J. Normand, K. Raghavachari, A. Rendell, J. C. Burant, S. S. Iyengar, J. Tomasi, M. Cossi, J. M. Millam, M. Klene, C. Adamo, R. Cammi, J. W. Ochterski, R. L. Martin, K. Morokuma, O. Farkas, J. B. Foresman and D. J. Fox, Gaussian, Inc., Wallingford CT, 2016.
13. S. Roshandel, M. J. Lunn, G. Rasul, D. S. Muthiah Ravinson, S. C. Suri and G. K. S. Prakash, *Org. Lett.*, 2019, **21**, 6255–6258.
14. S. Prasad, D. D. Rodene, M. B. Burkholder, K. J. Donald and B. F. Gupton, *ACS Omega*, 2021, **6**, 27216–27224.
15. H. B. Schlegel, *Adv. Chem. Phys.*, 2007, **67**, 249–286.
16. C. Gonzalez and H. B. Schlegel, *J. Chem. Phys.*, 1991, **95**(8), 5853–5860.
17. X. Ma, Q. Liu, X. Jia, C. Su and Q. Xu, *RSC Adv.*, 2016, **6**, 56930–56935.
18. A. García-Rubia, M. Ú. Fernández-Ibáñez, R. Gómez Arrayás and J. C. Carretero, *Chem. Eur. J.*, 2011, **17**, 3567–3570.

## 10. COPIES OF $^1\text{H}$ , $^{13}\text{C}$ and $^{19}\text{F}$ NMR SPECTRA



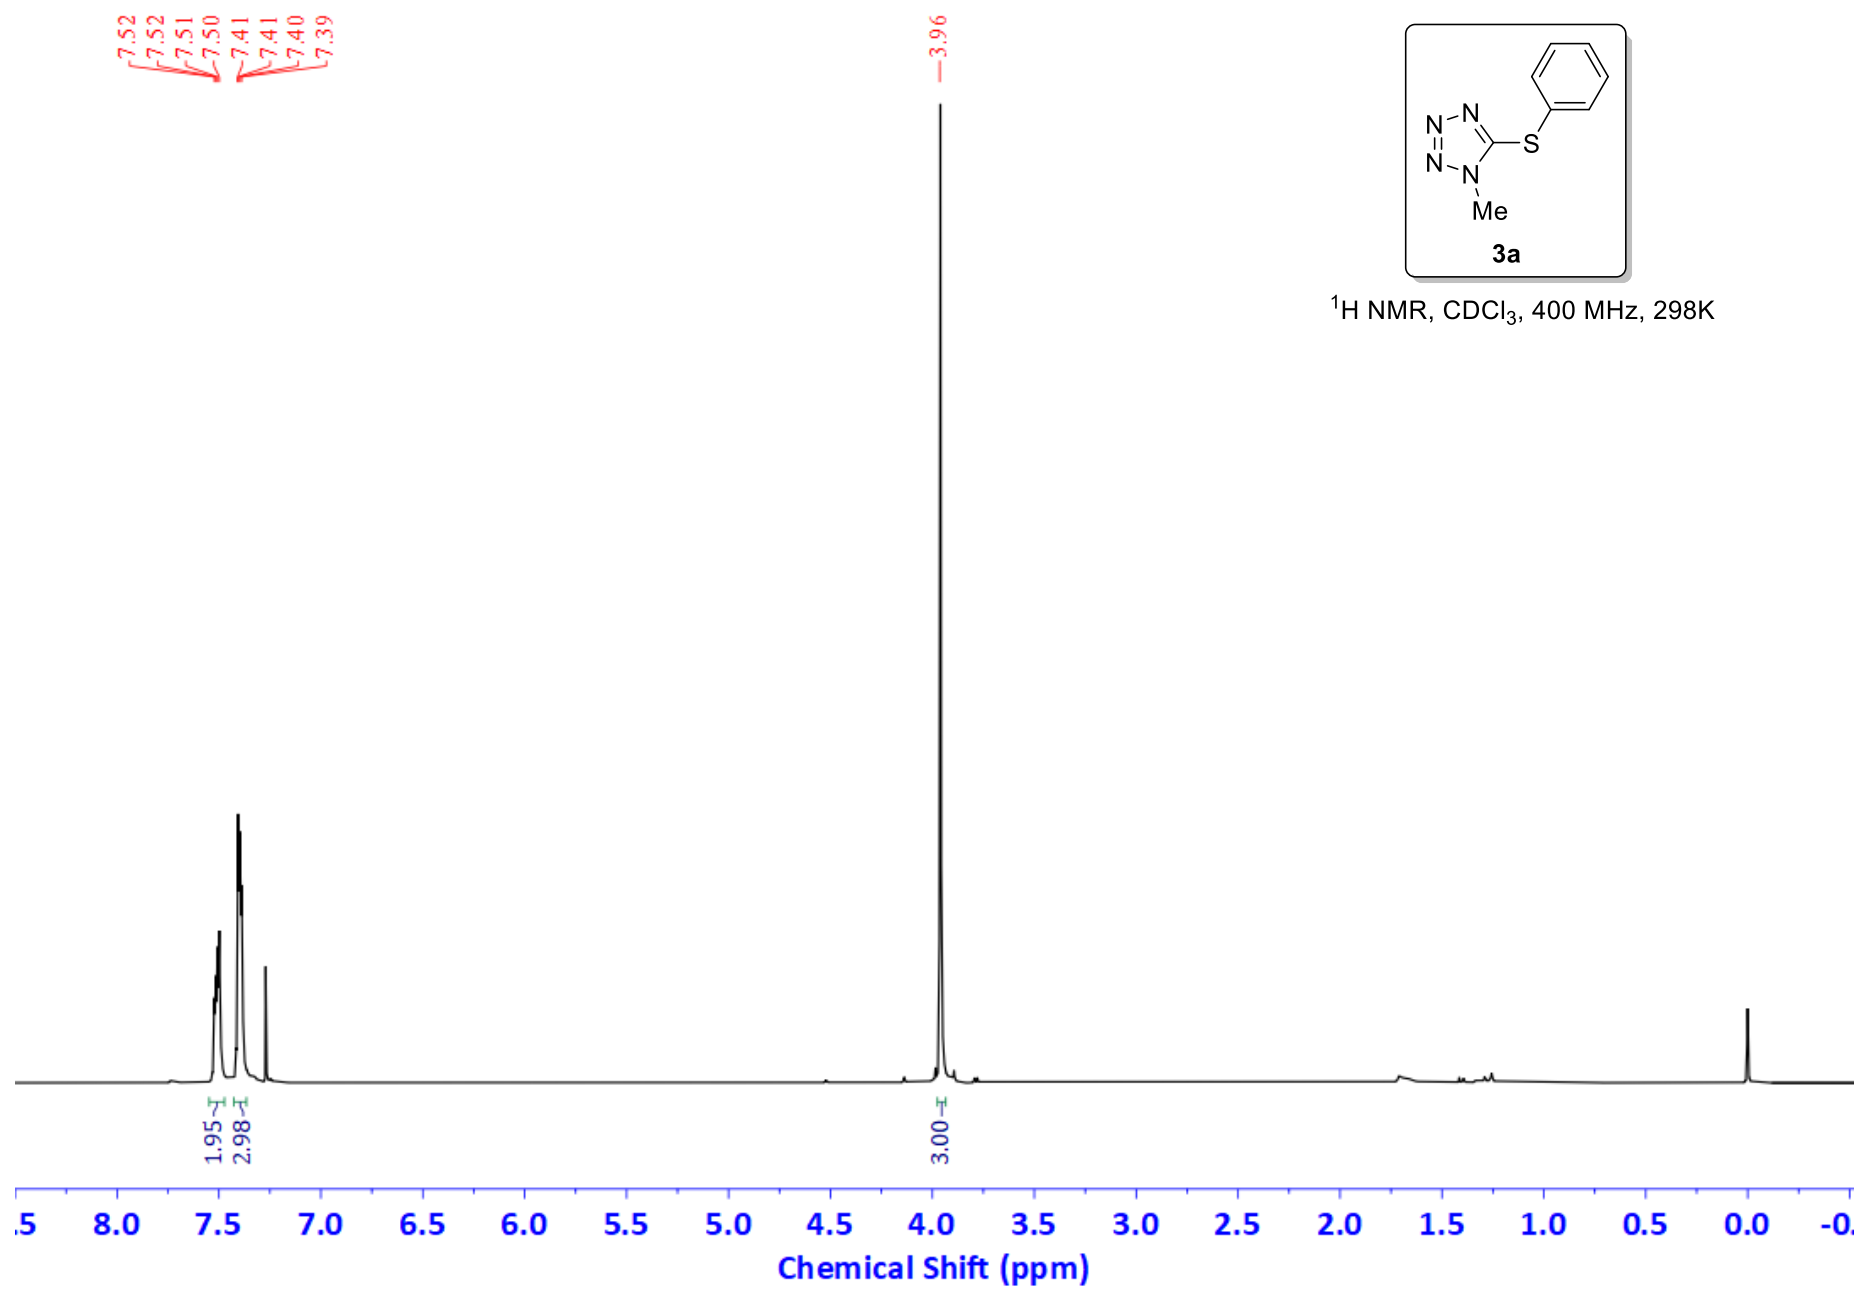

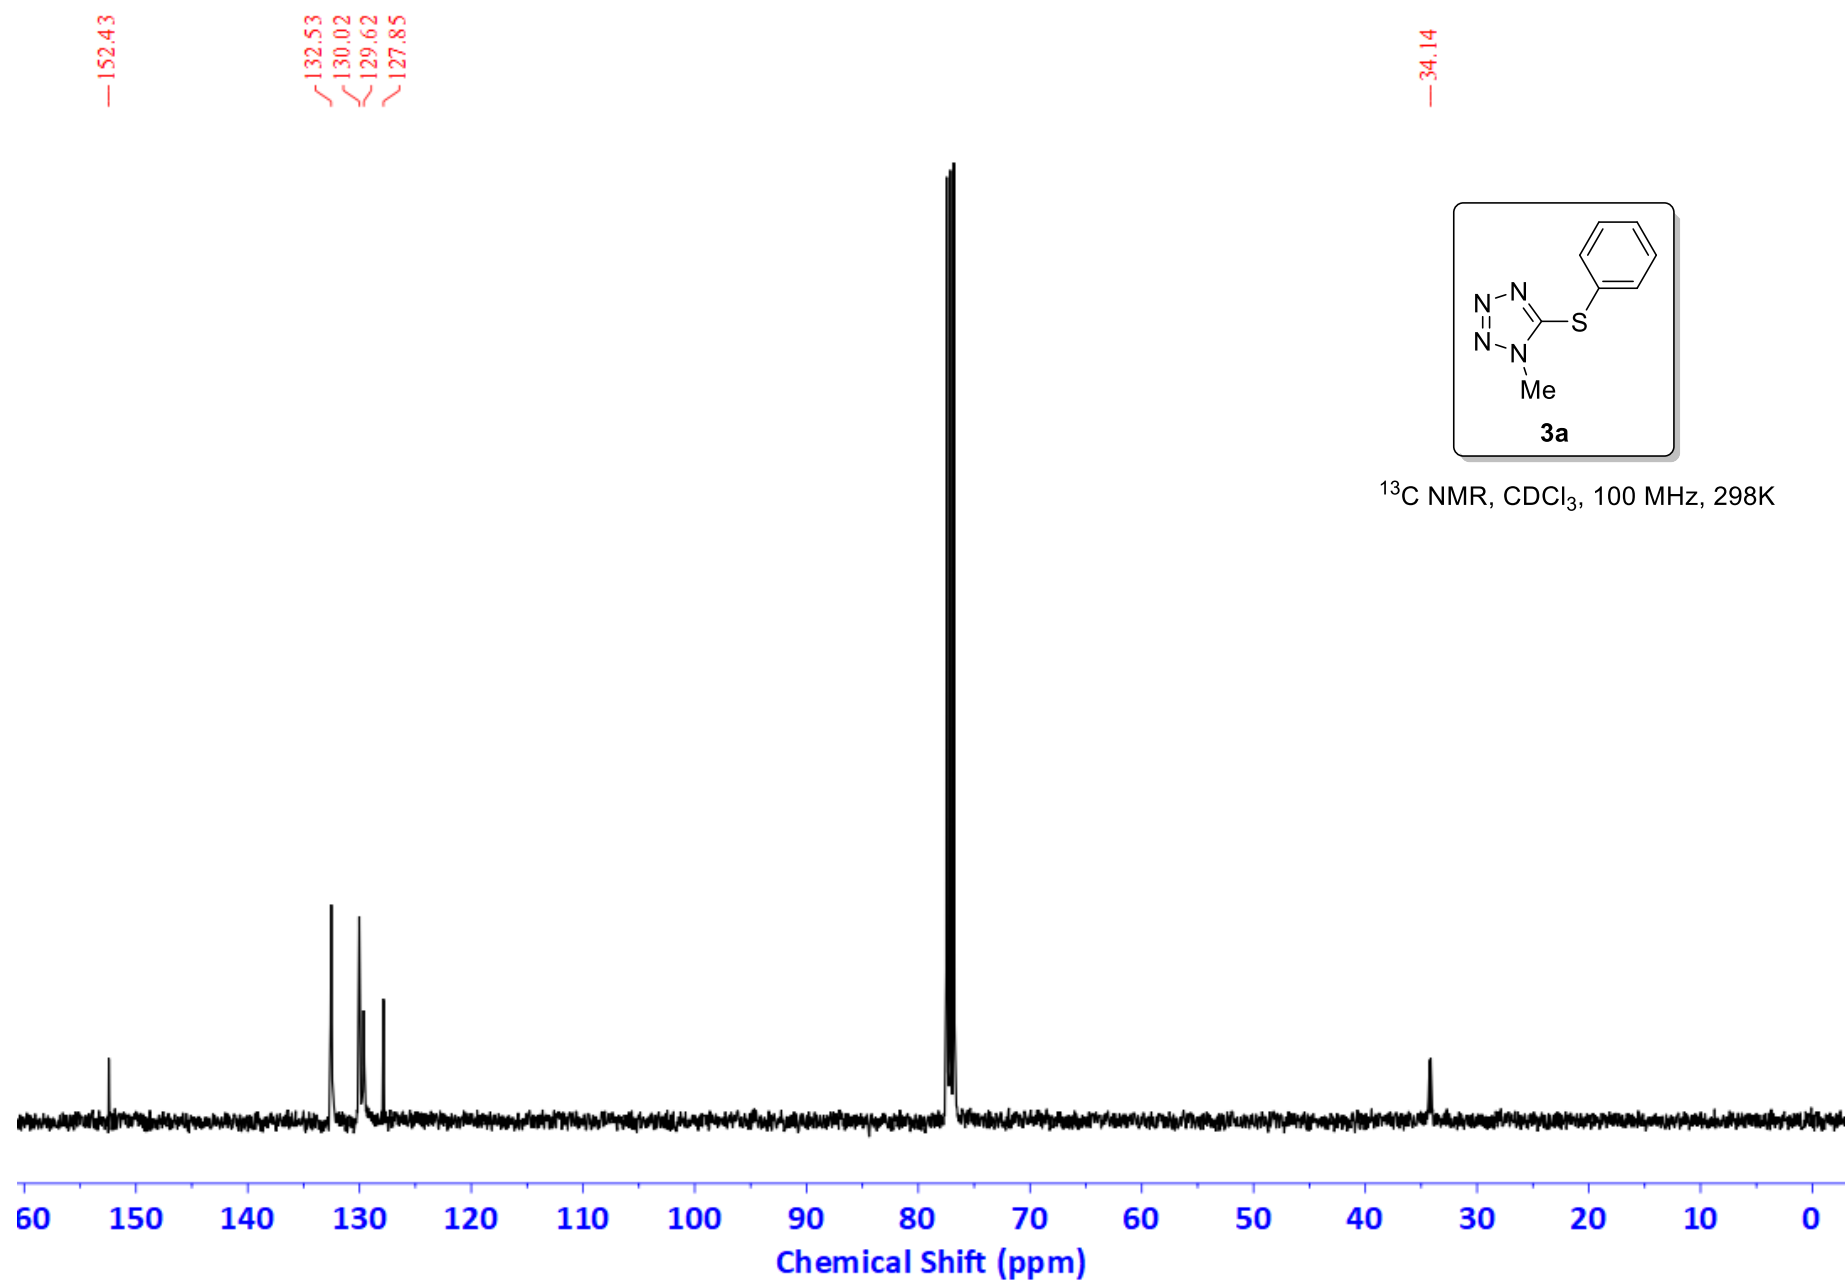

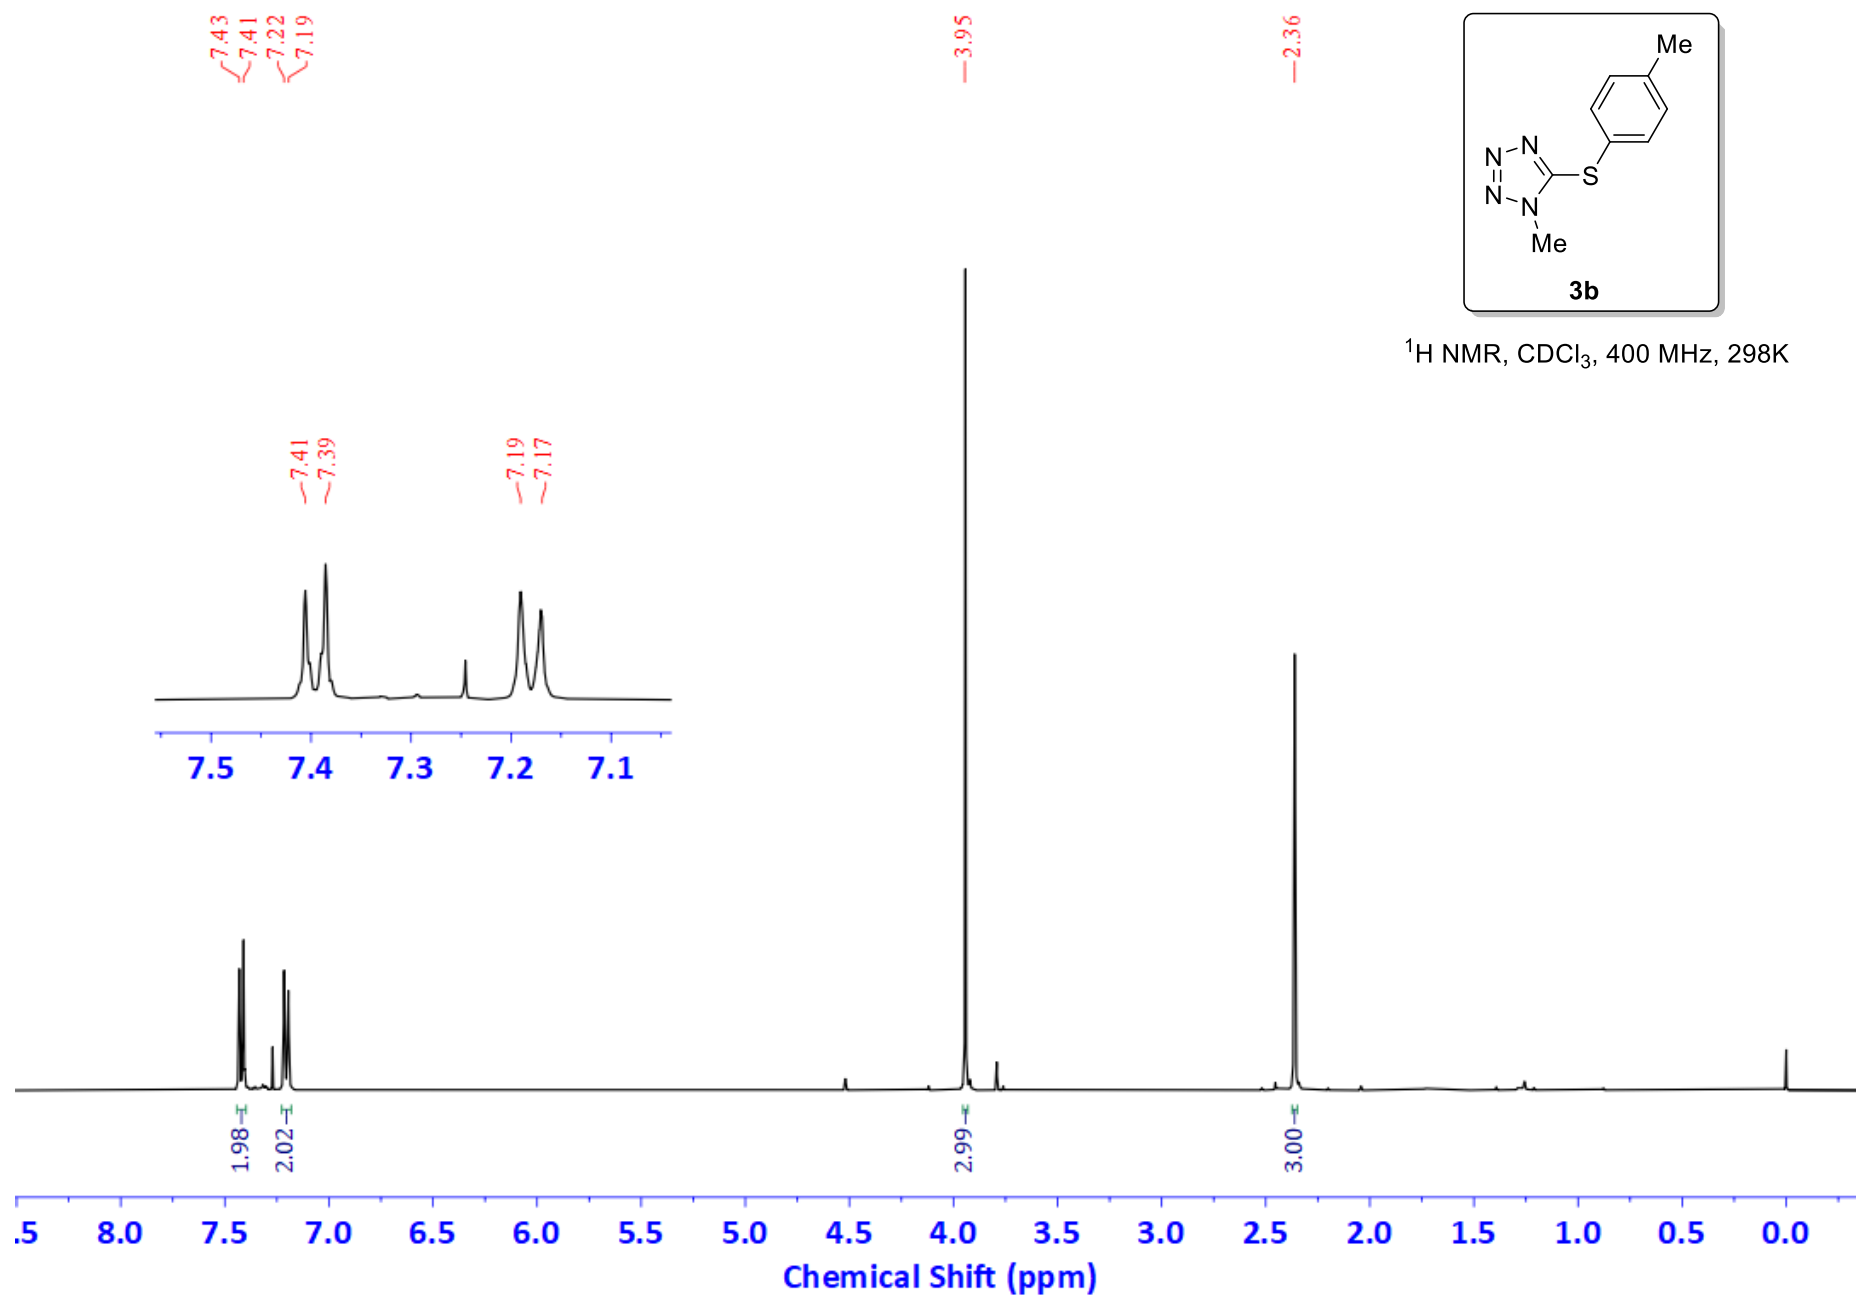

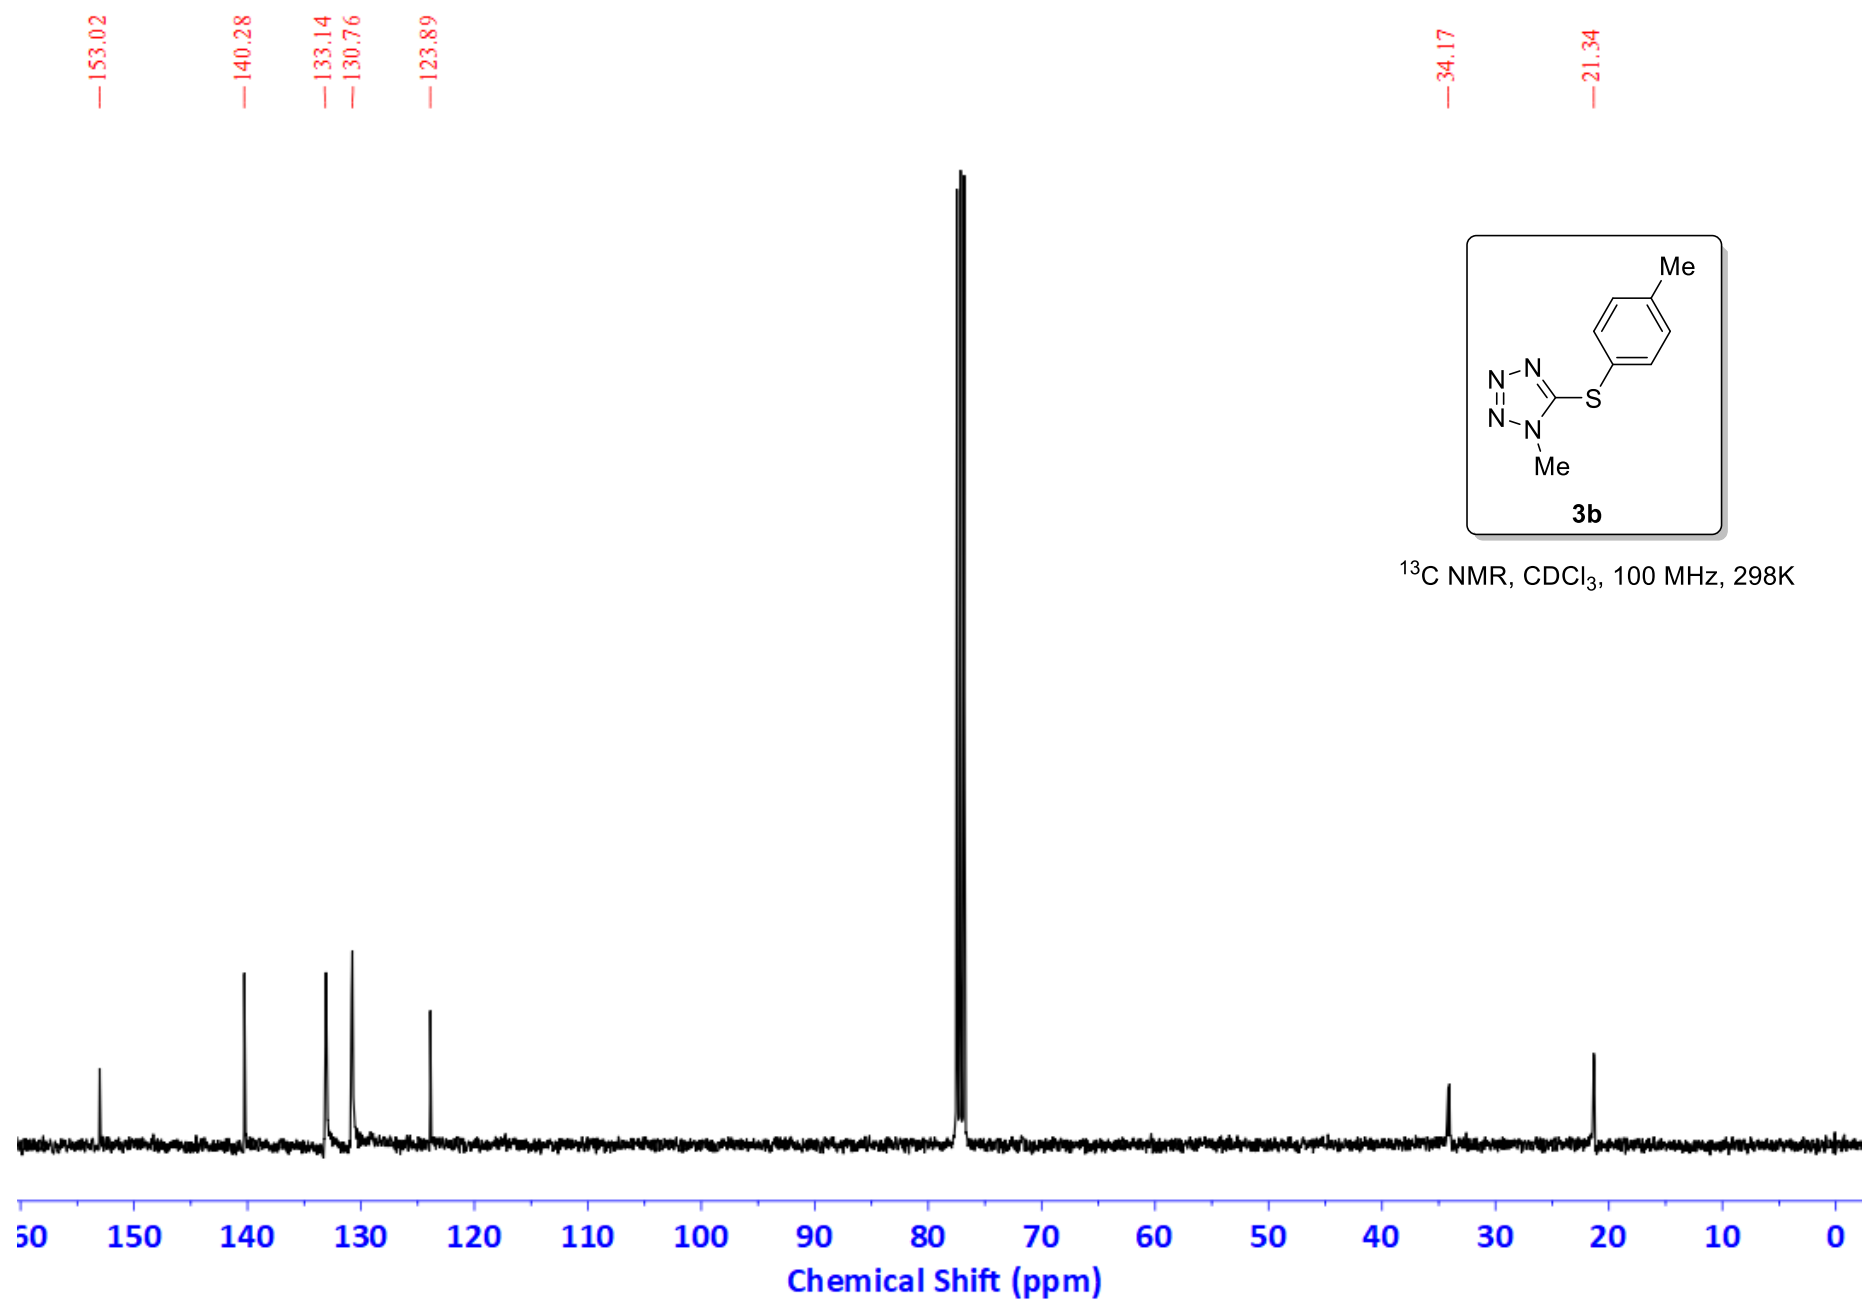

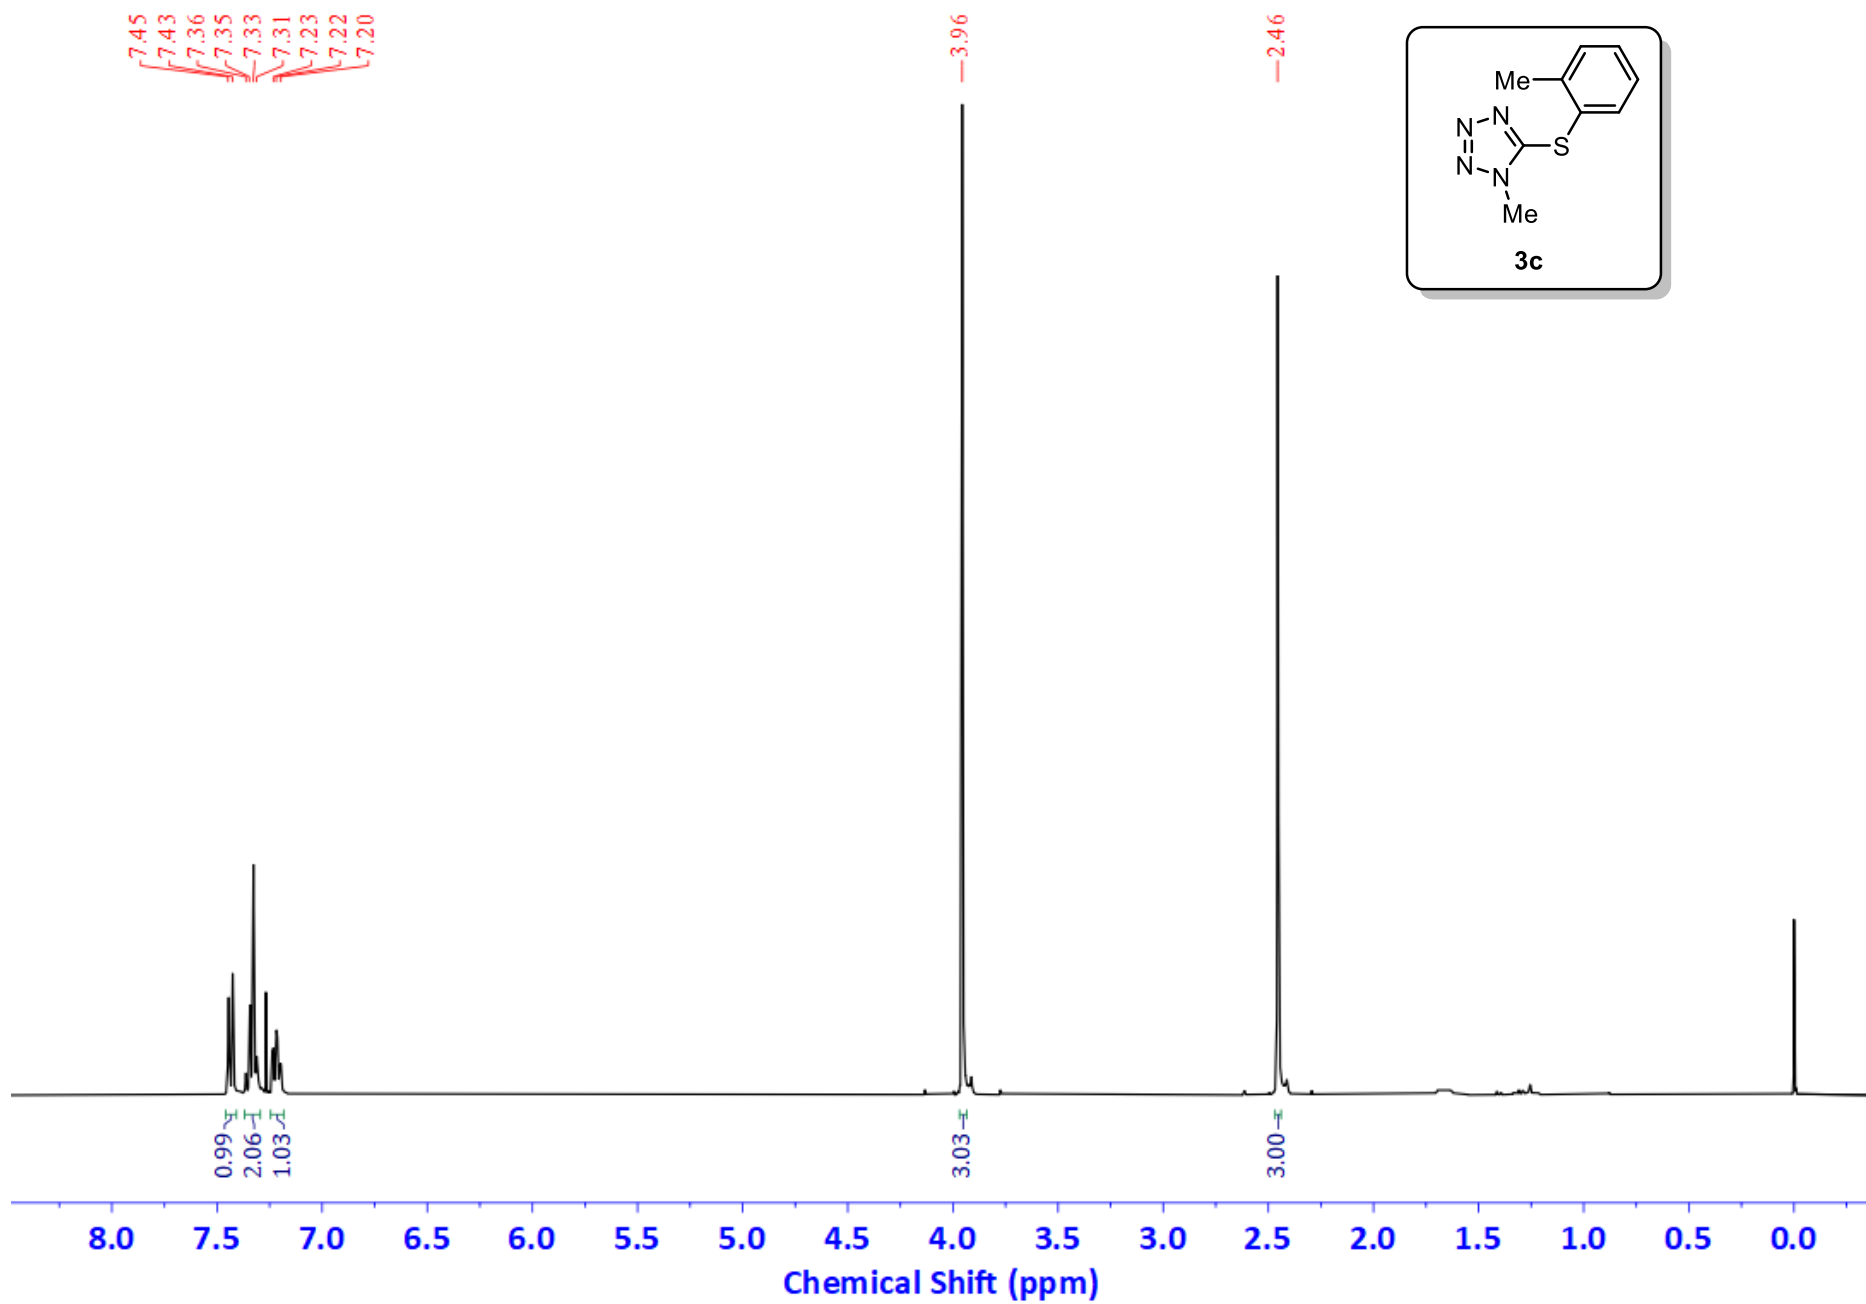

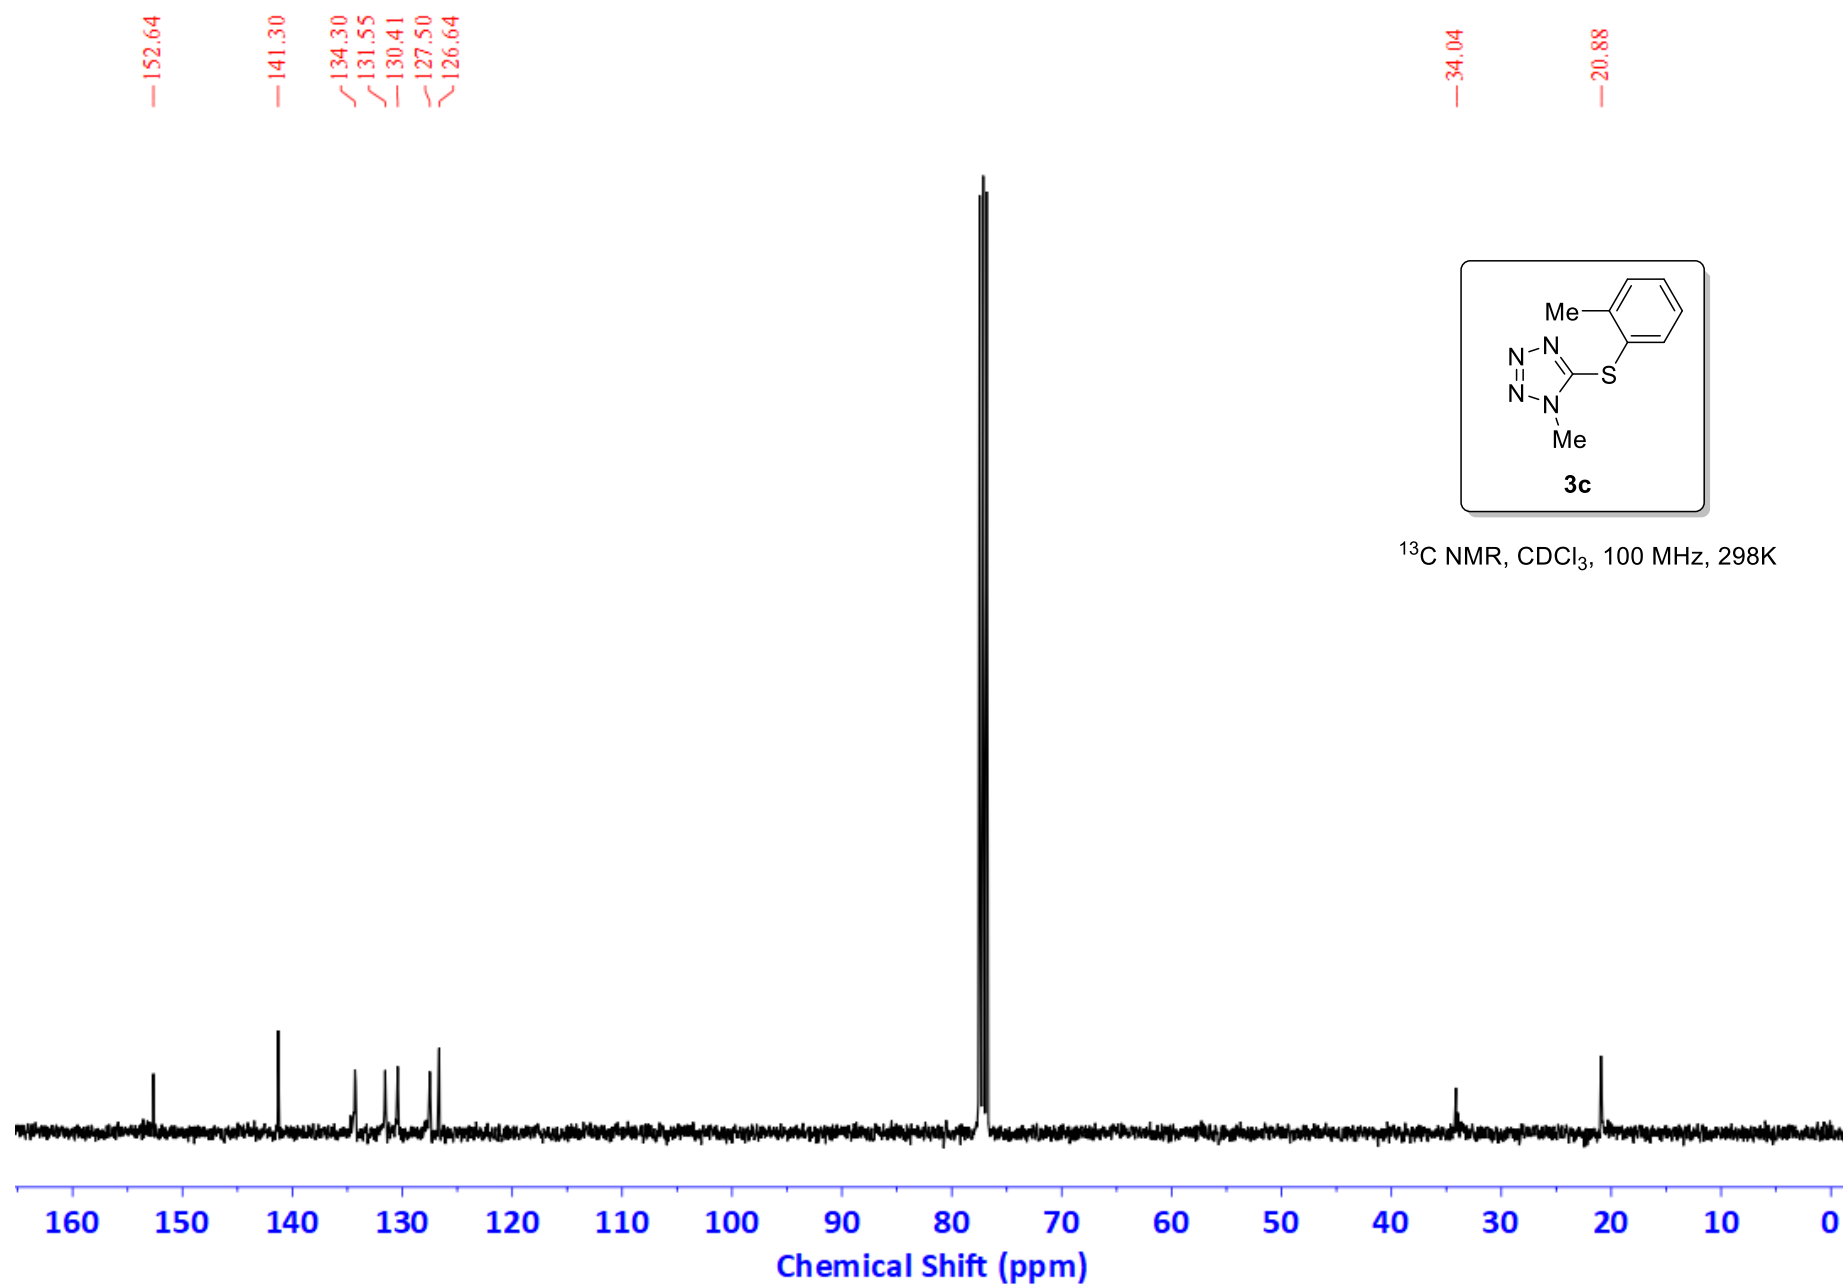

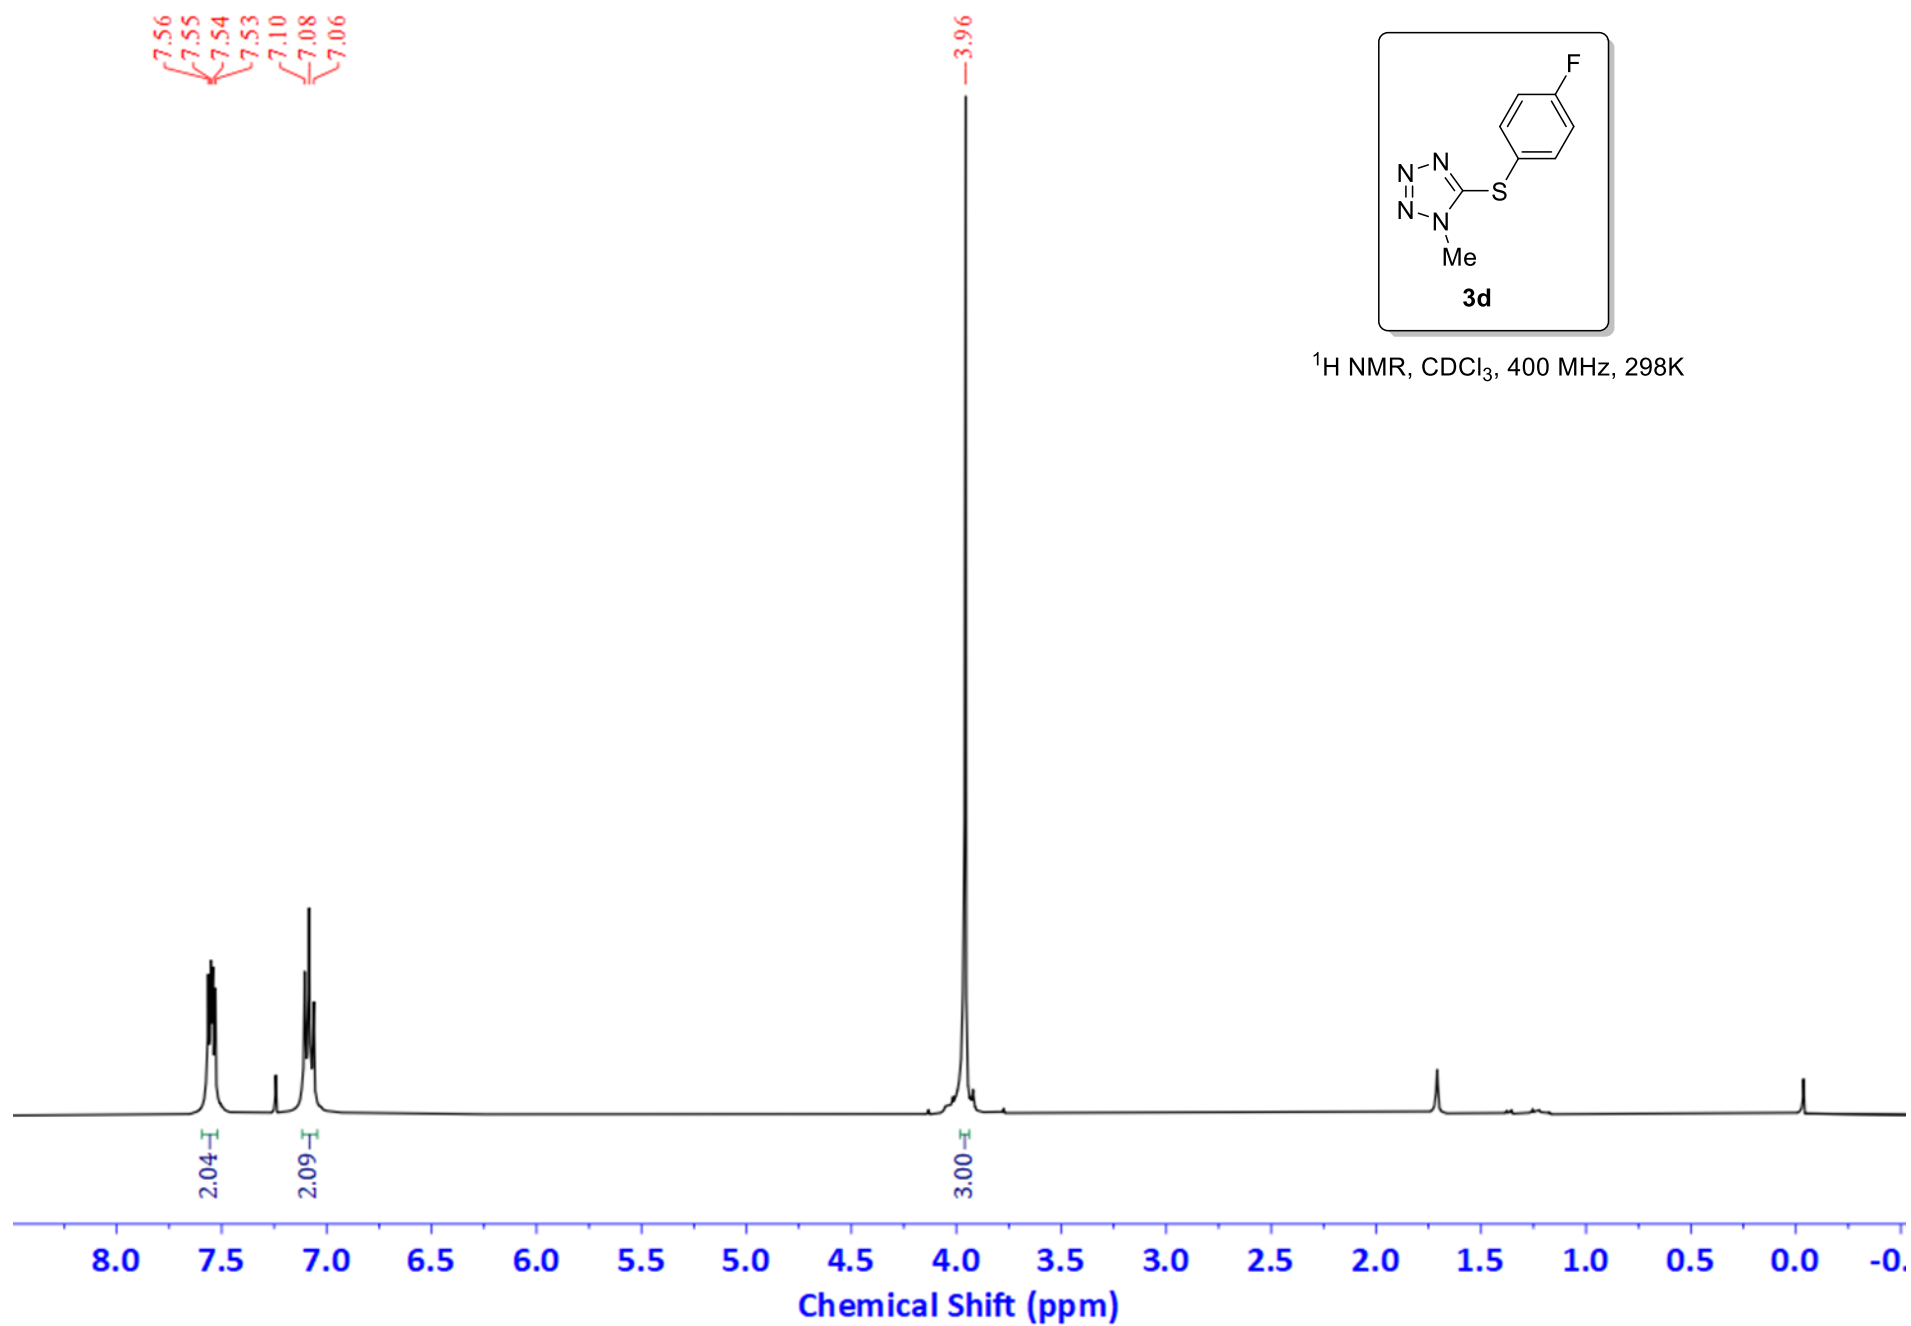

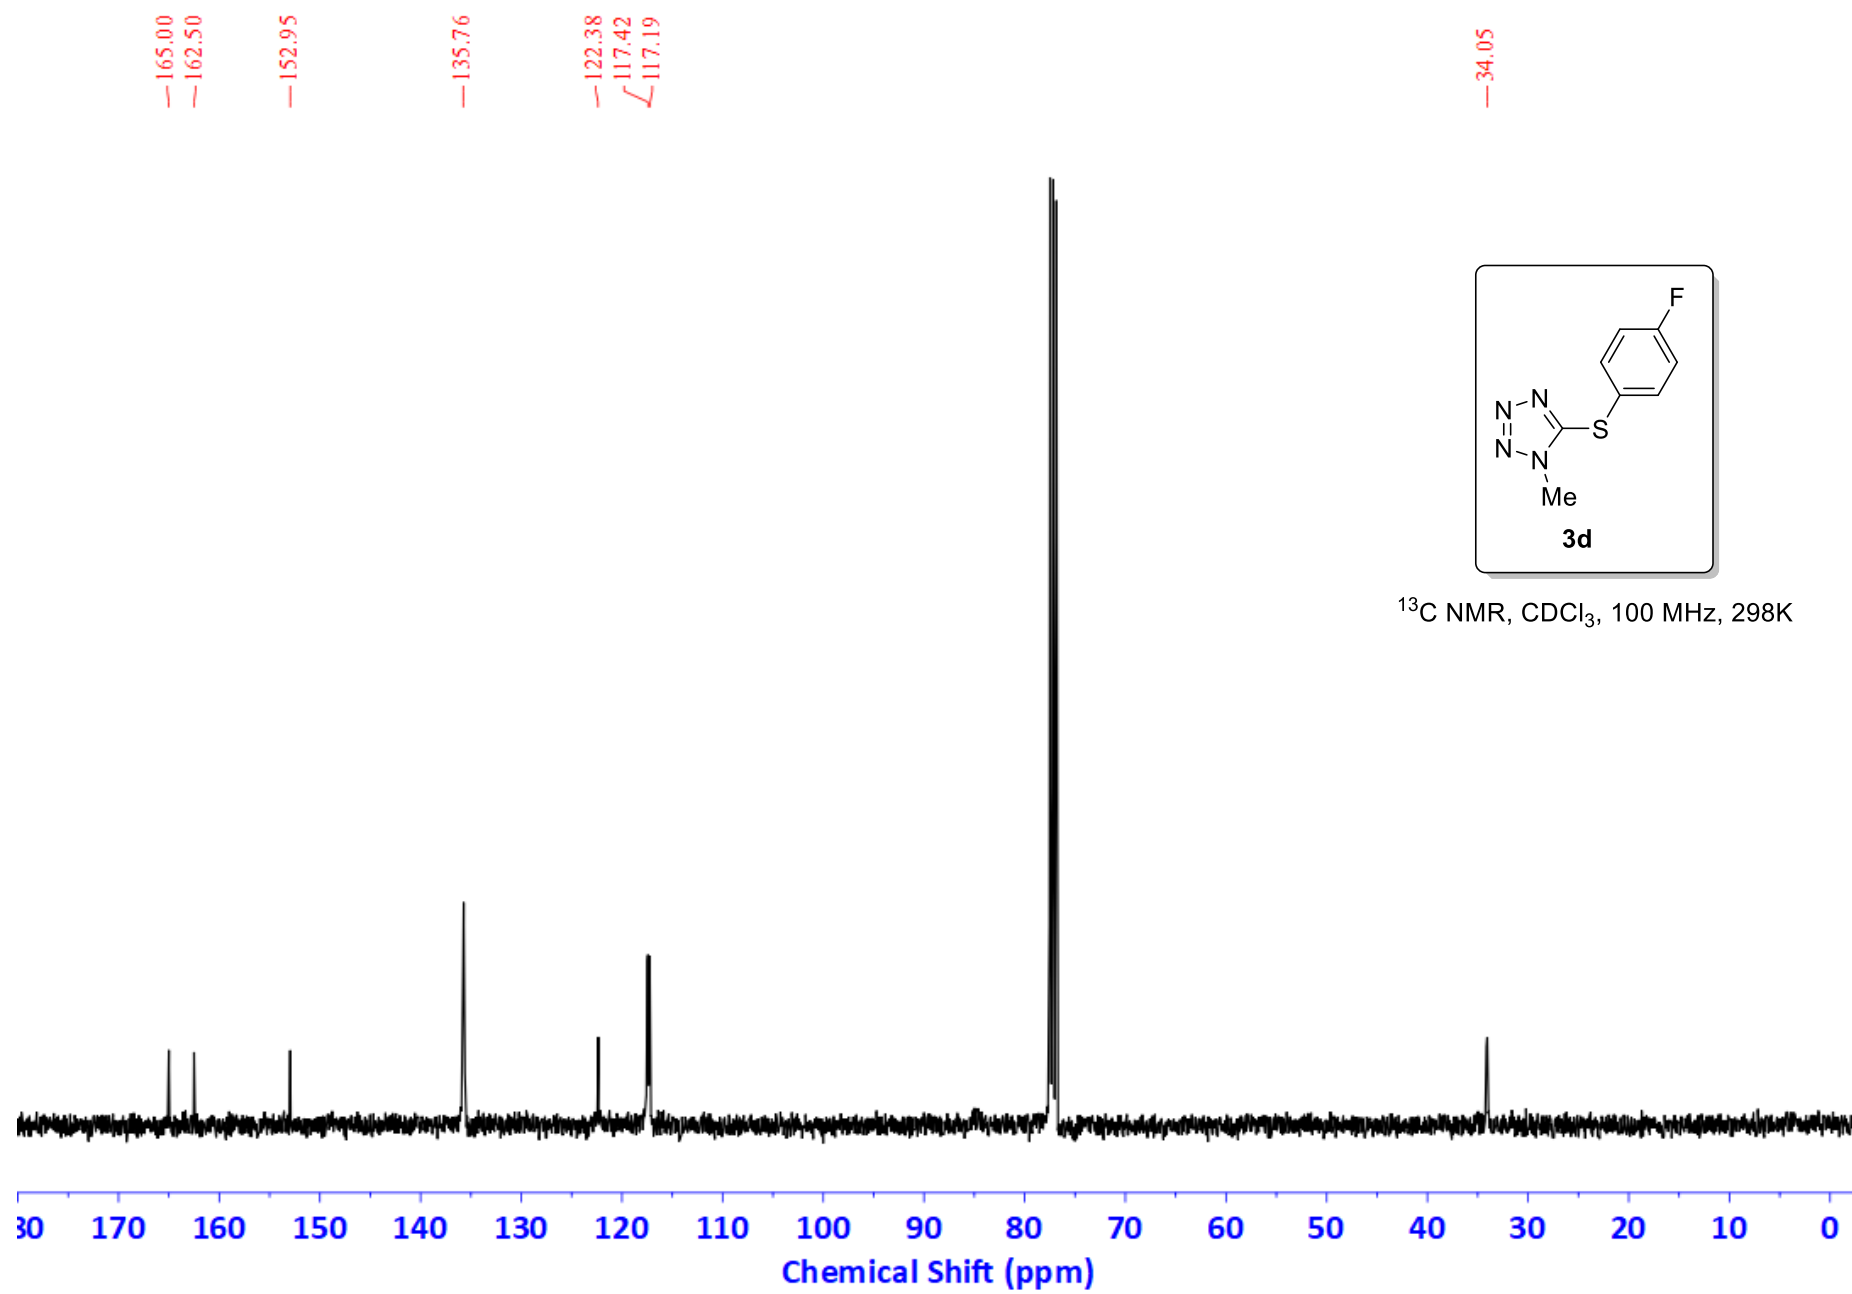



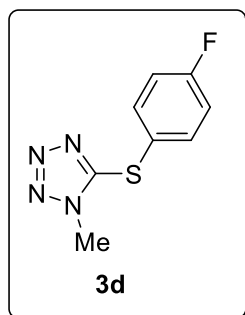

$^{19}\text{F}$  NMR,  $\text{CDCl}_3$ , 376 MHz, 298K

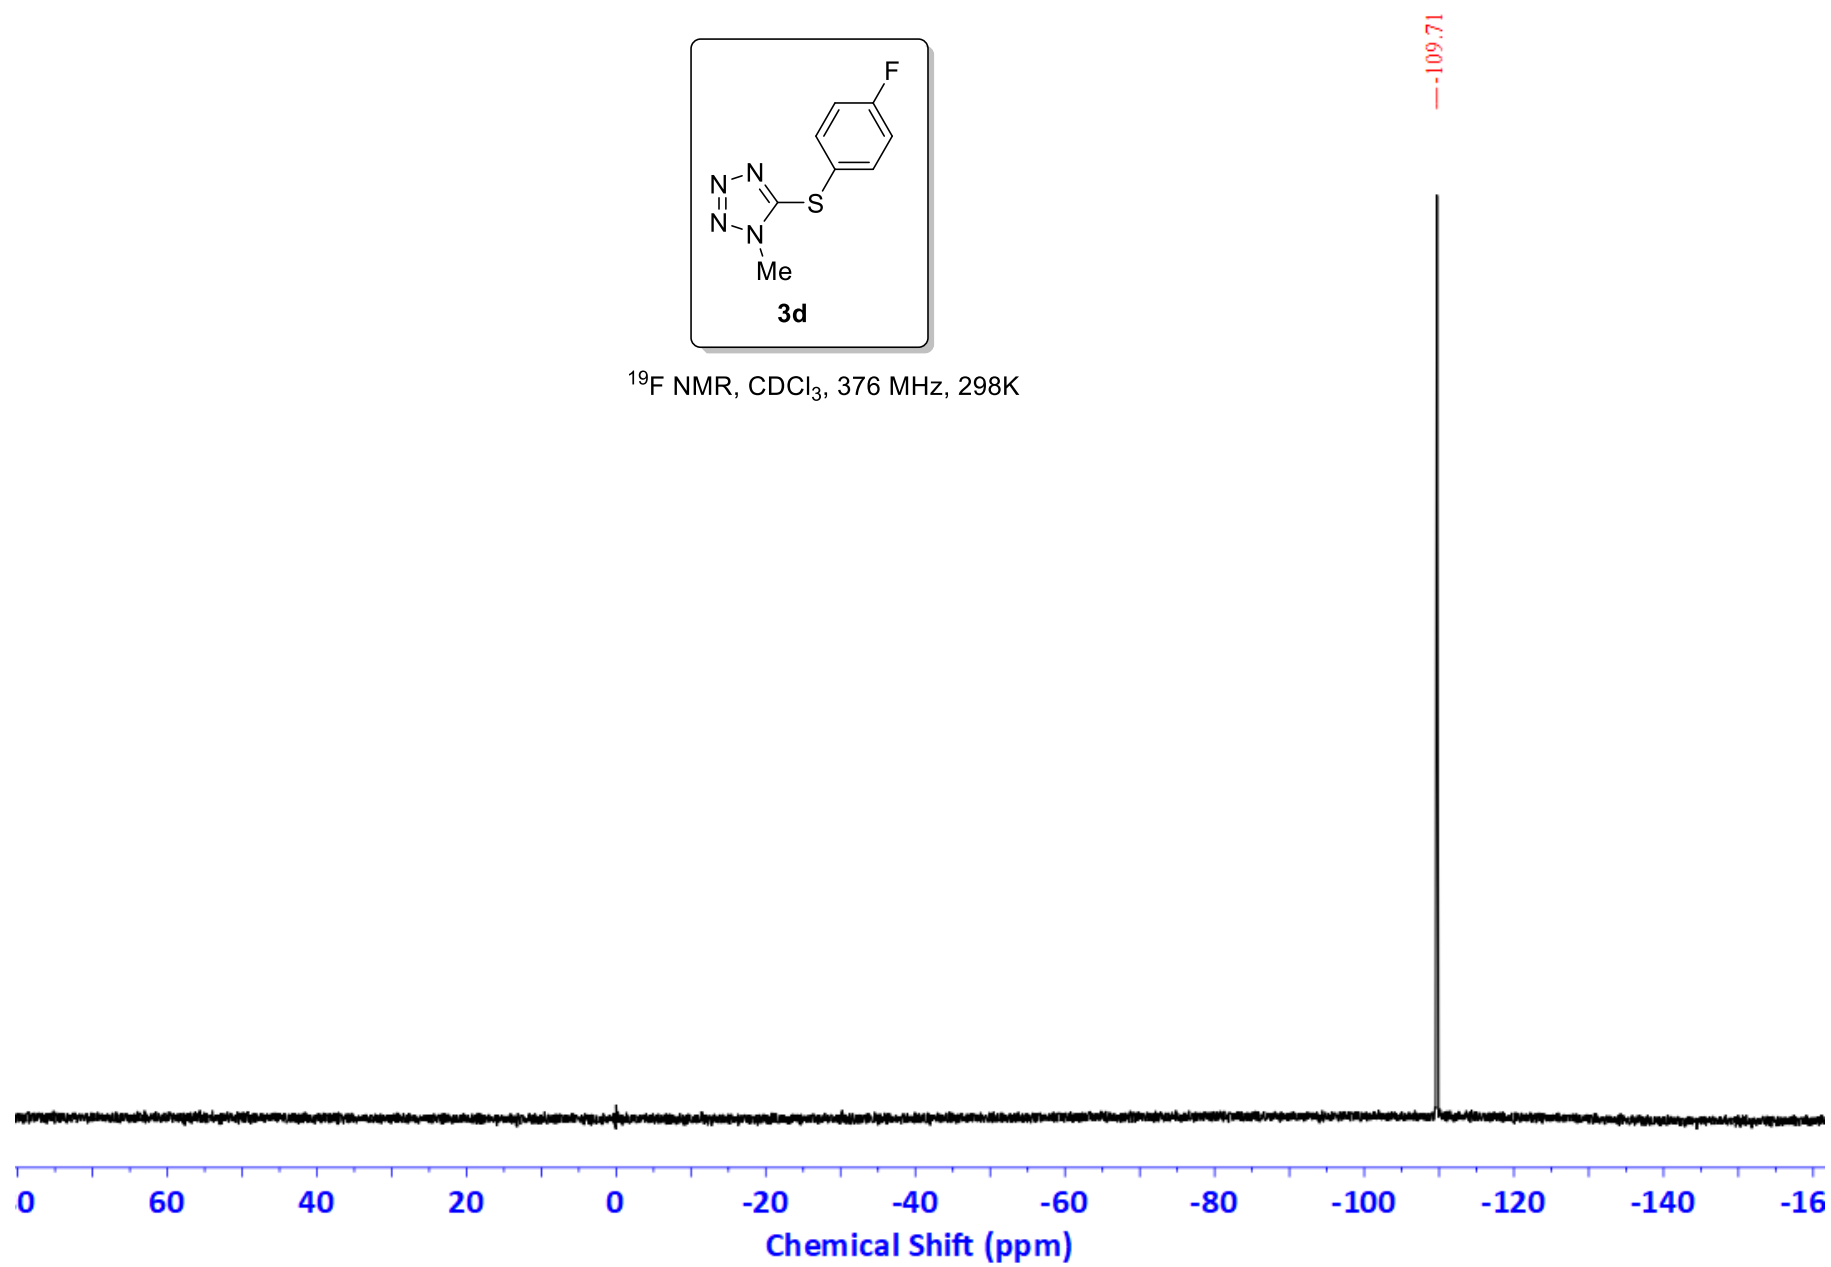

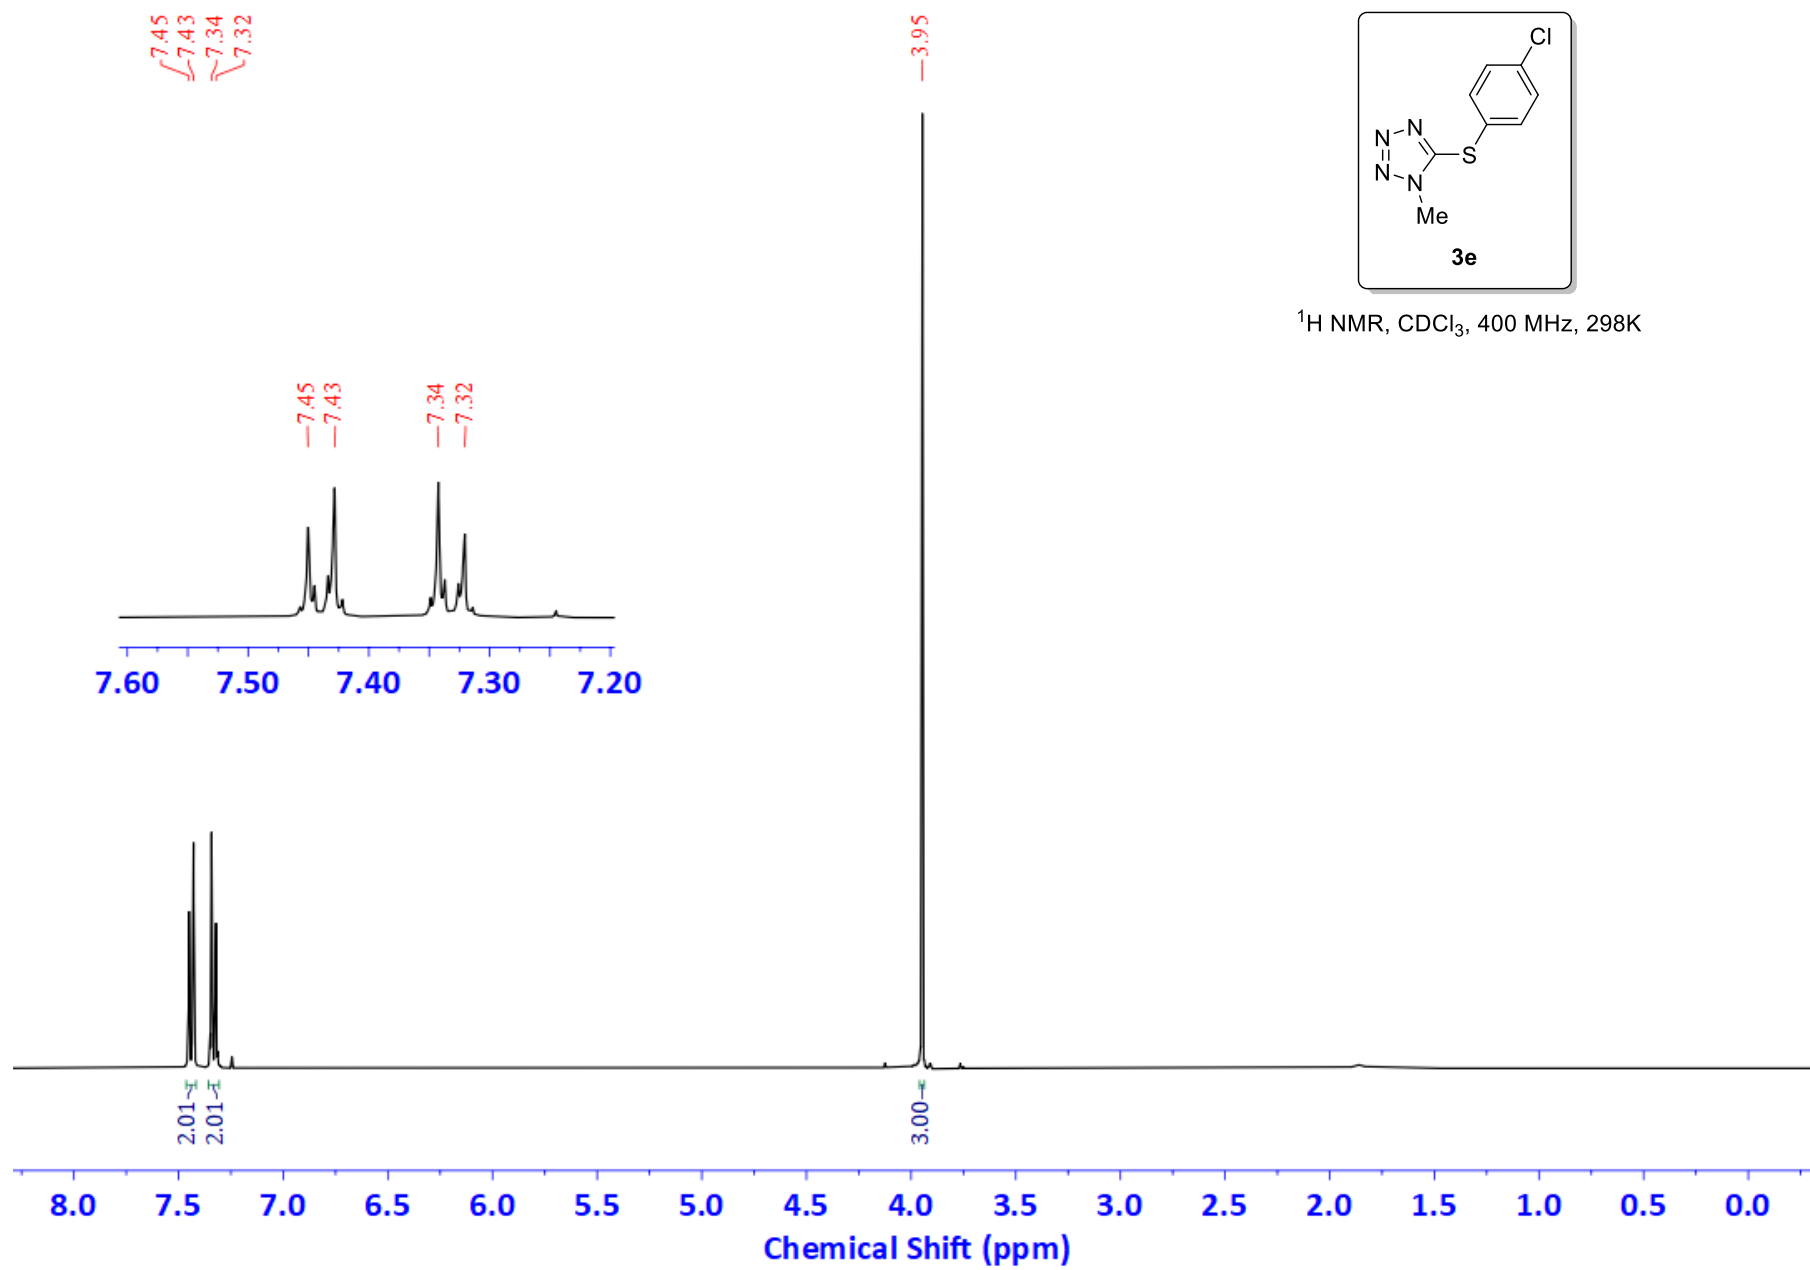

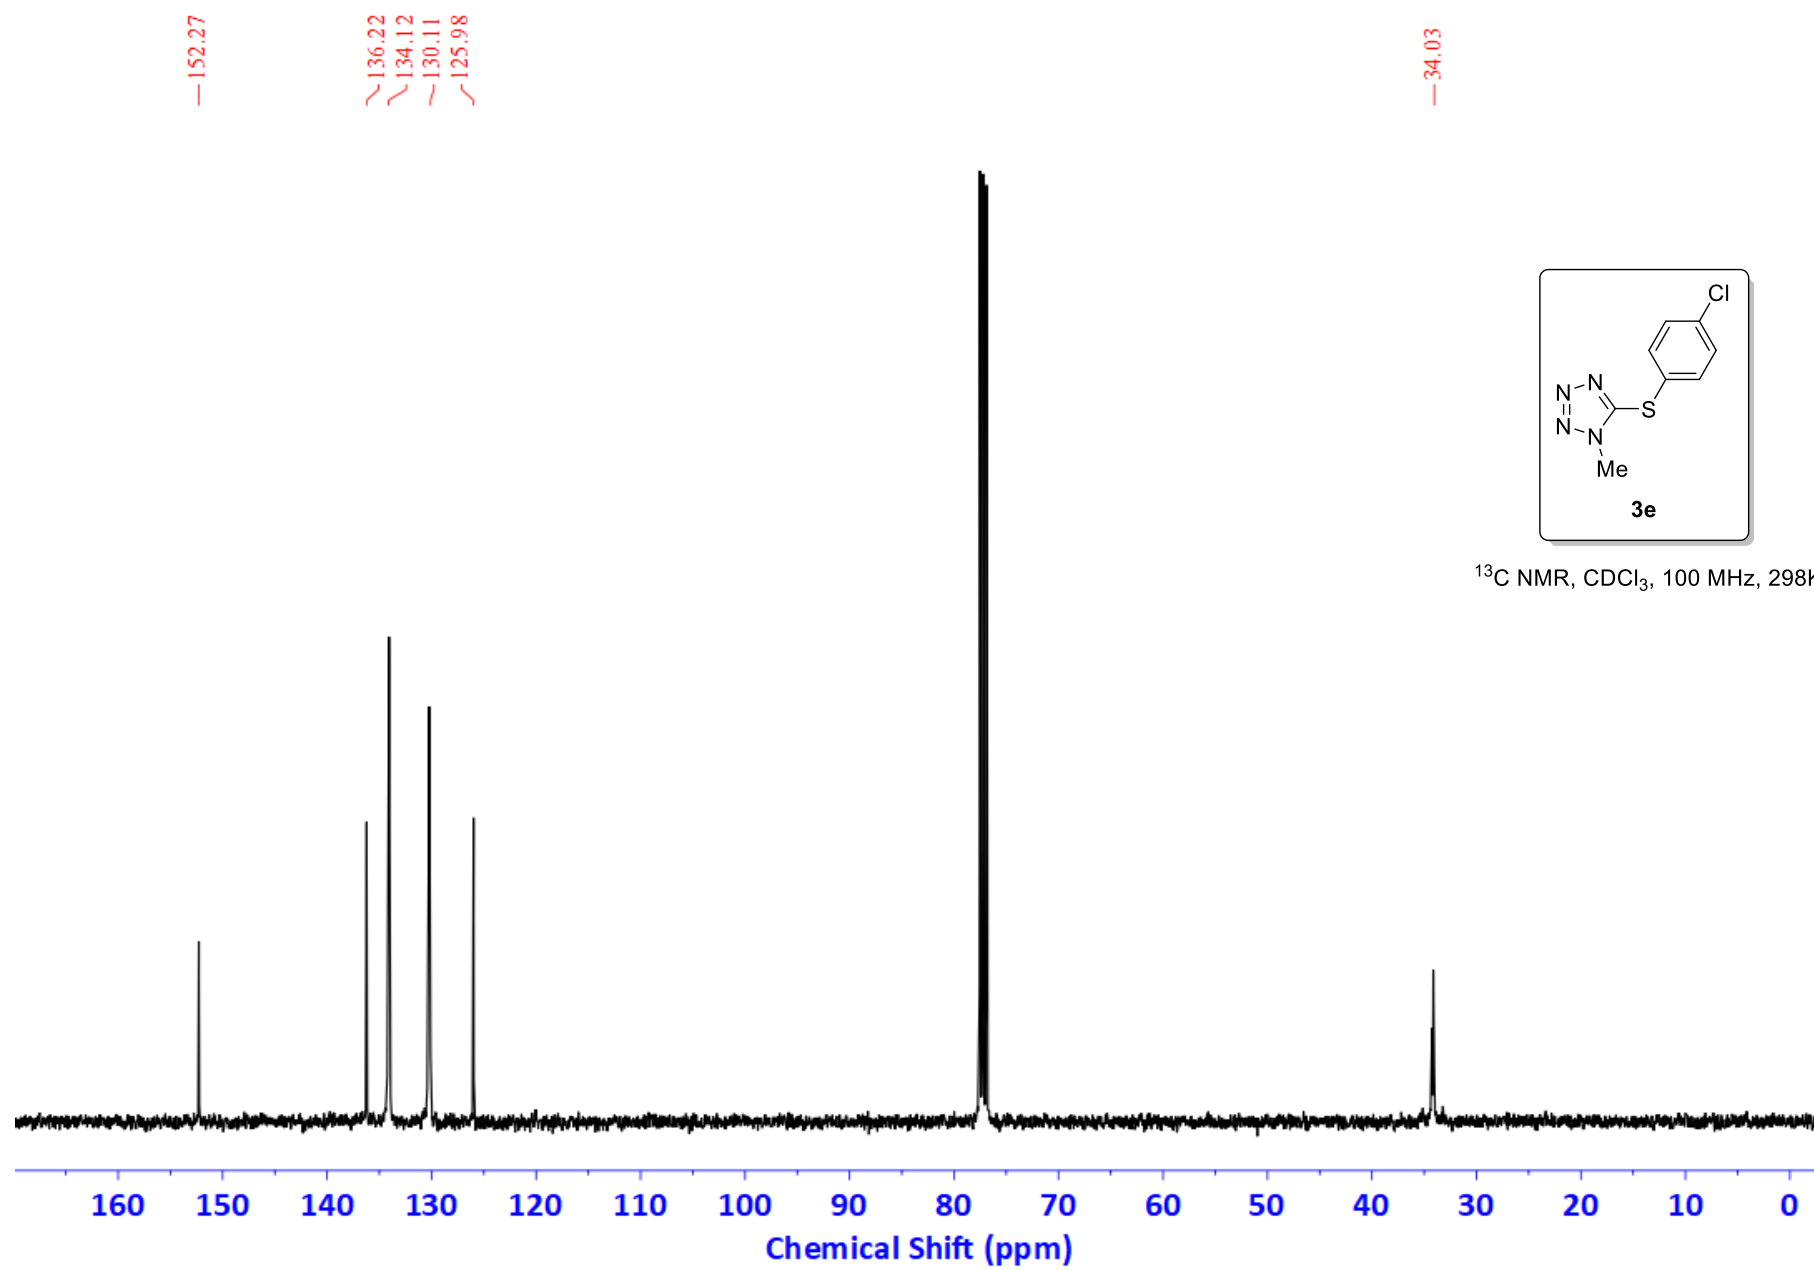

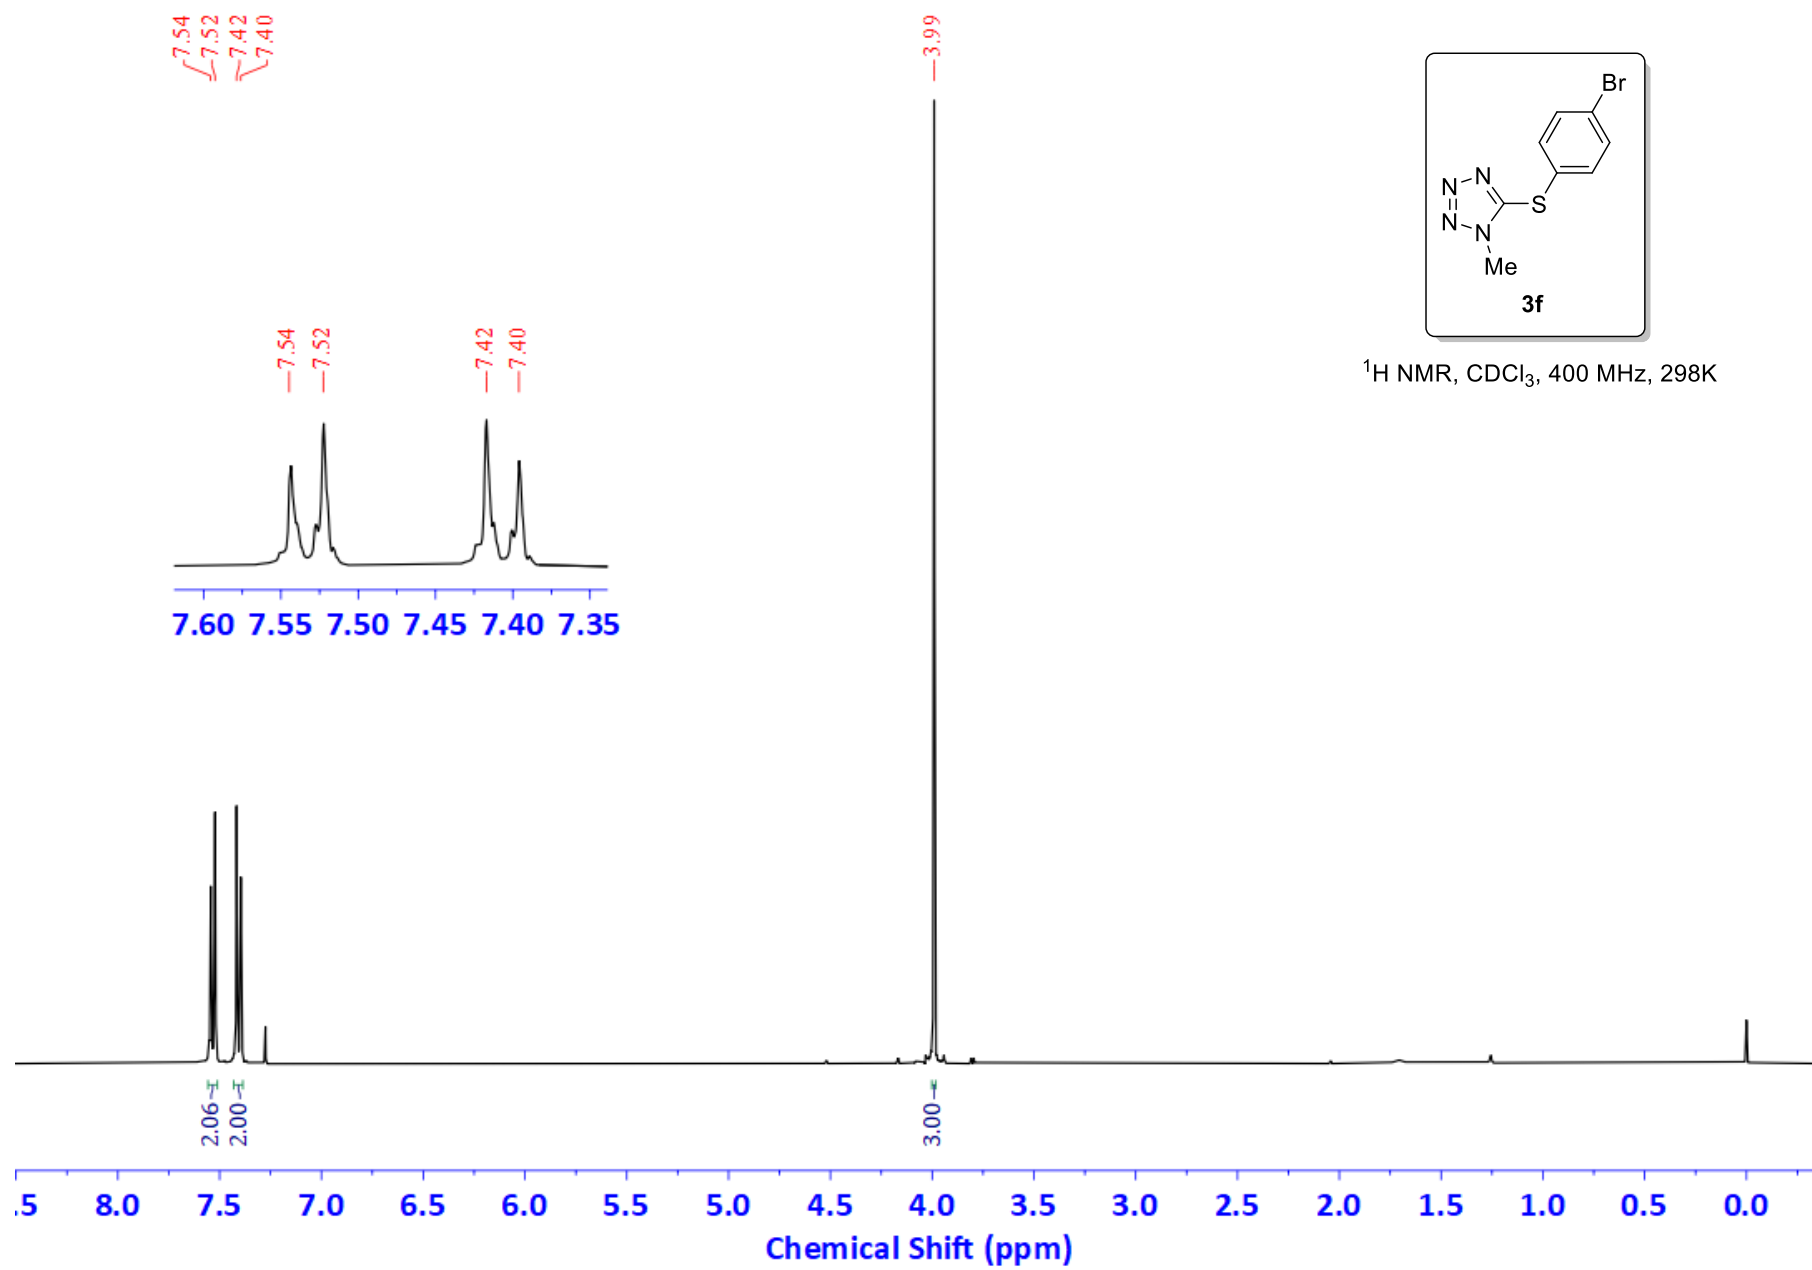

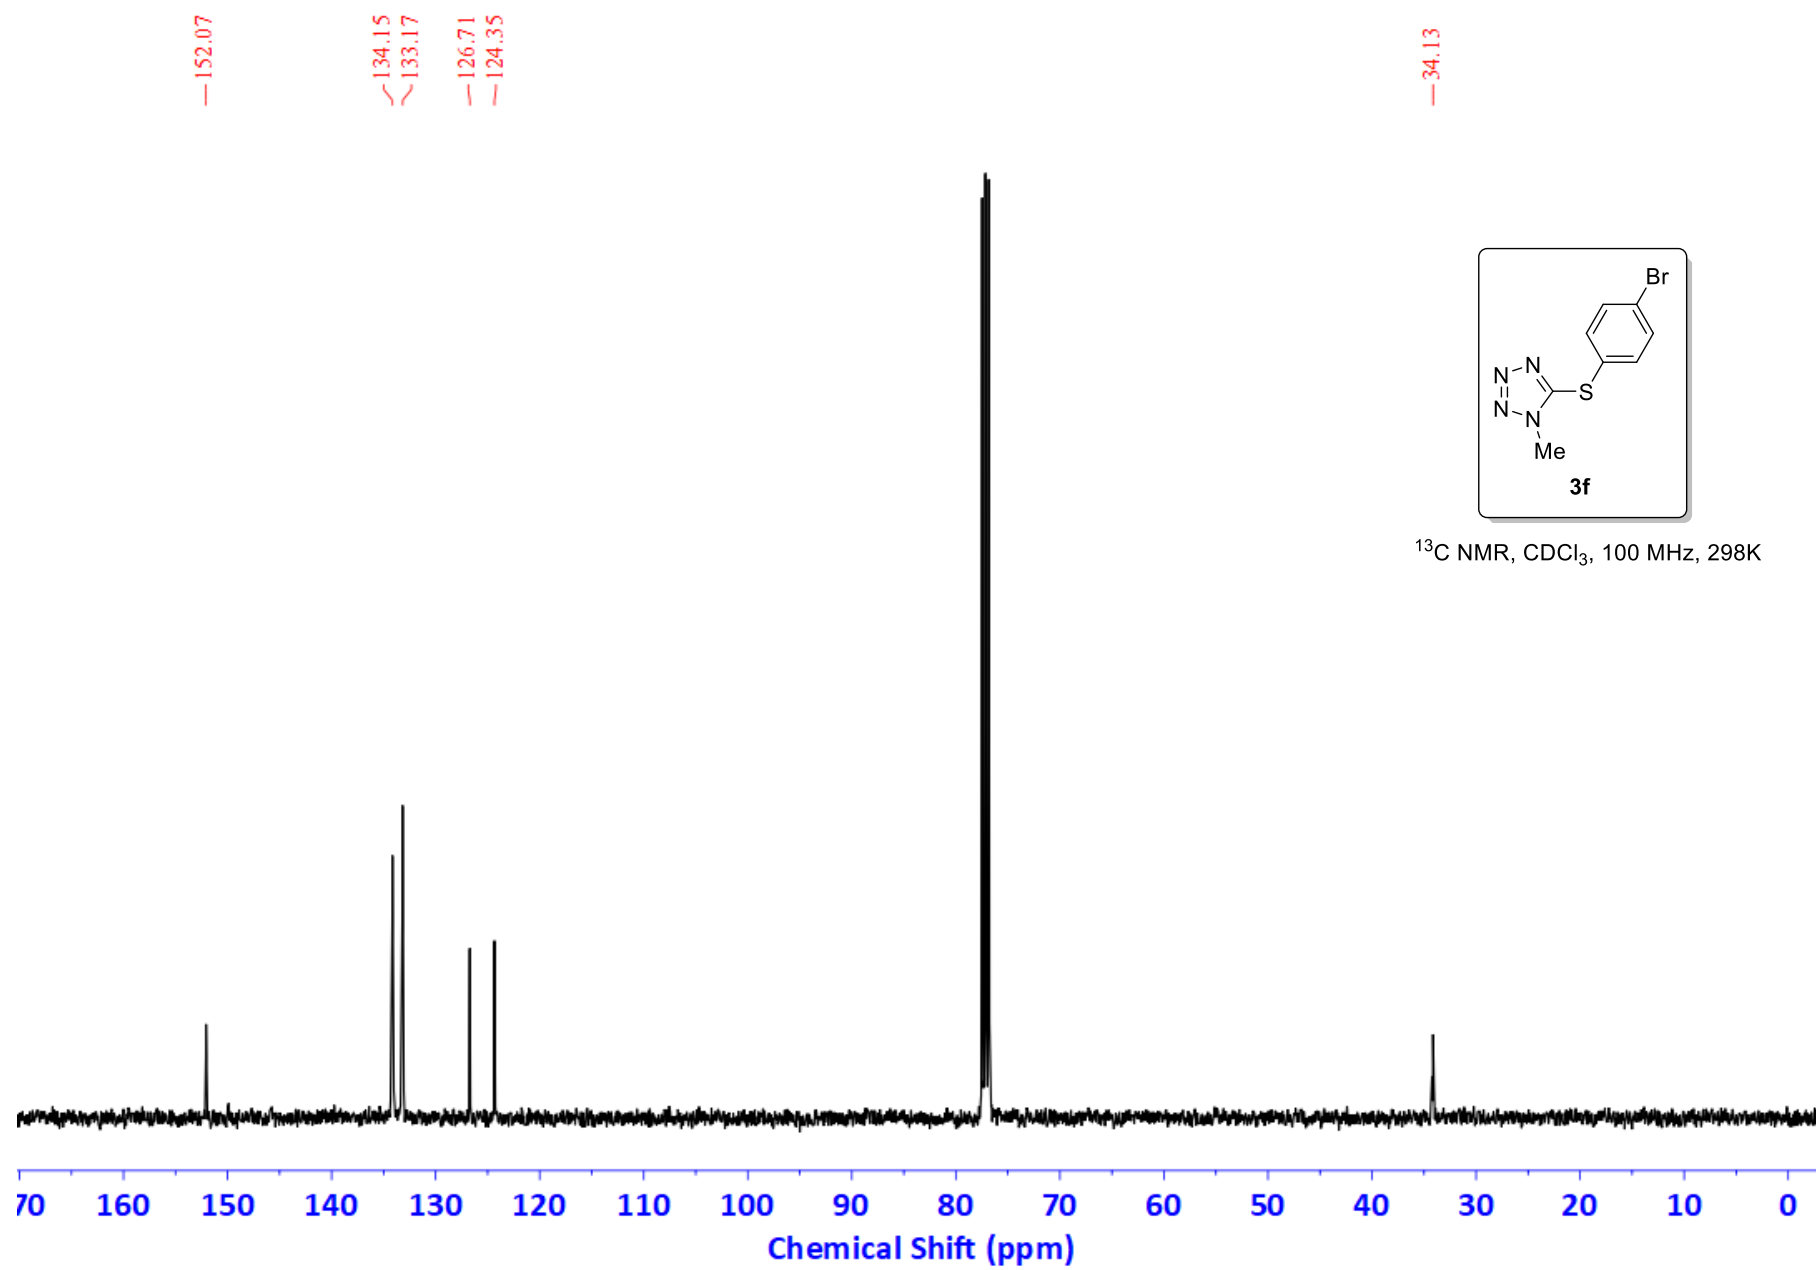

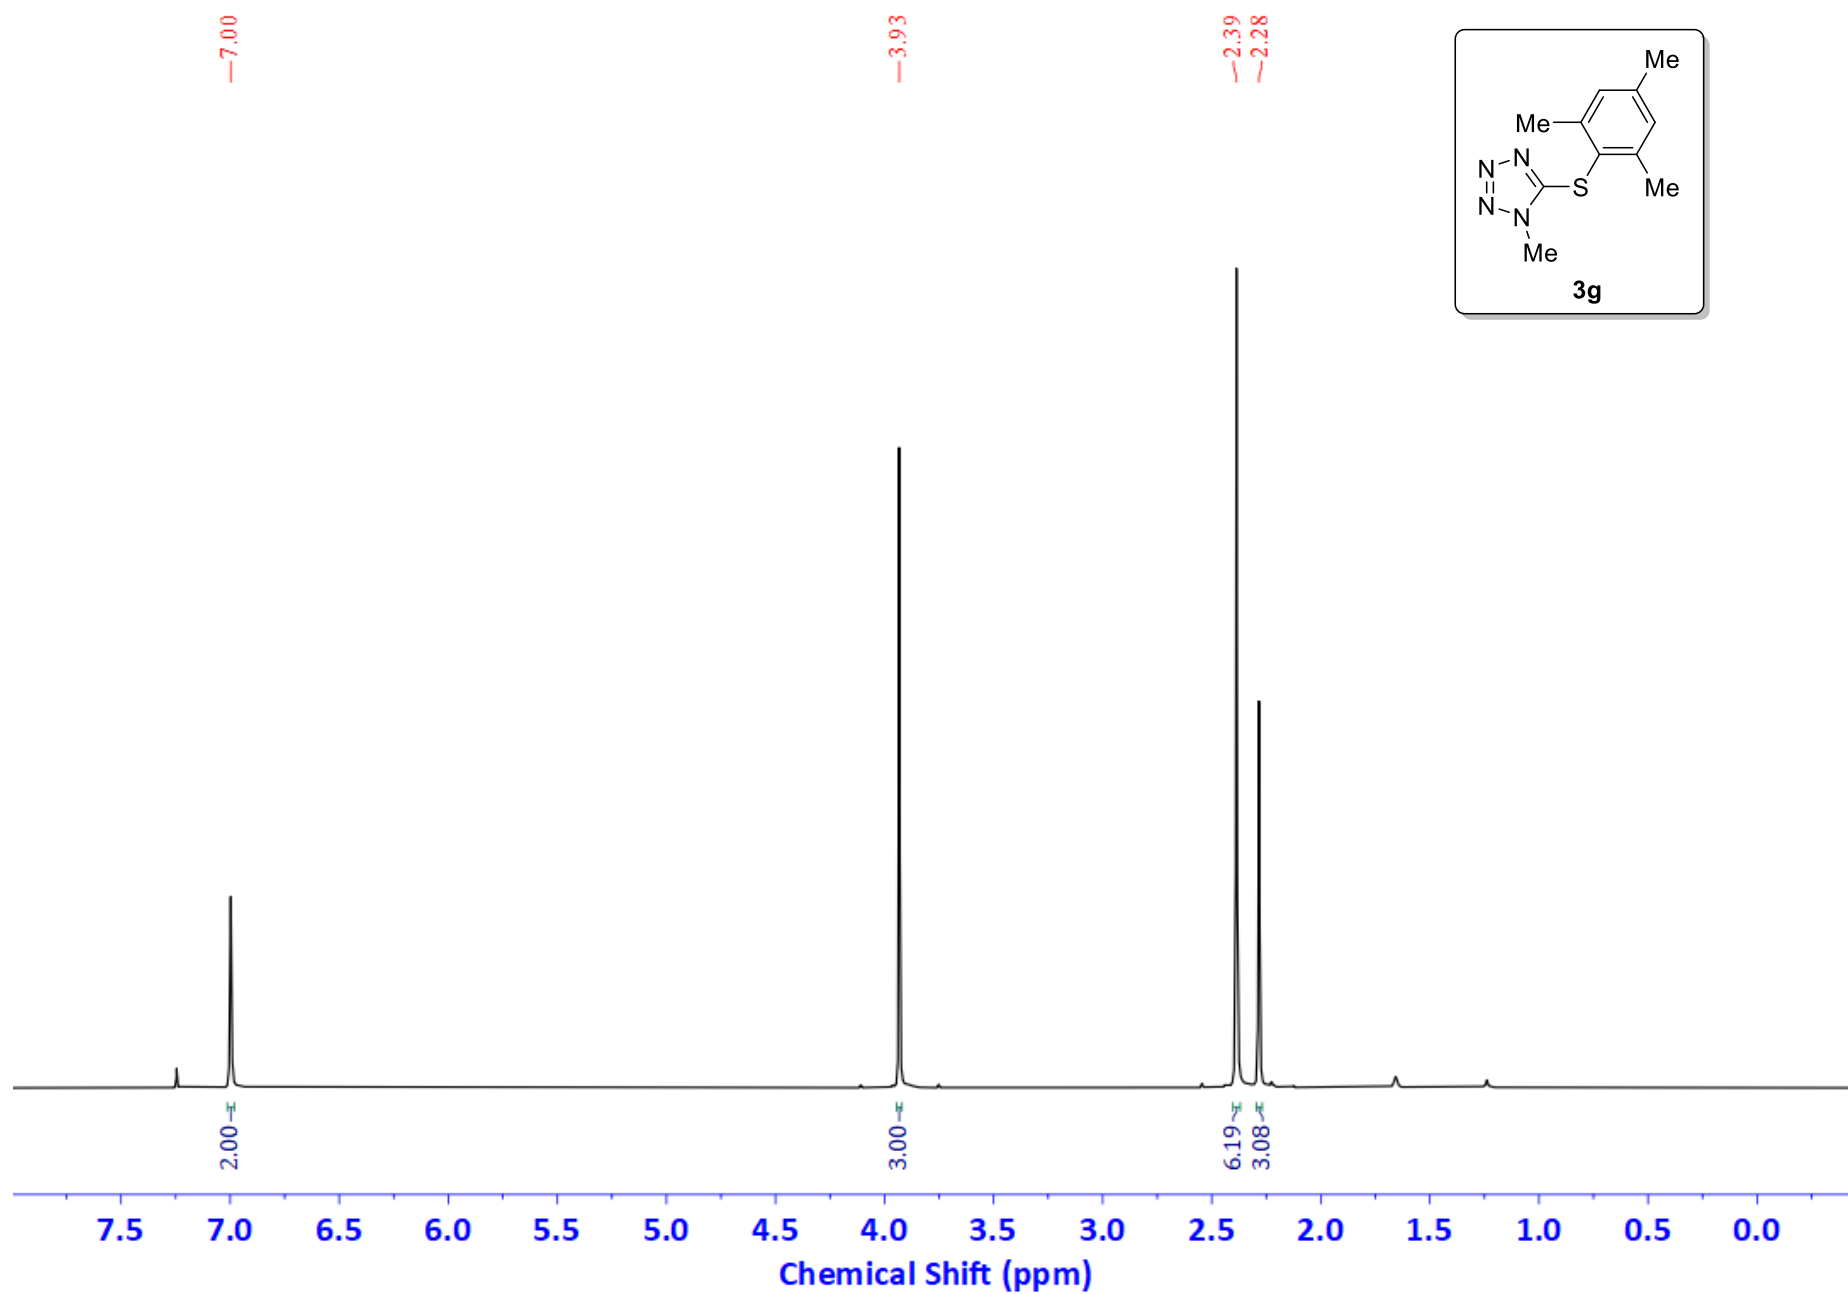

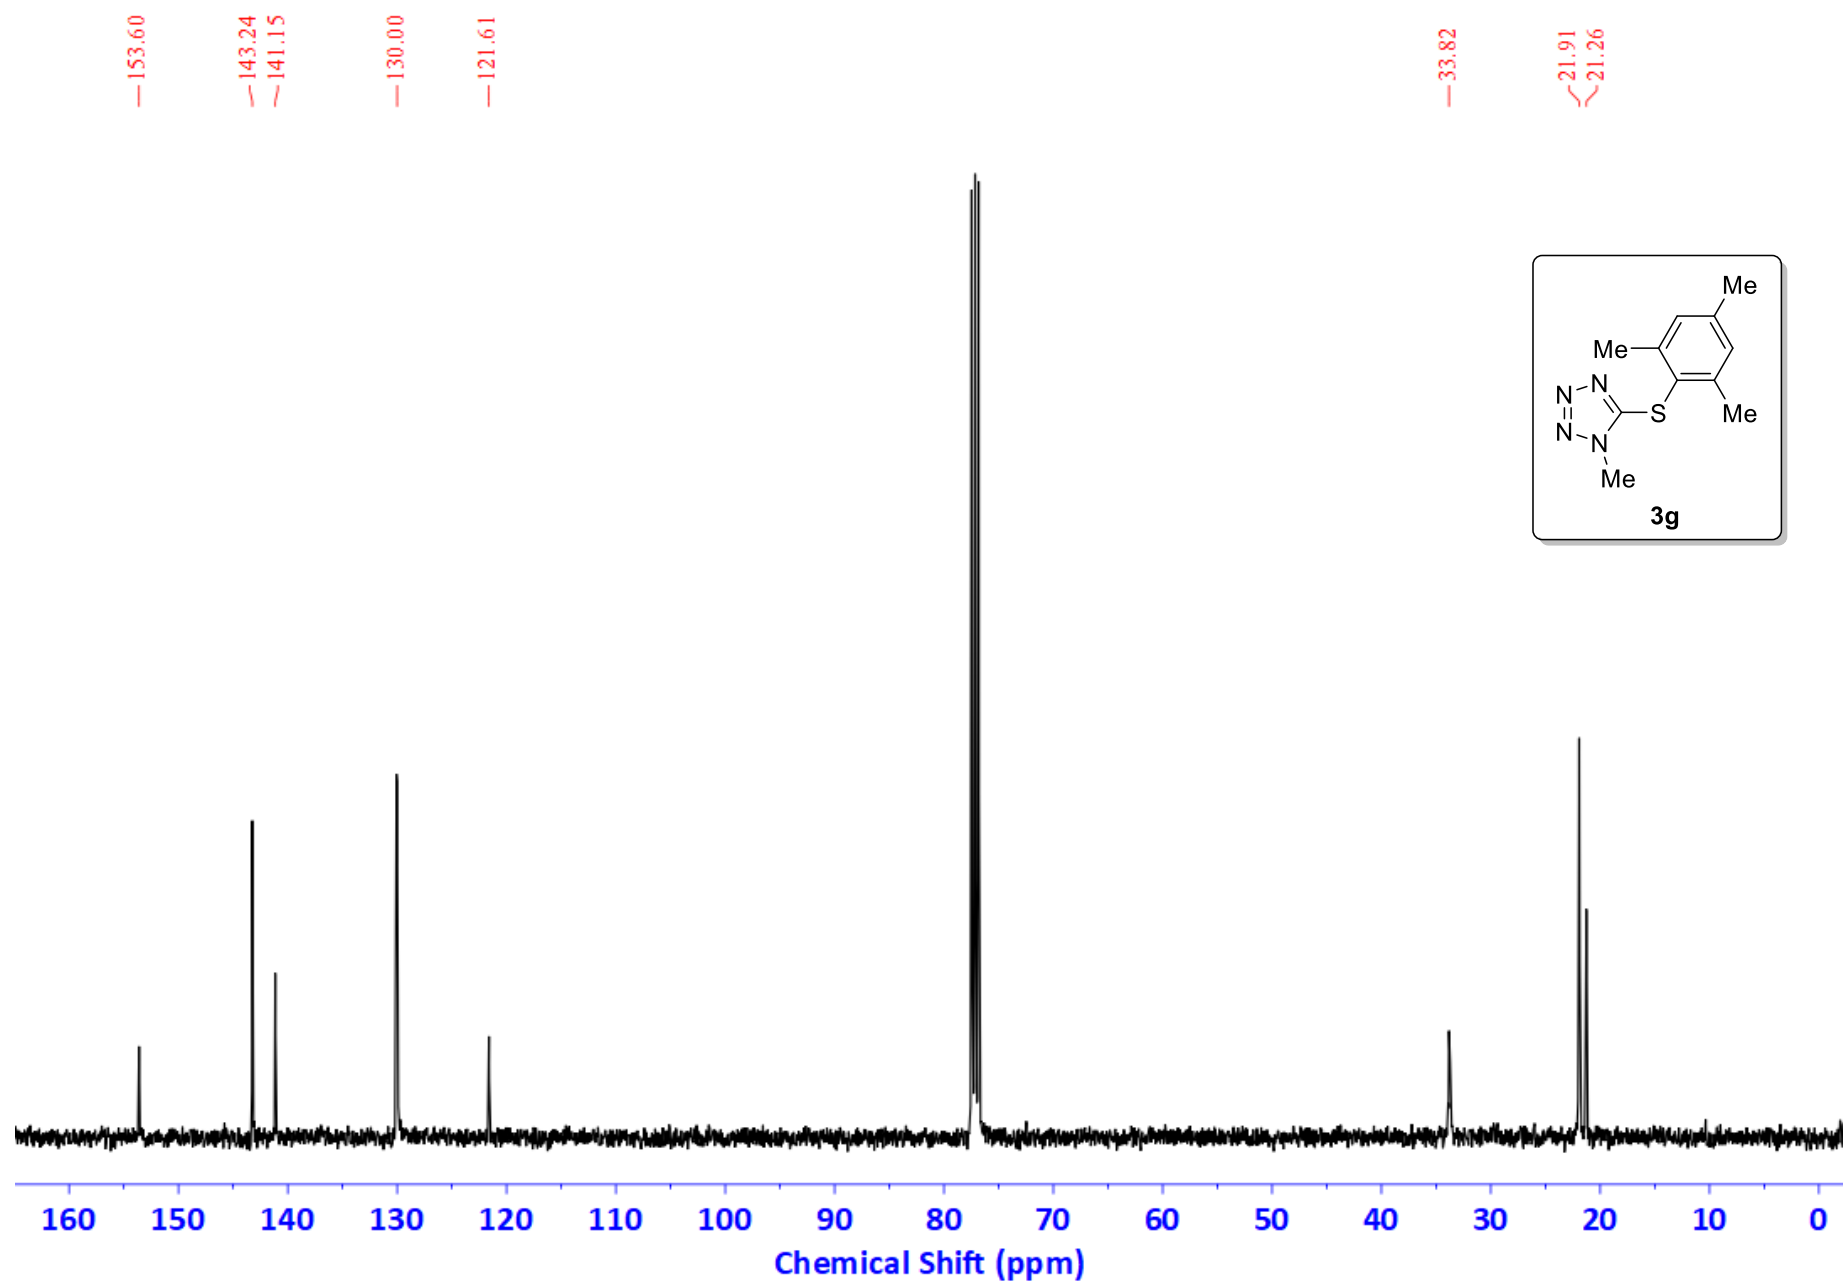

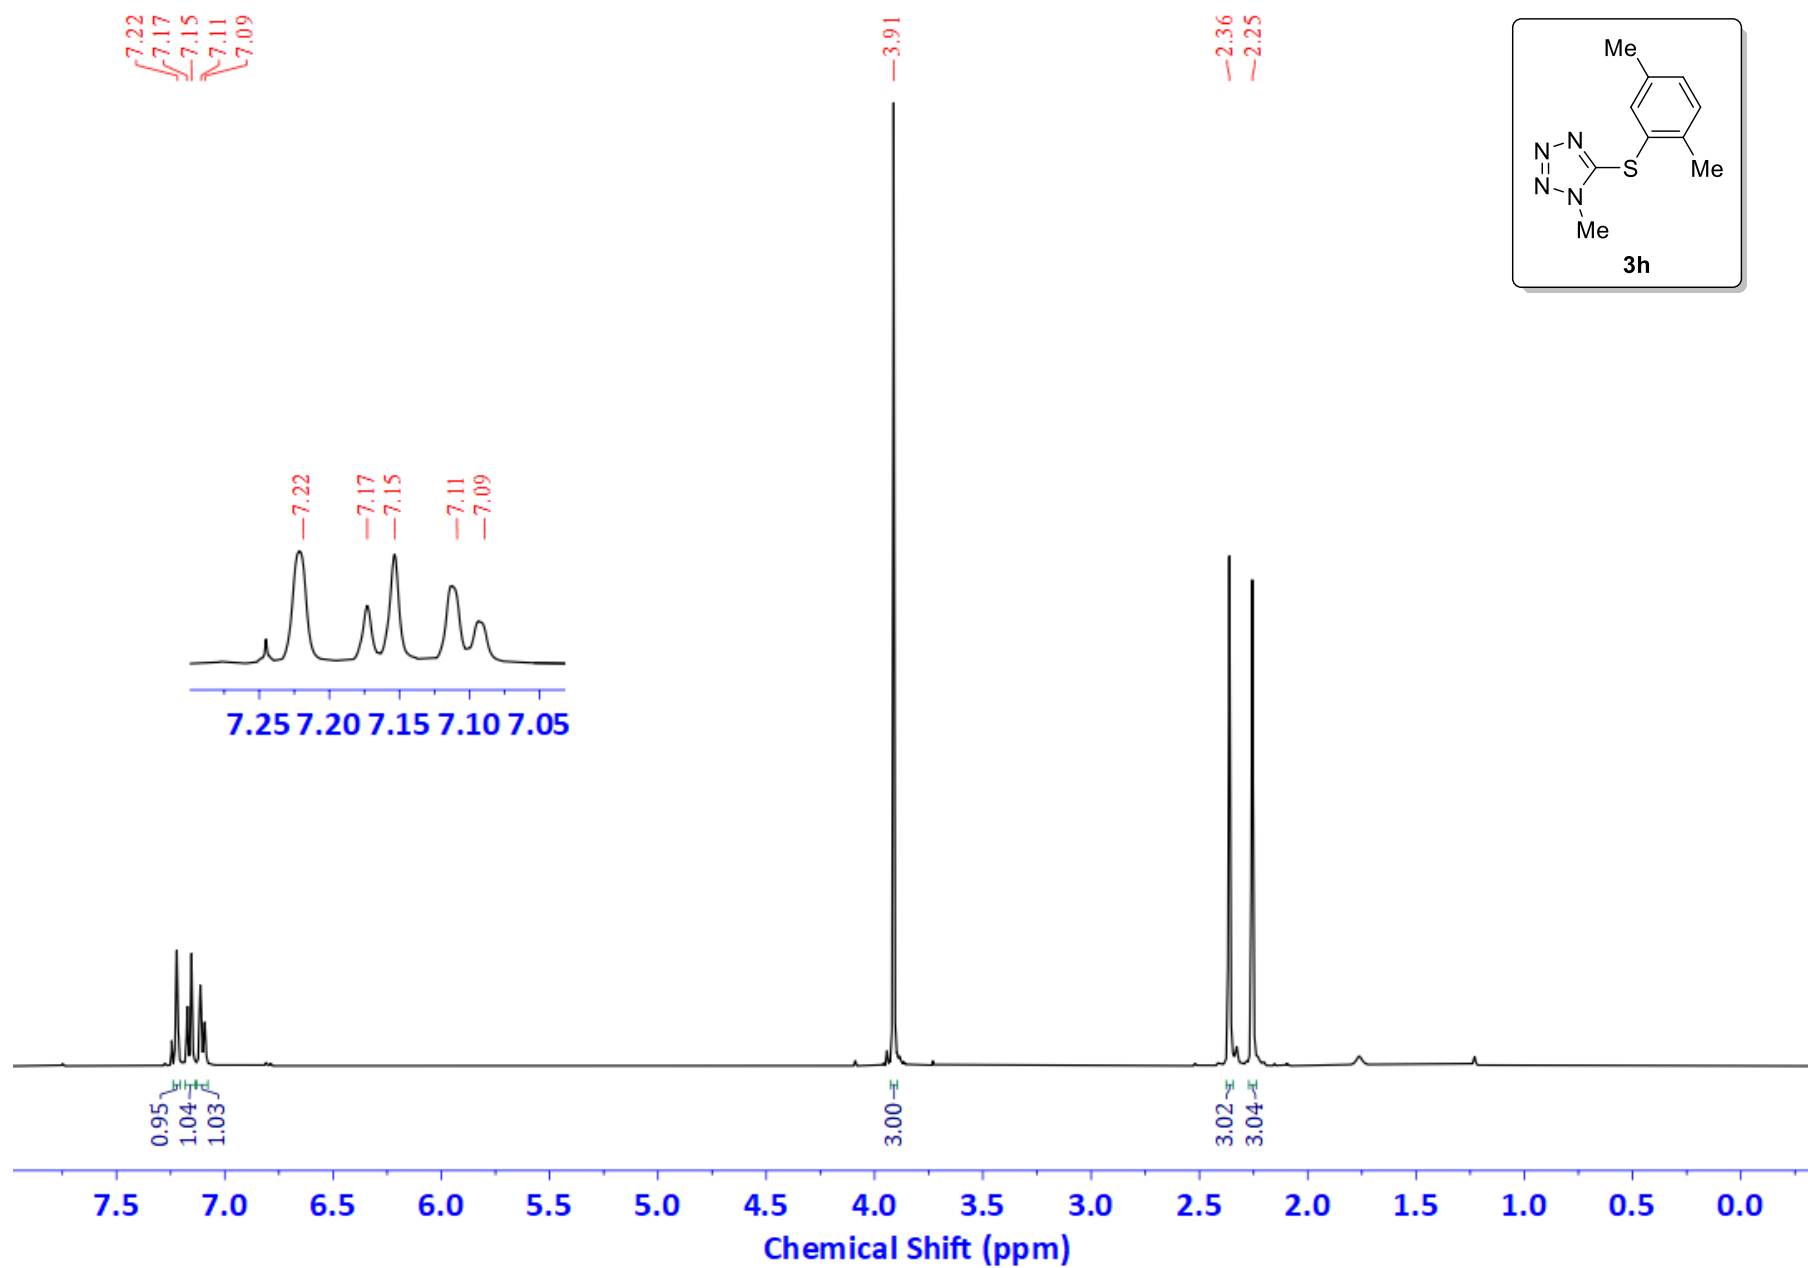



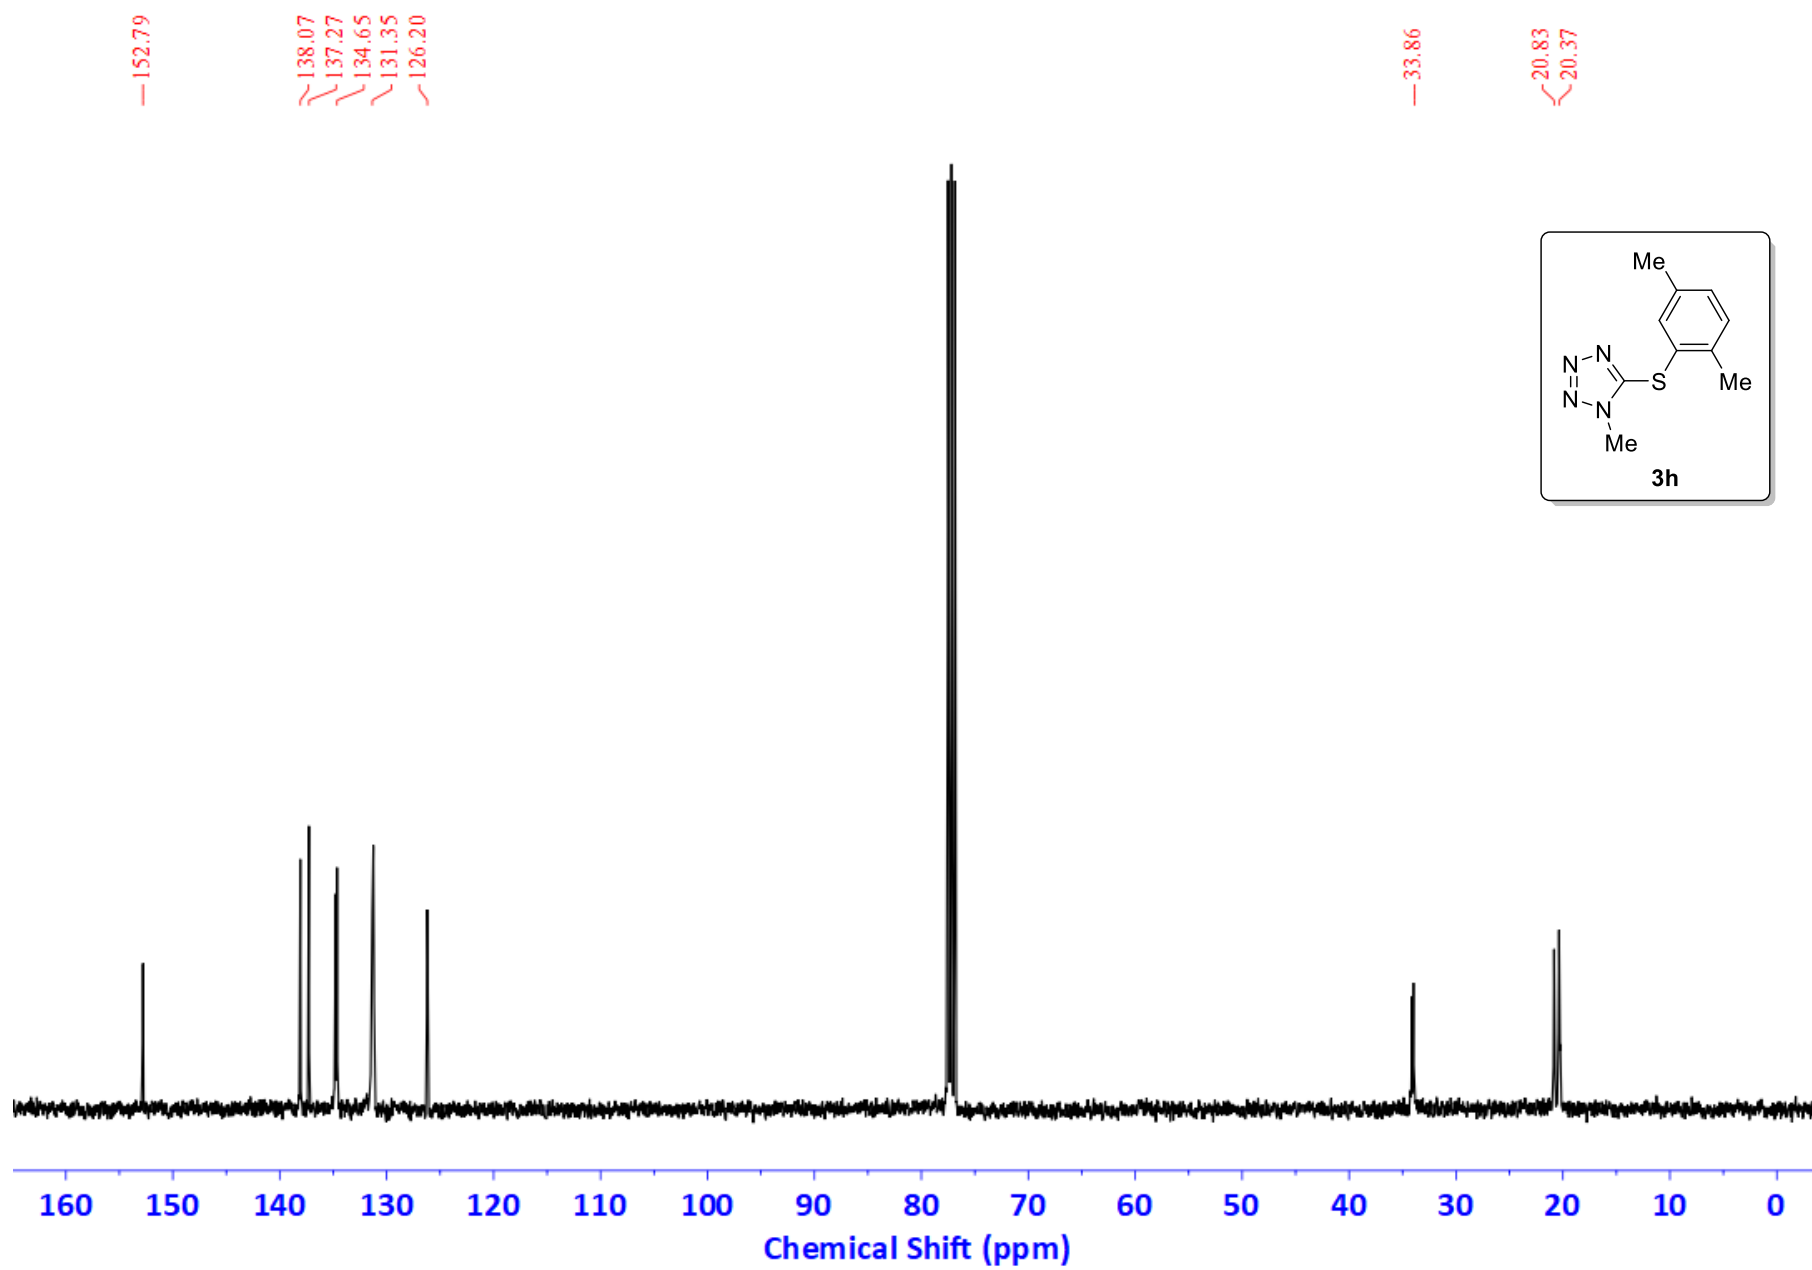

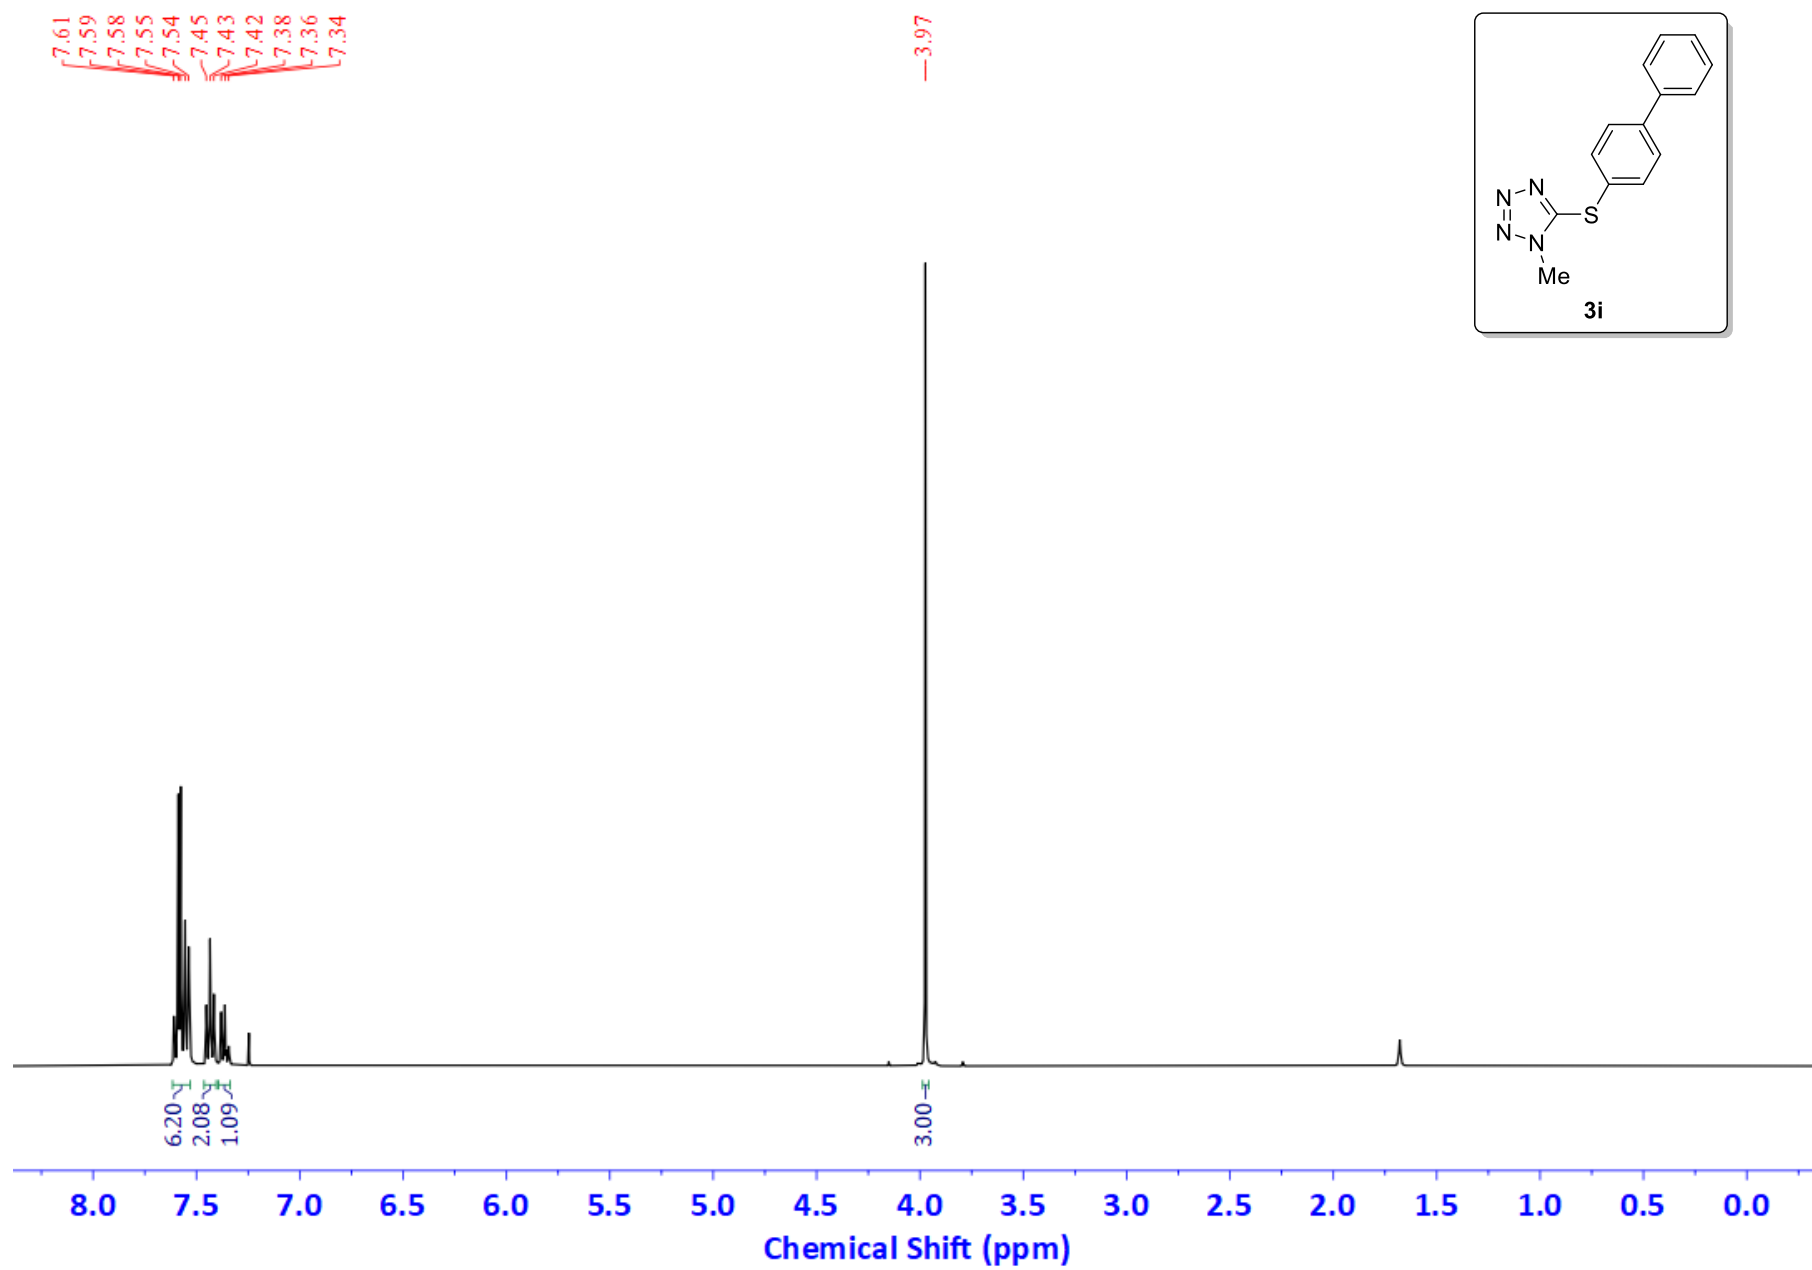

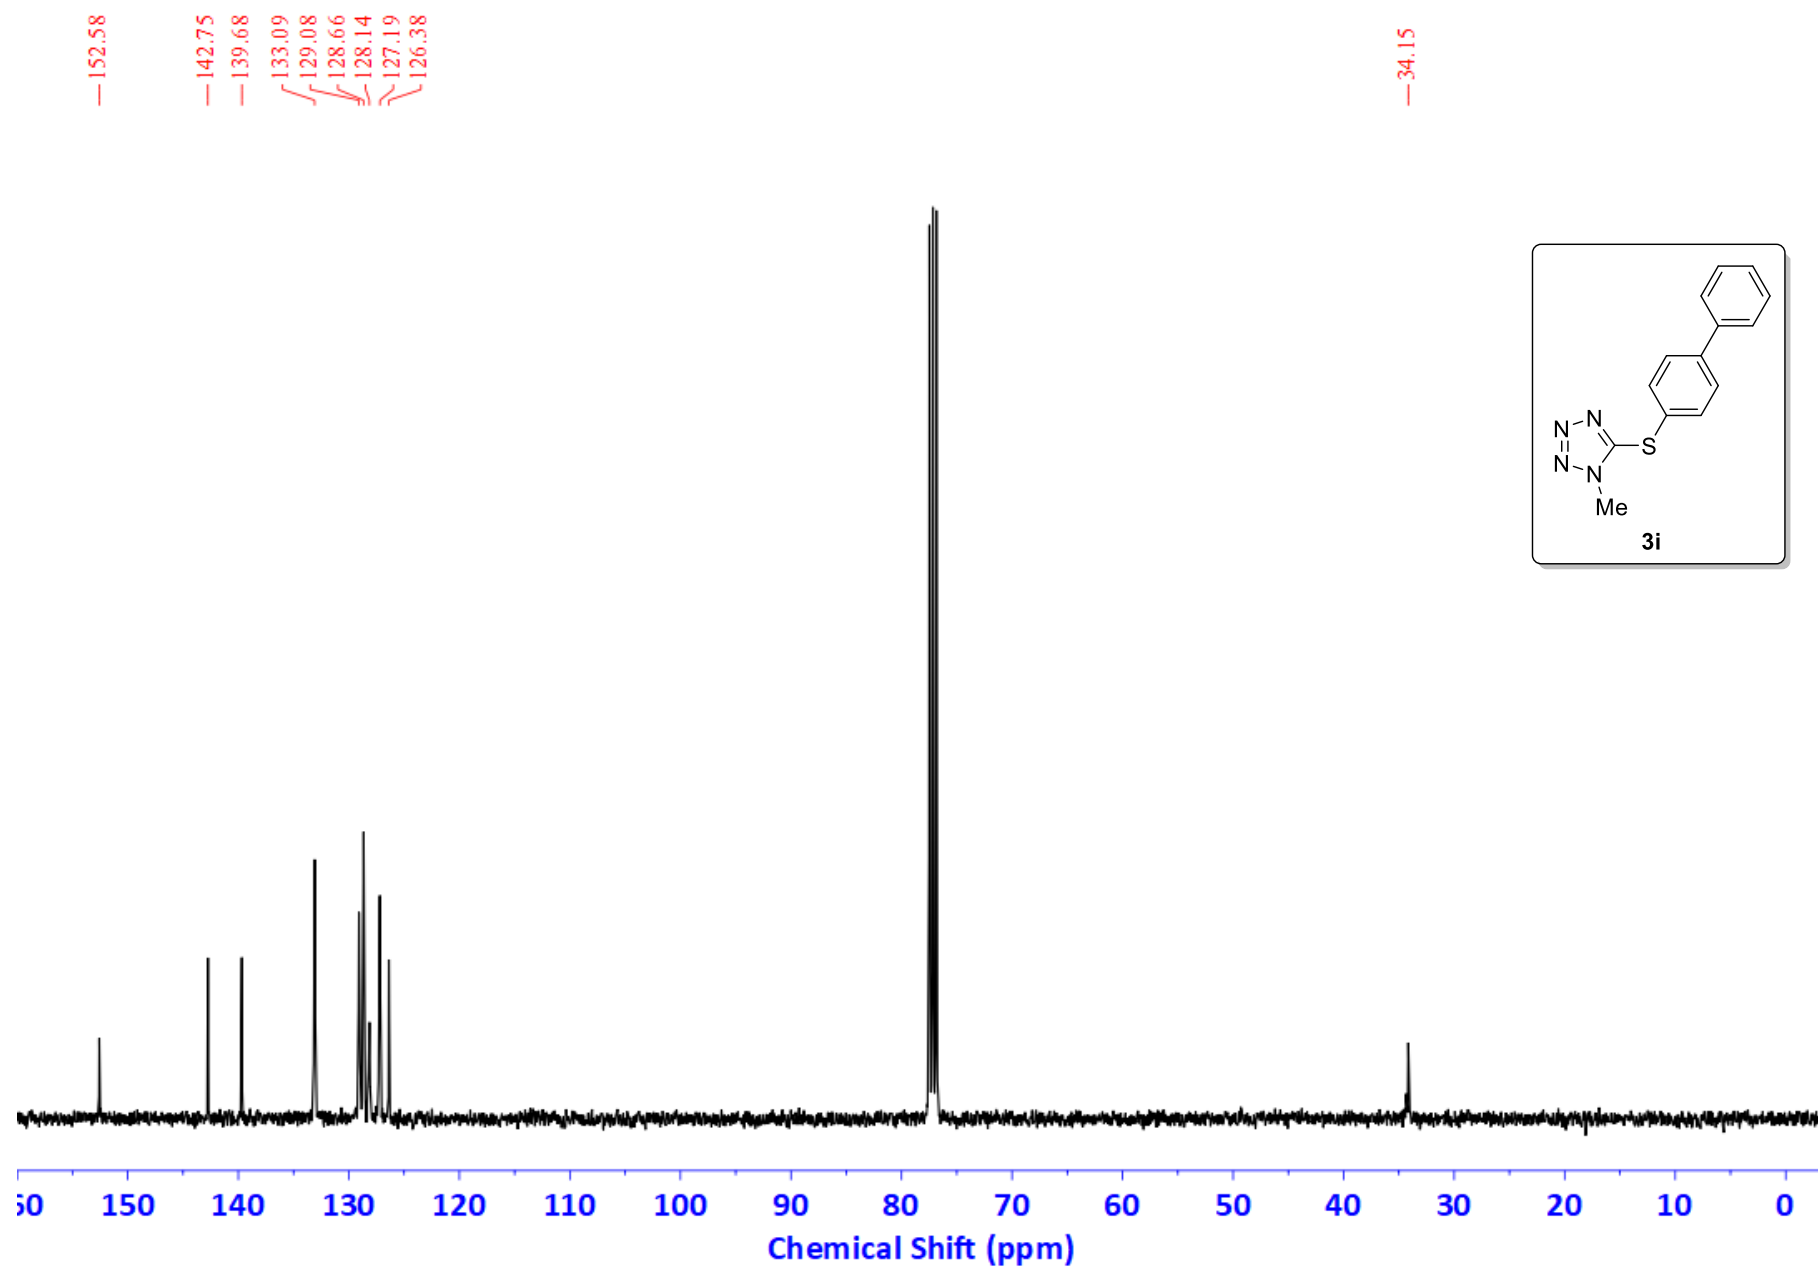

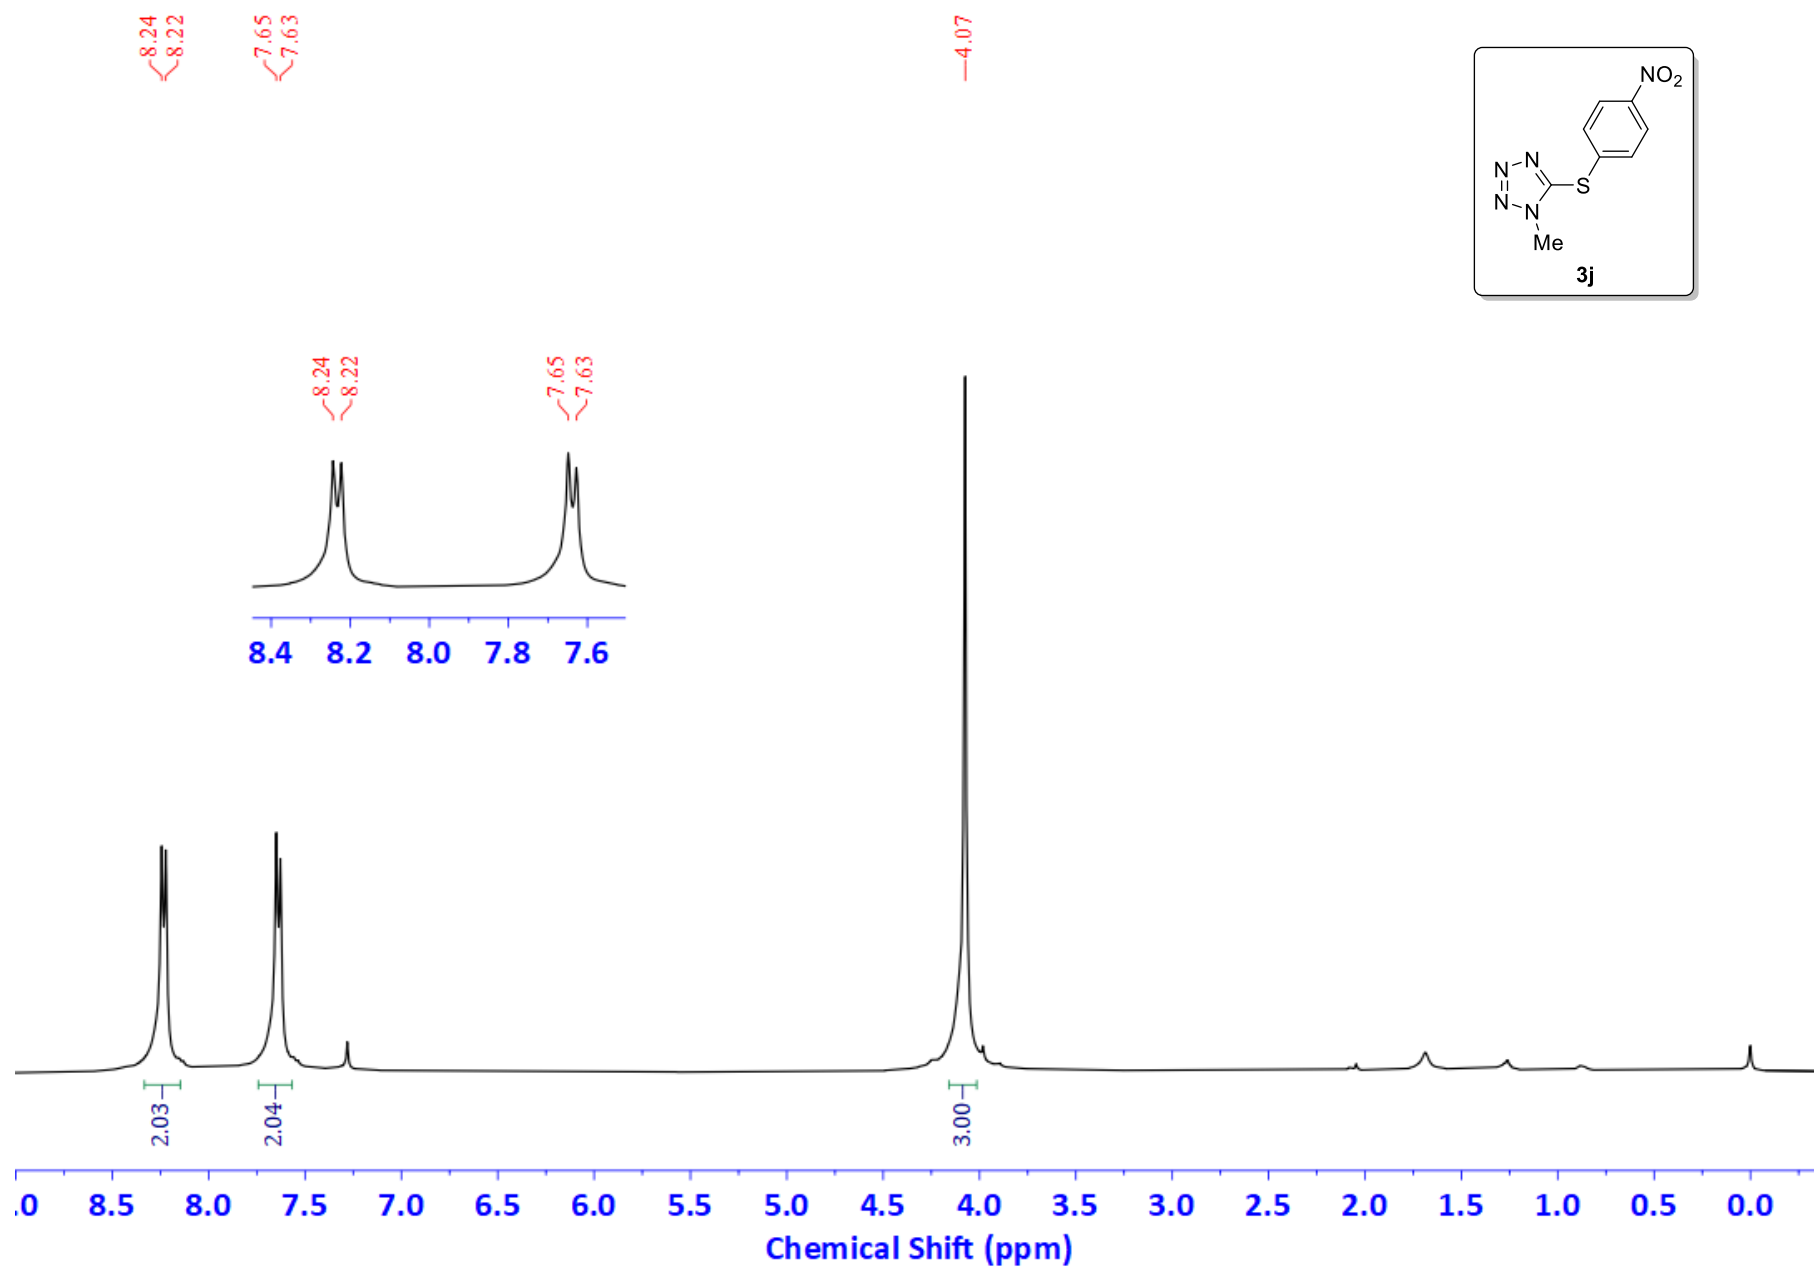

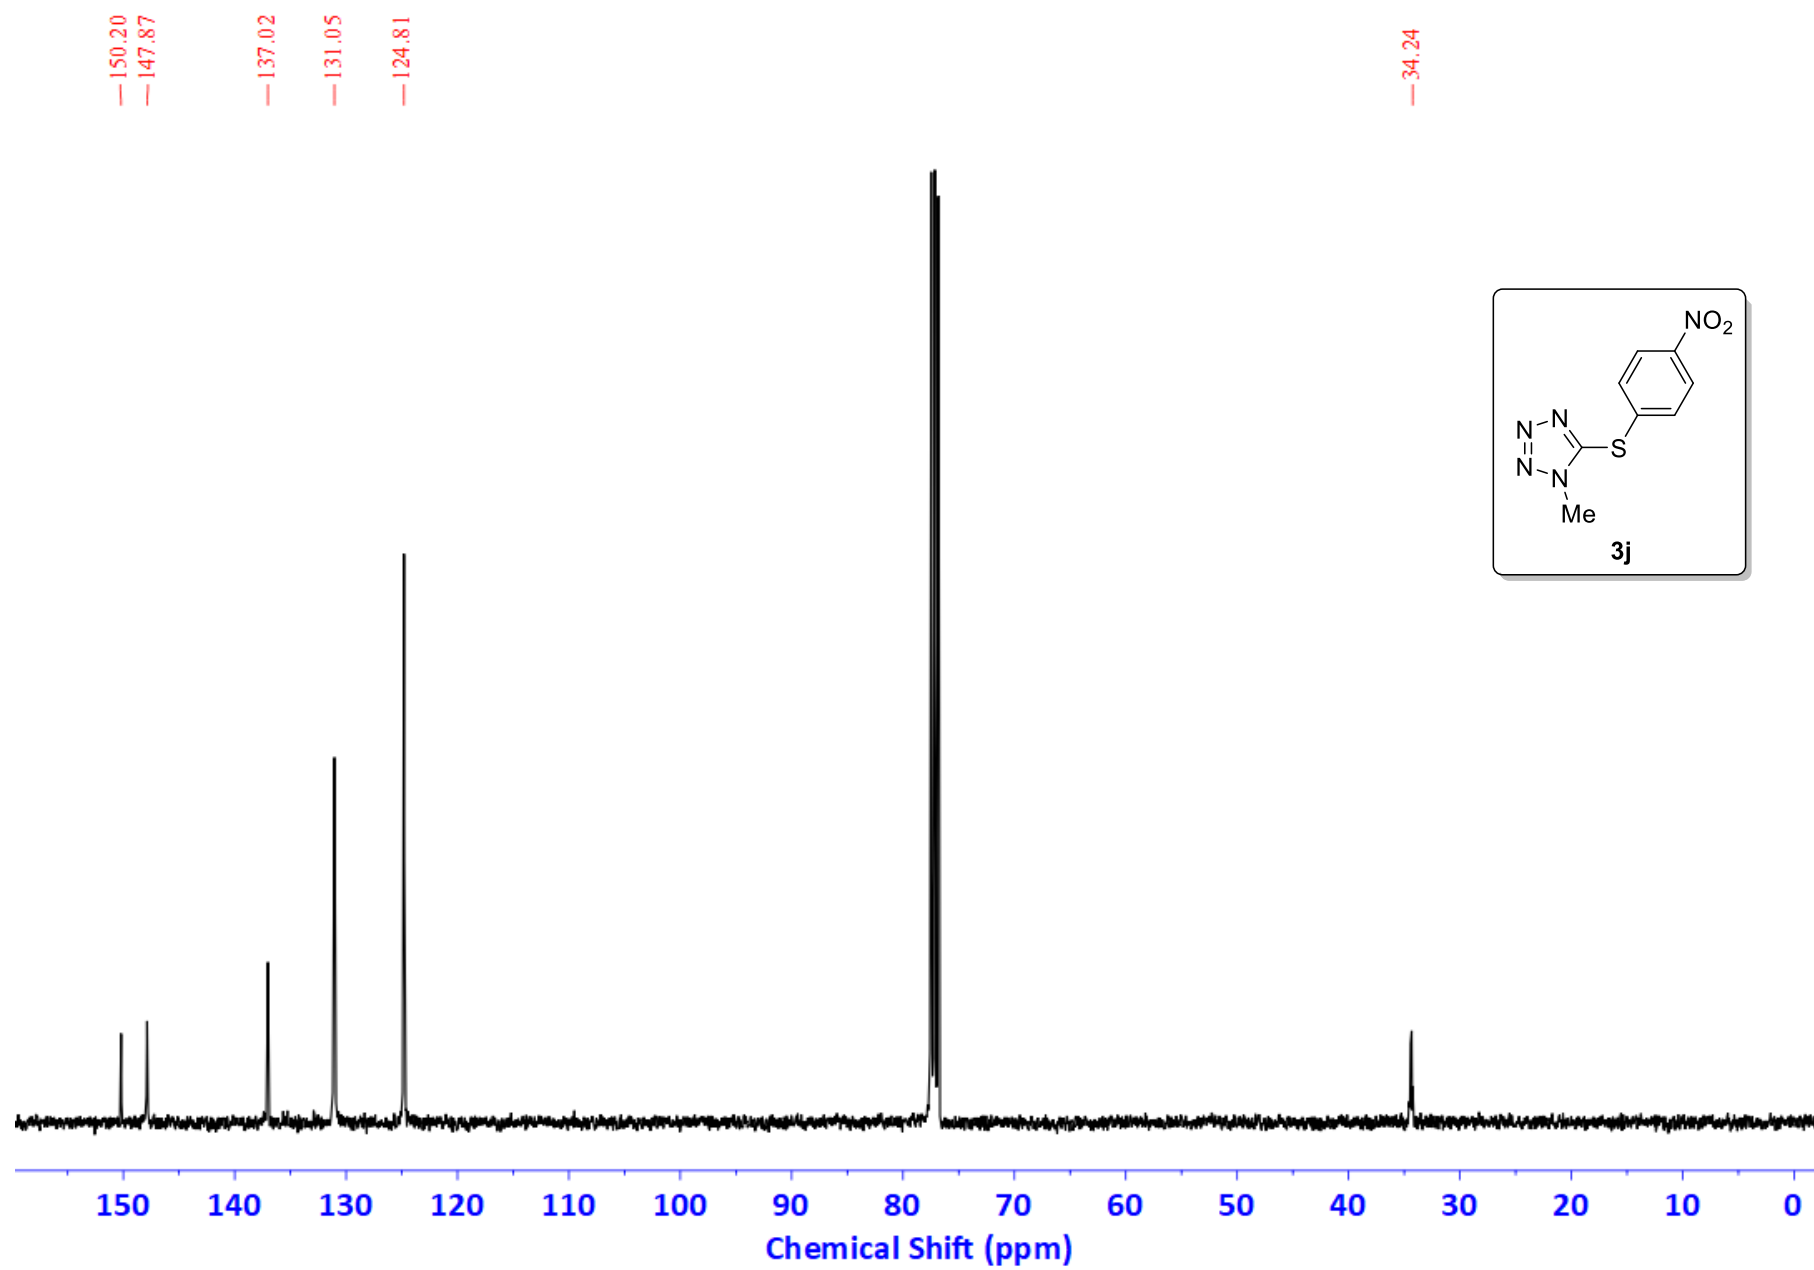

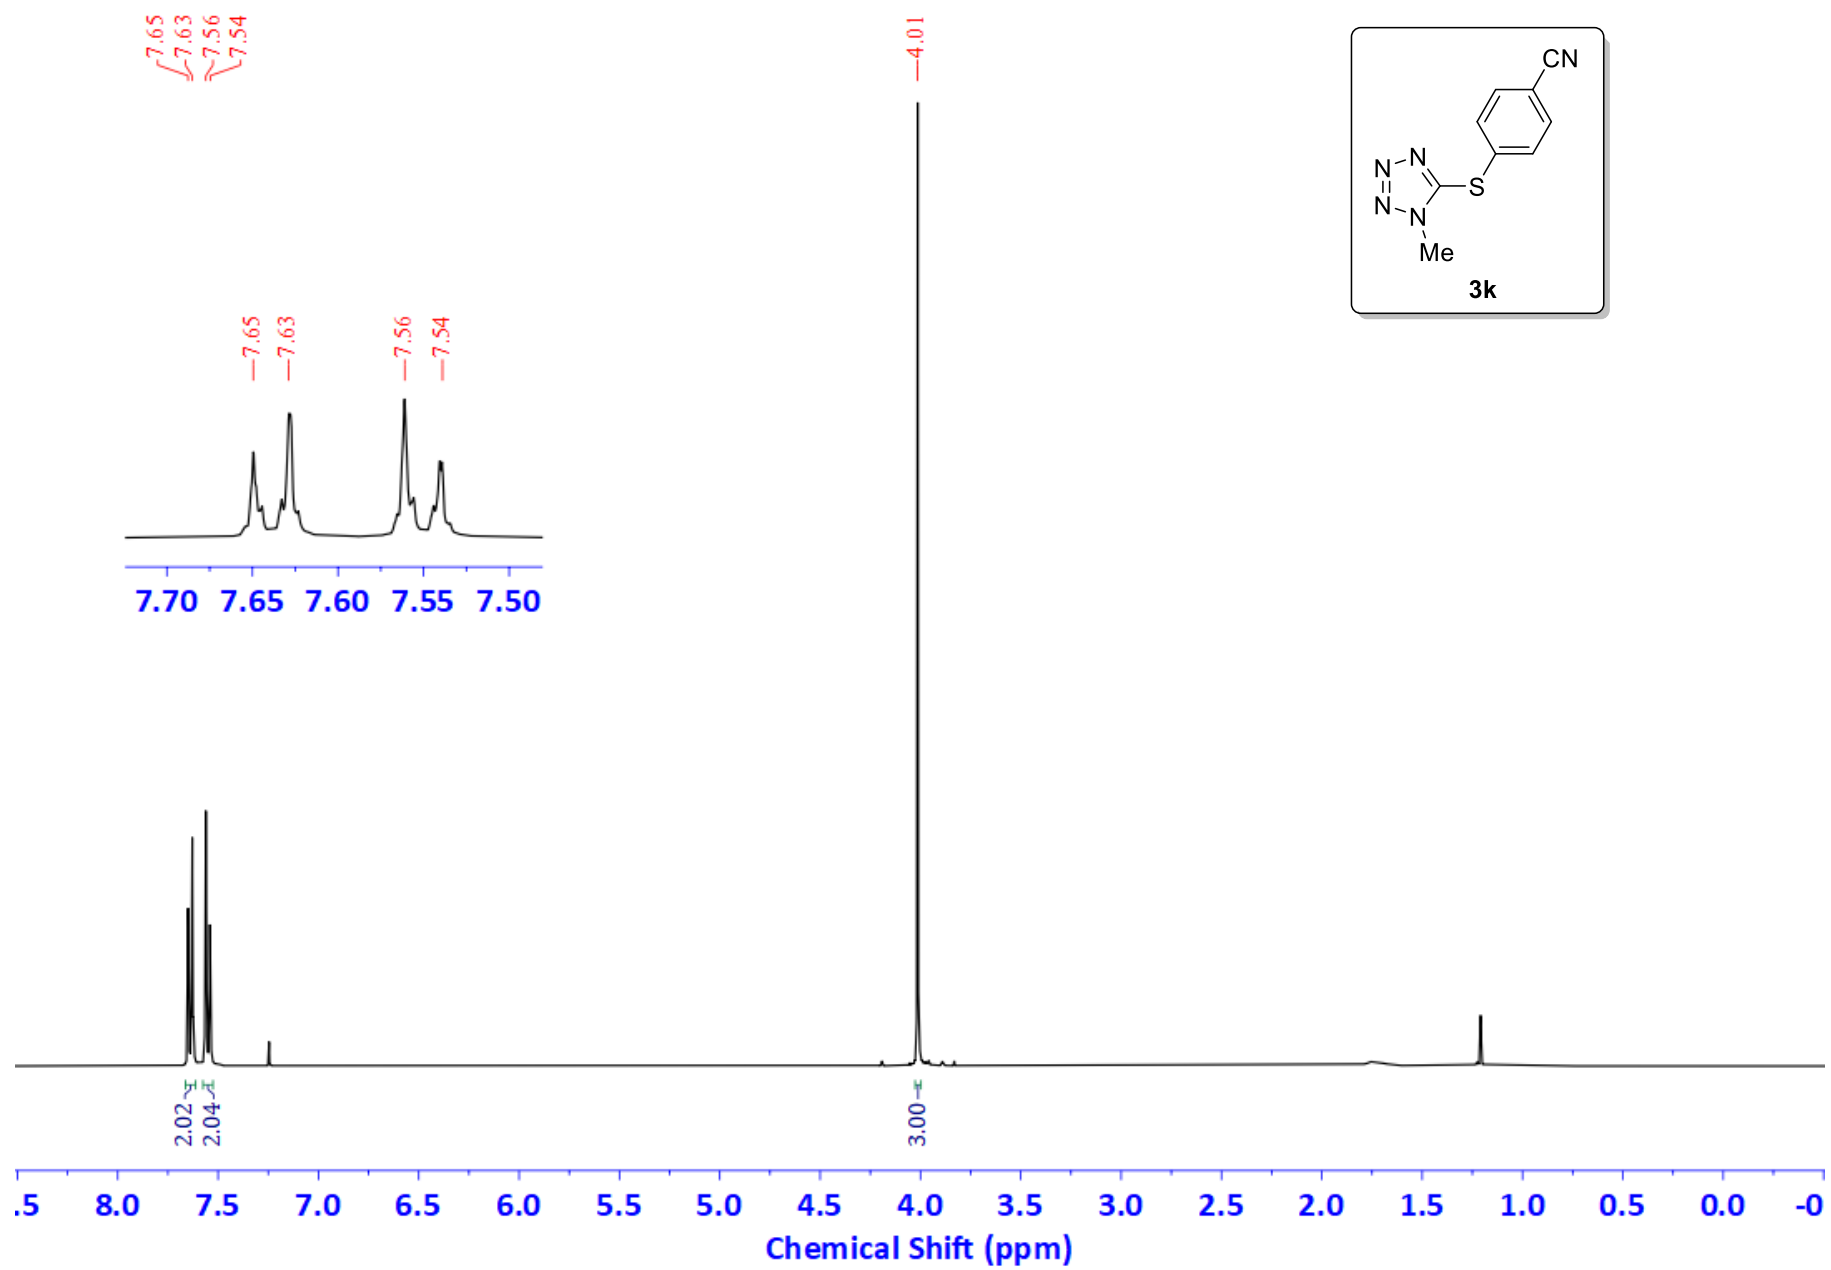

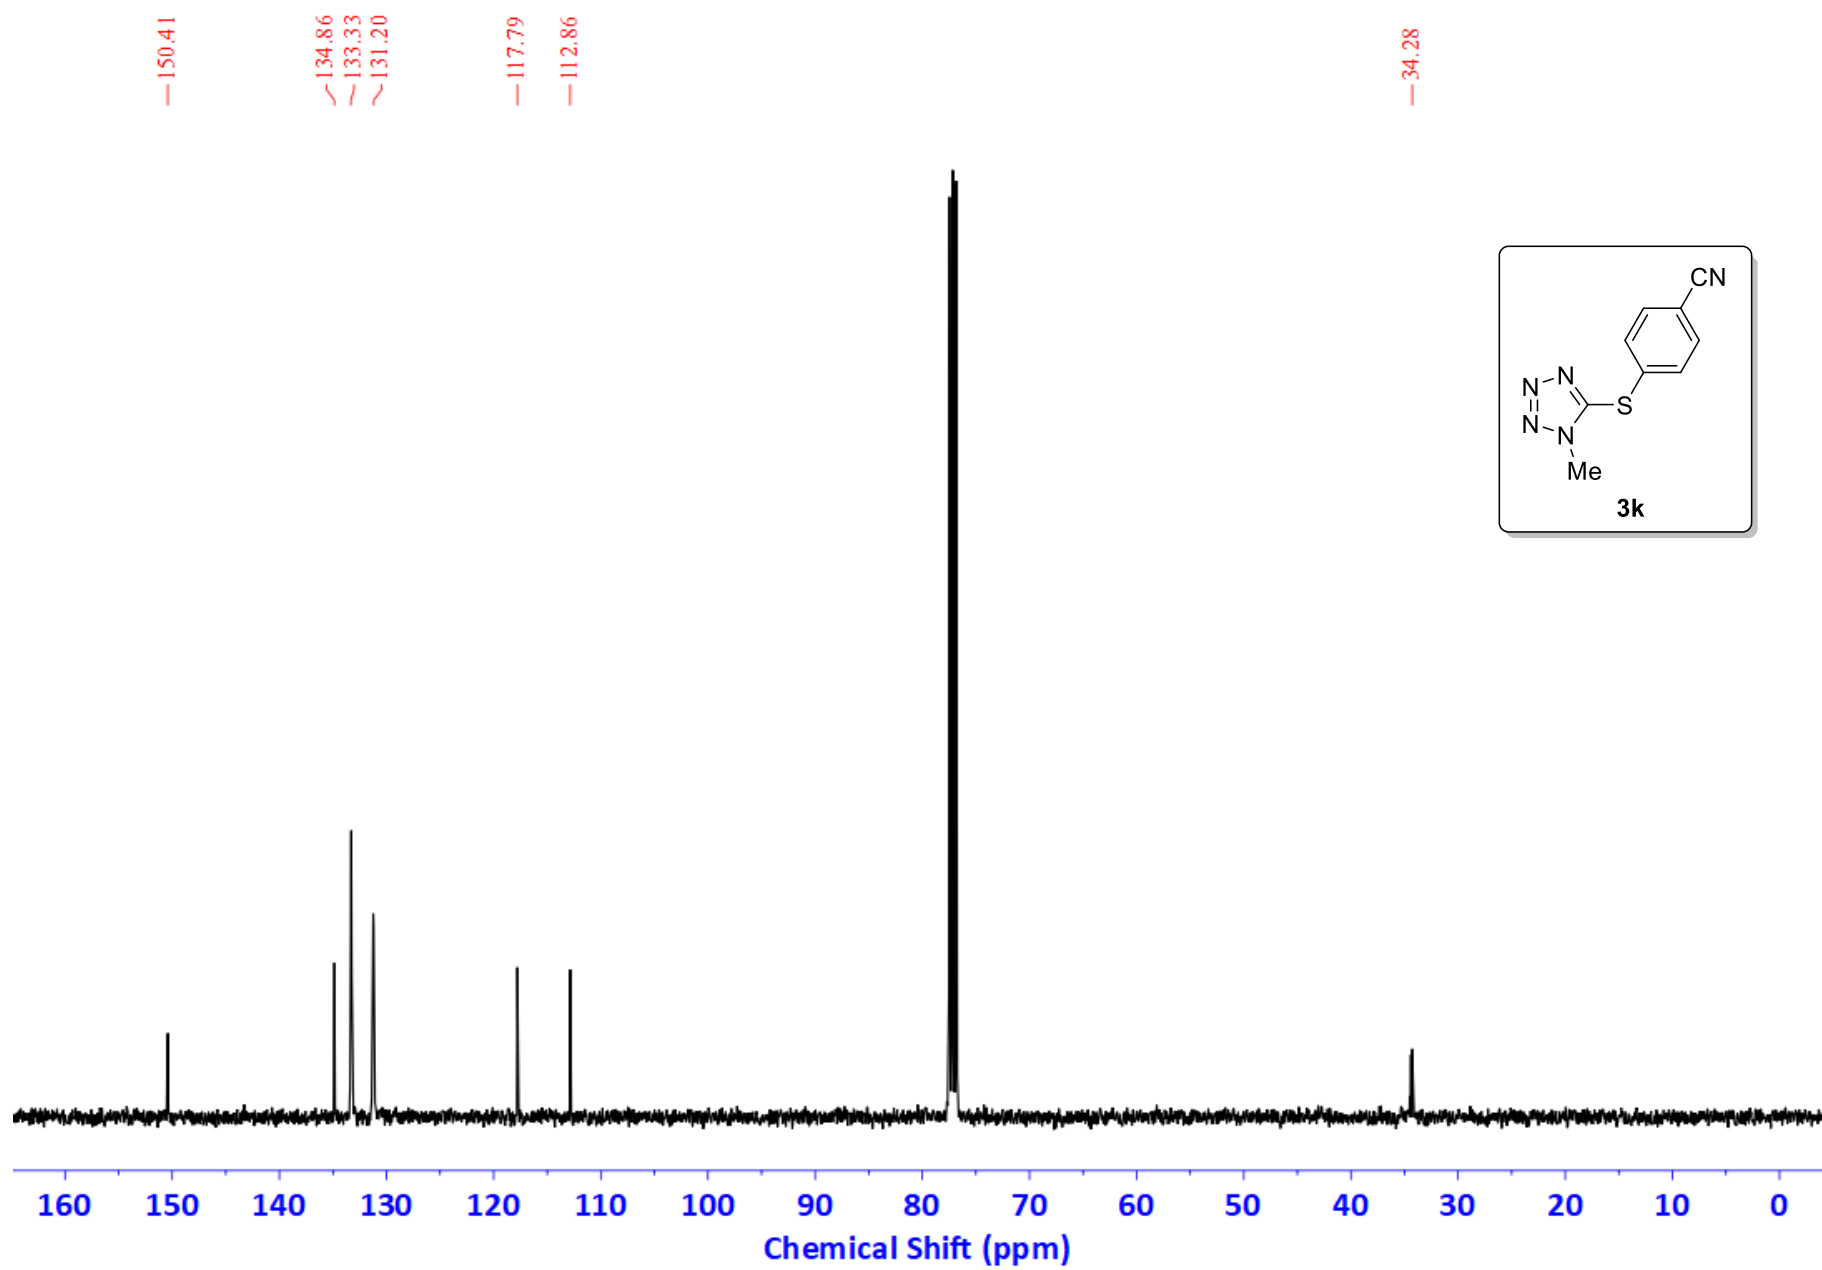

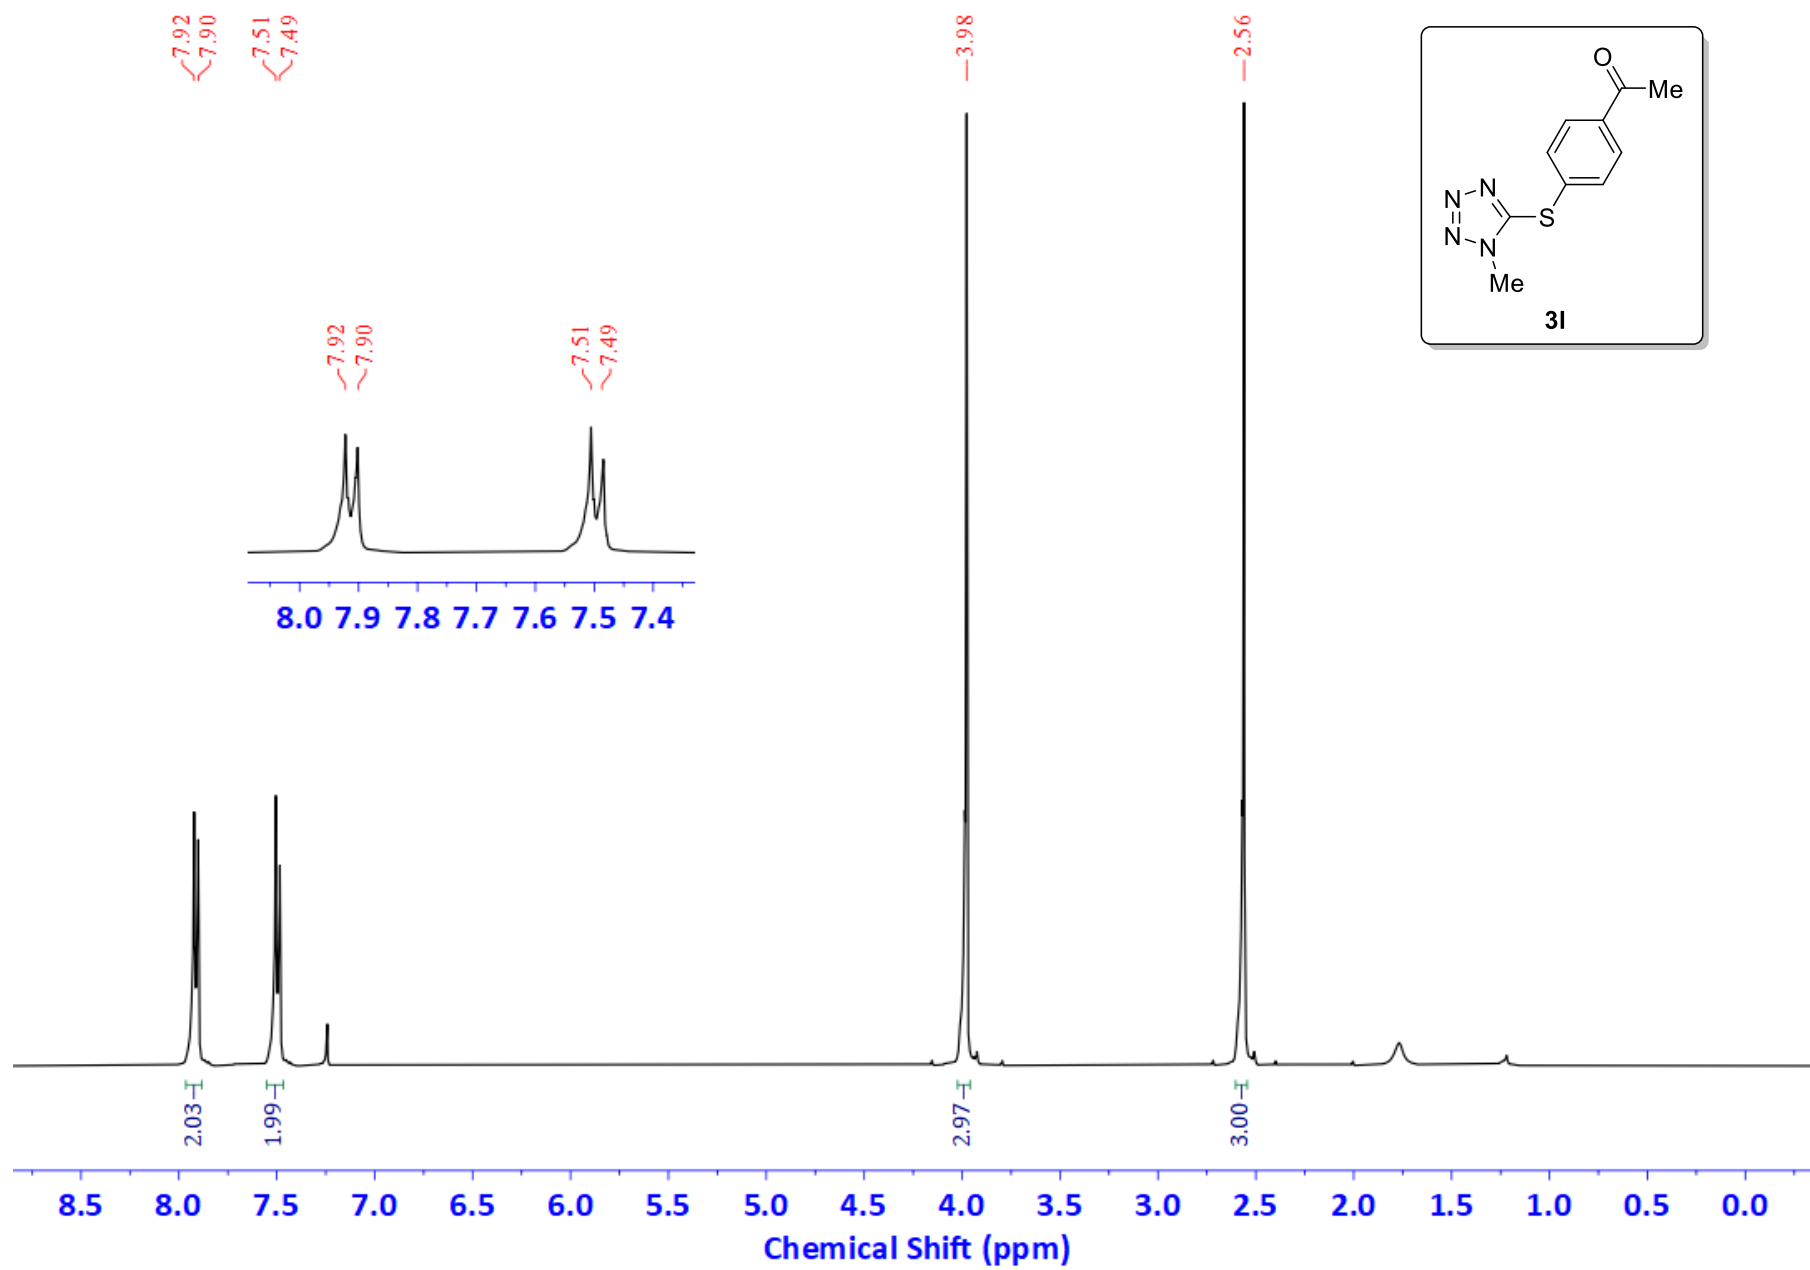



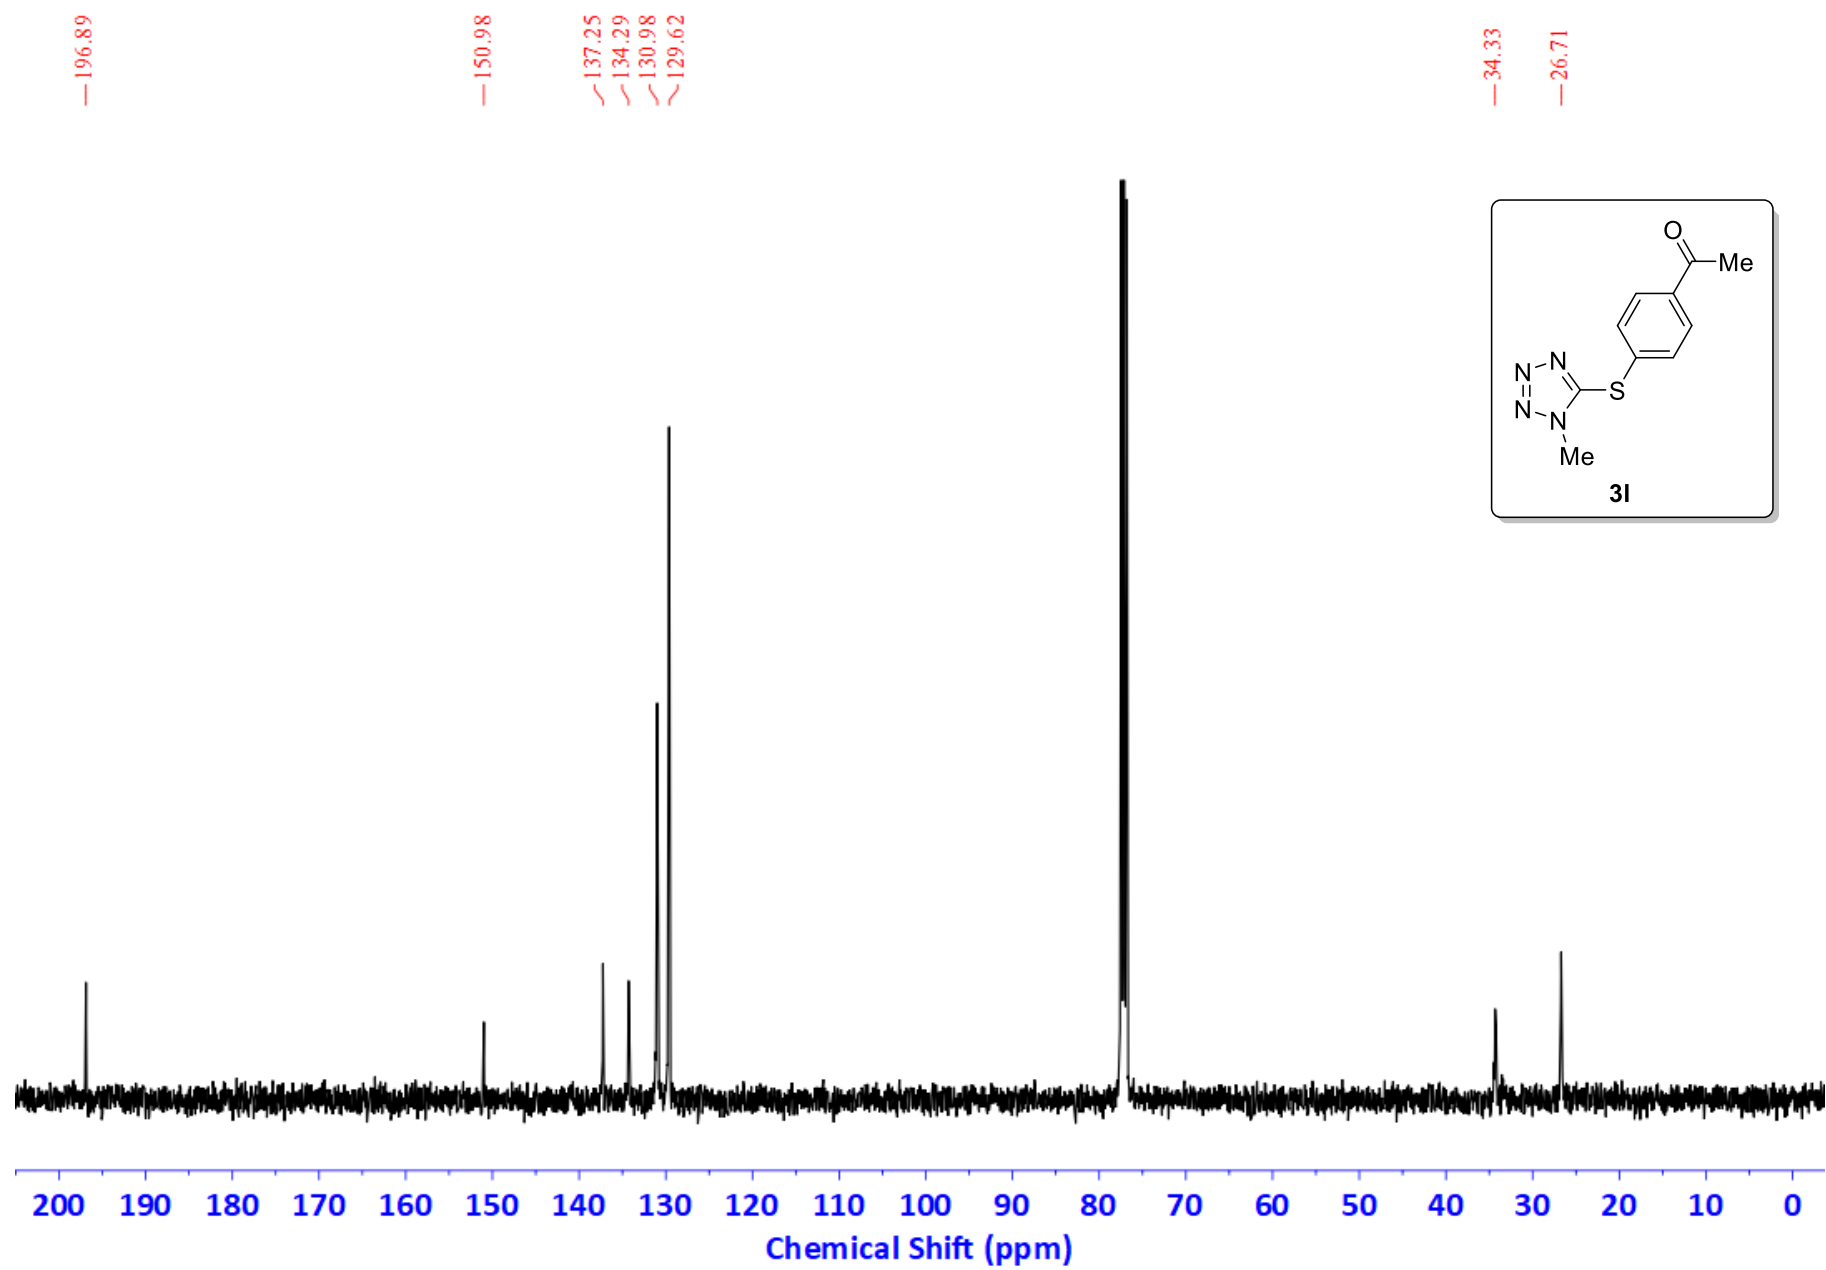

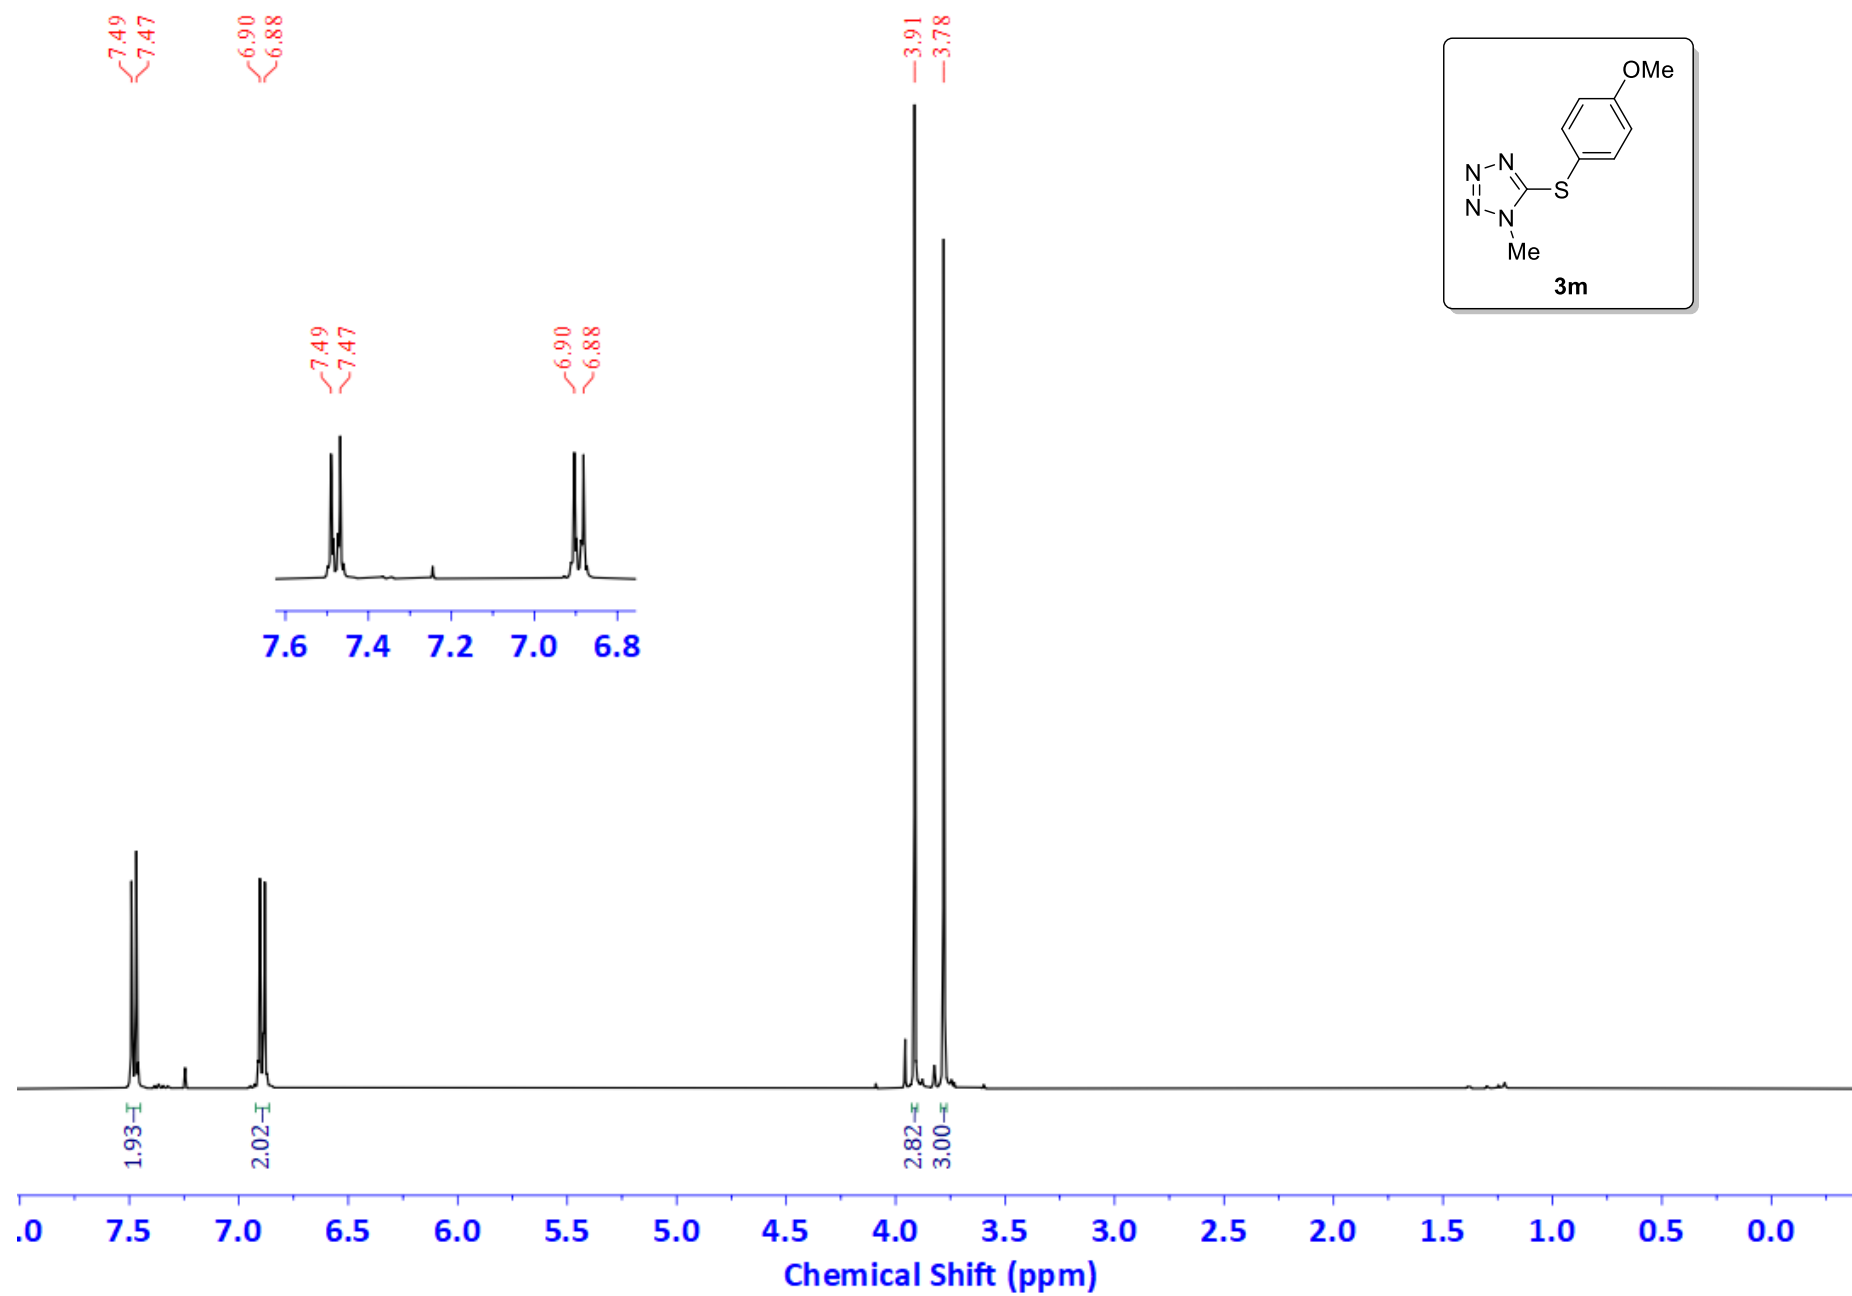

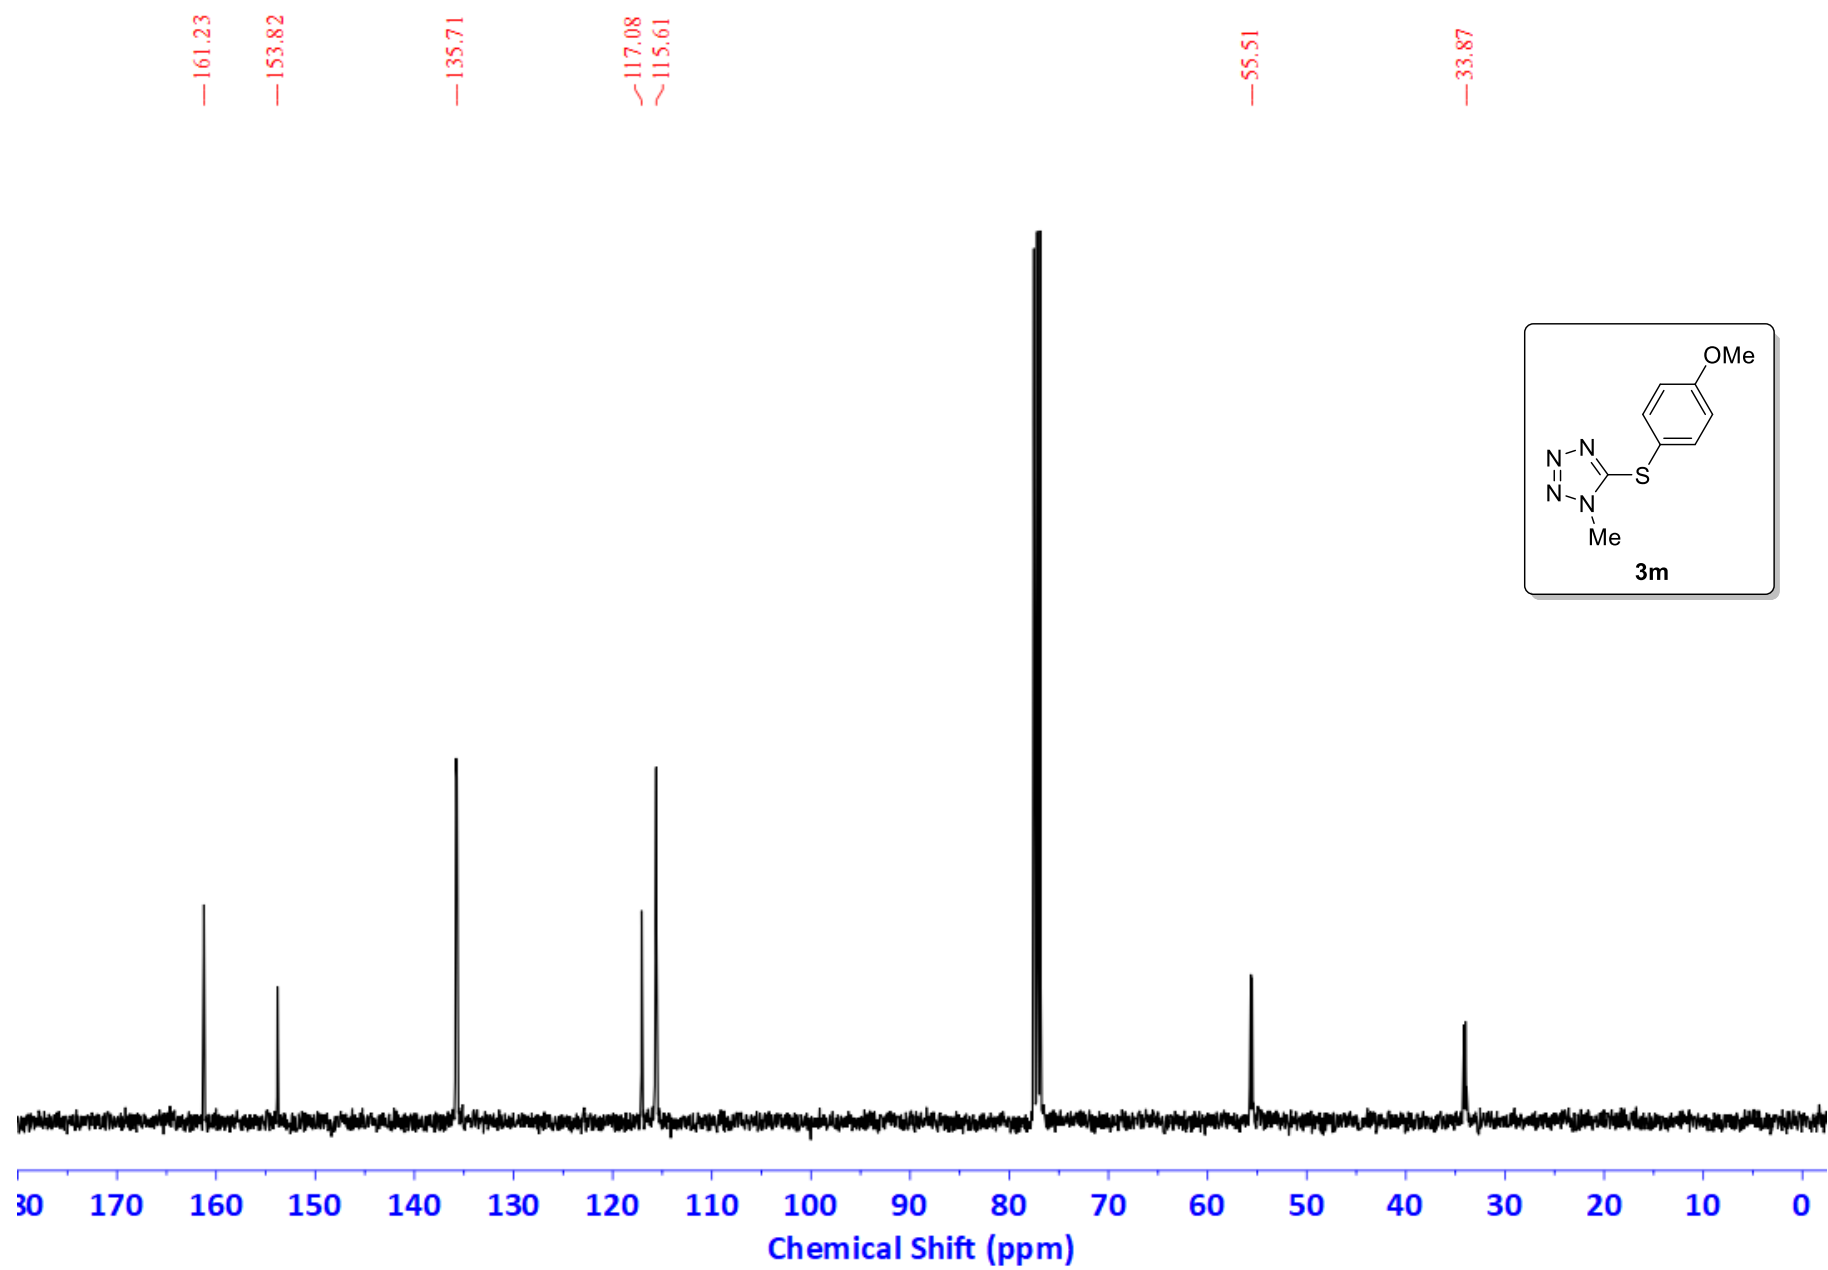

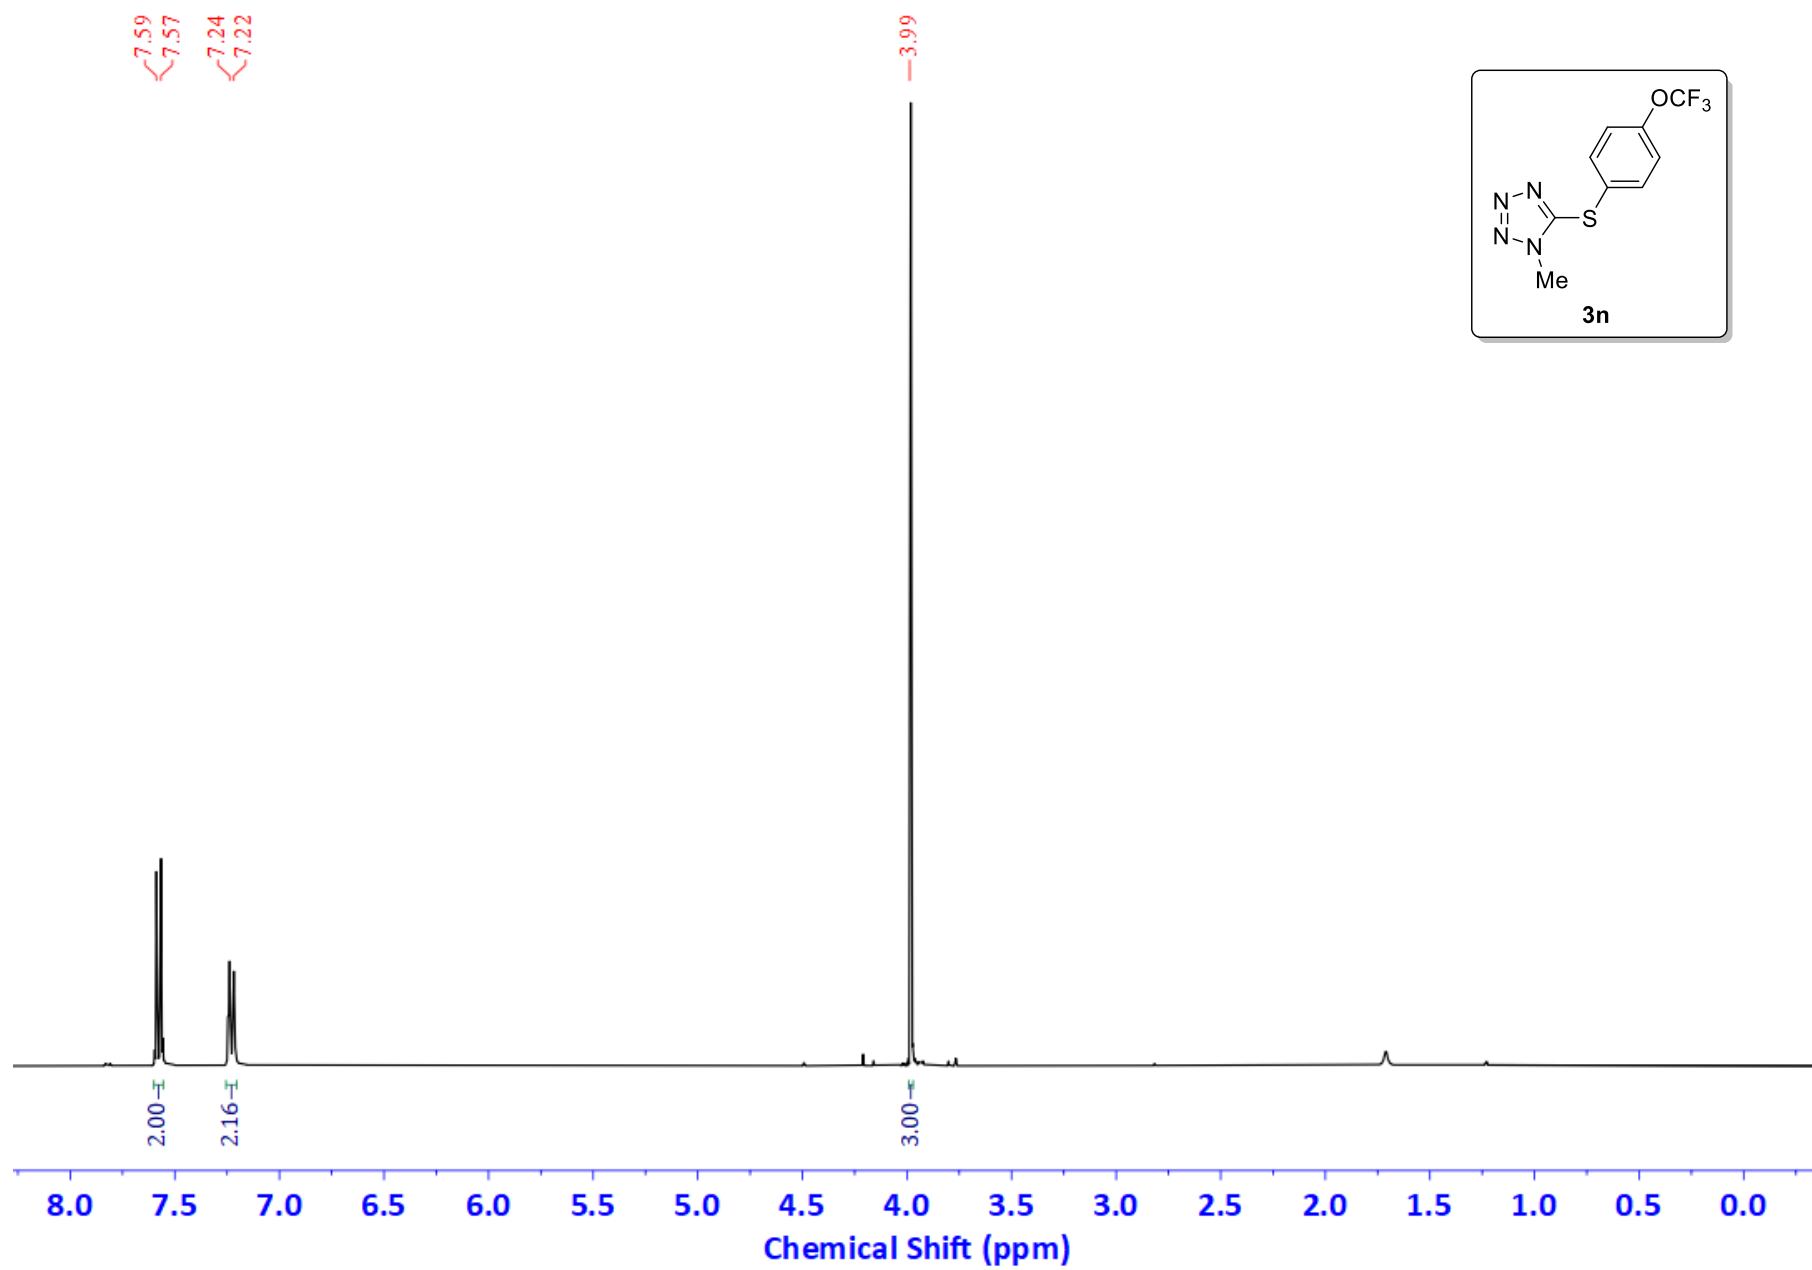

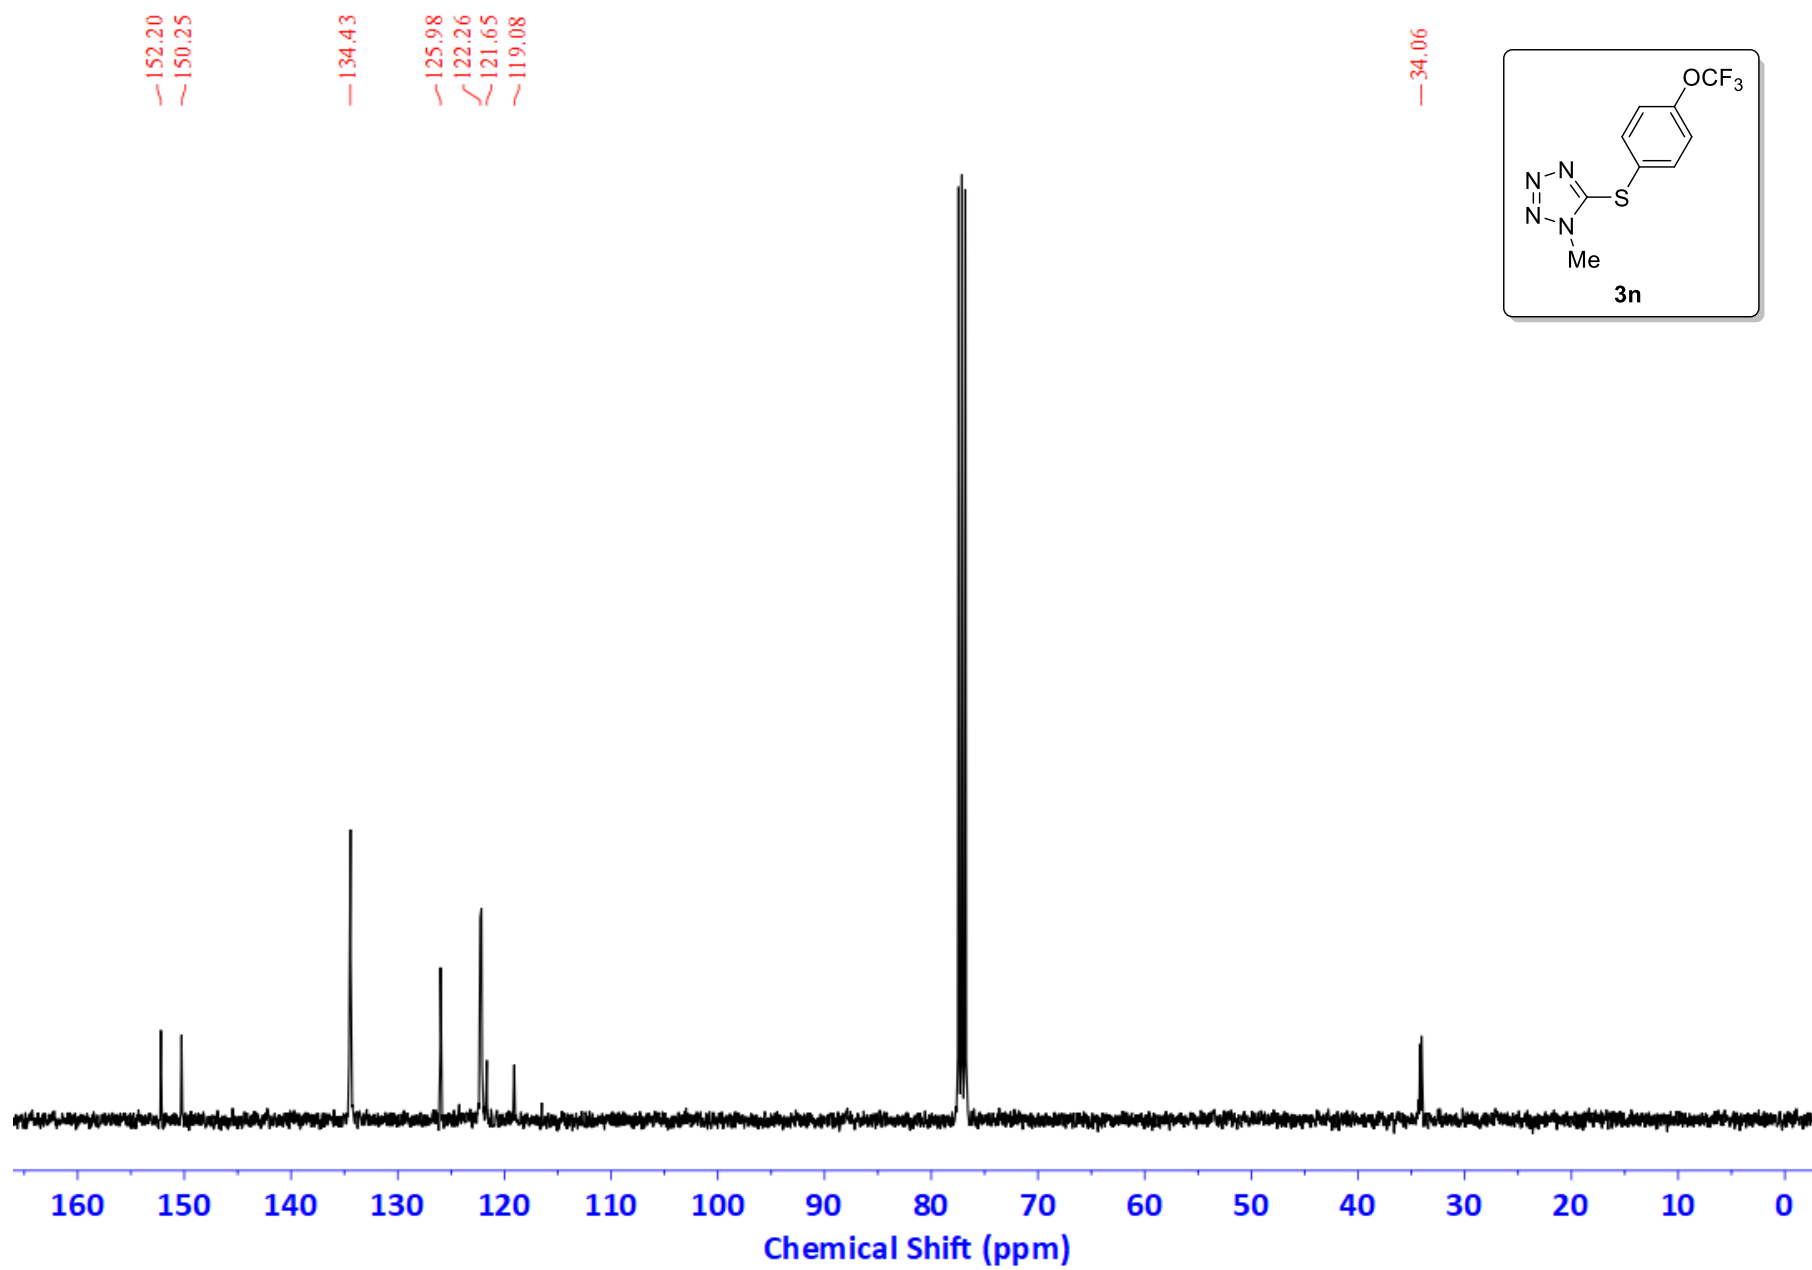

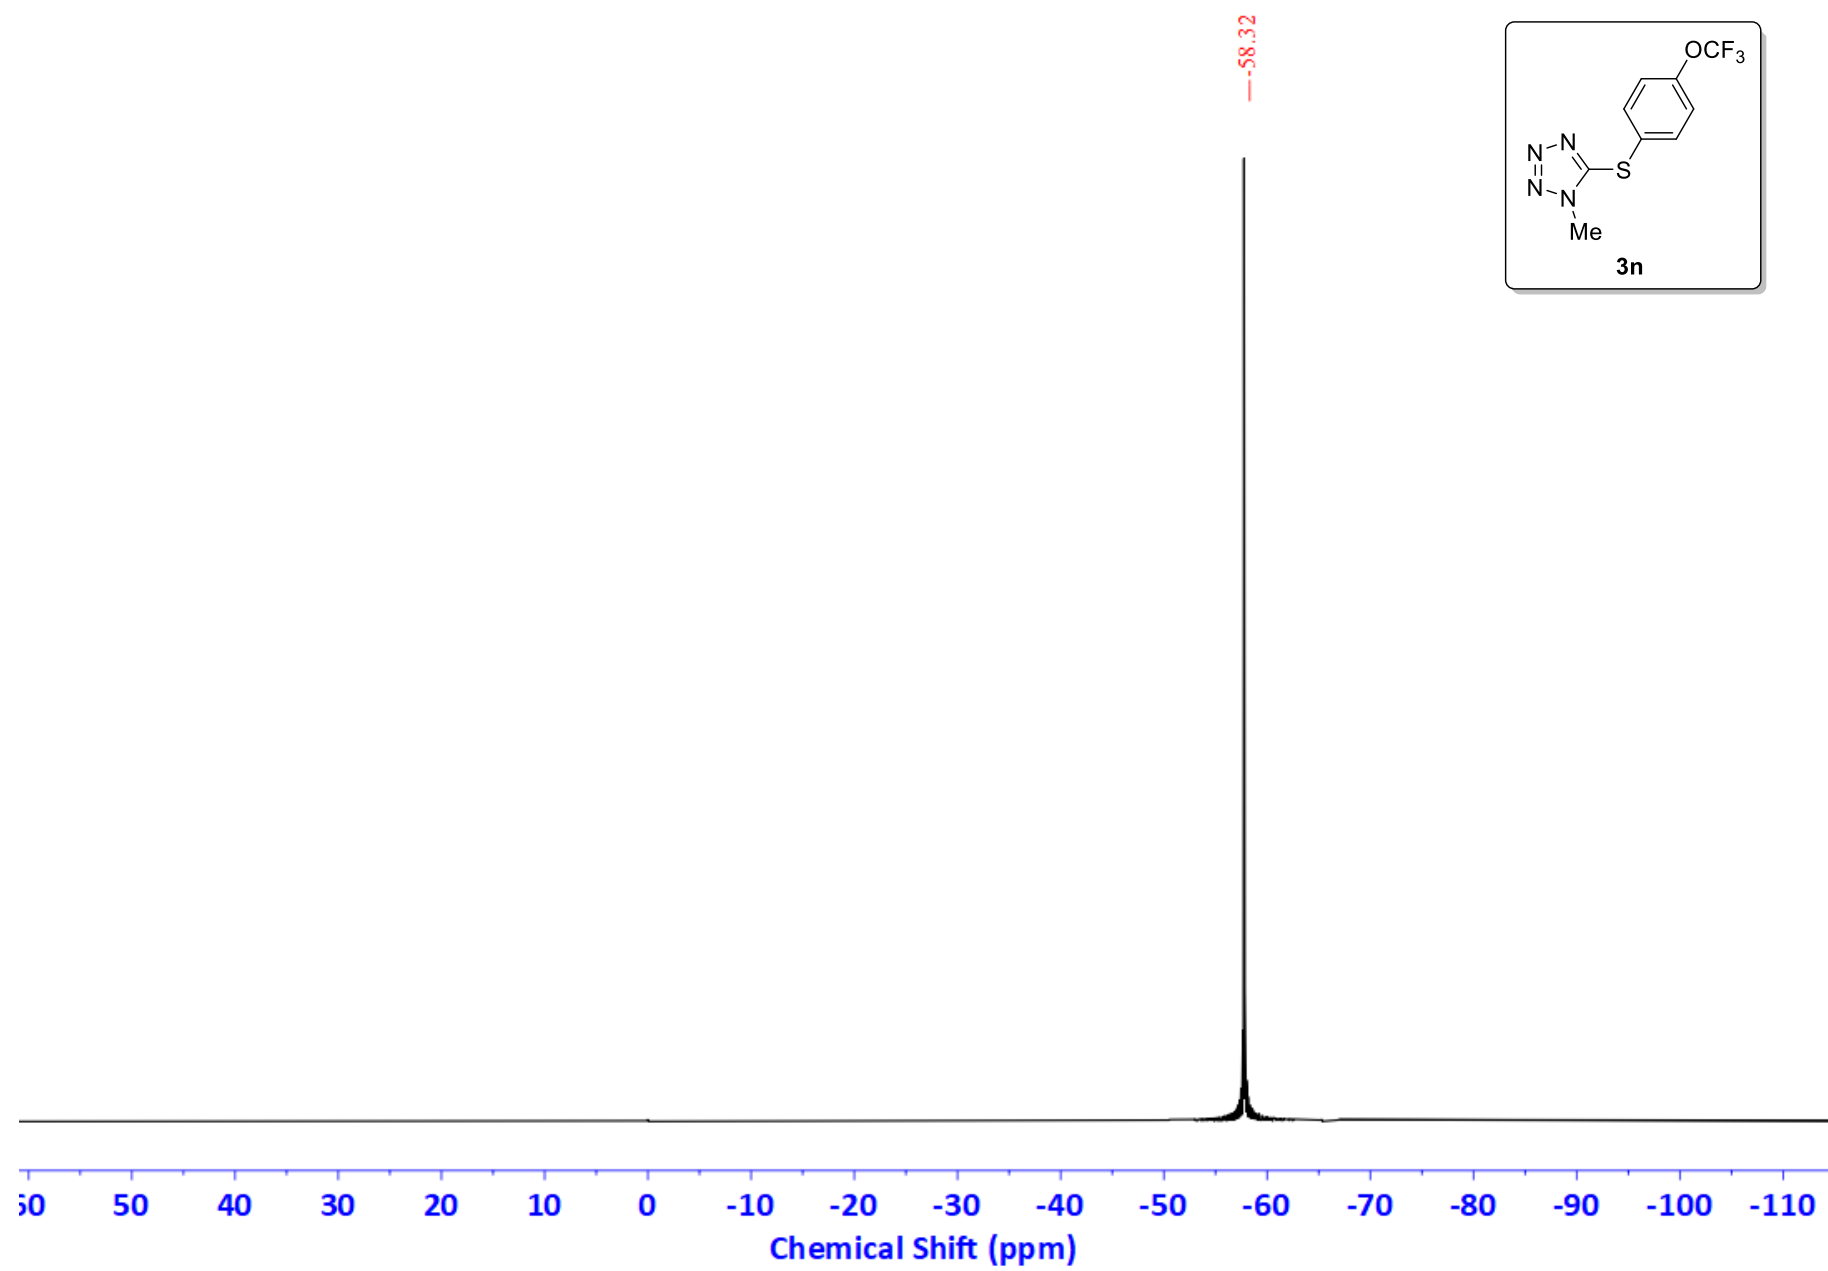

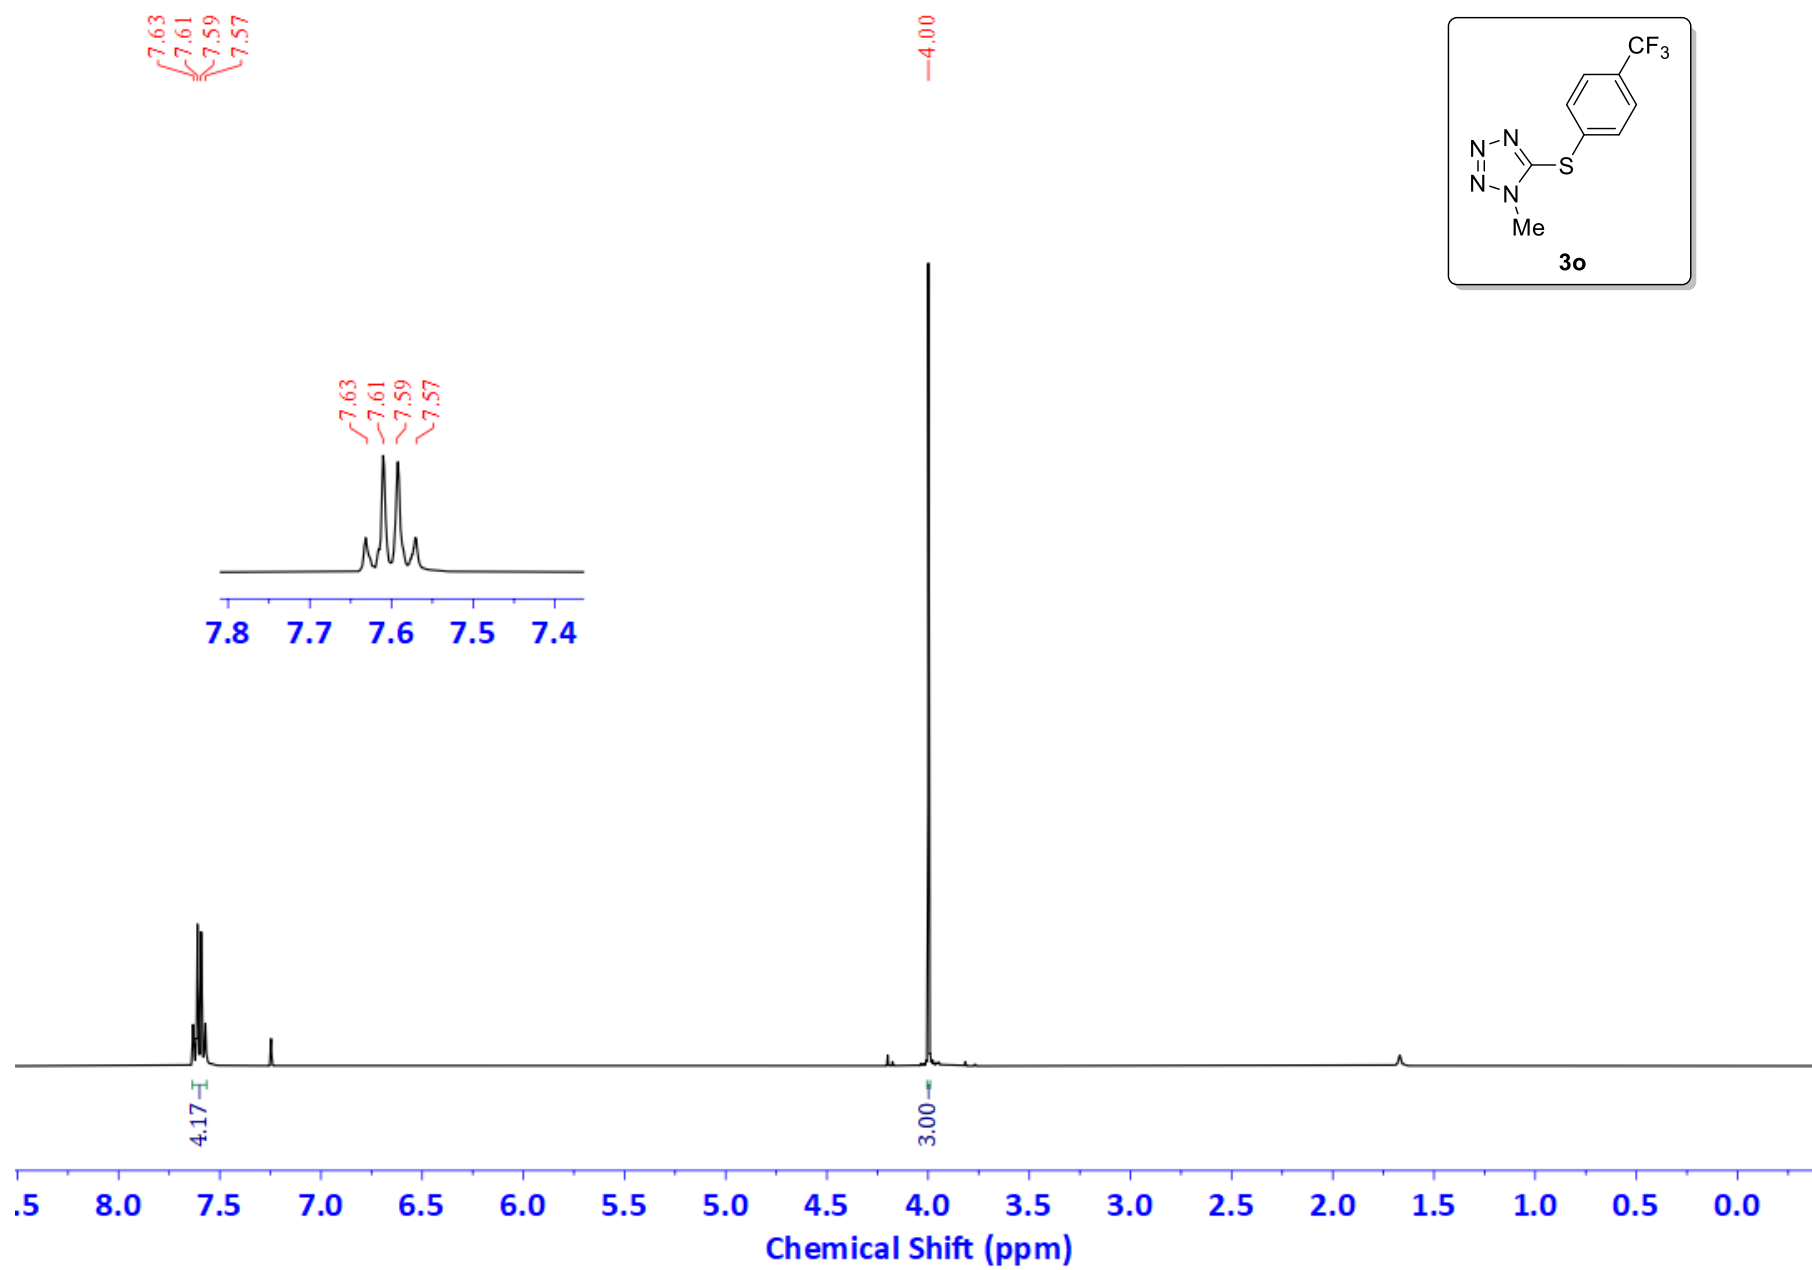

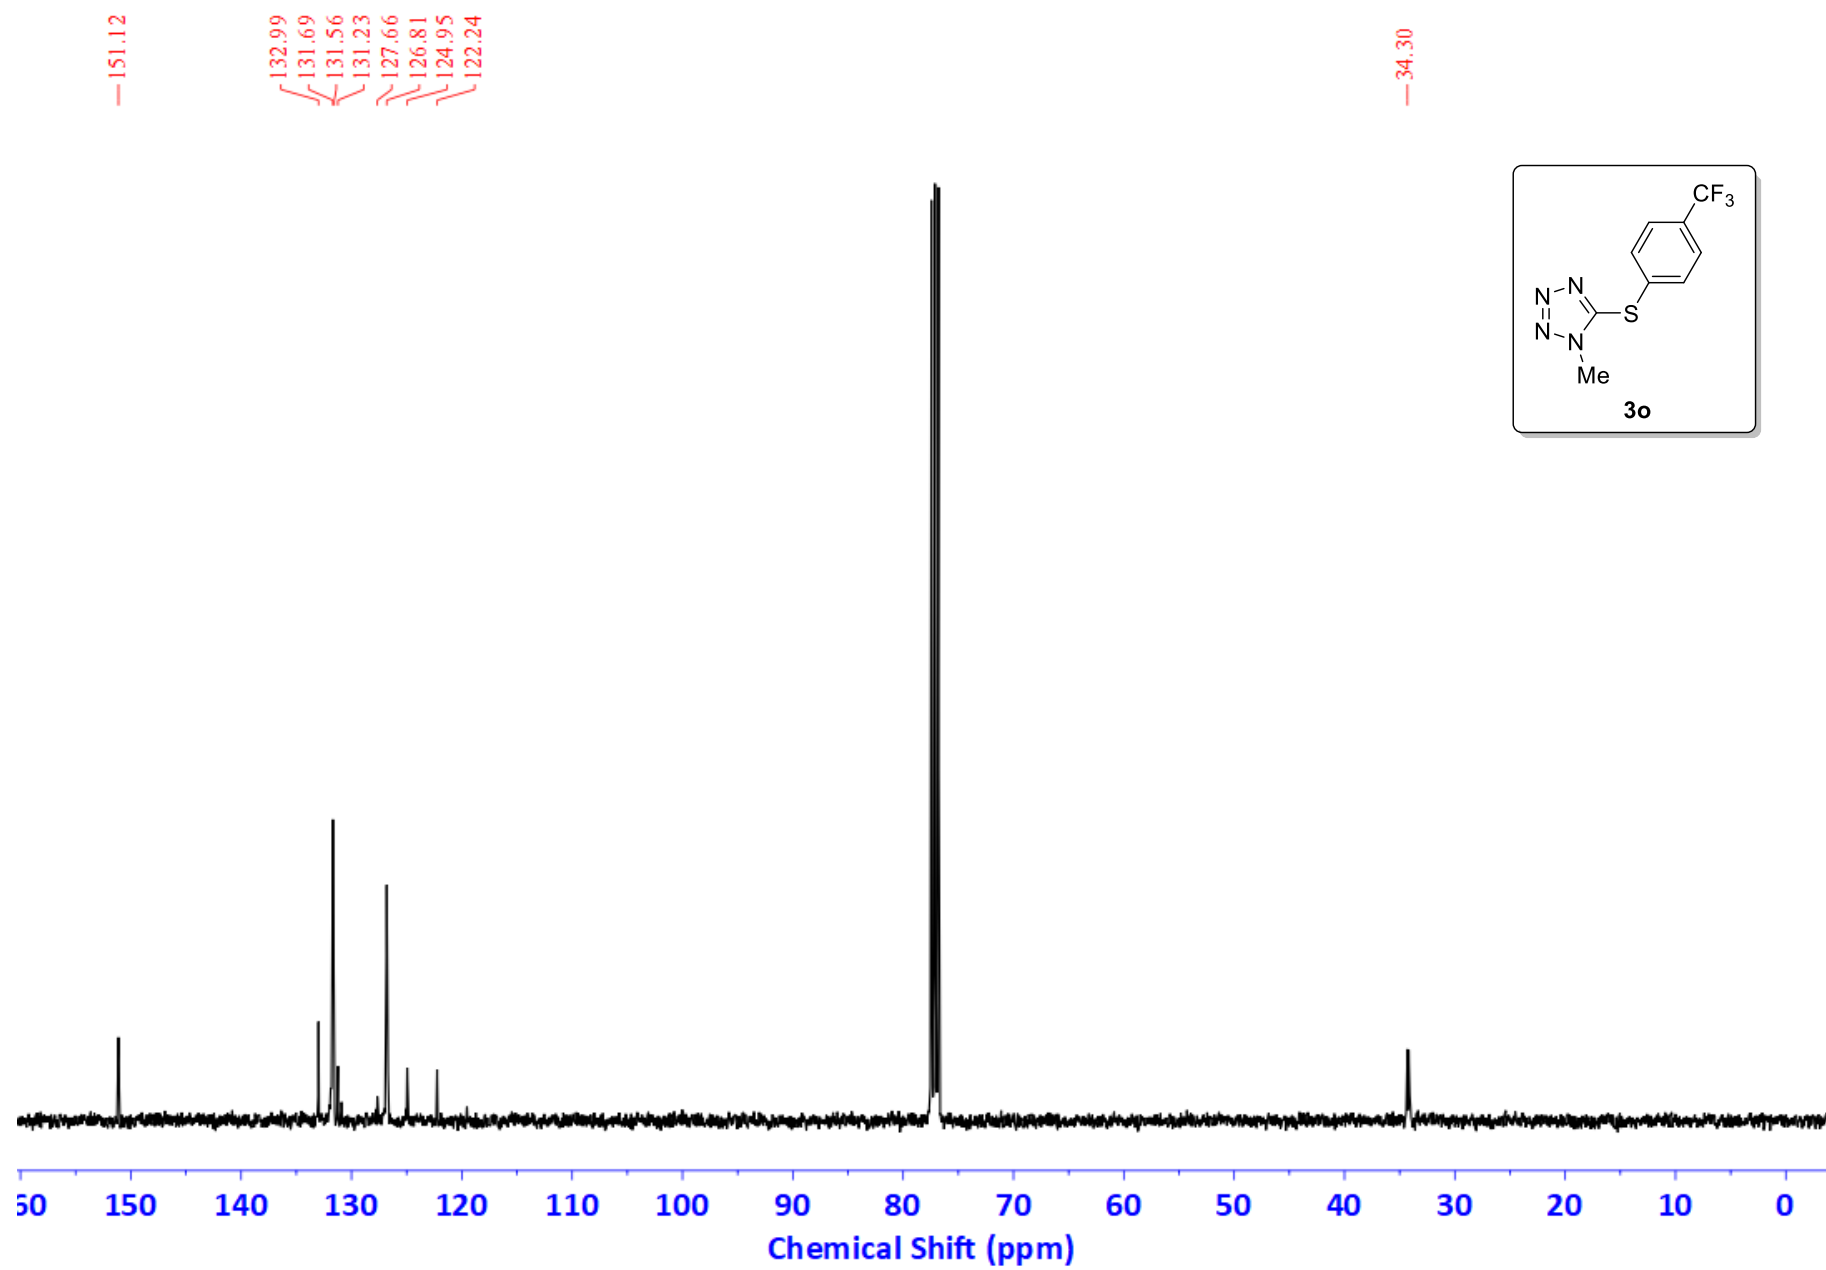



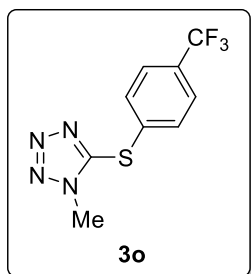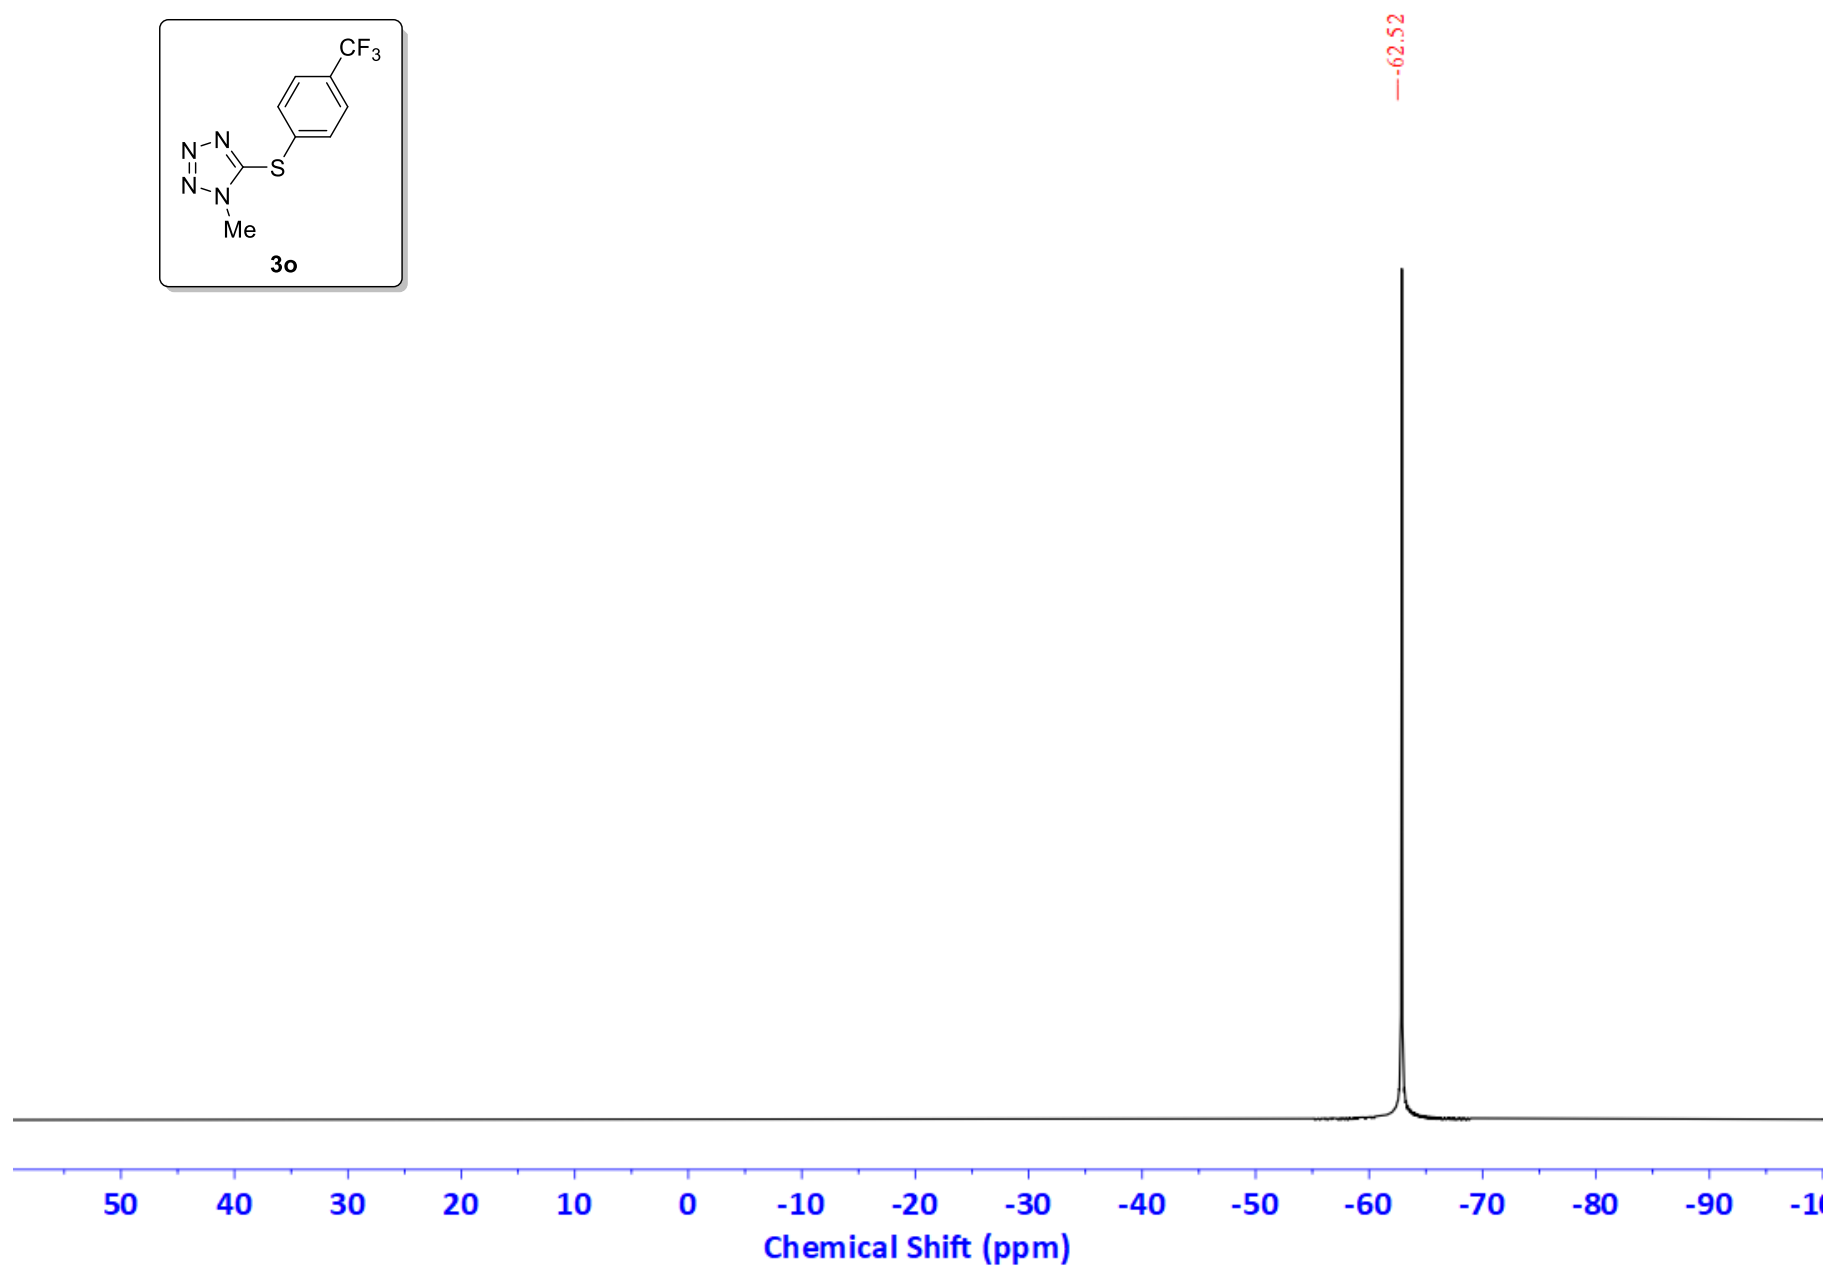

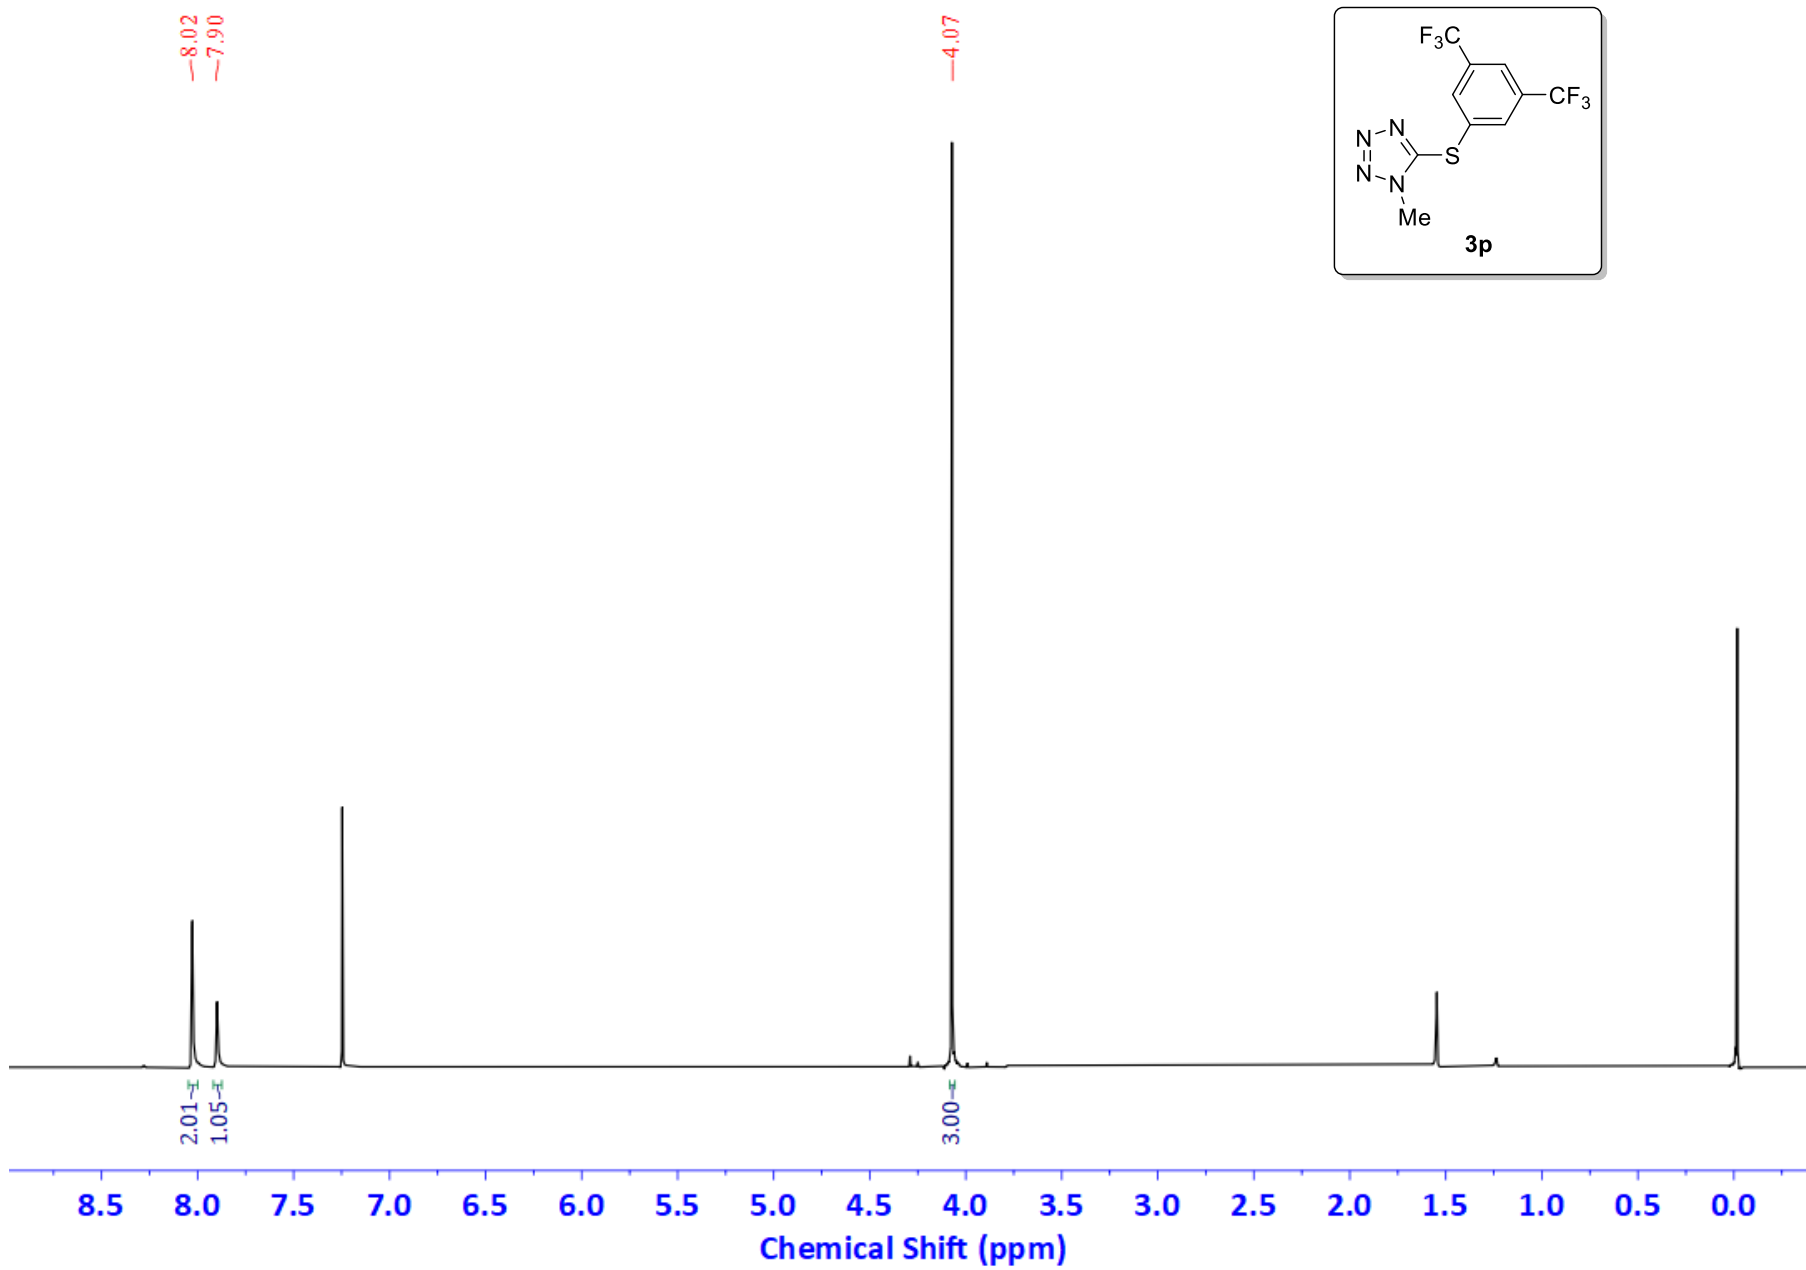

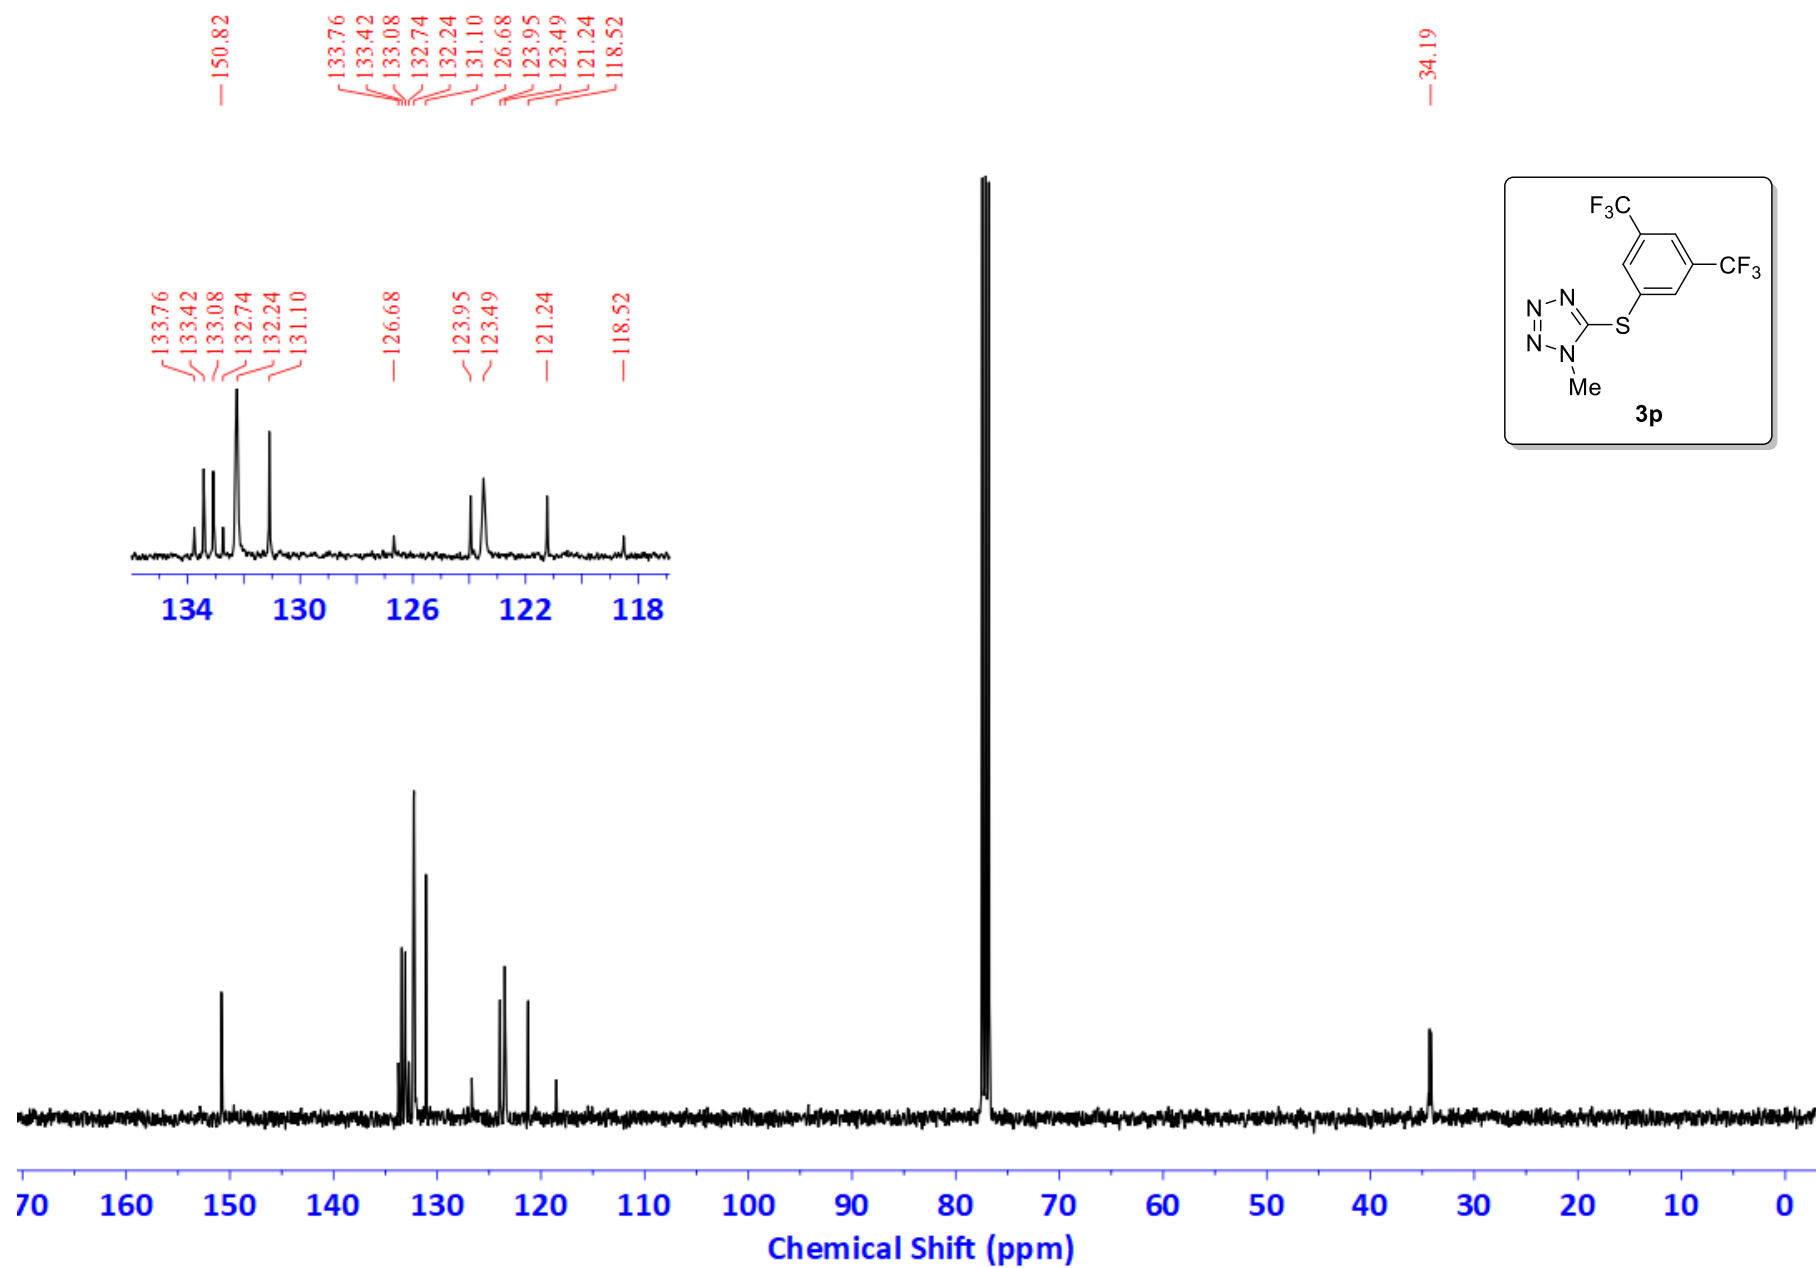

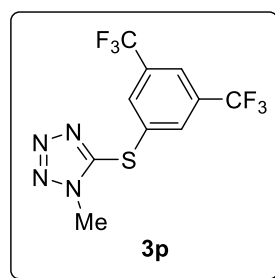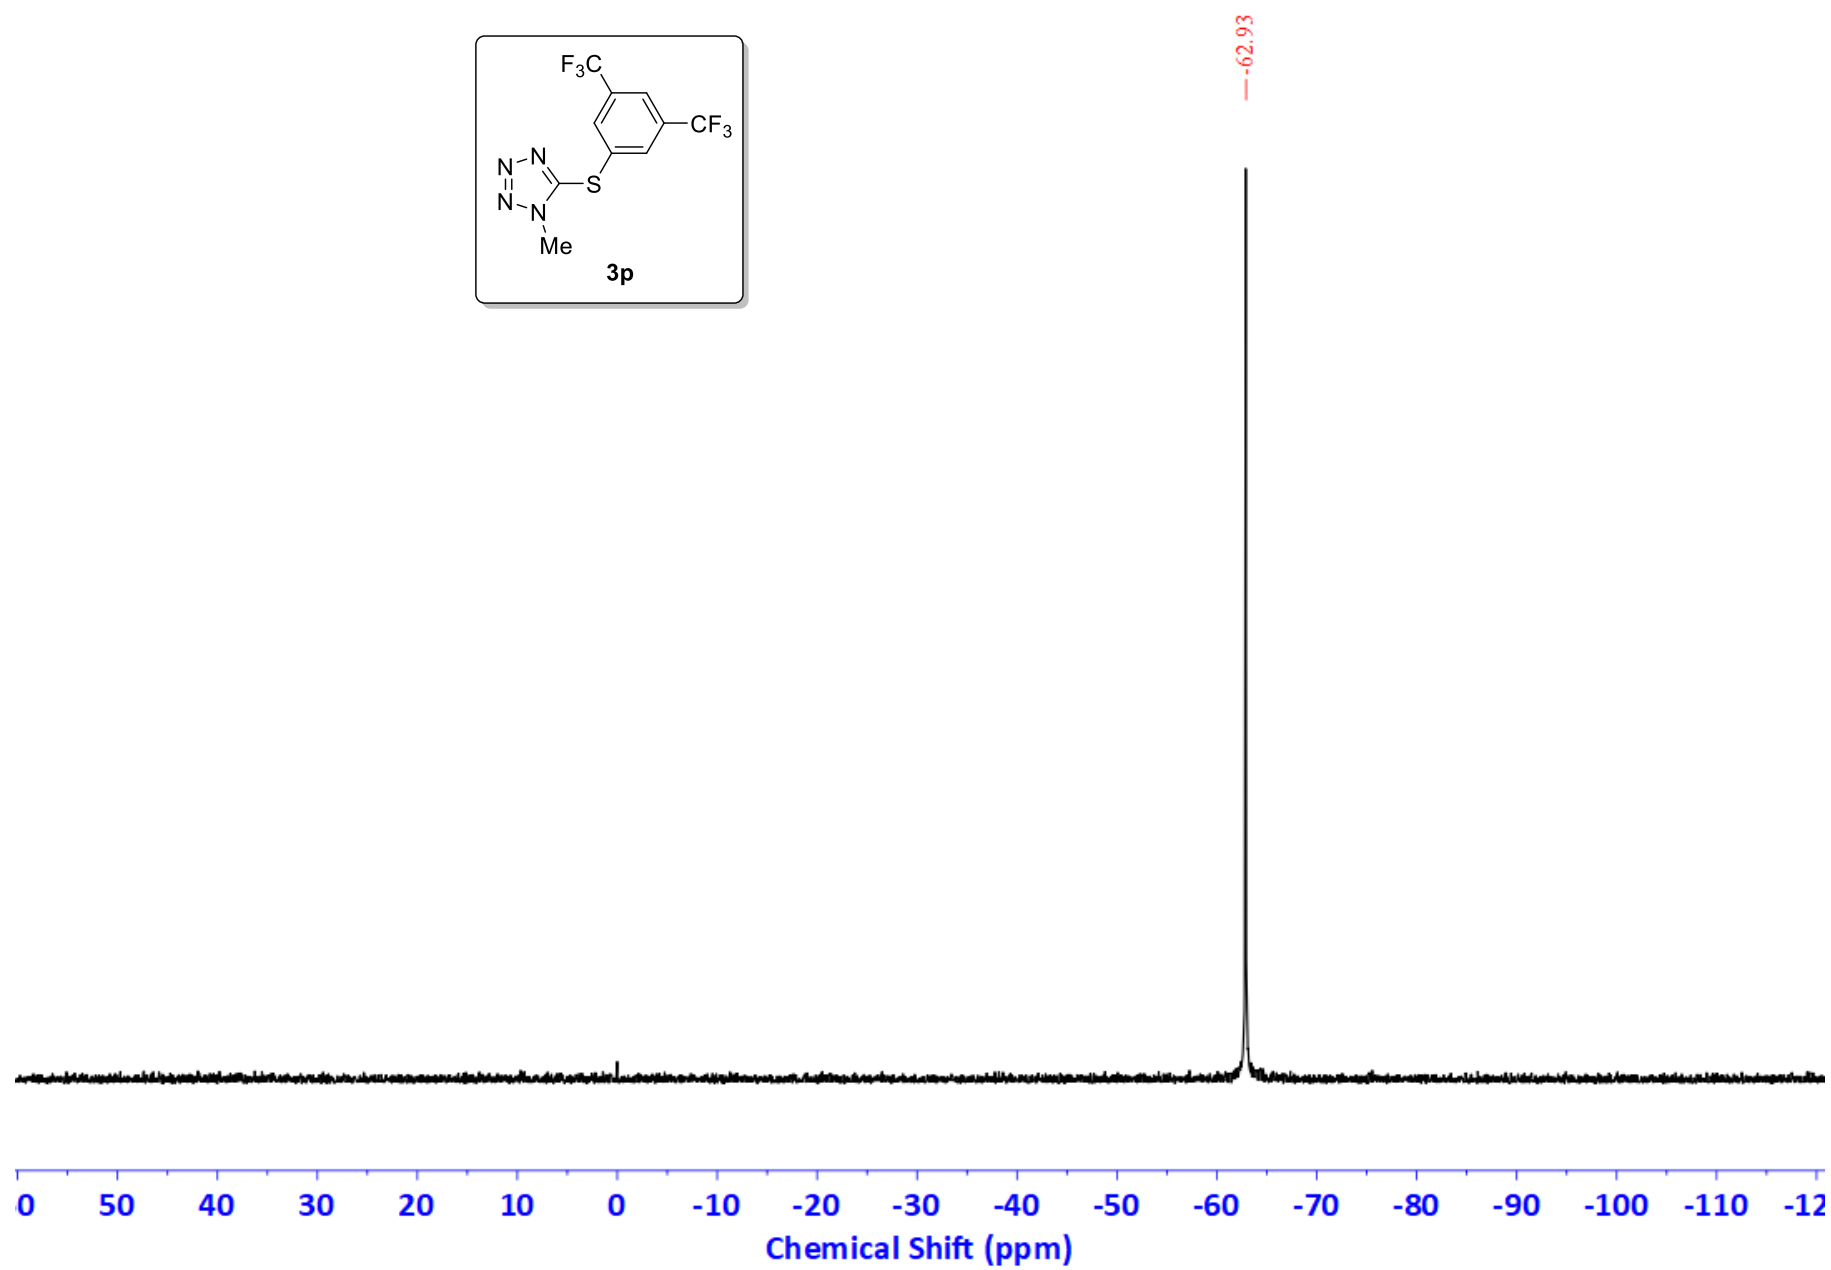

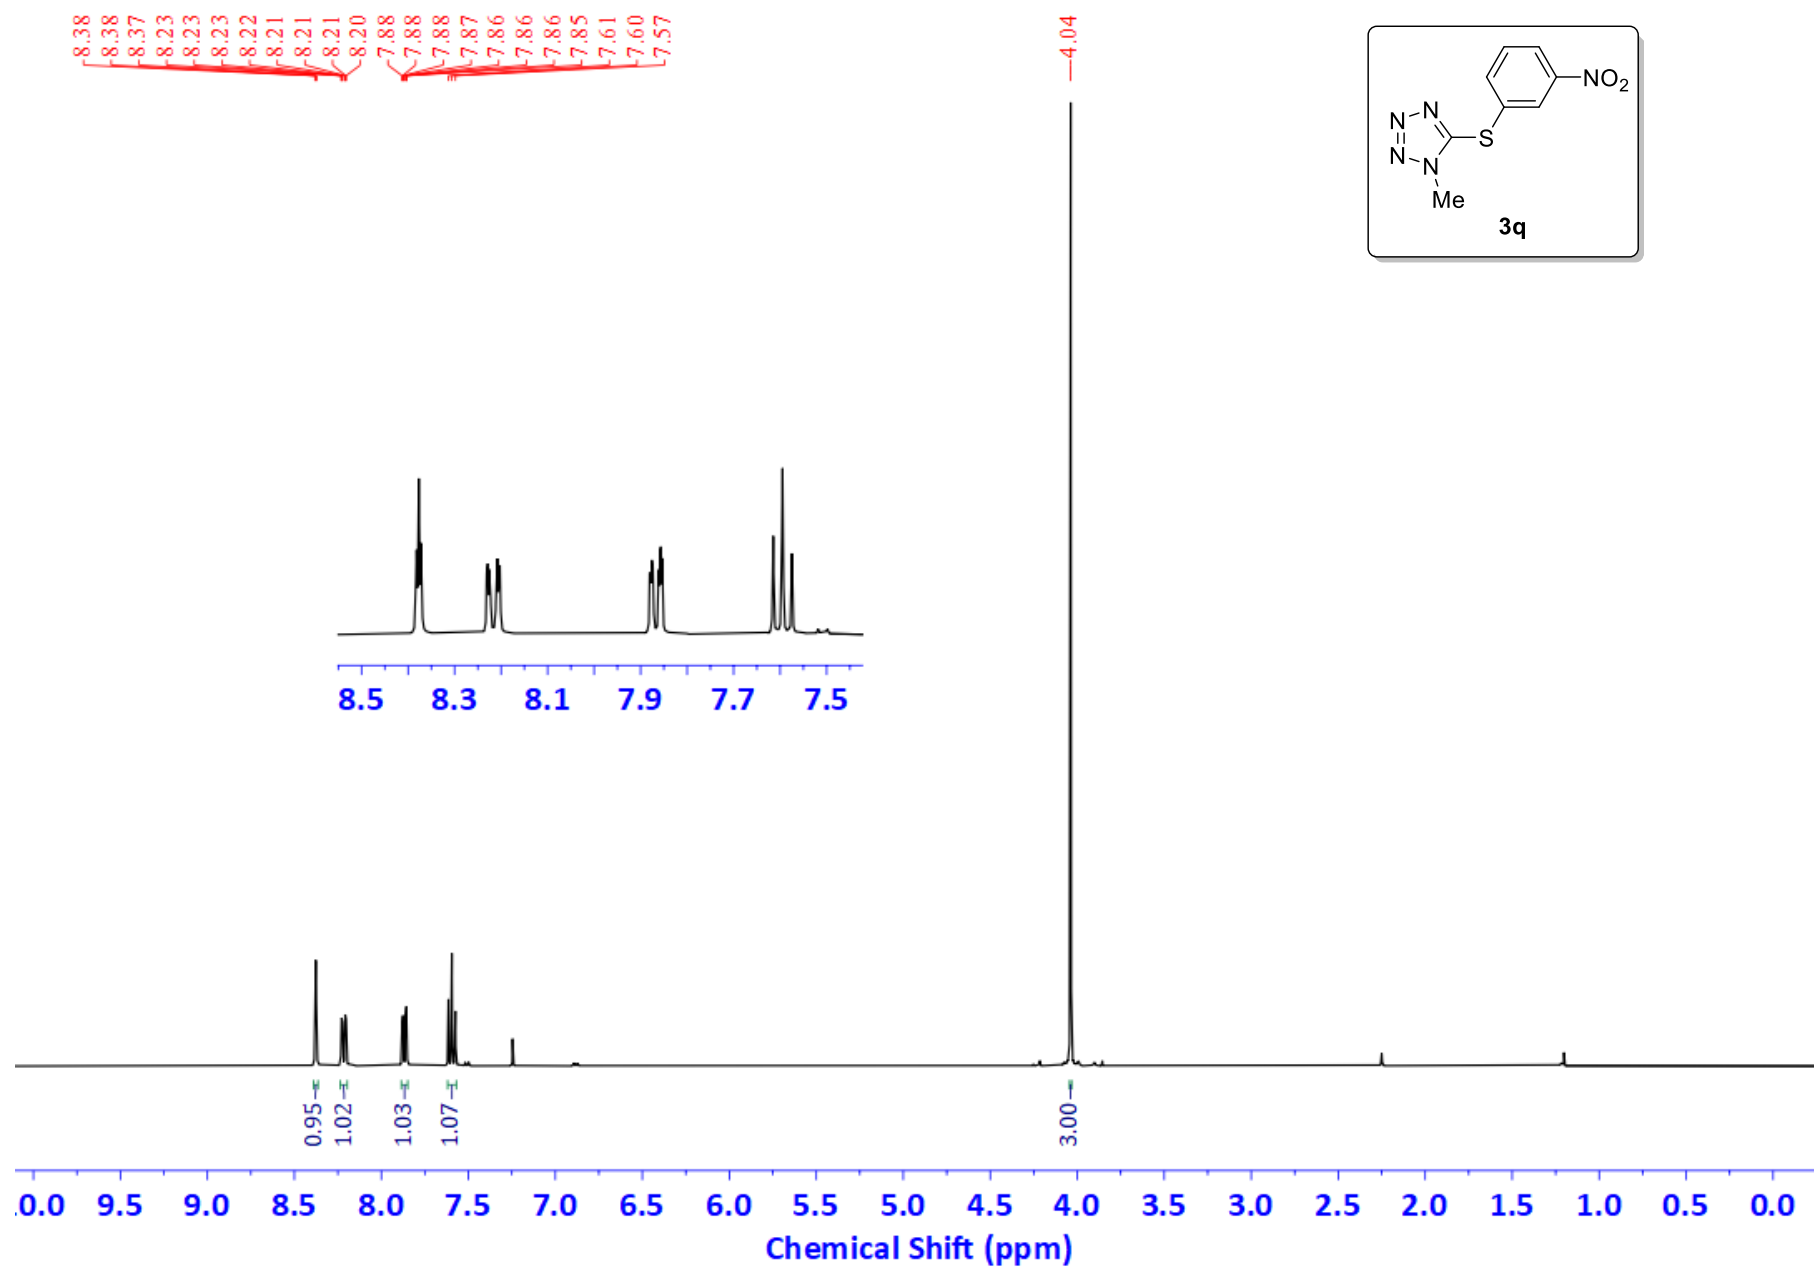

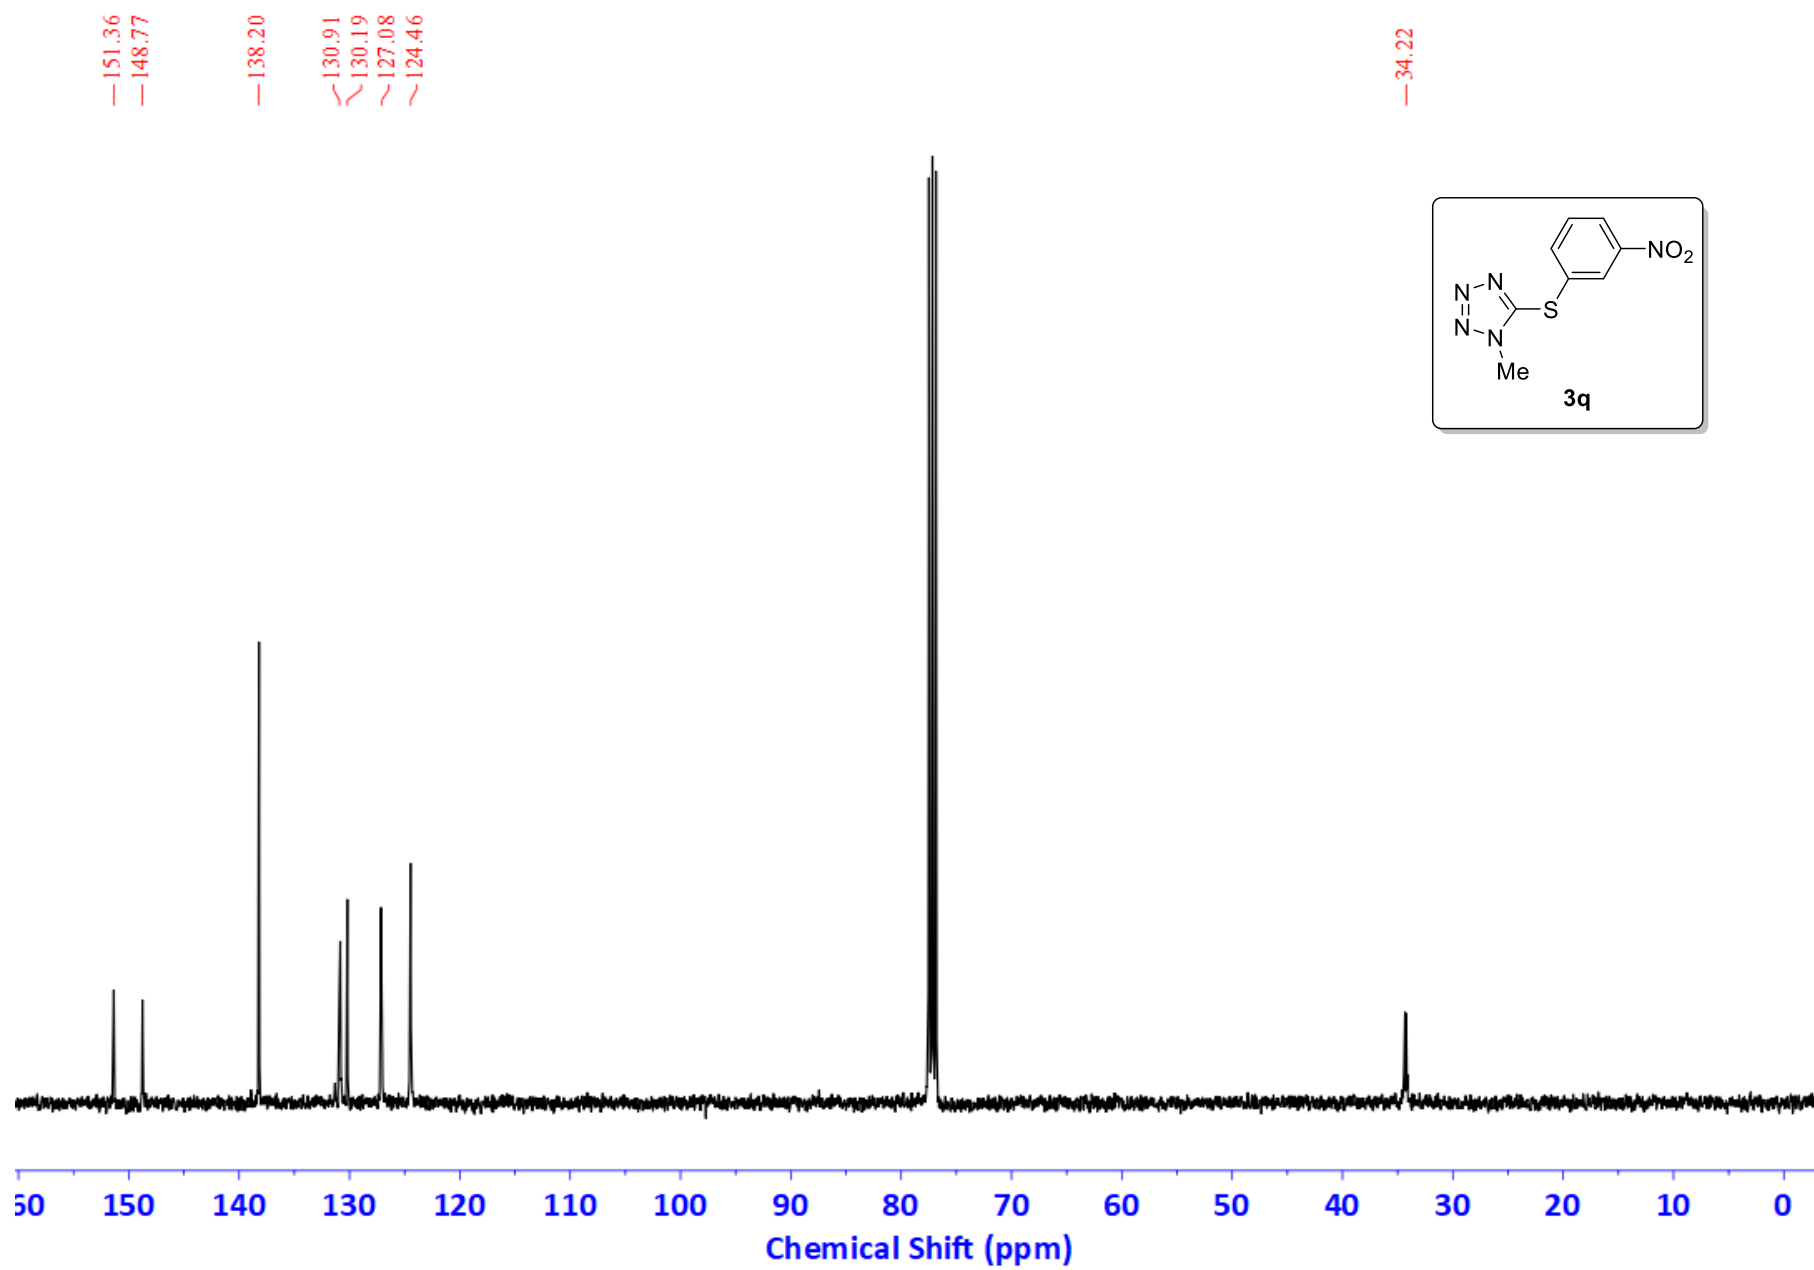

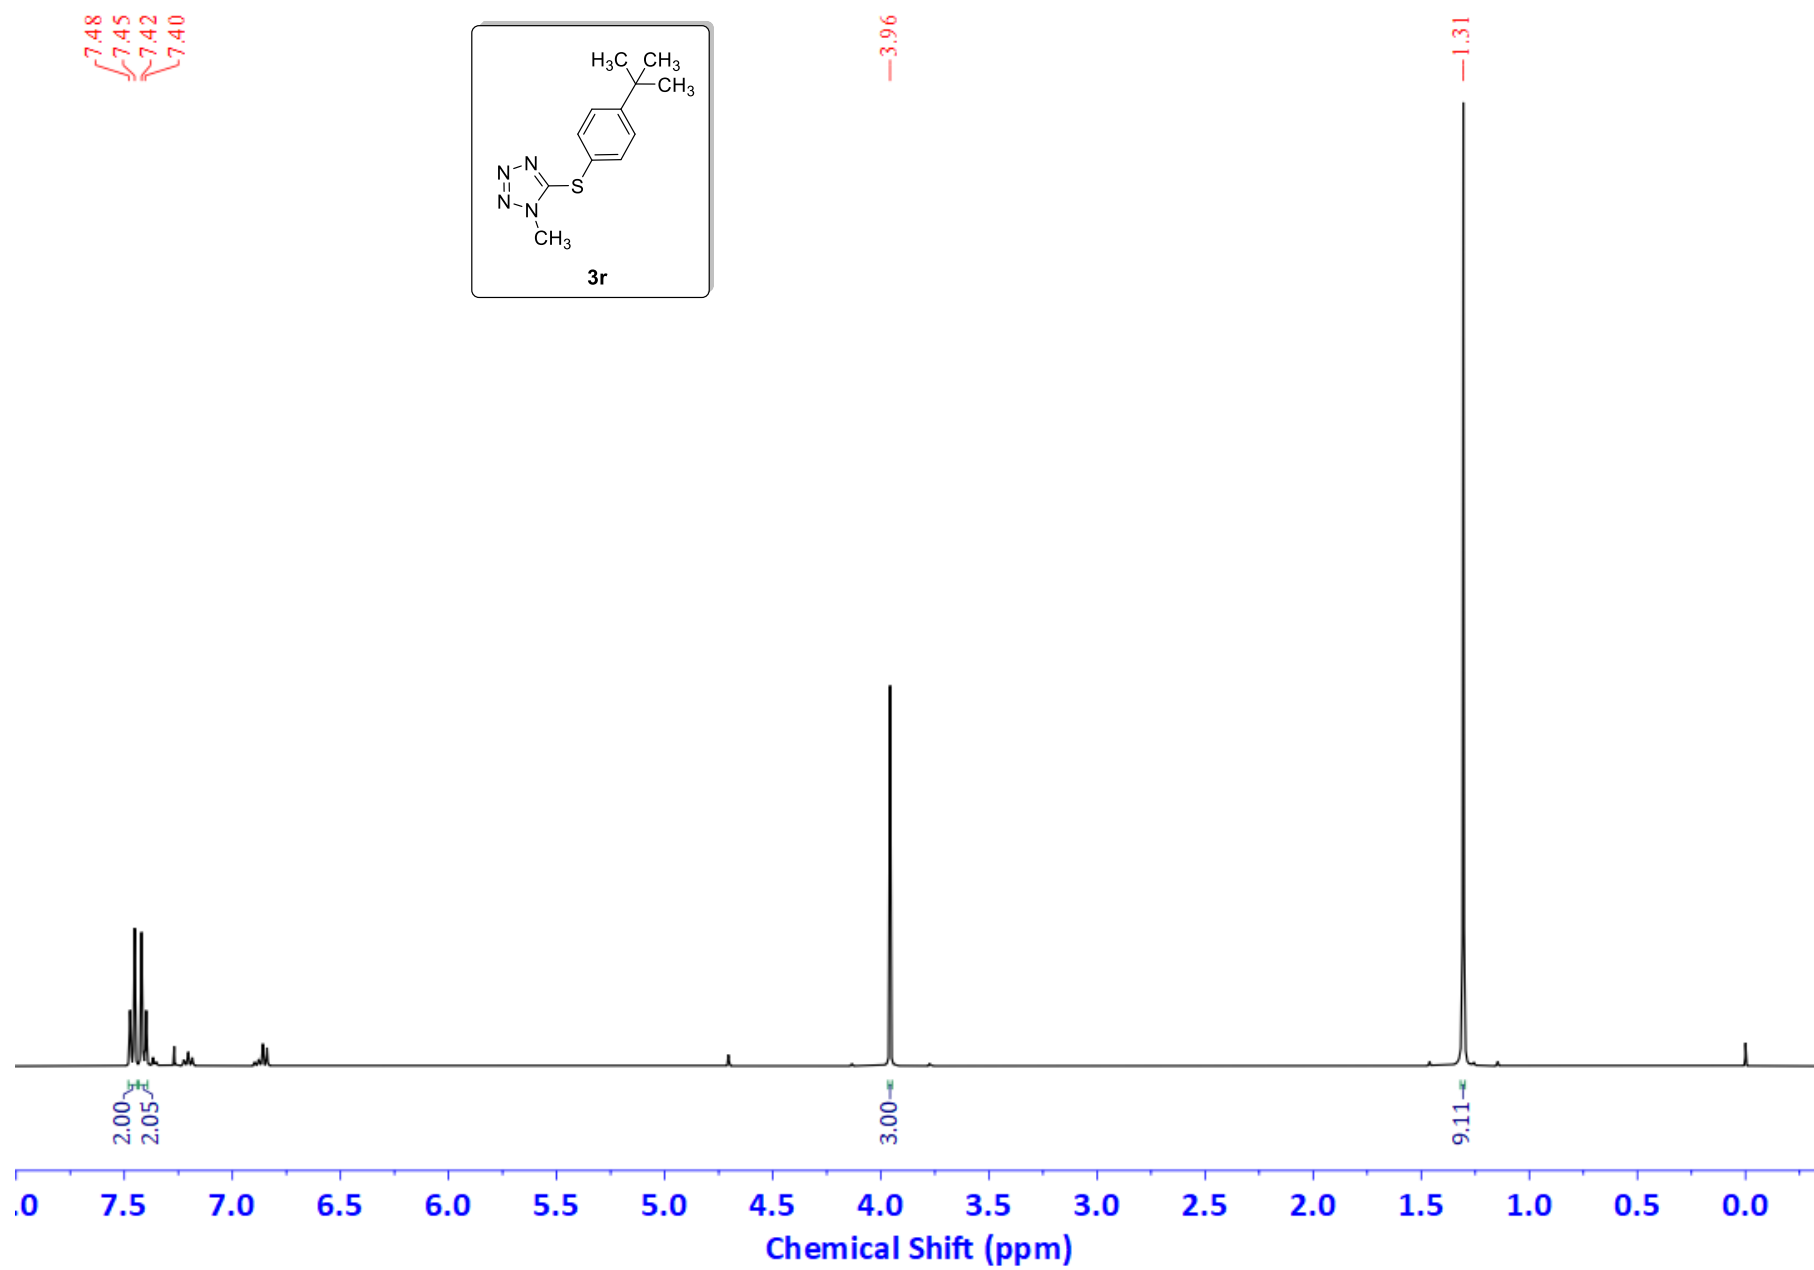

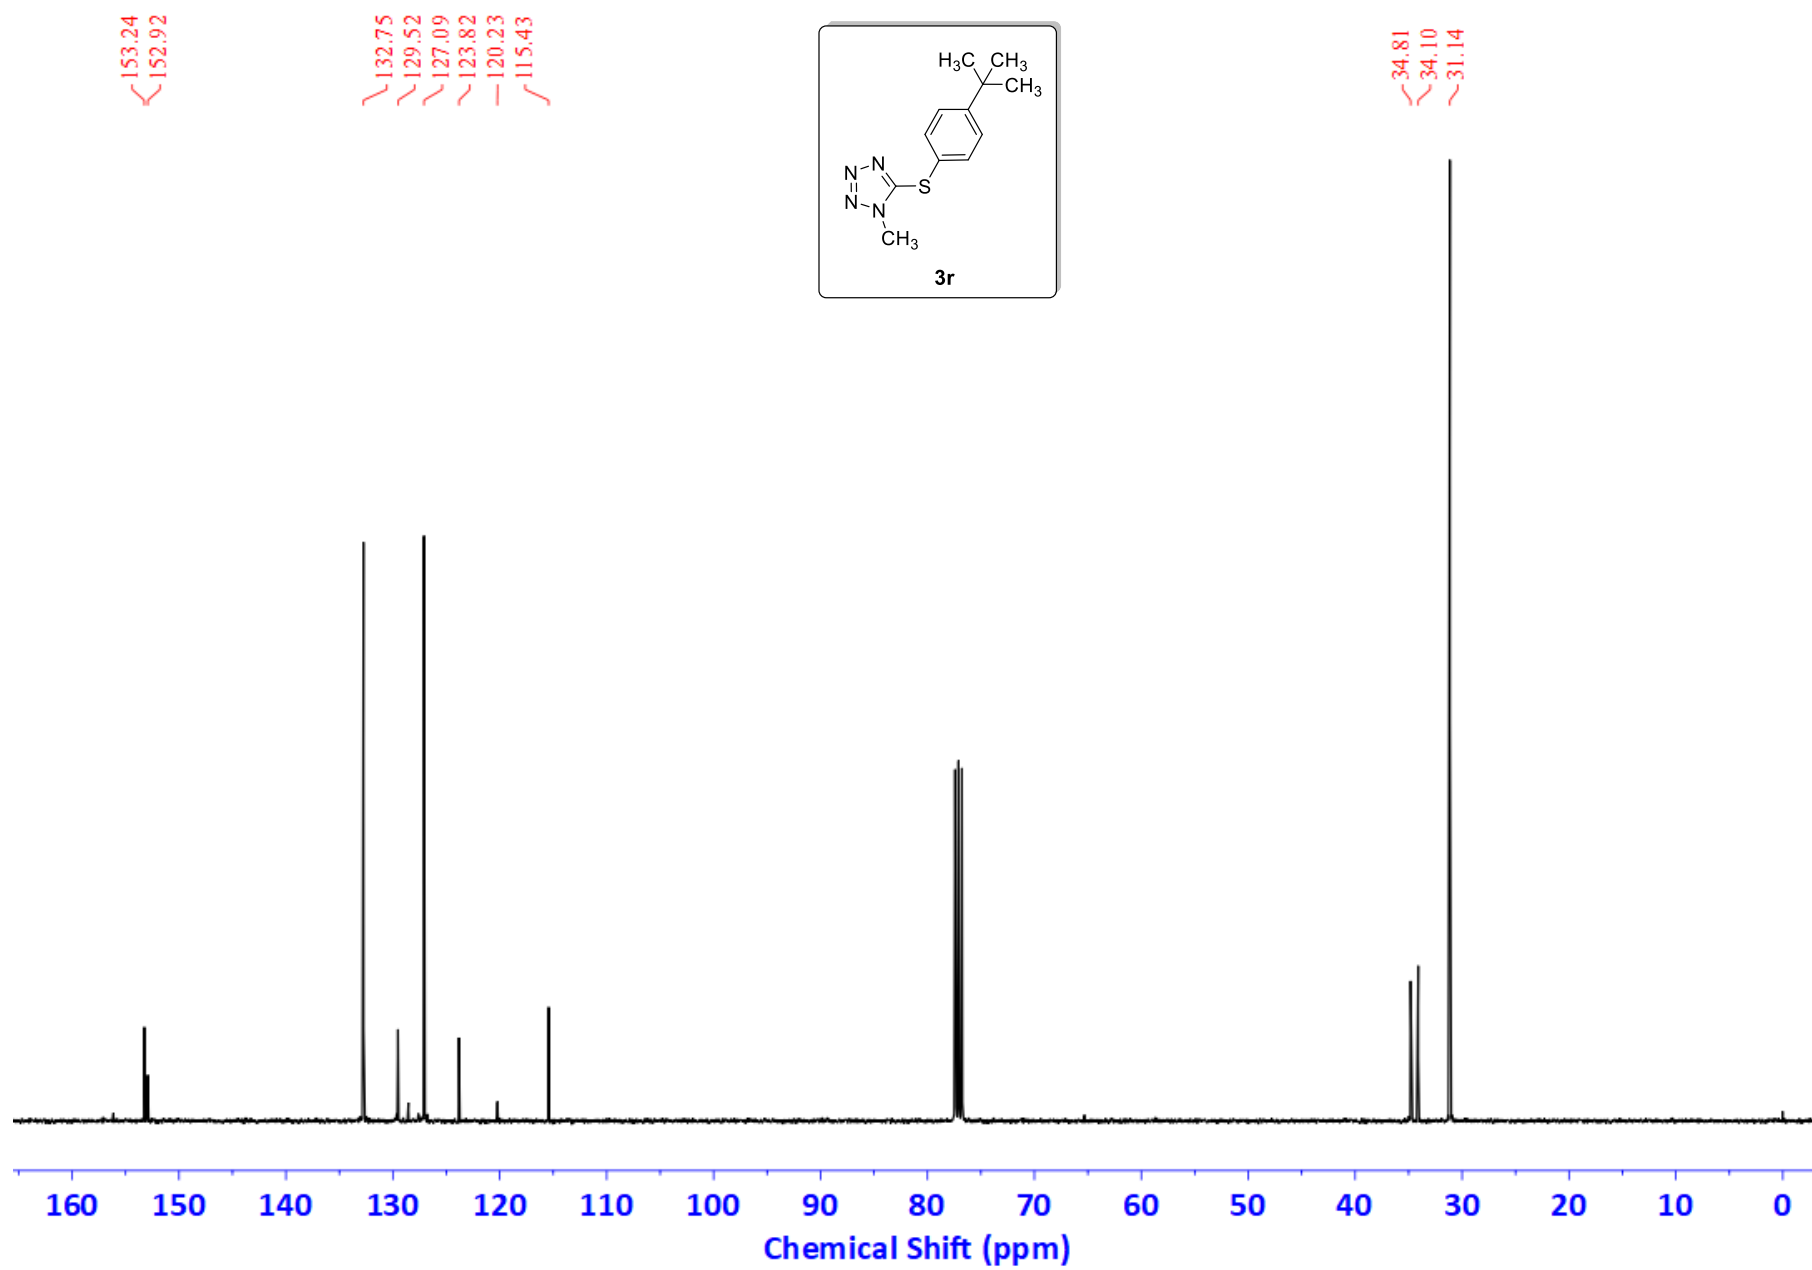



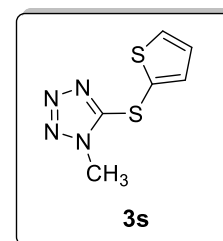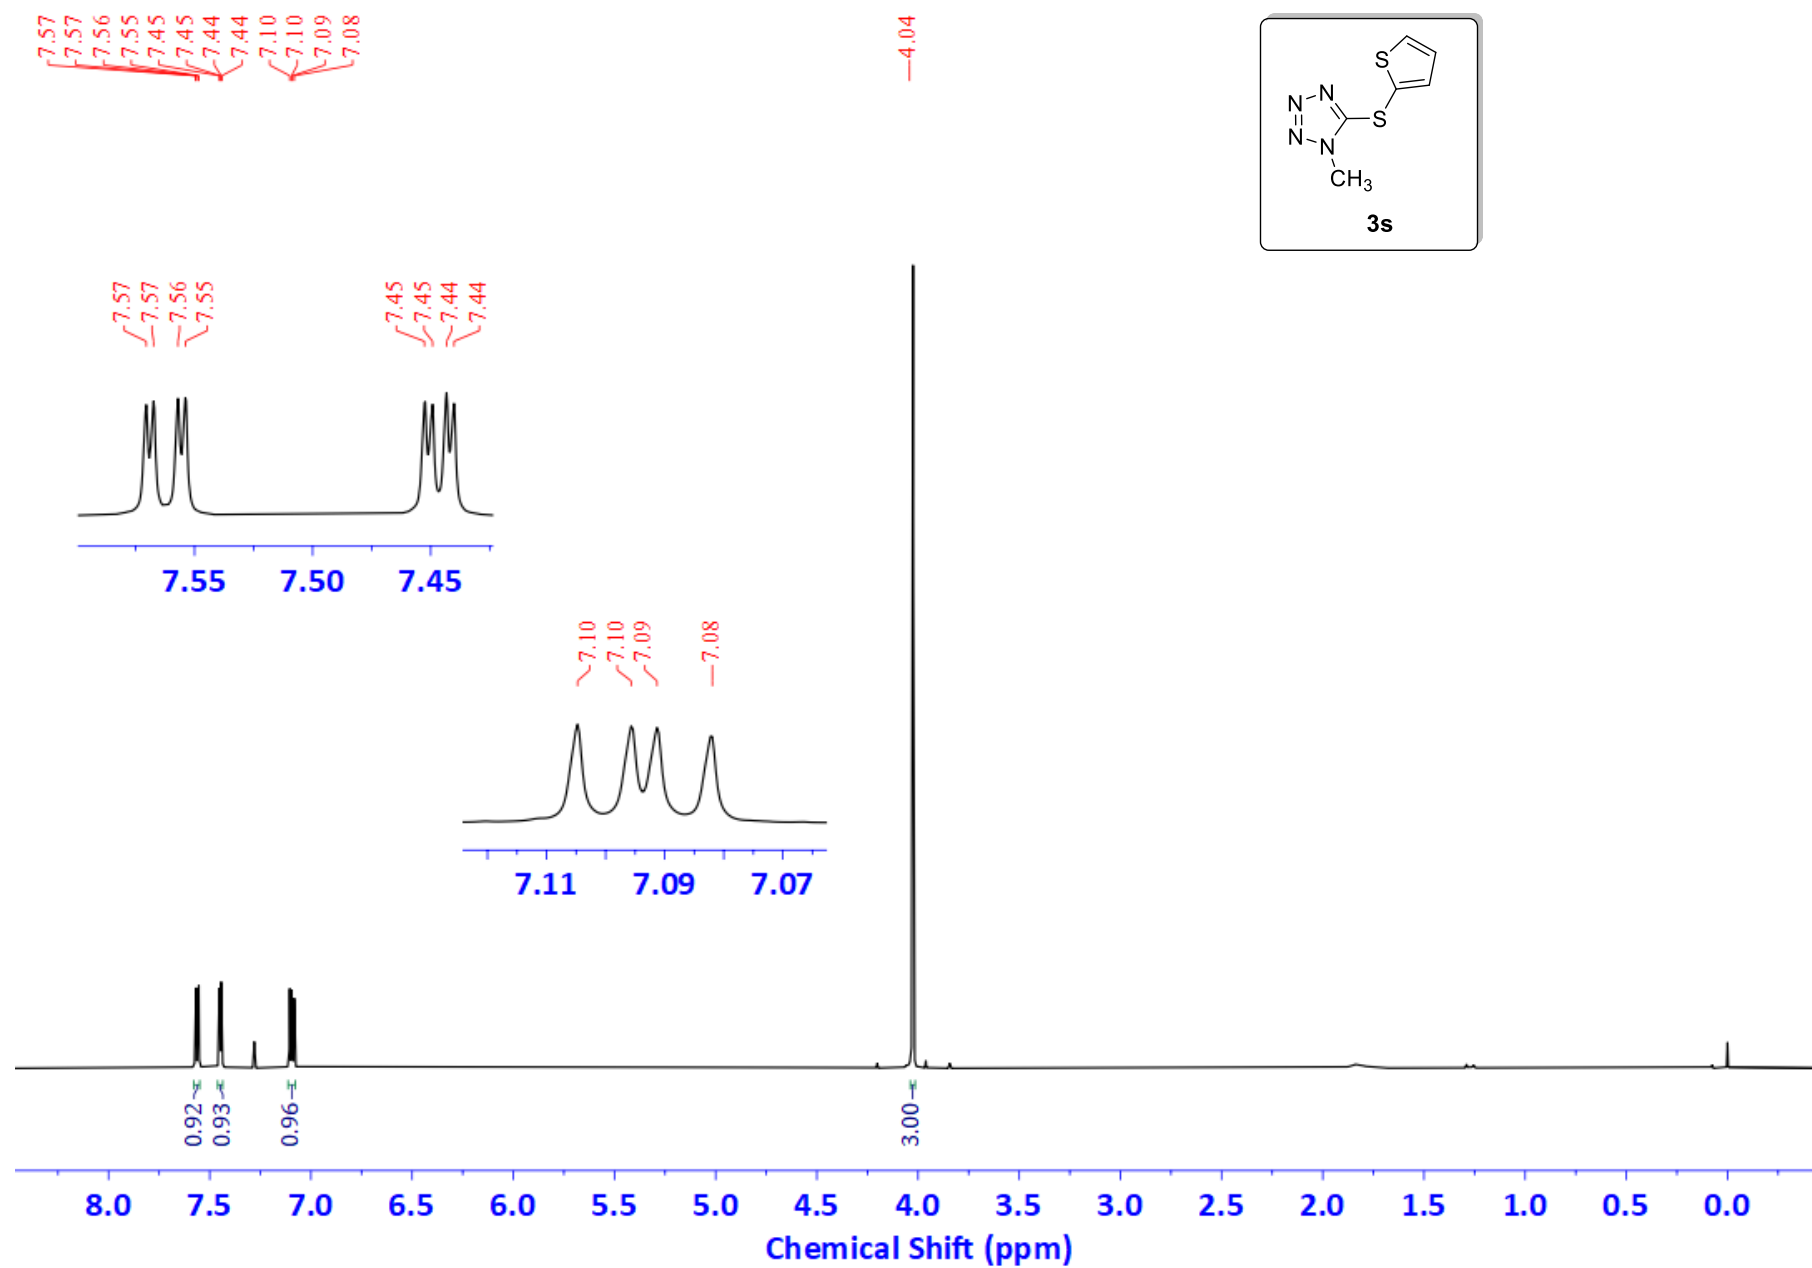

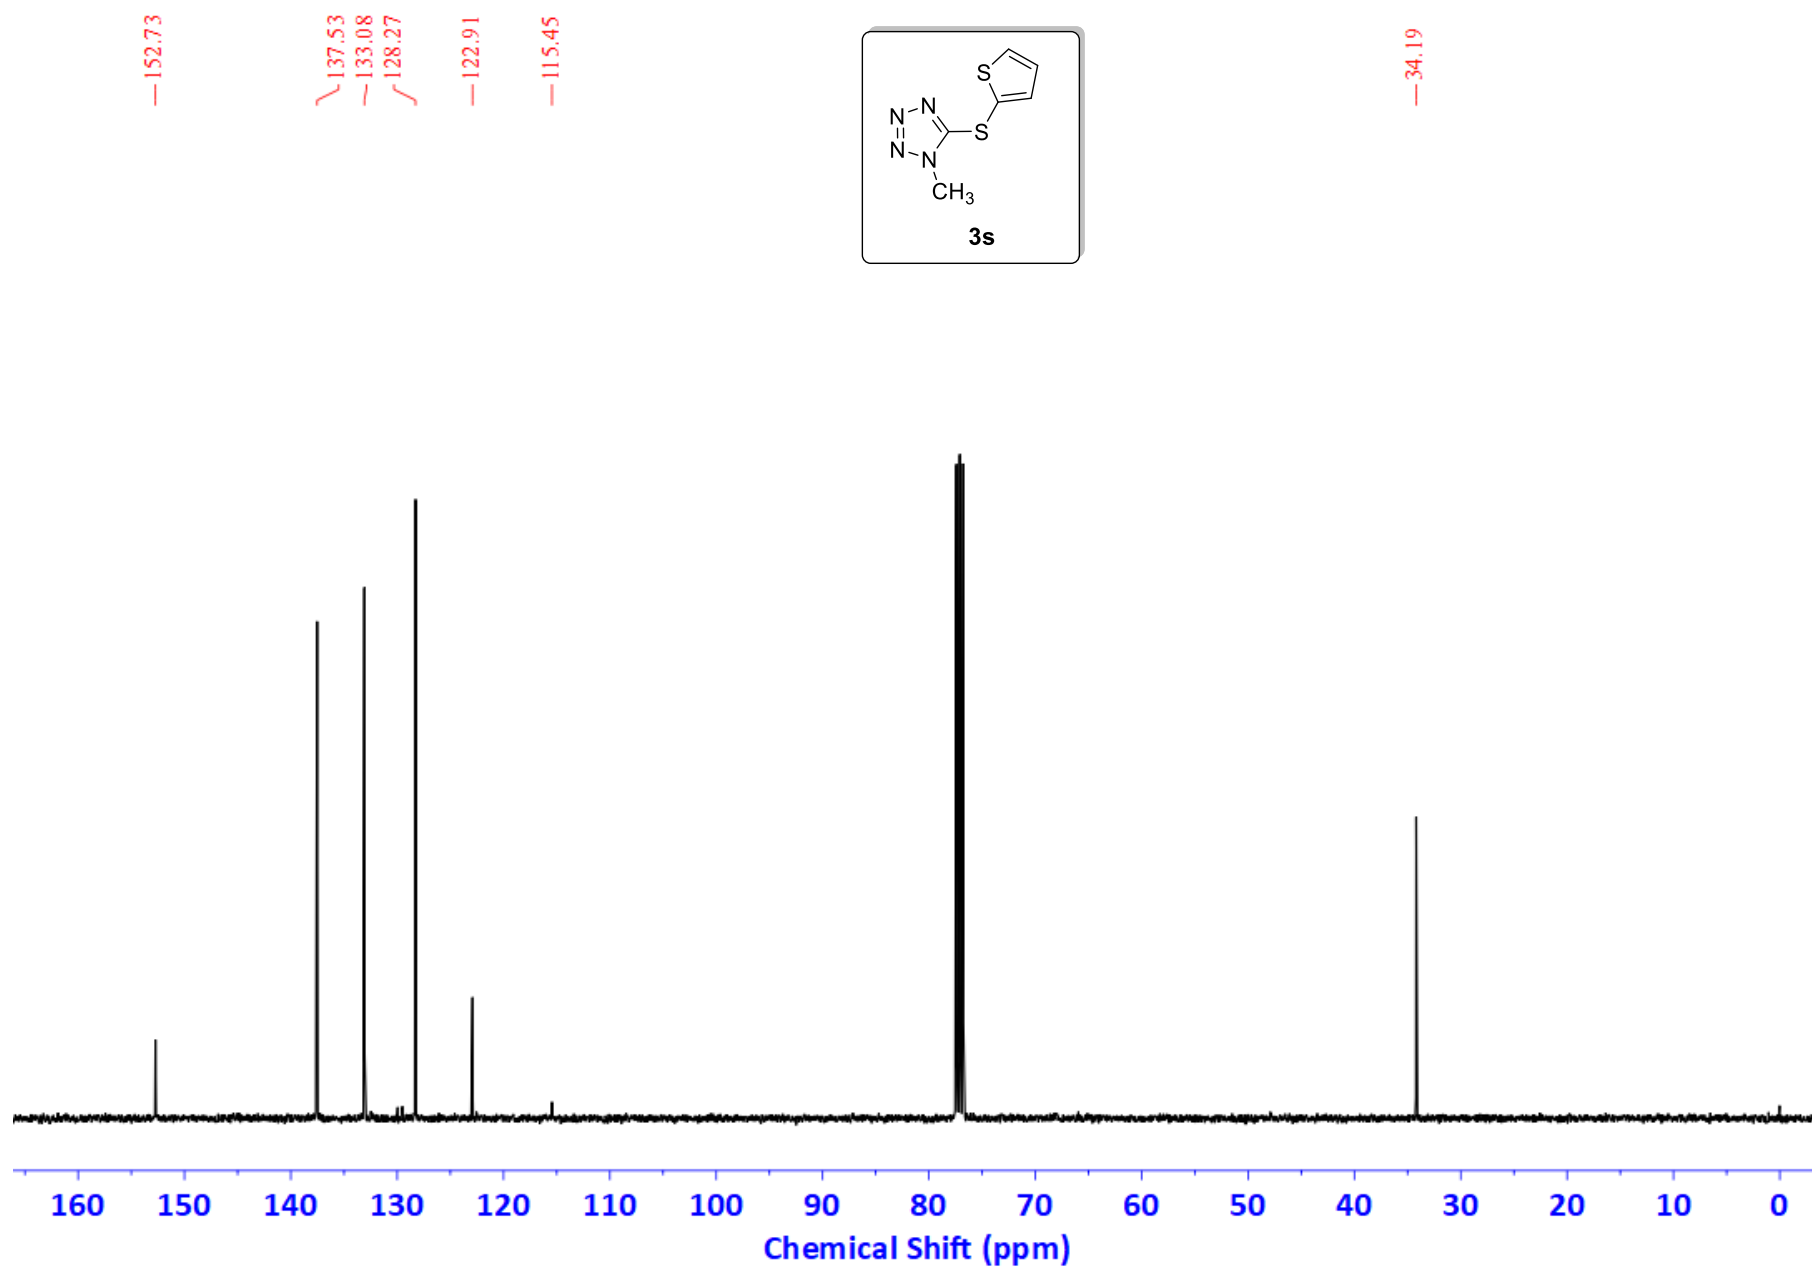

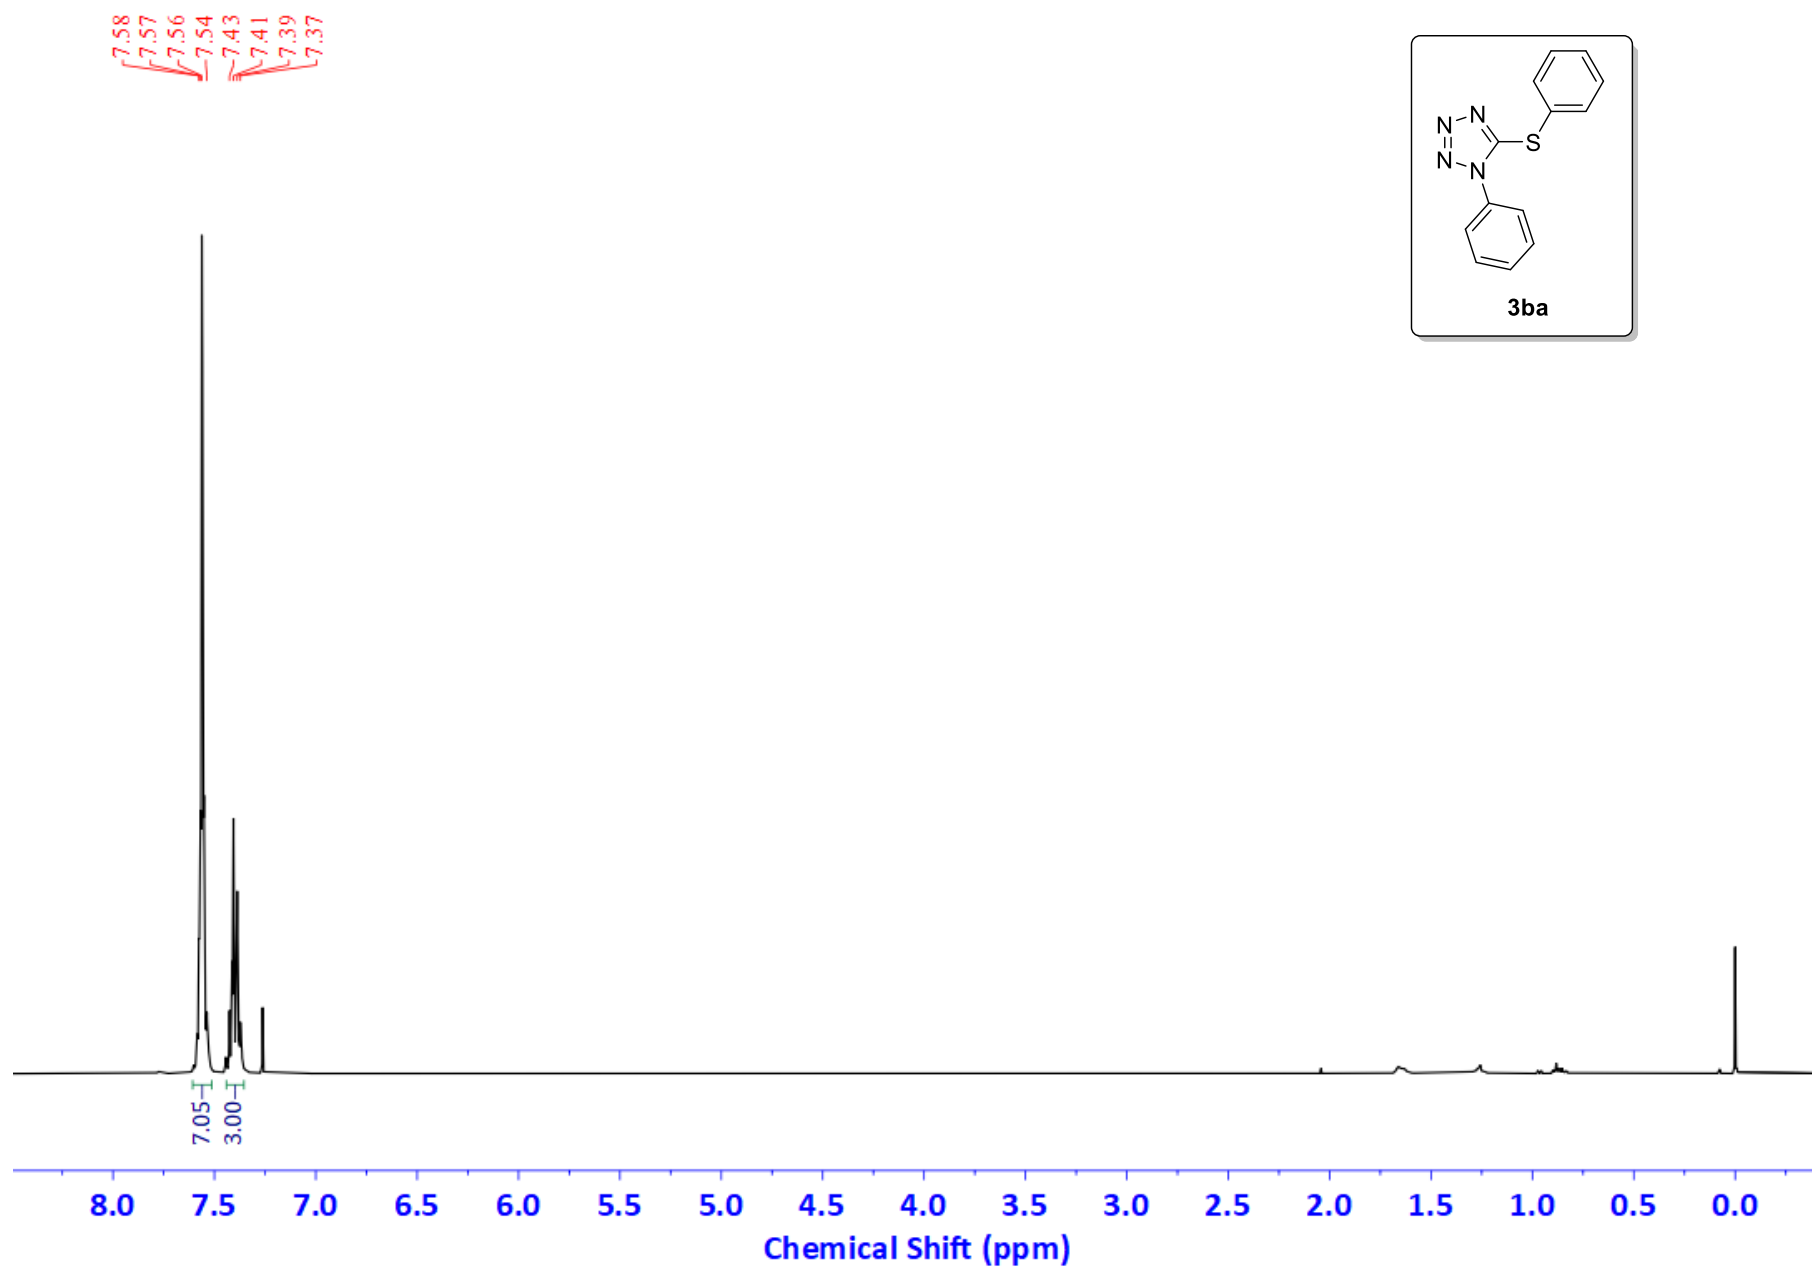

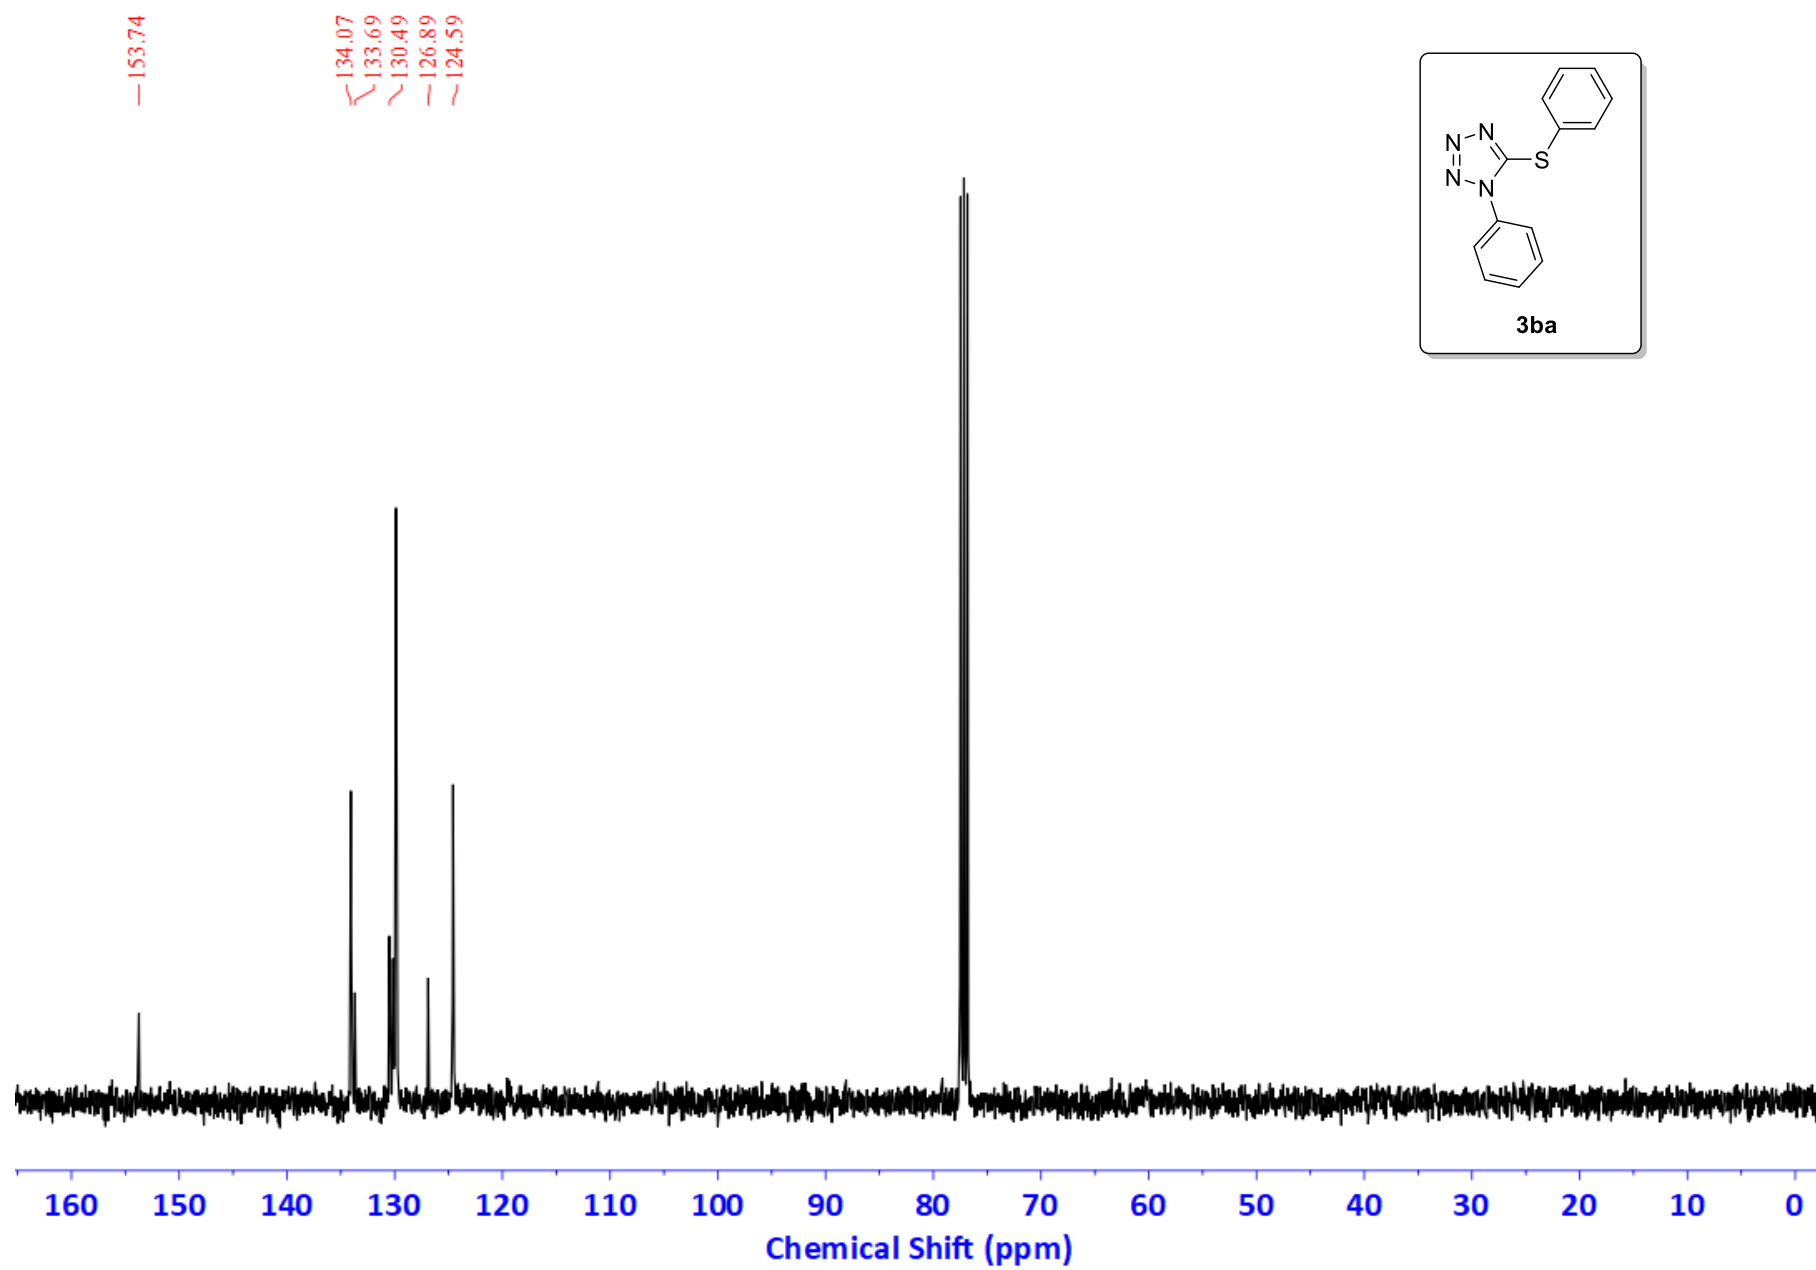

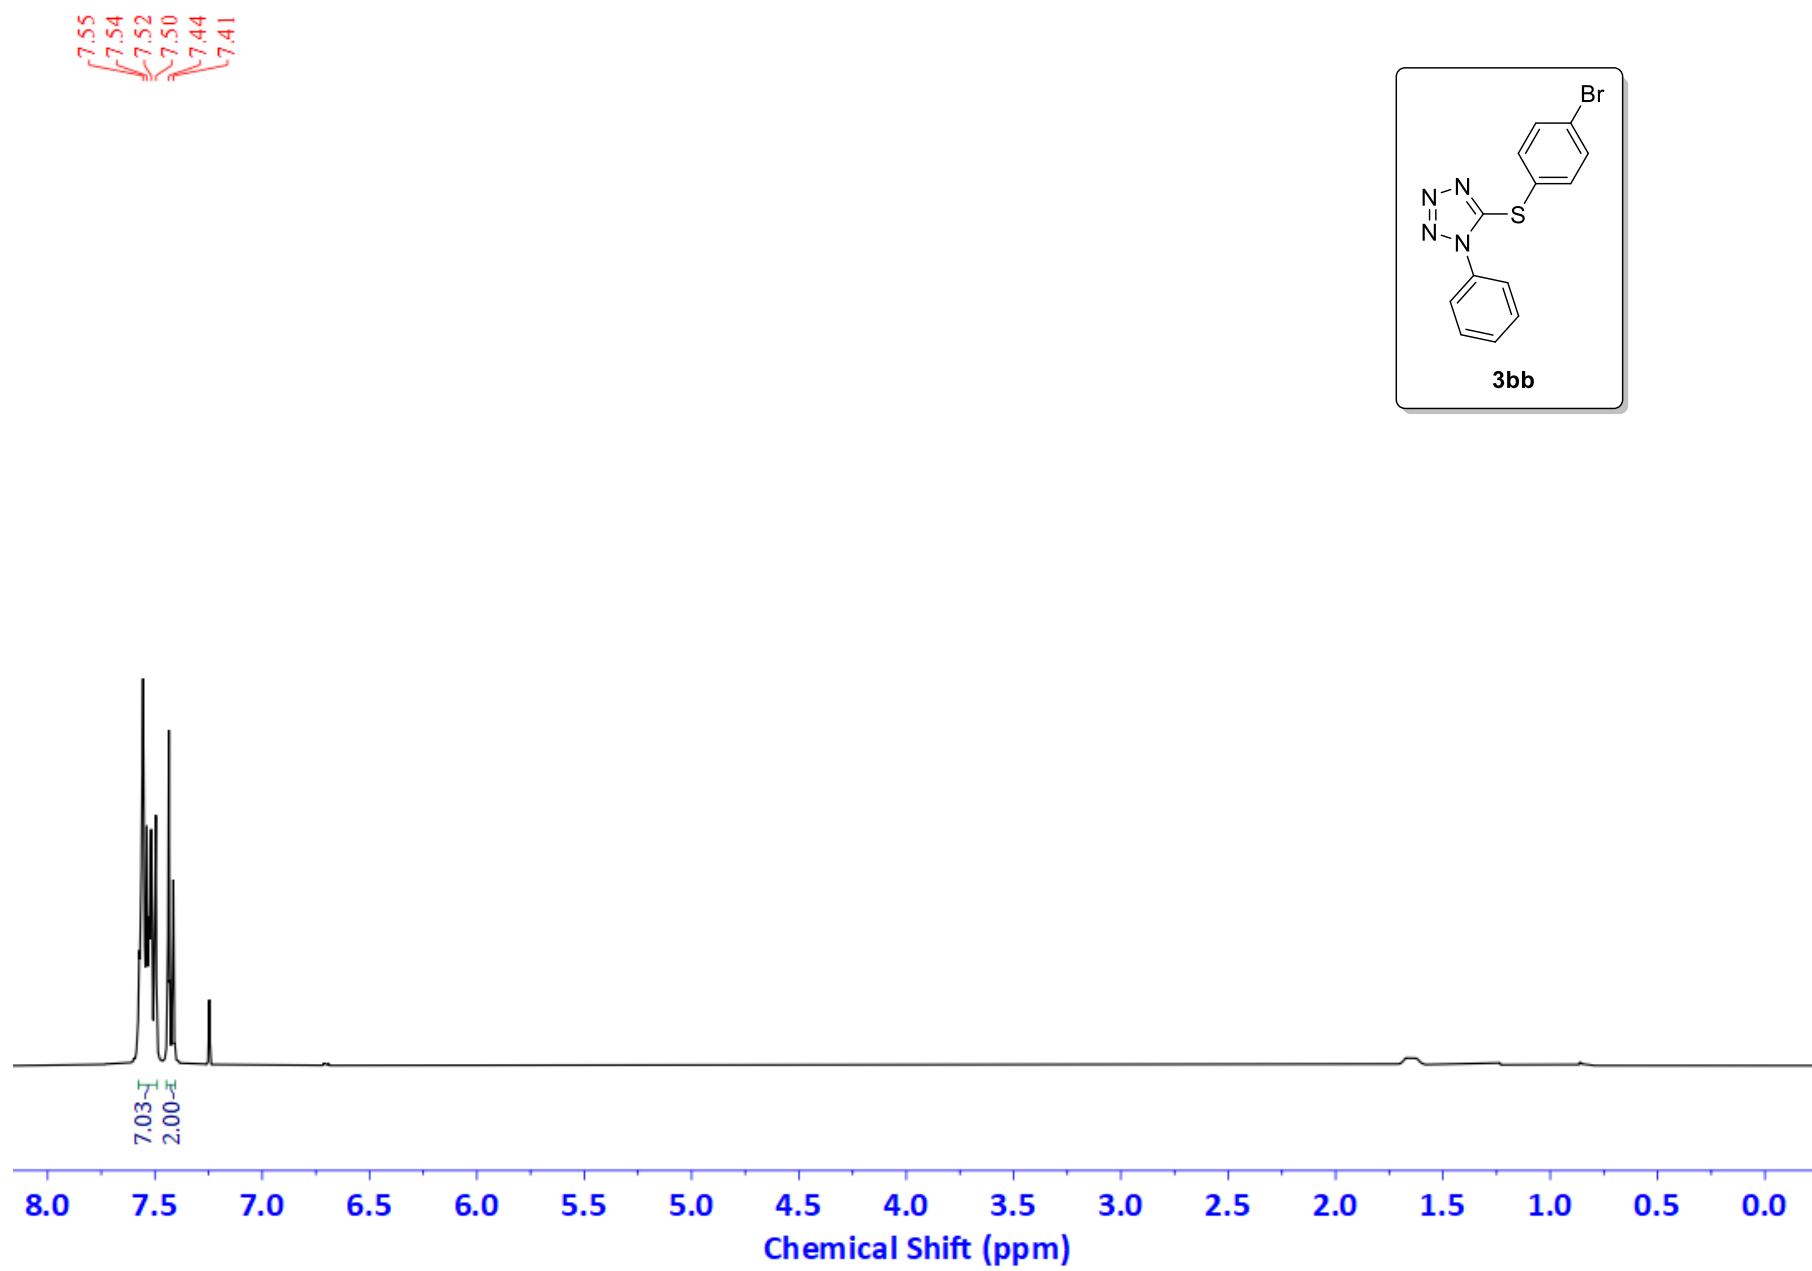

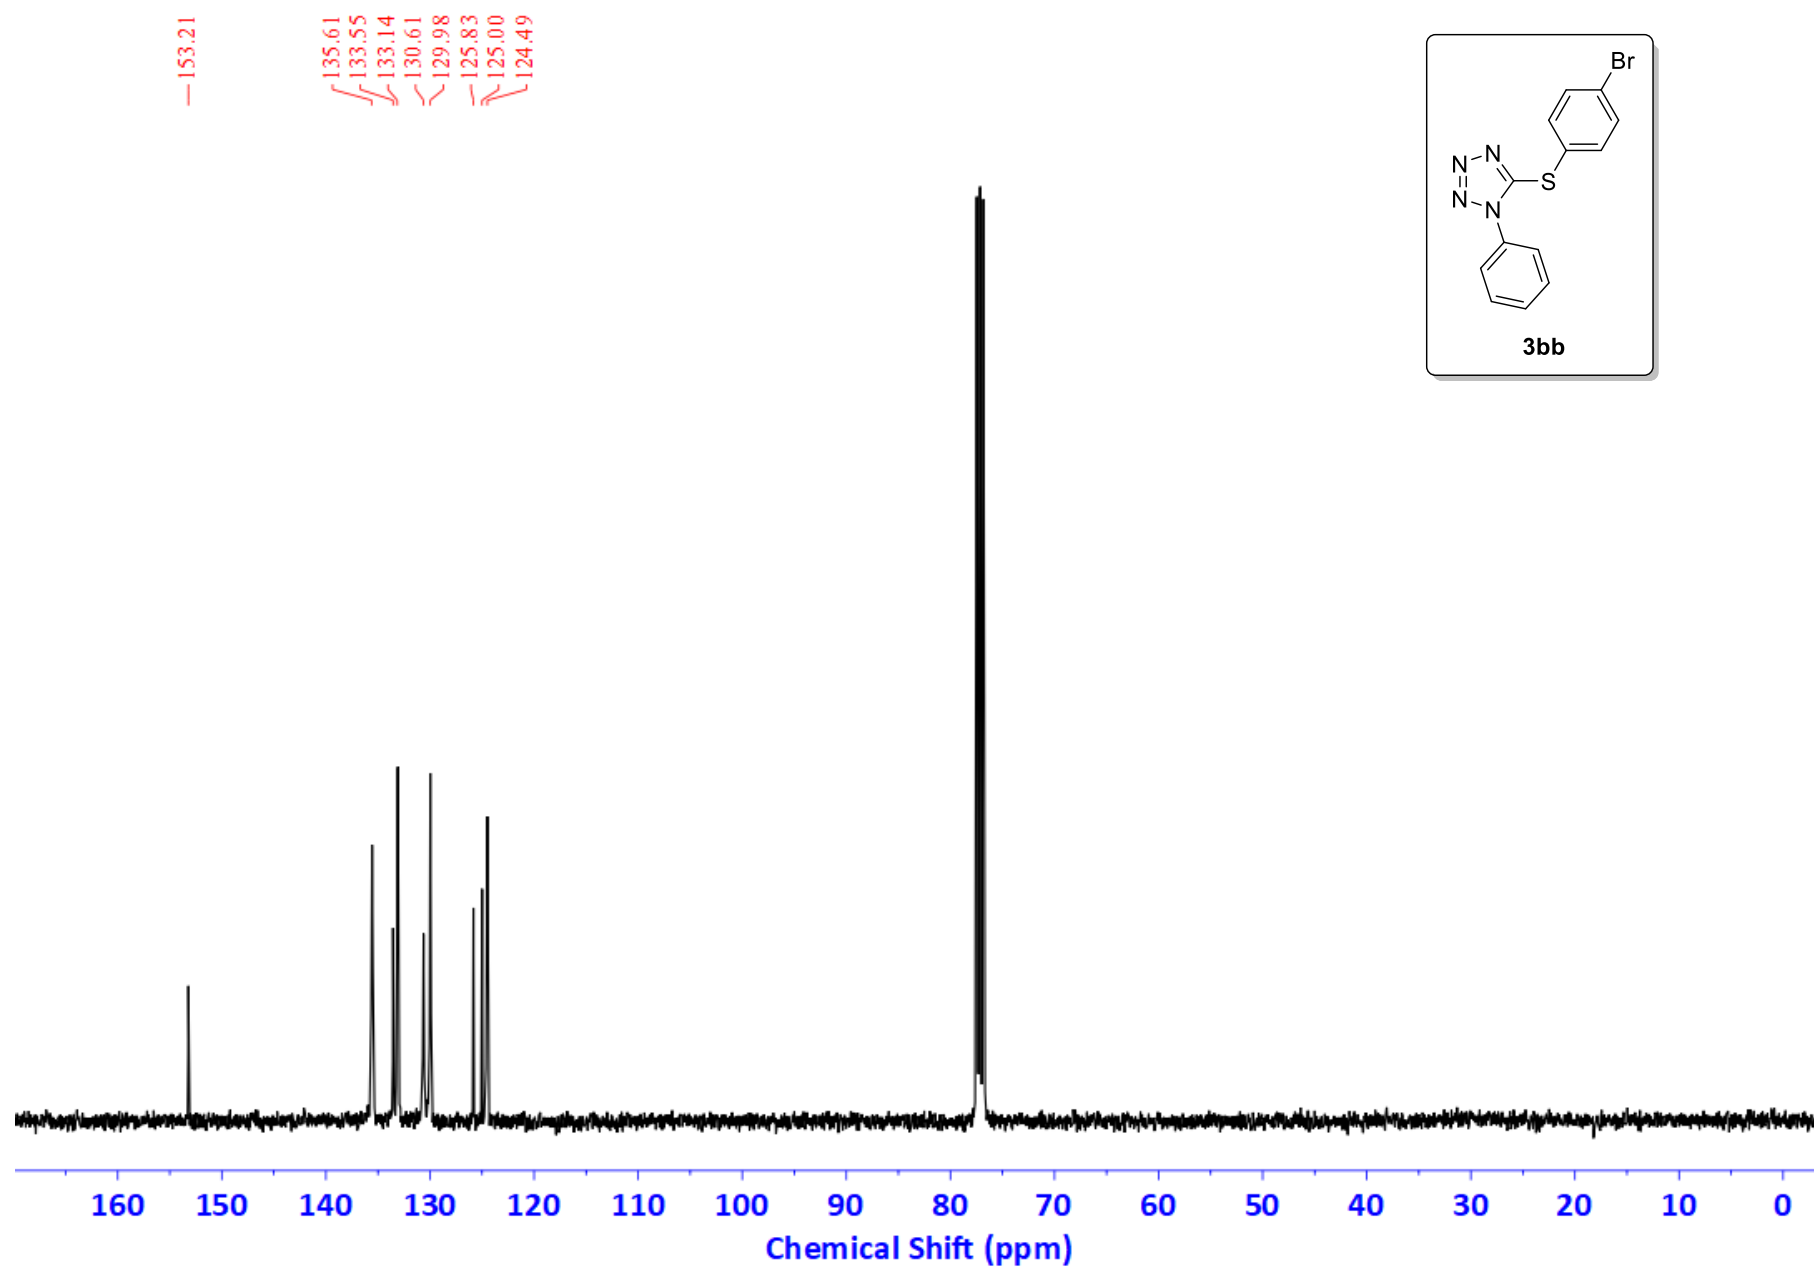

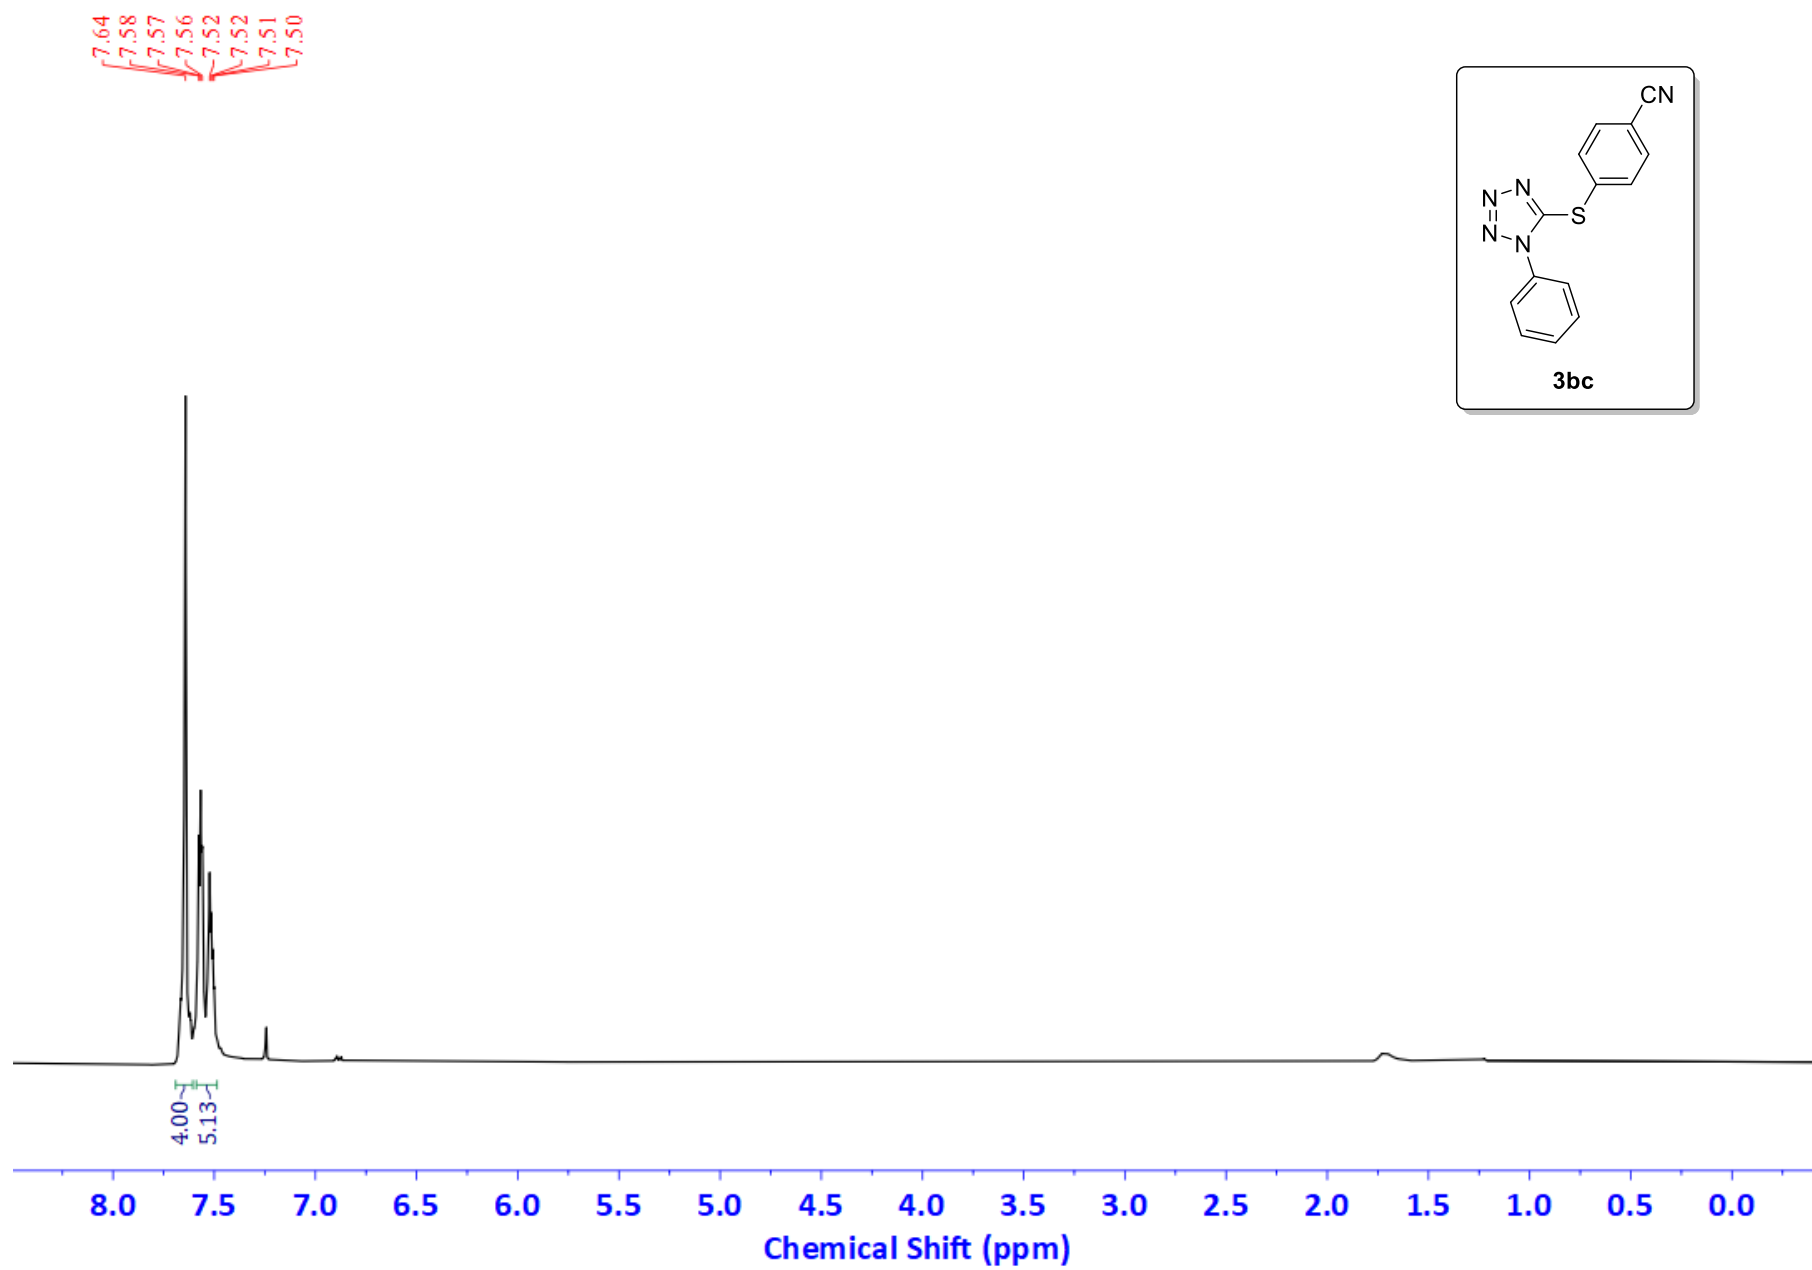

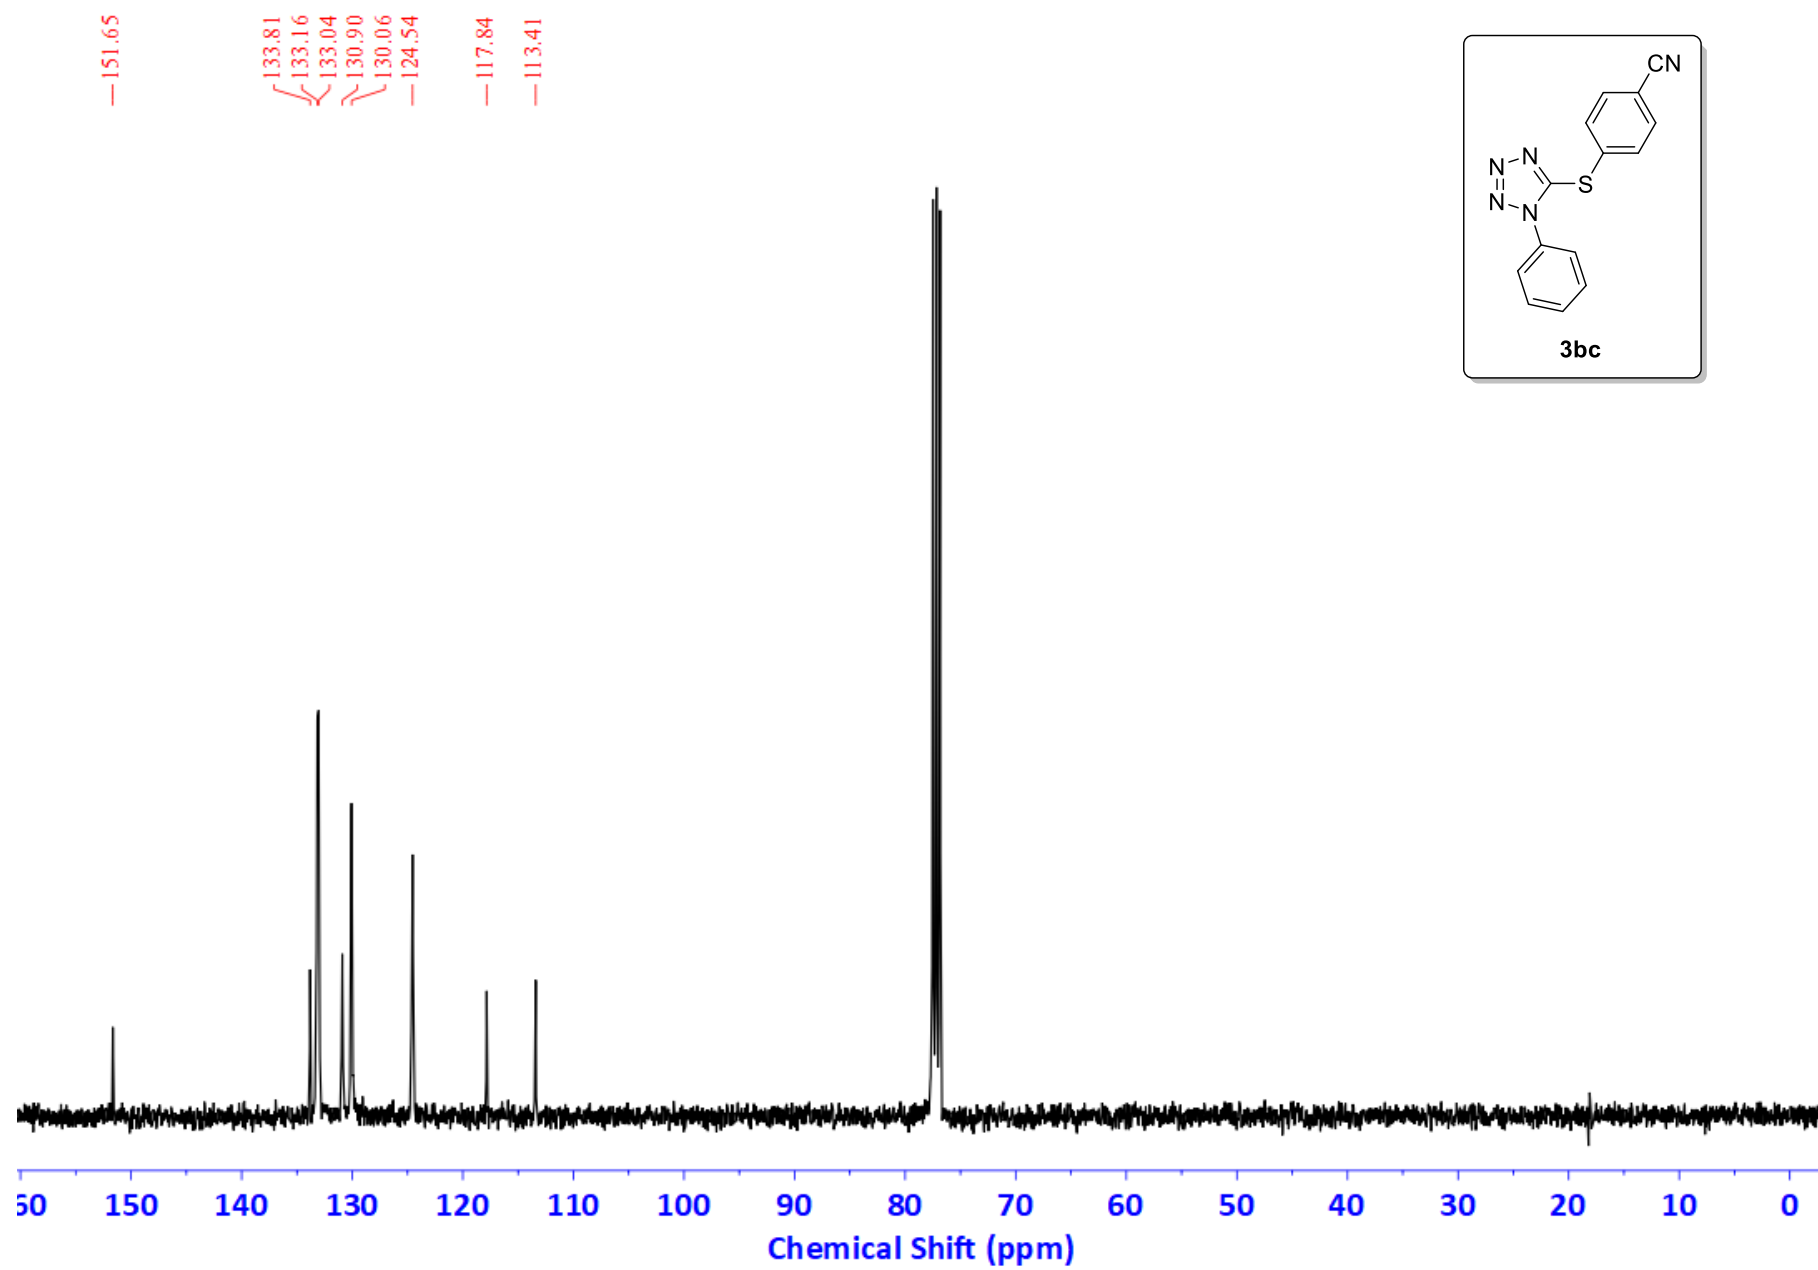



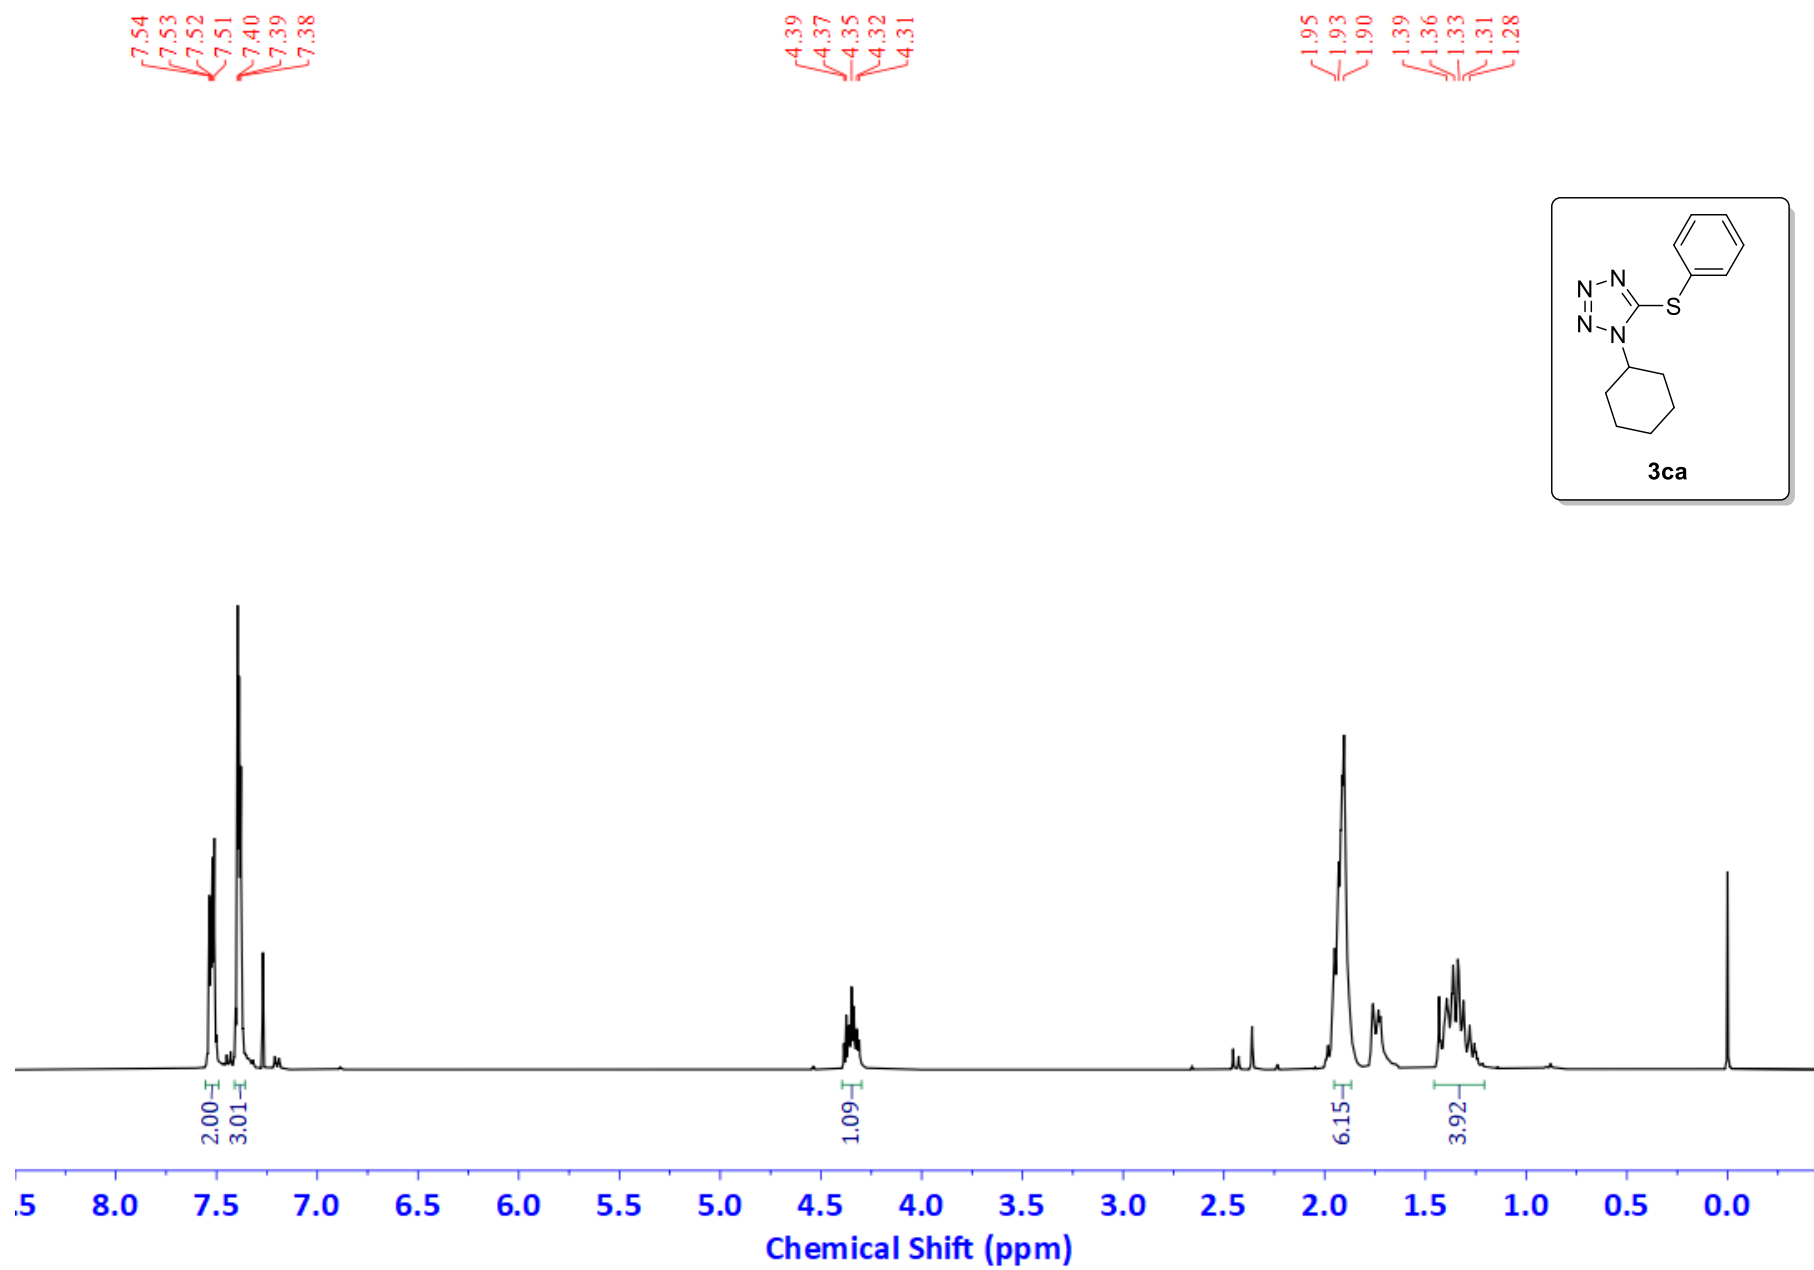

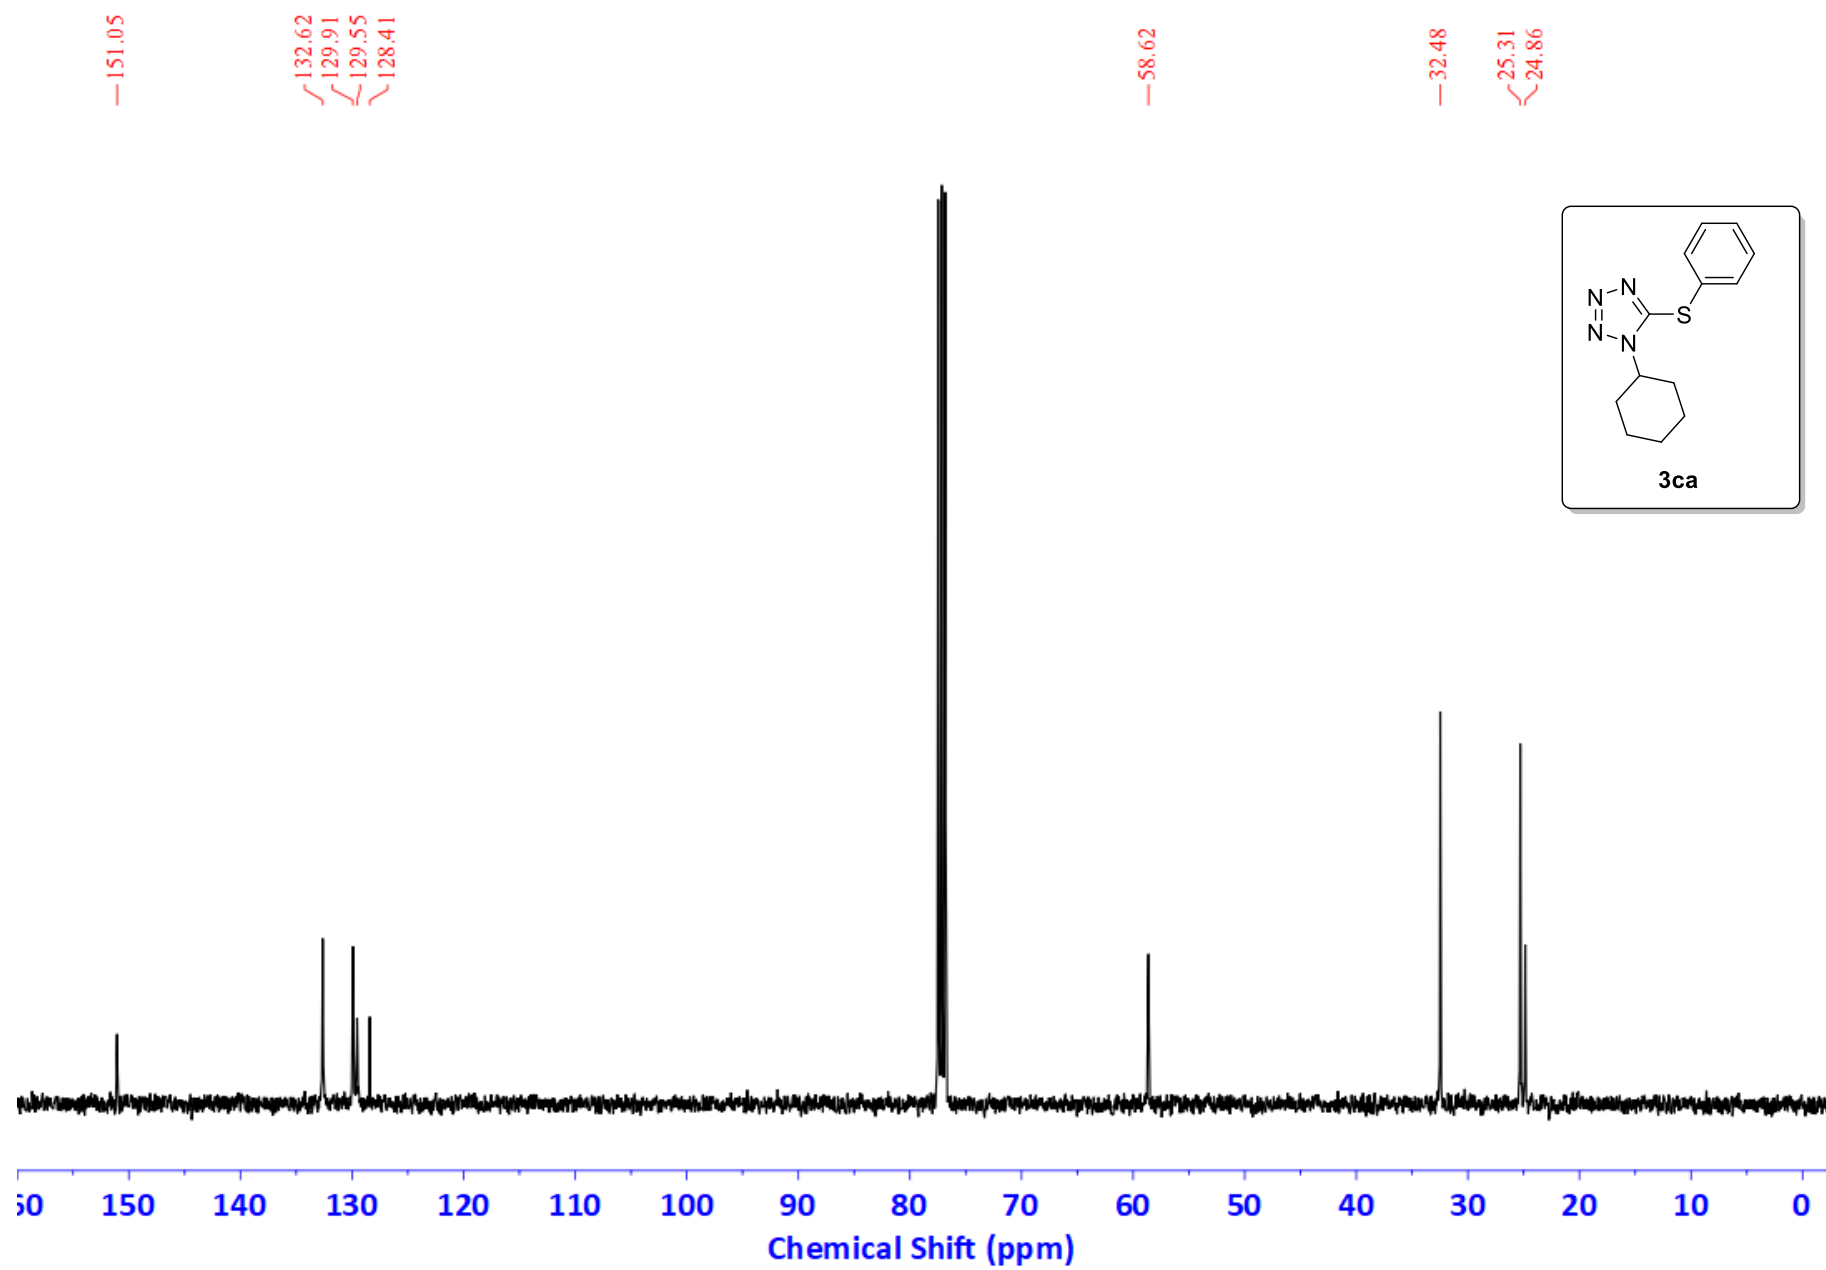

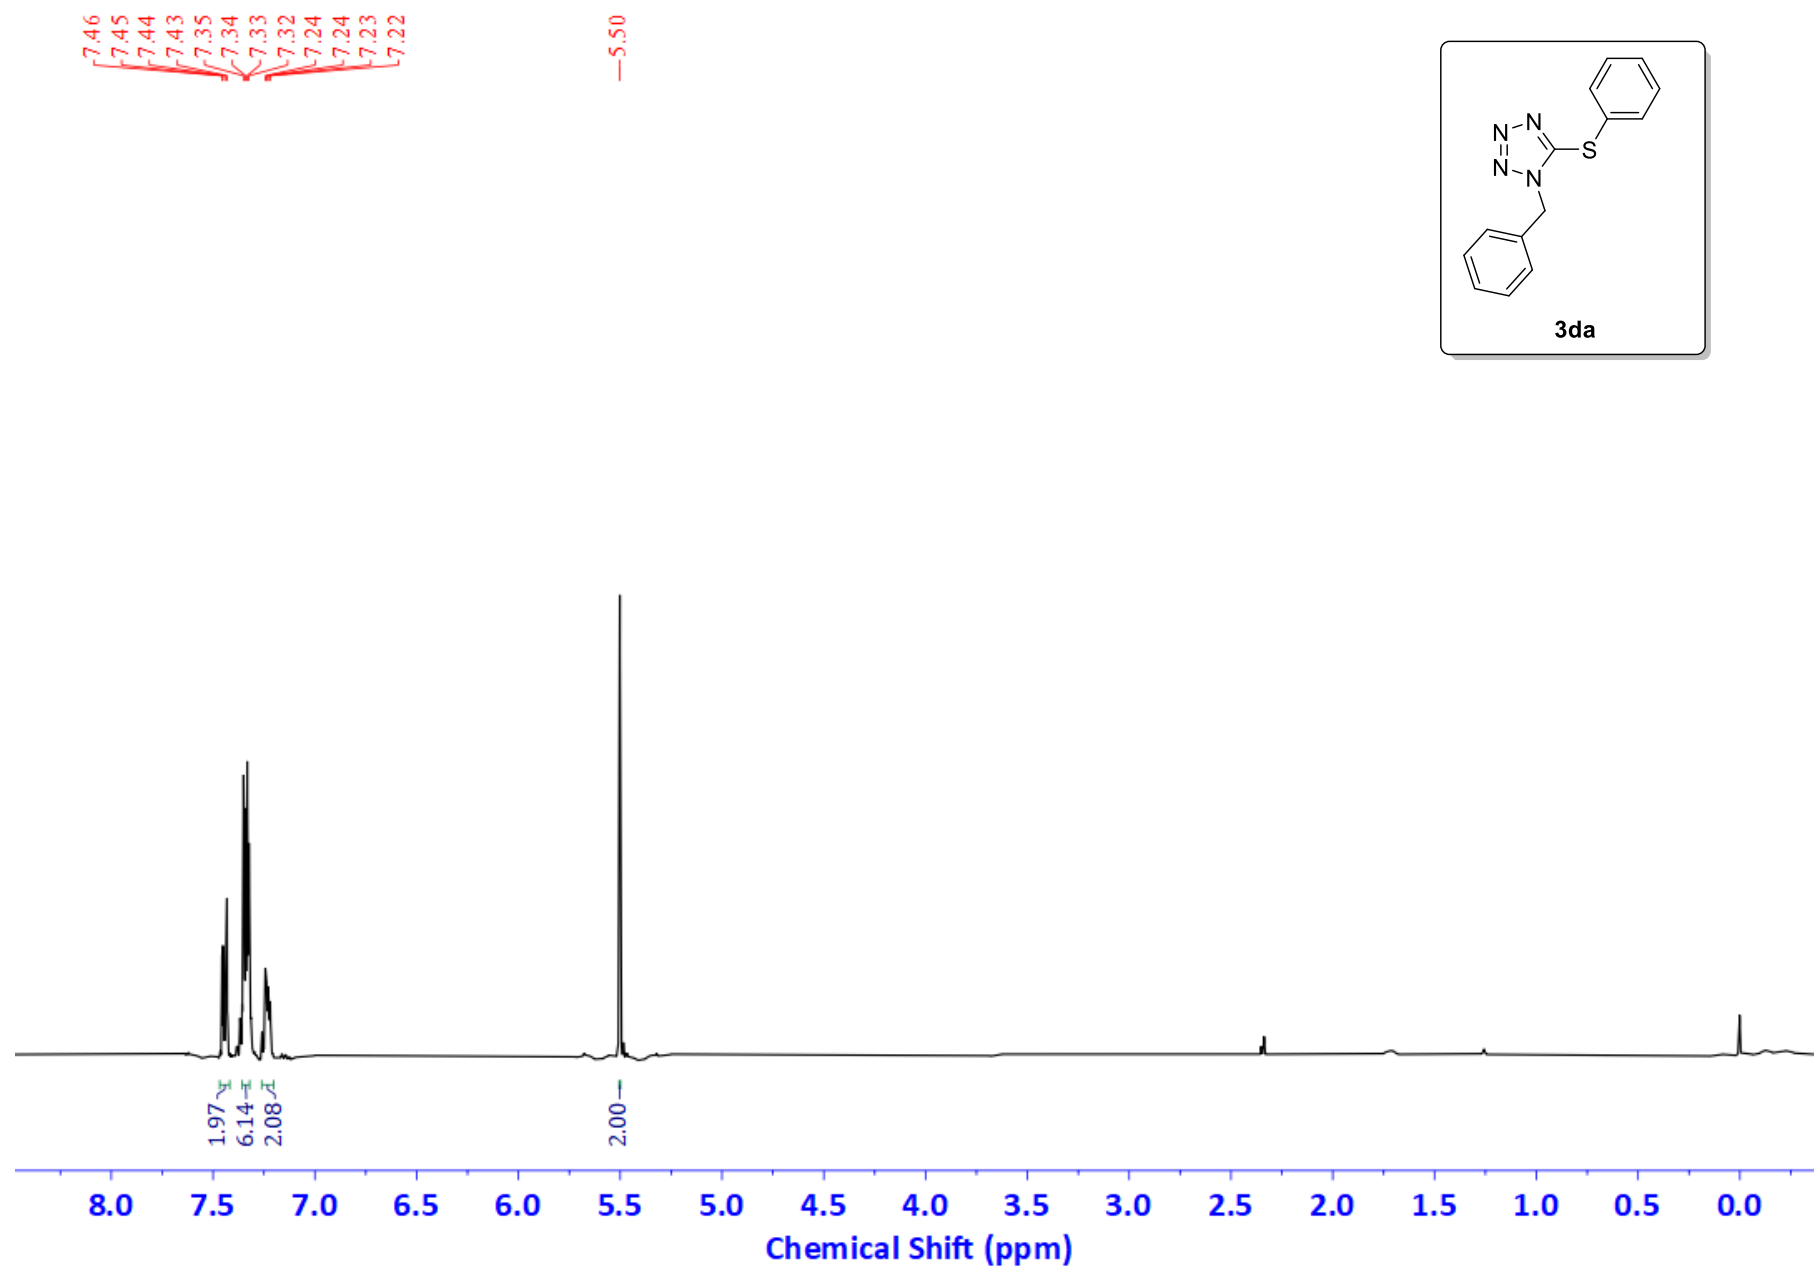

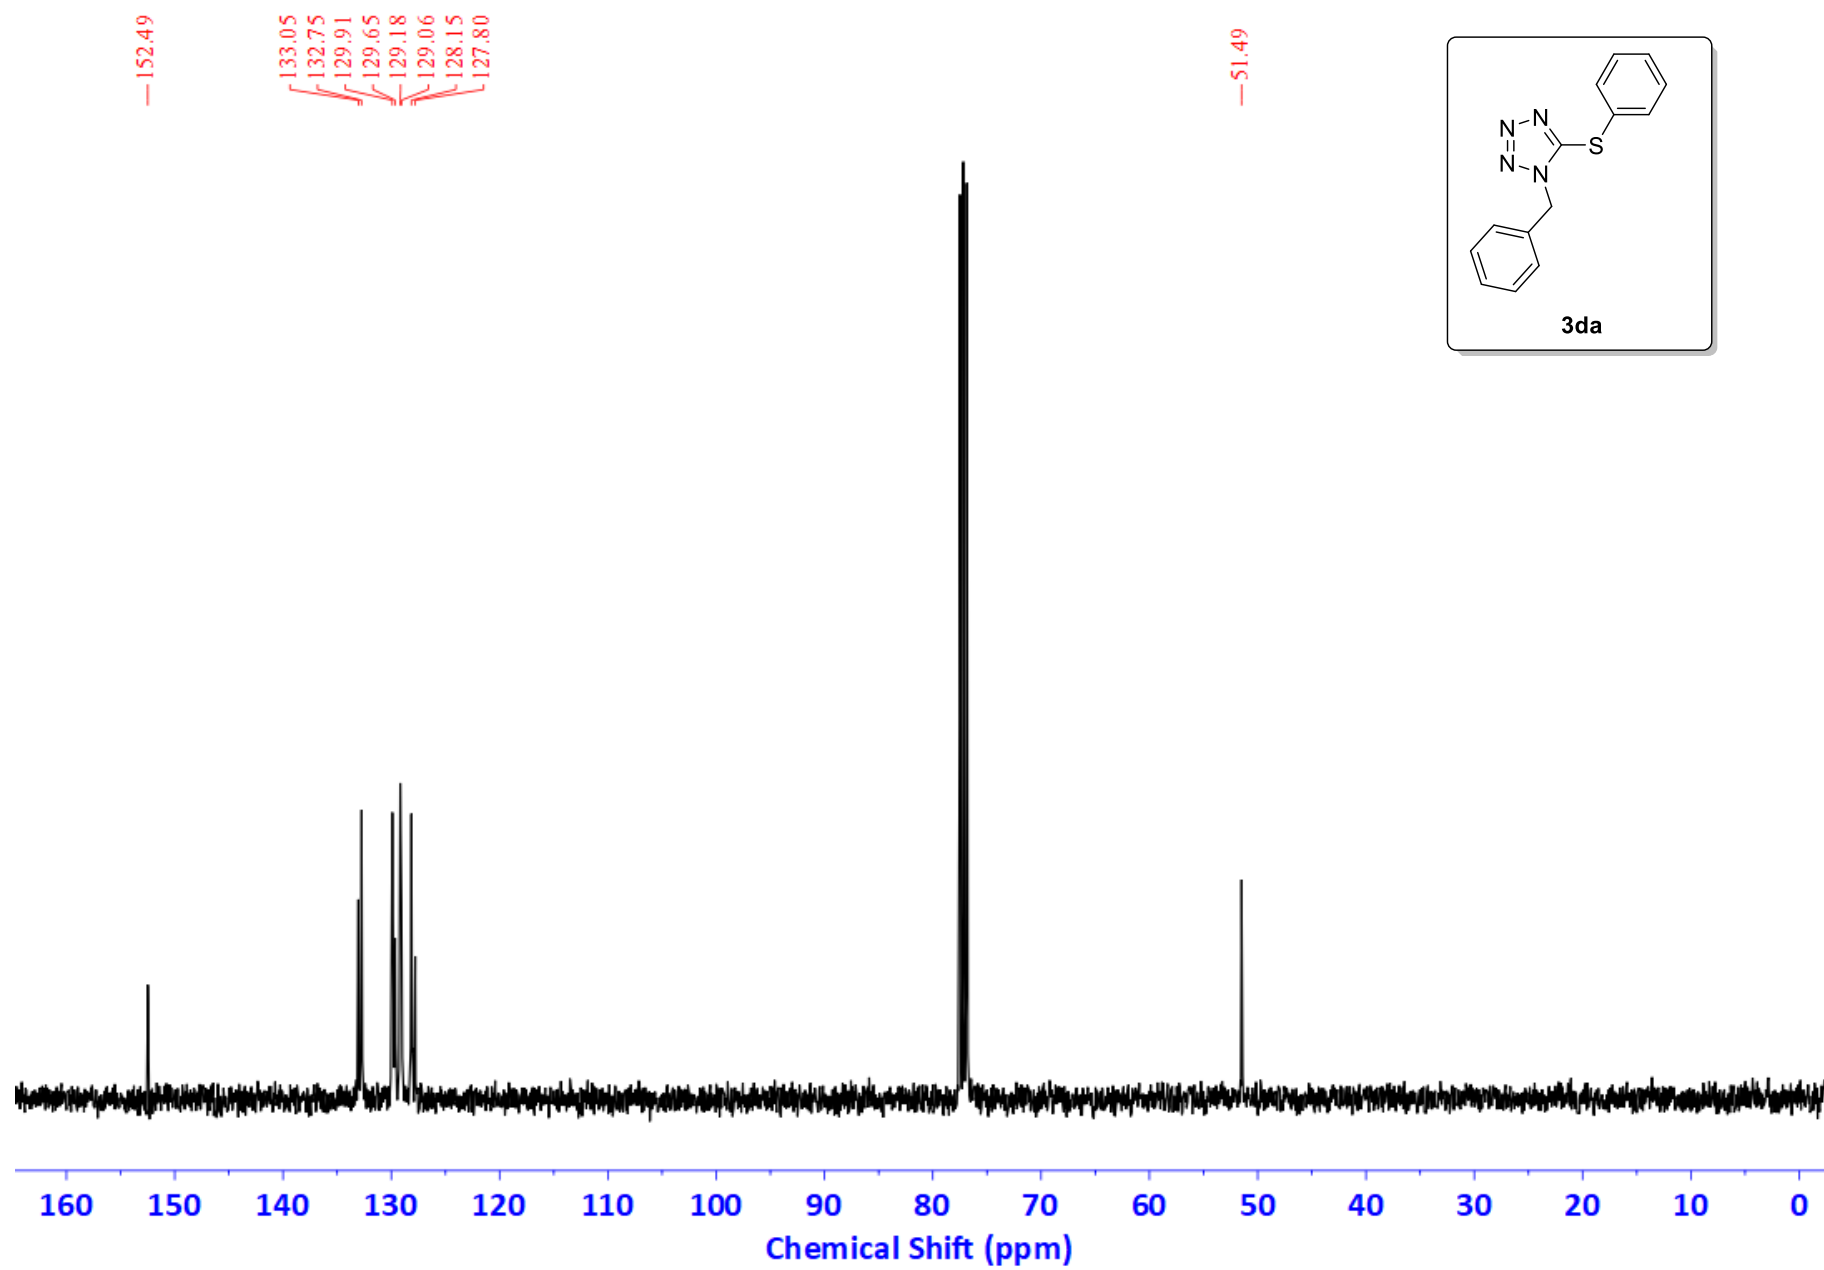

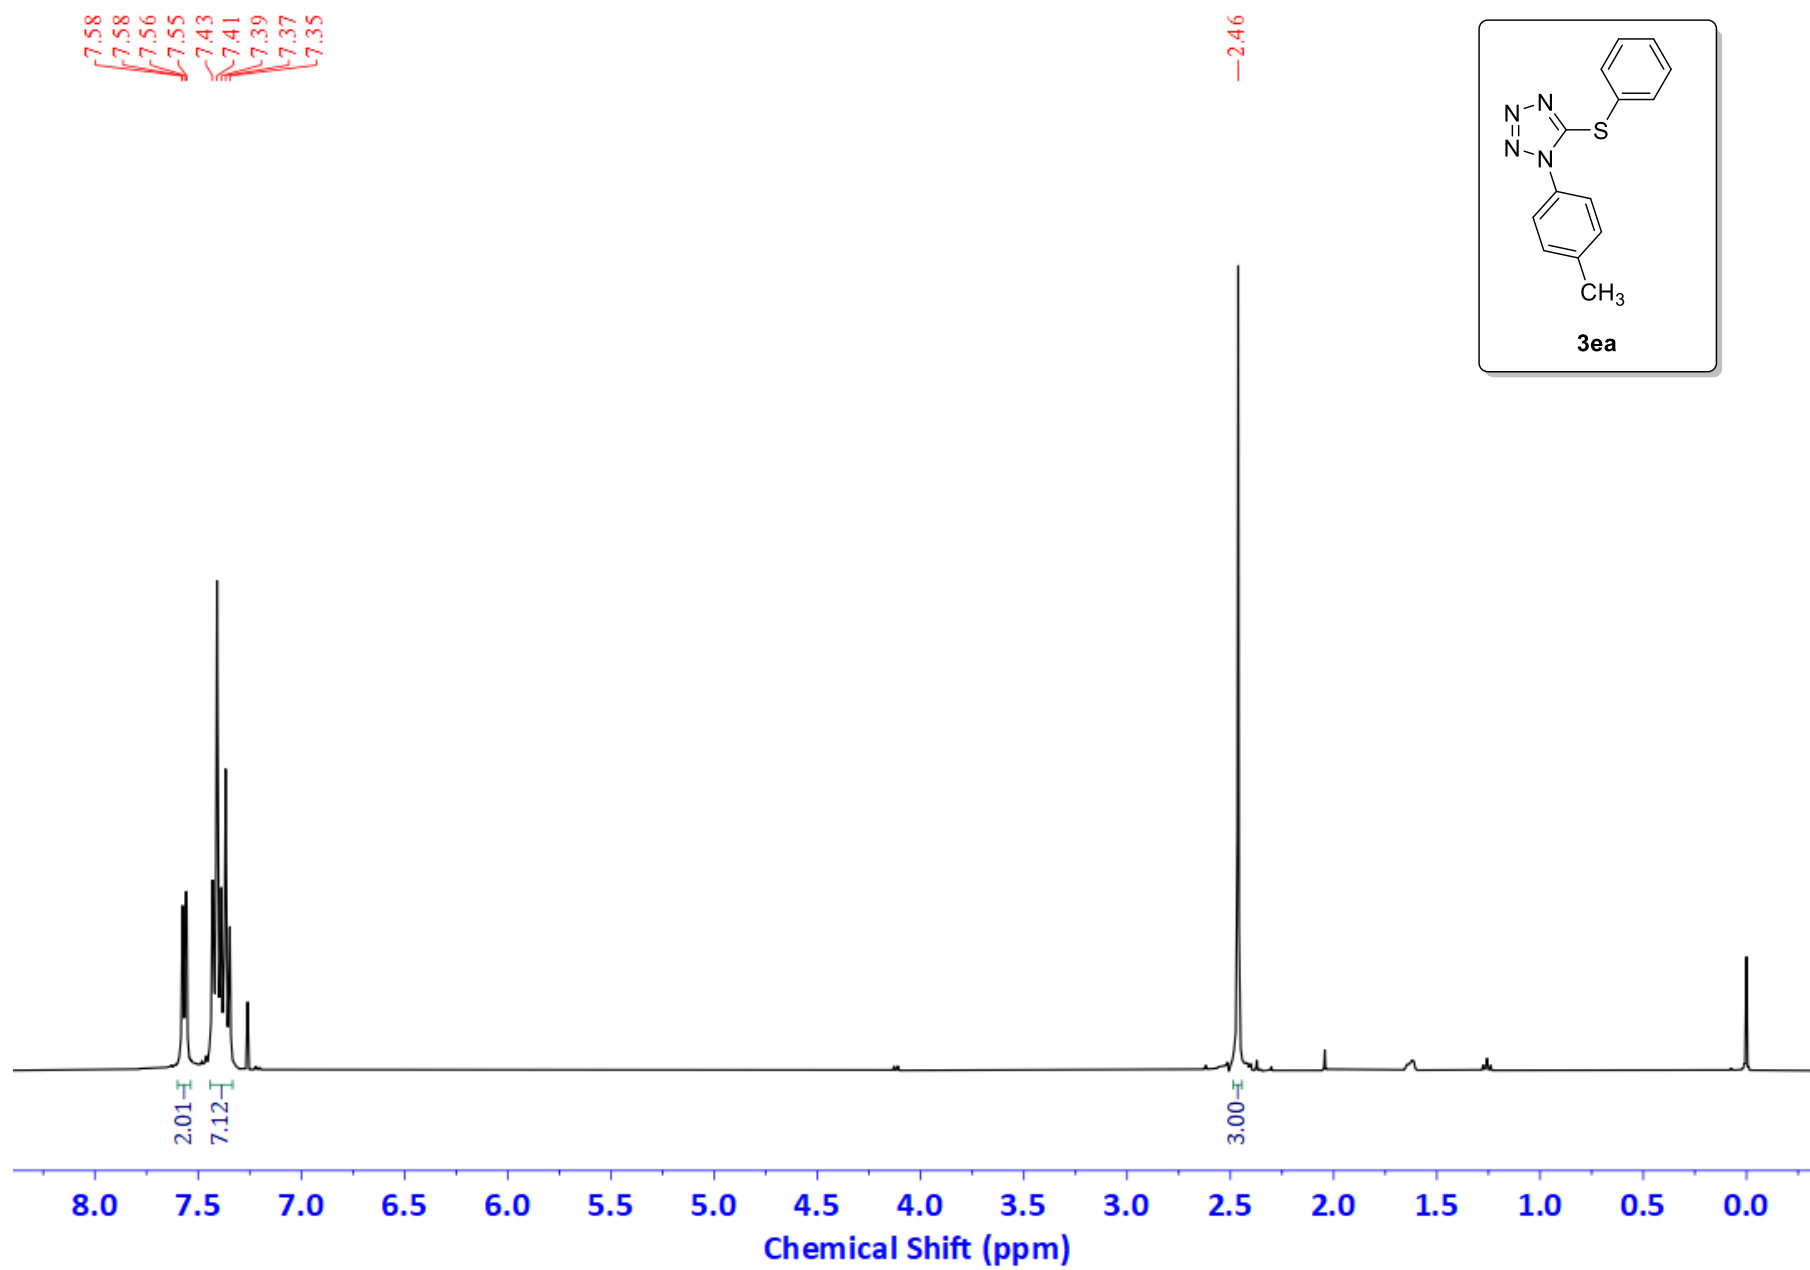

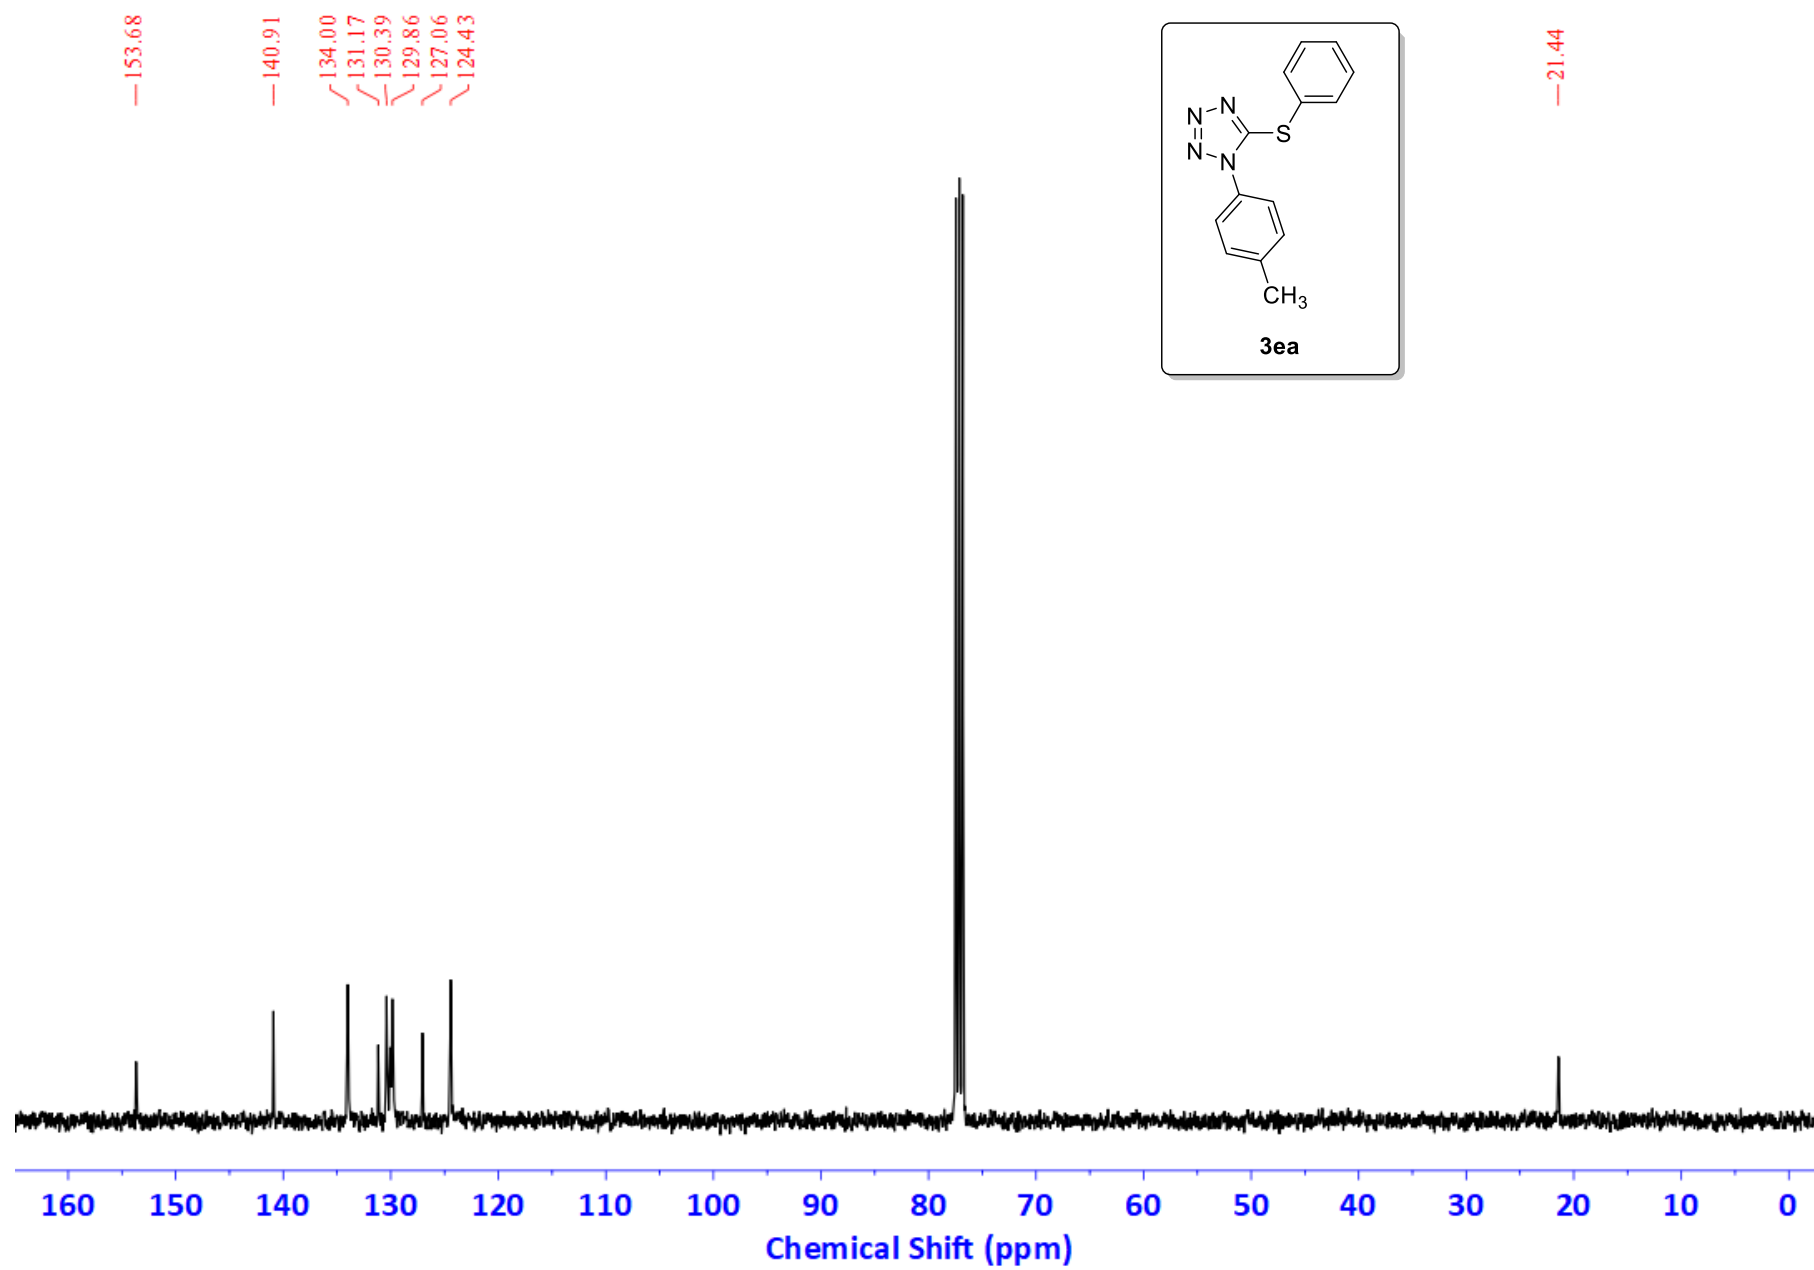

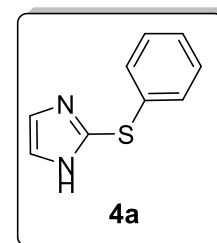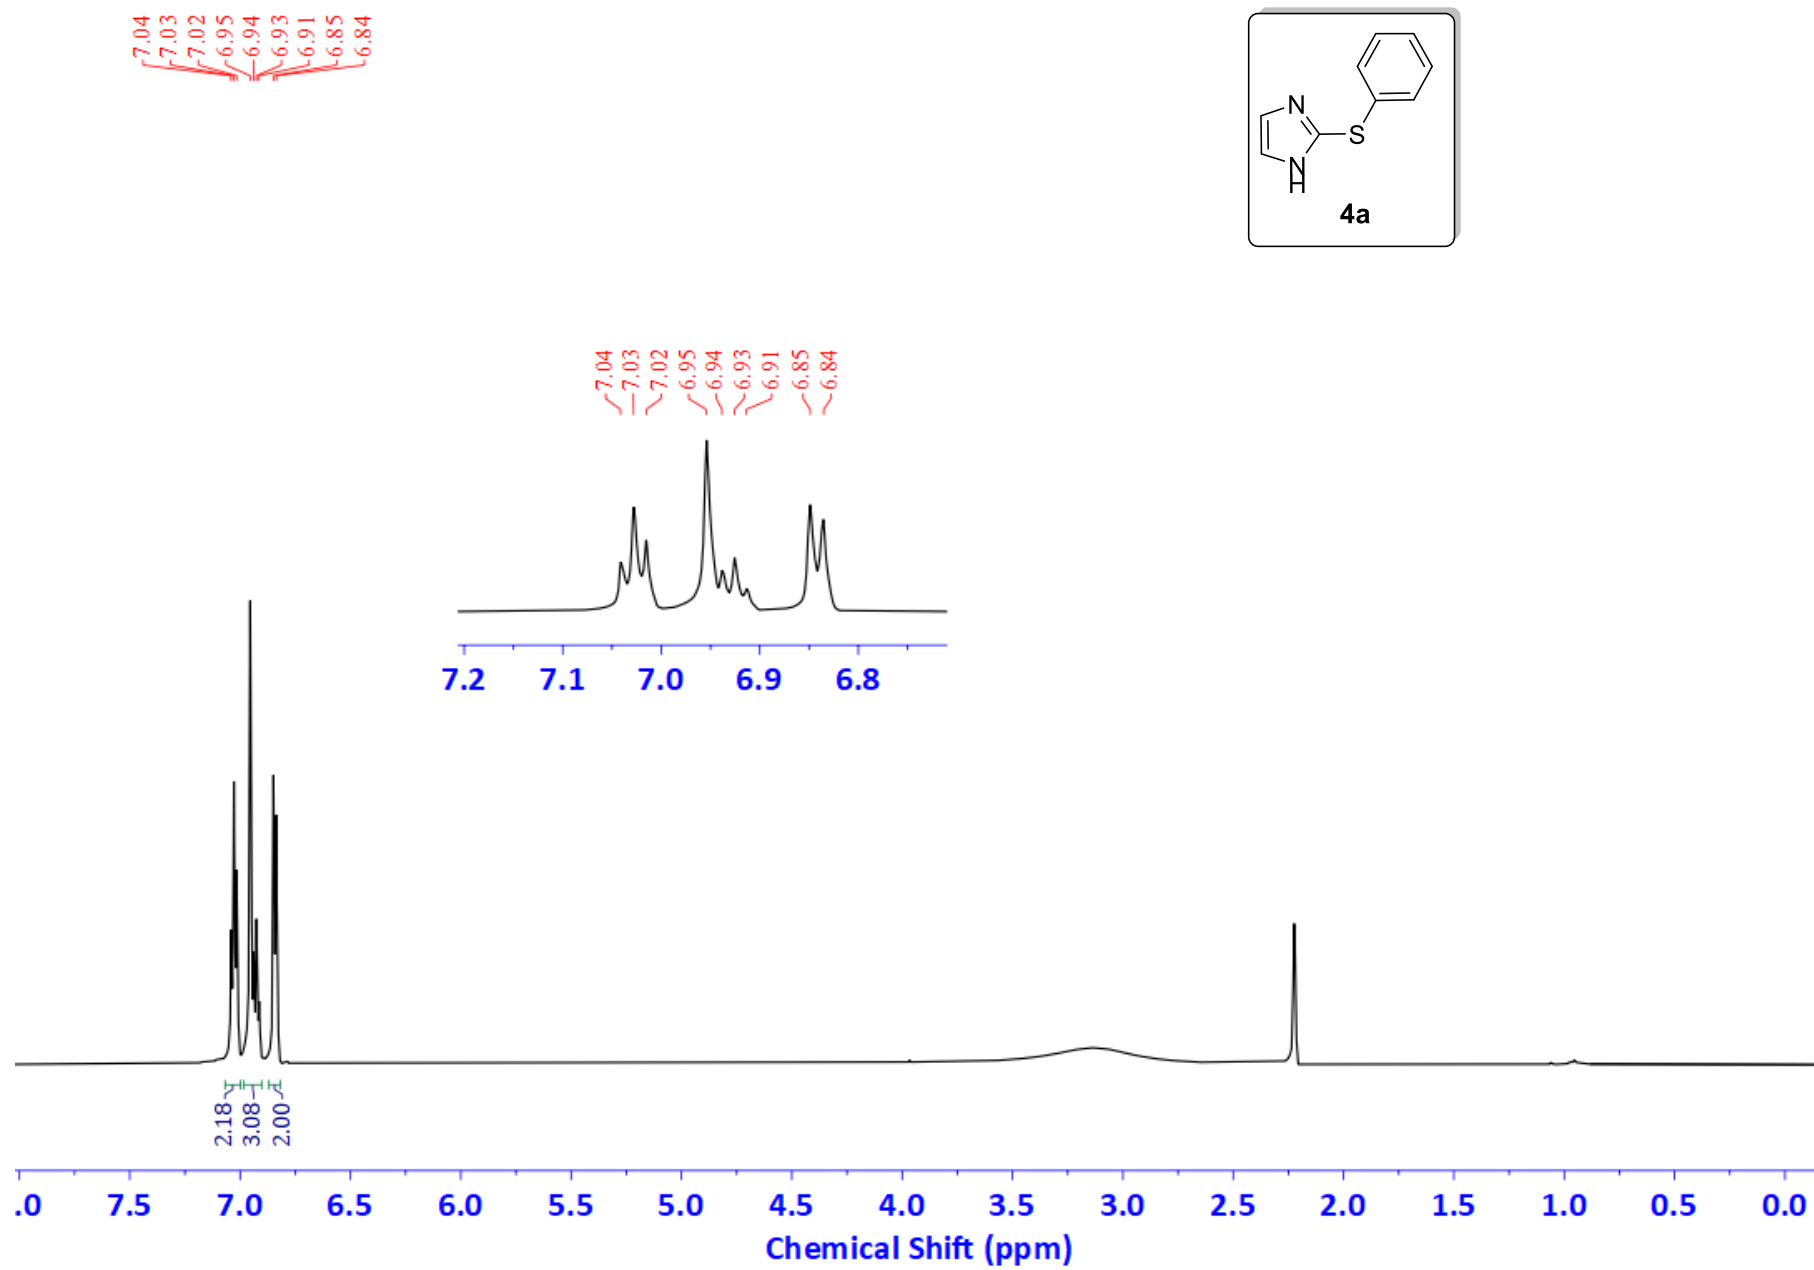

134.93  
133.62  
128.35  
126.34  
125.44

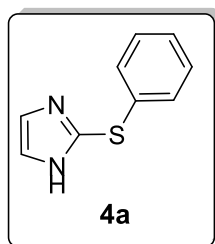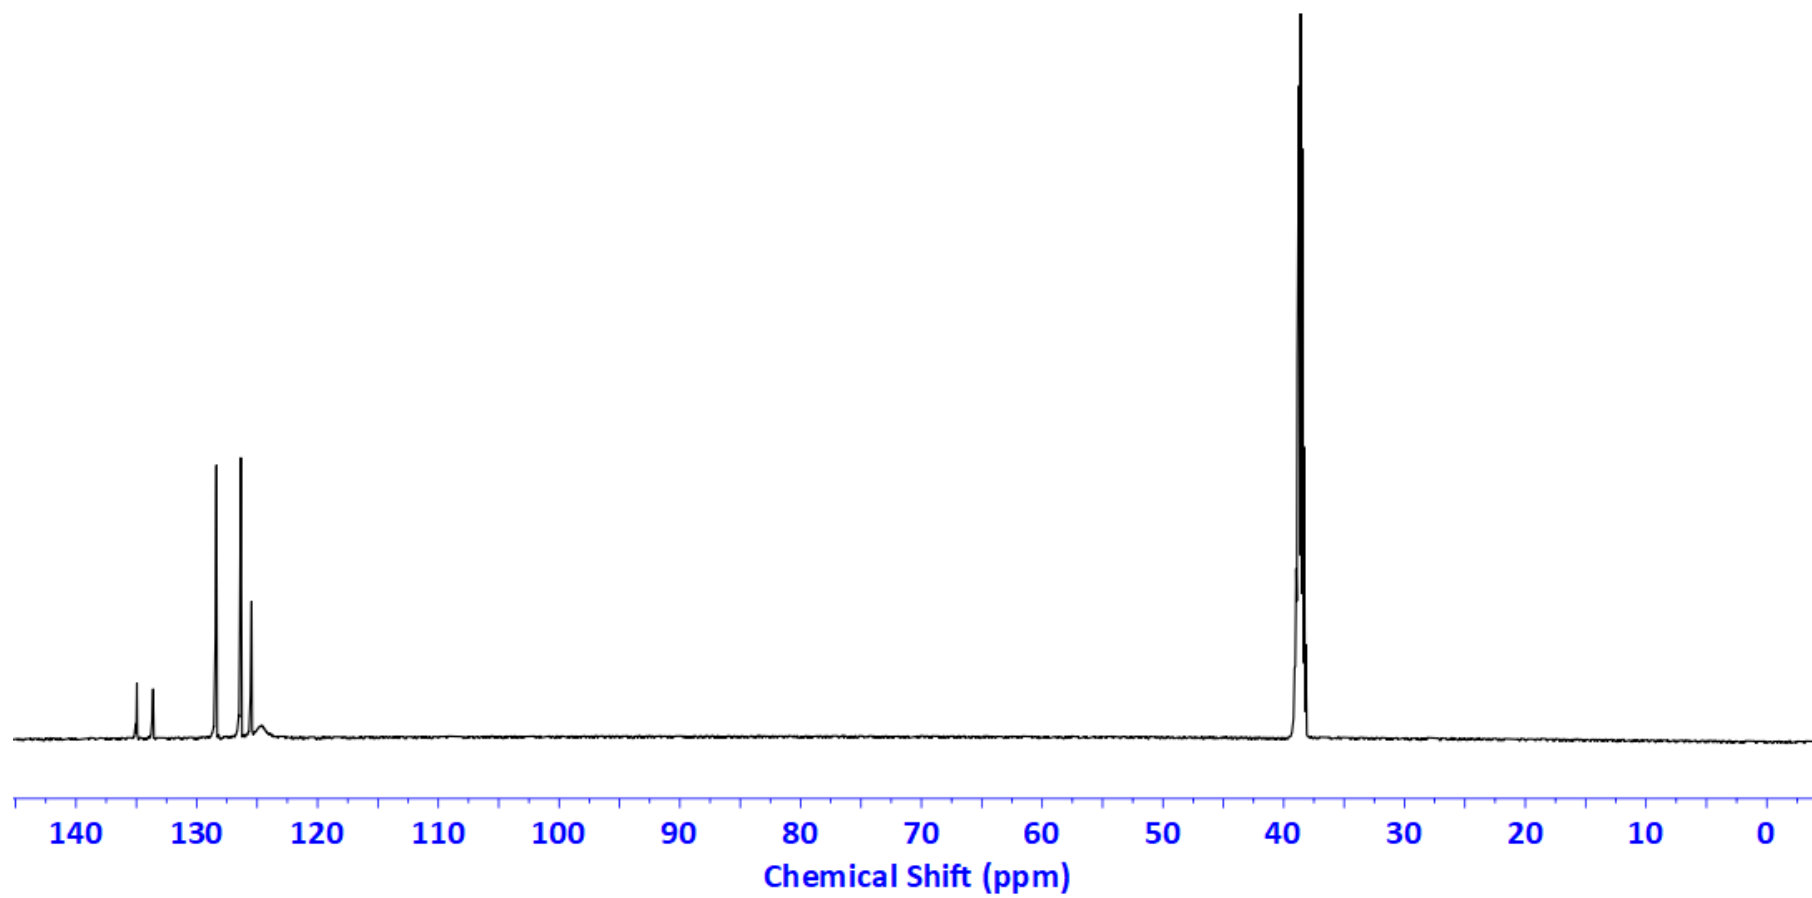



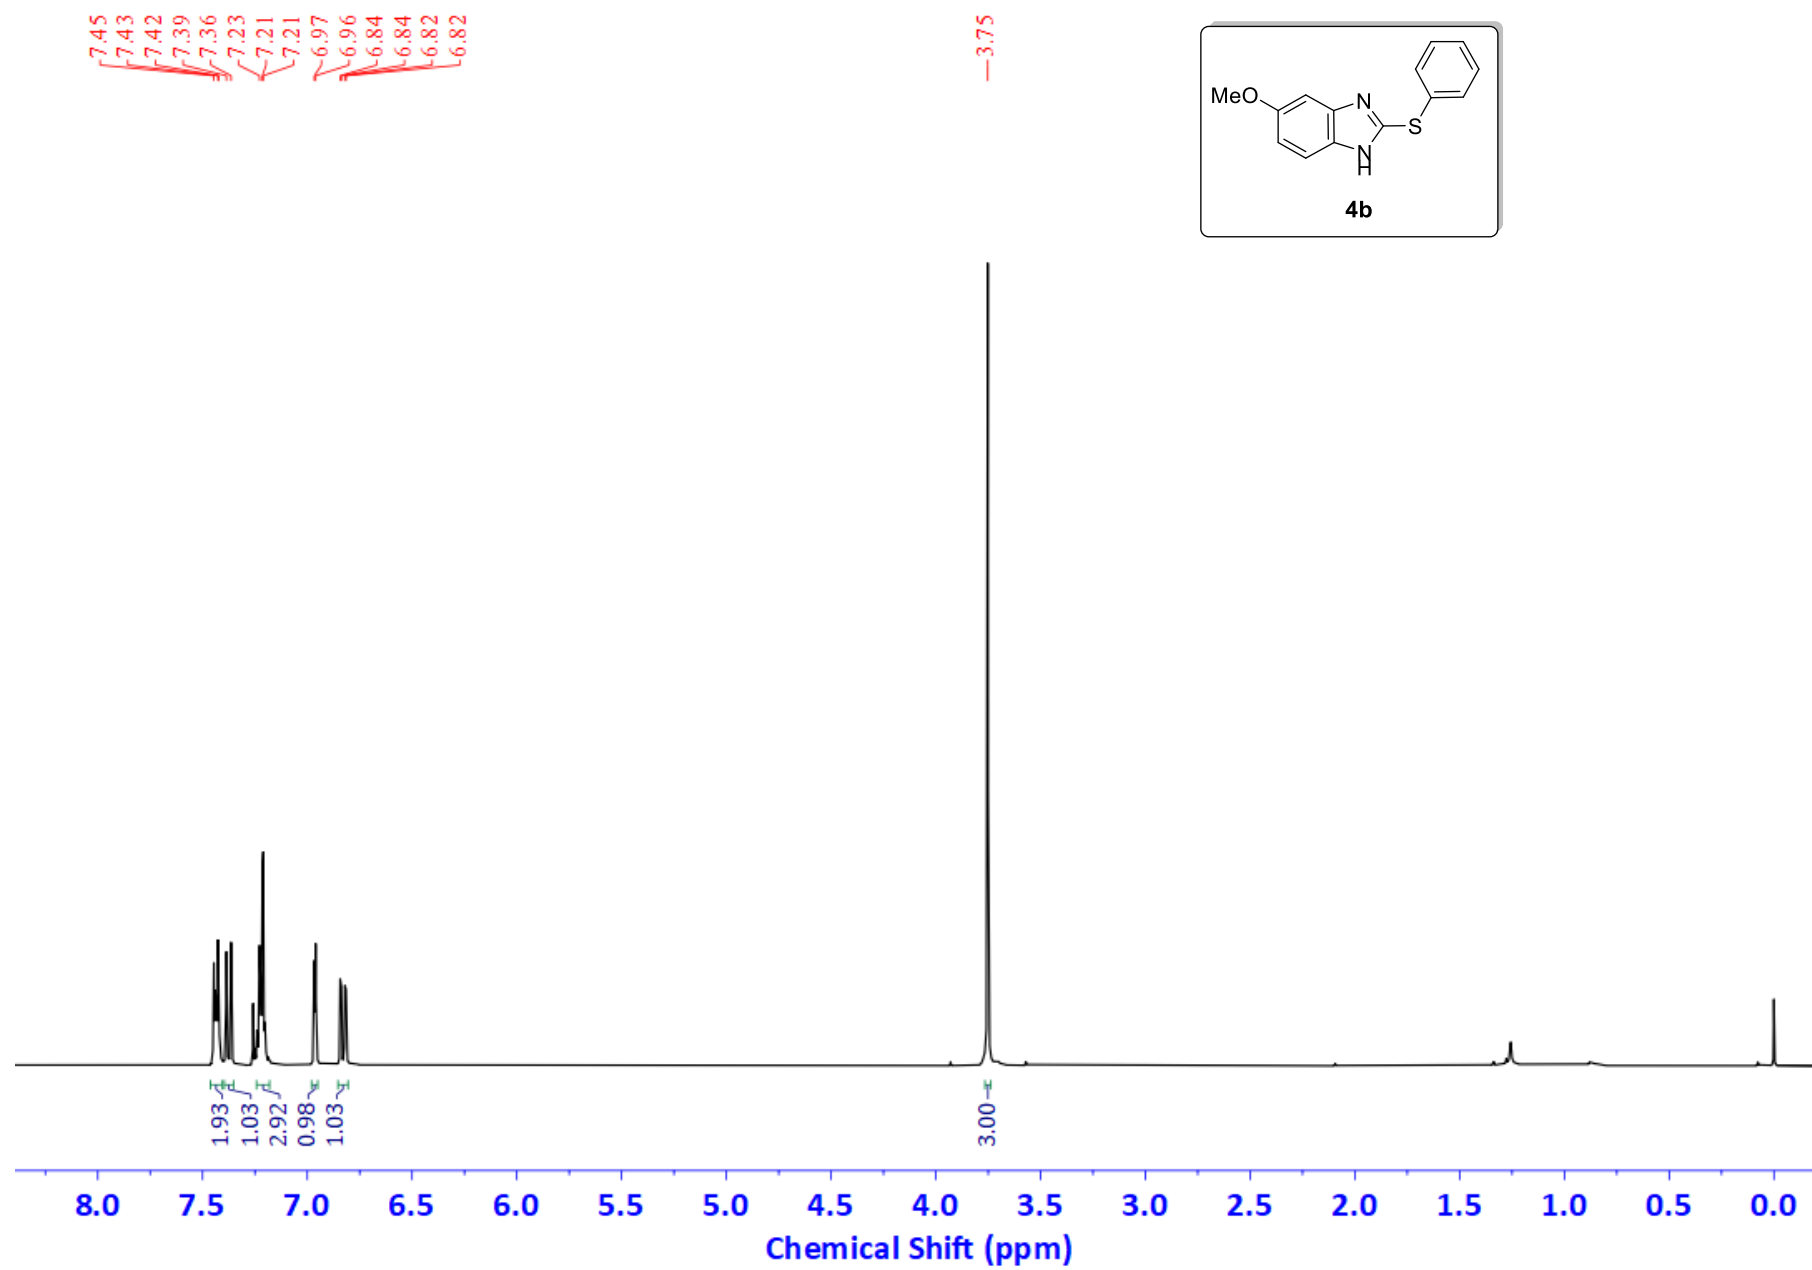

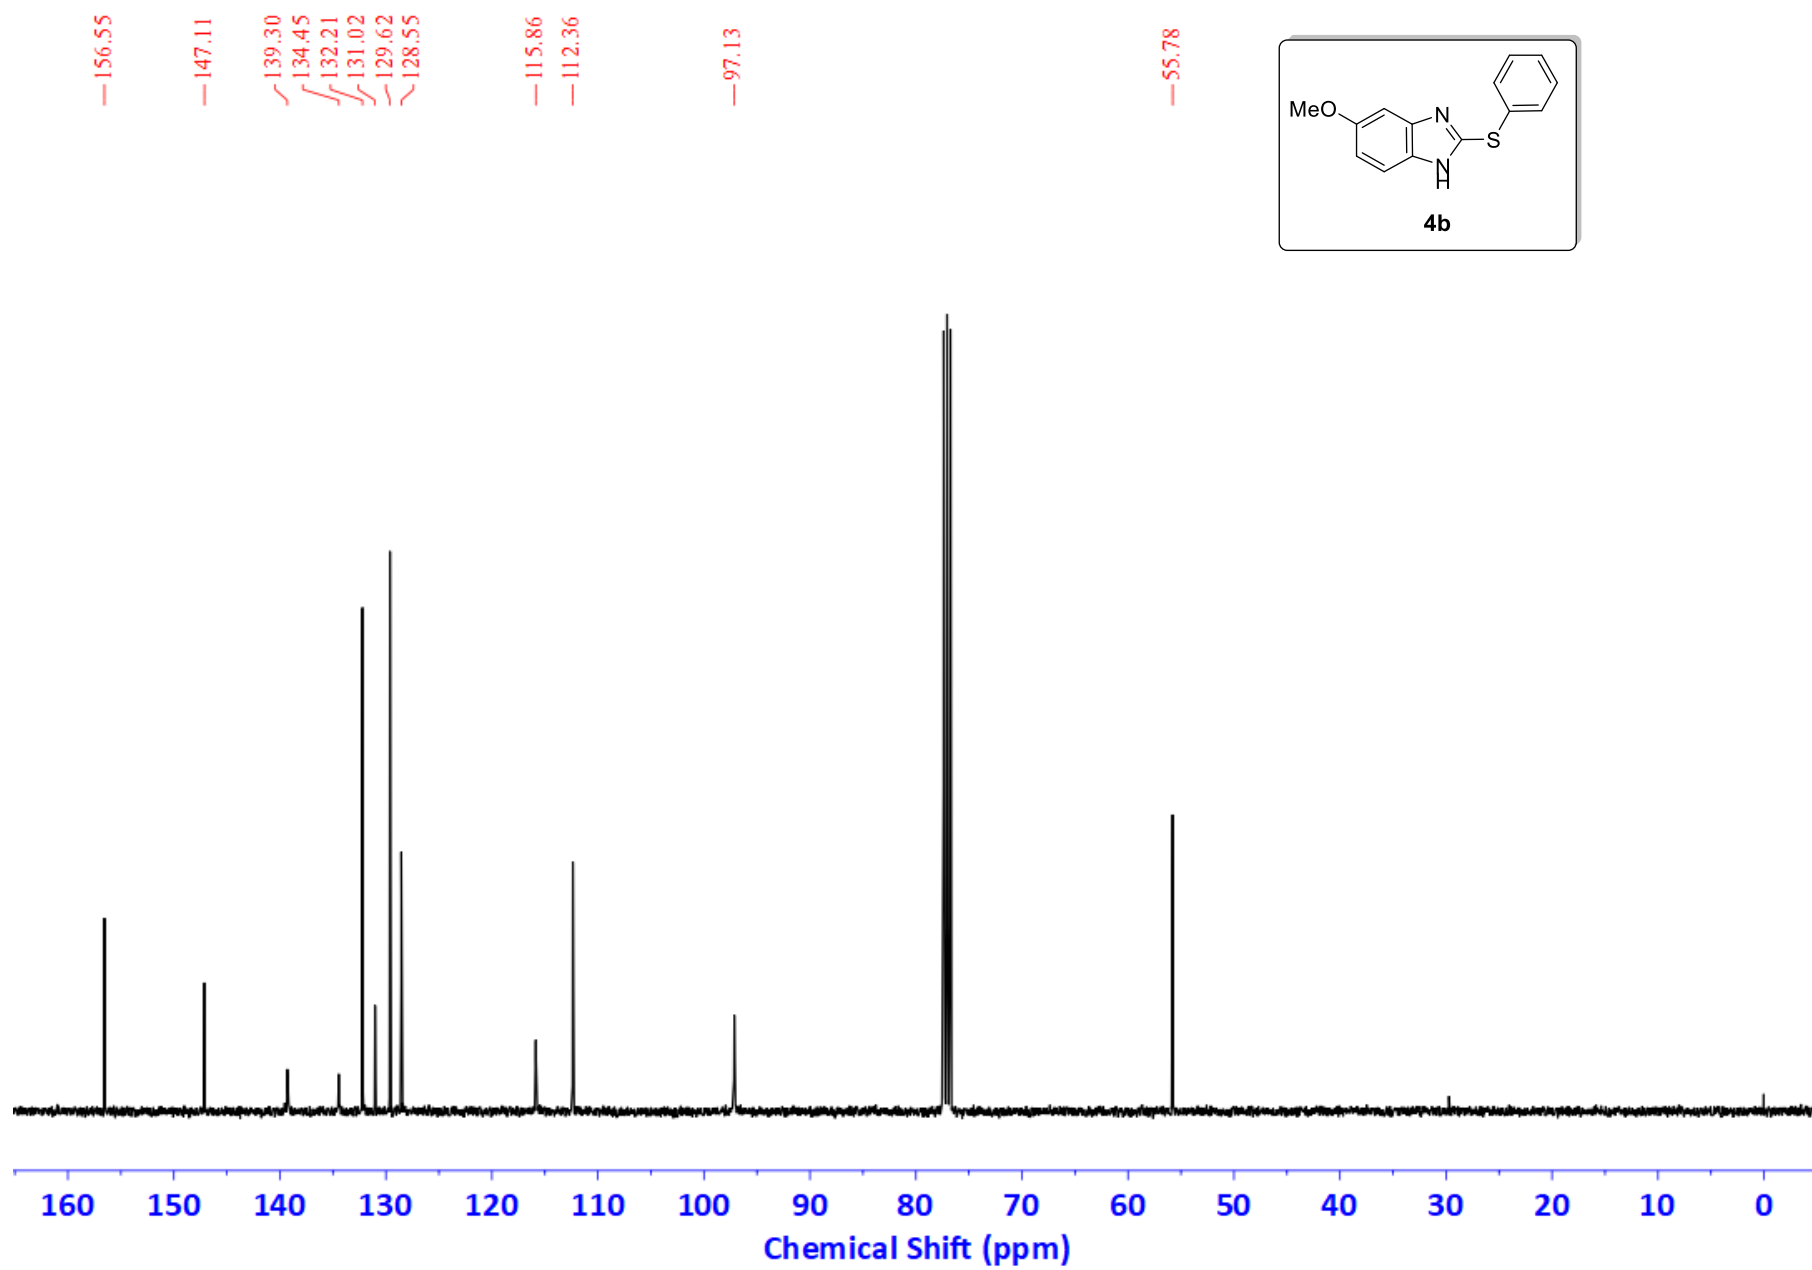

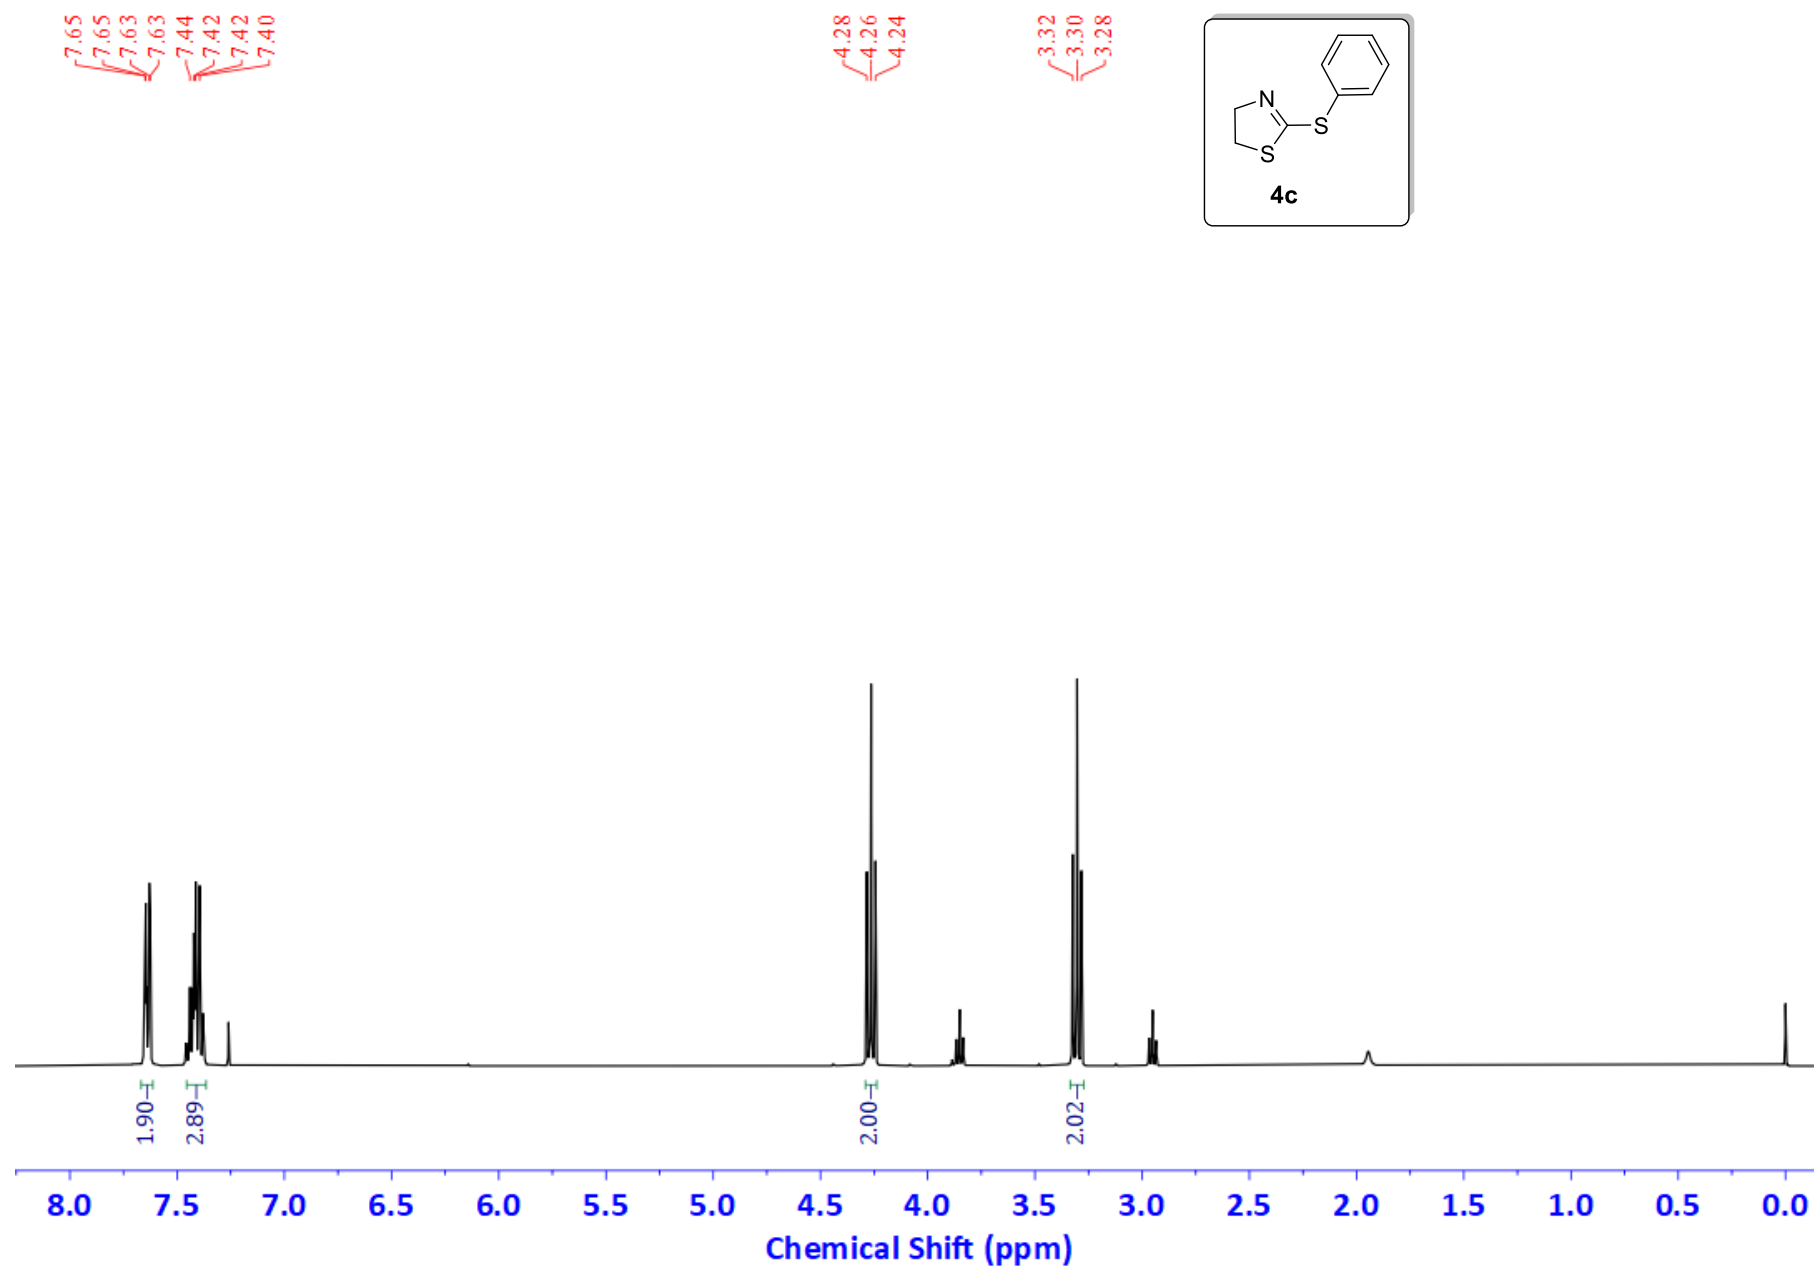

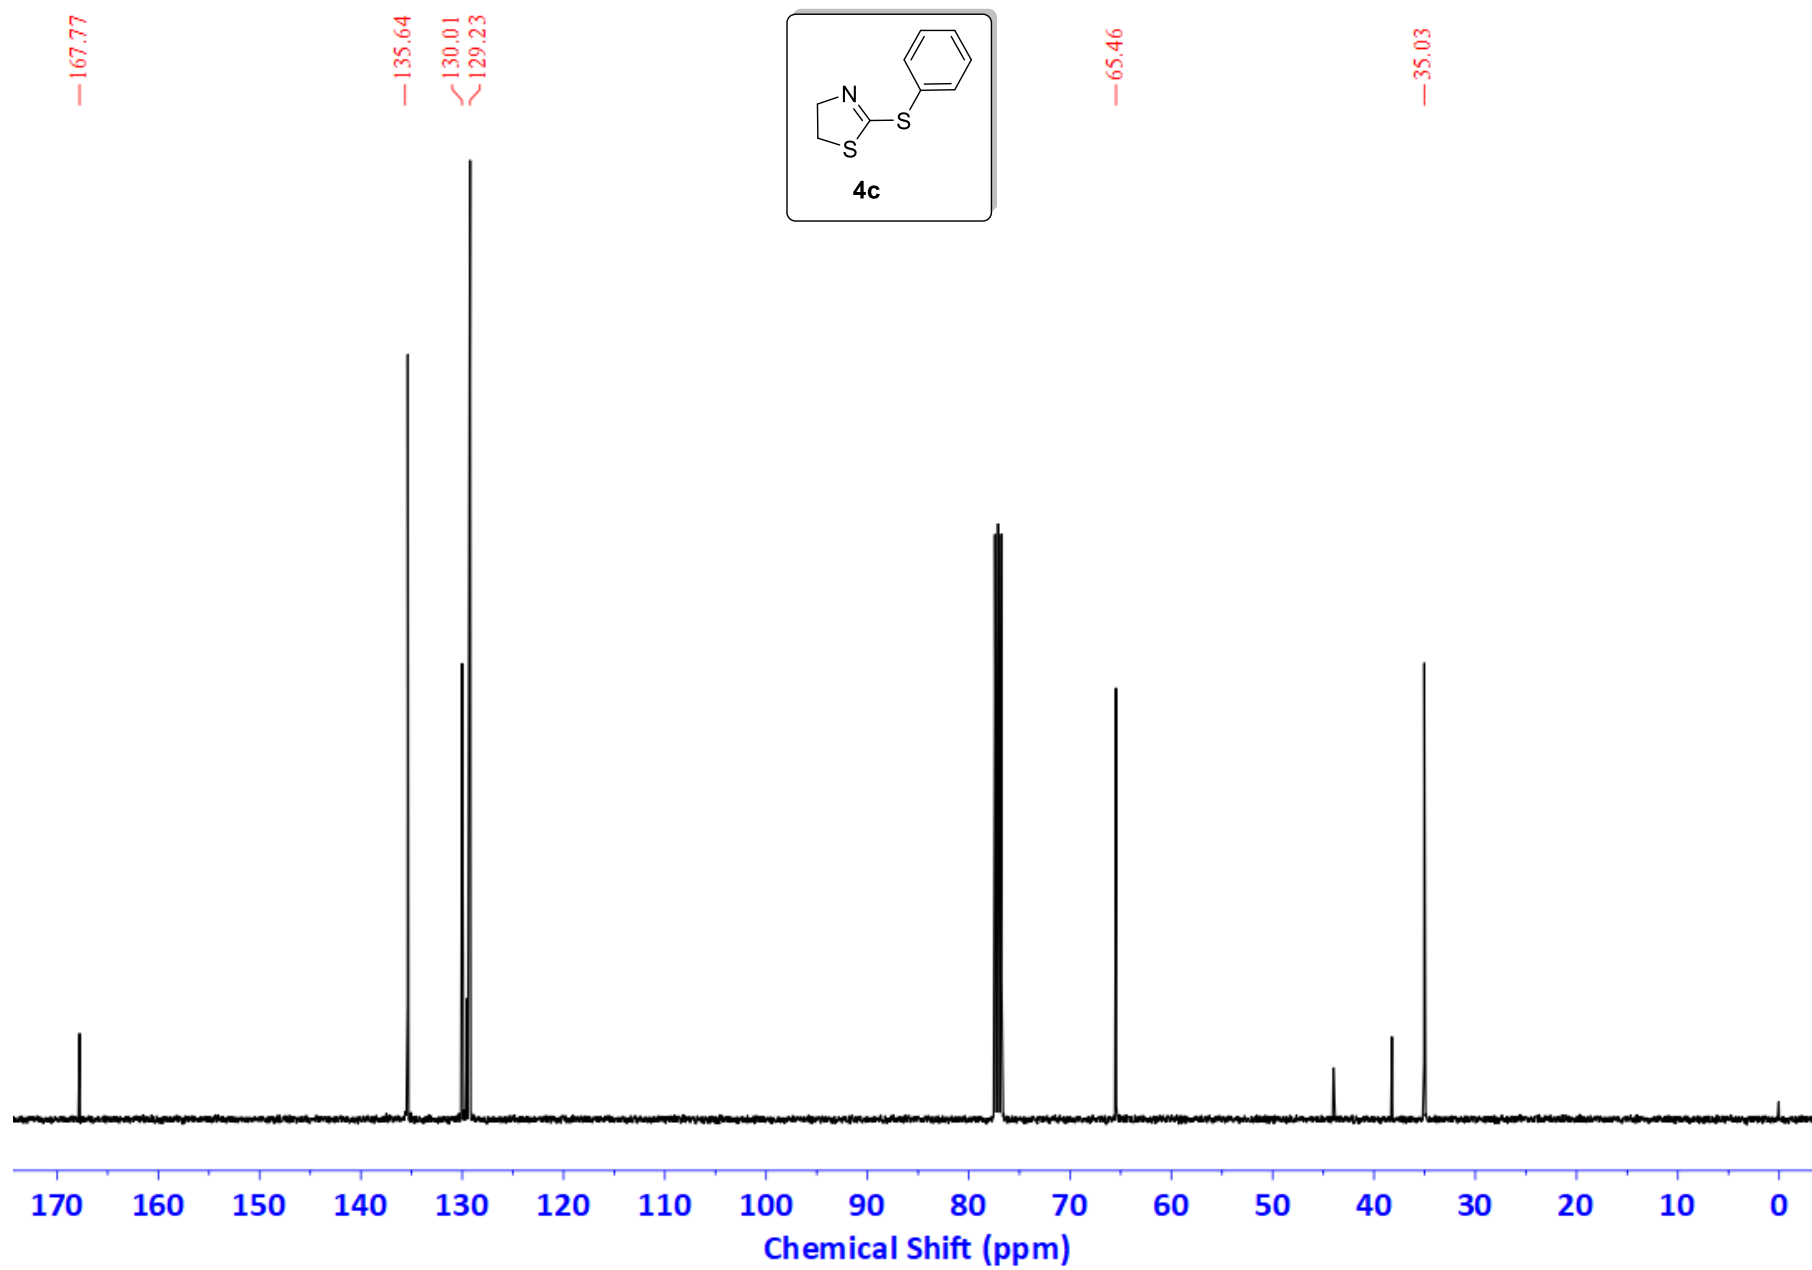

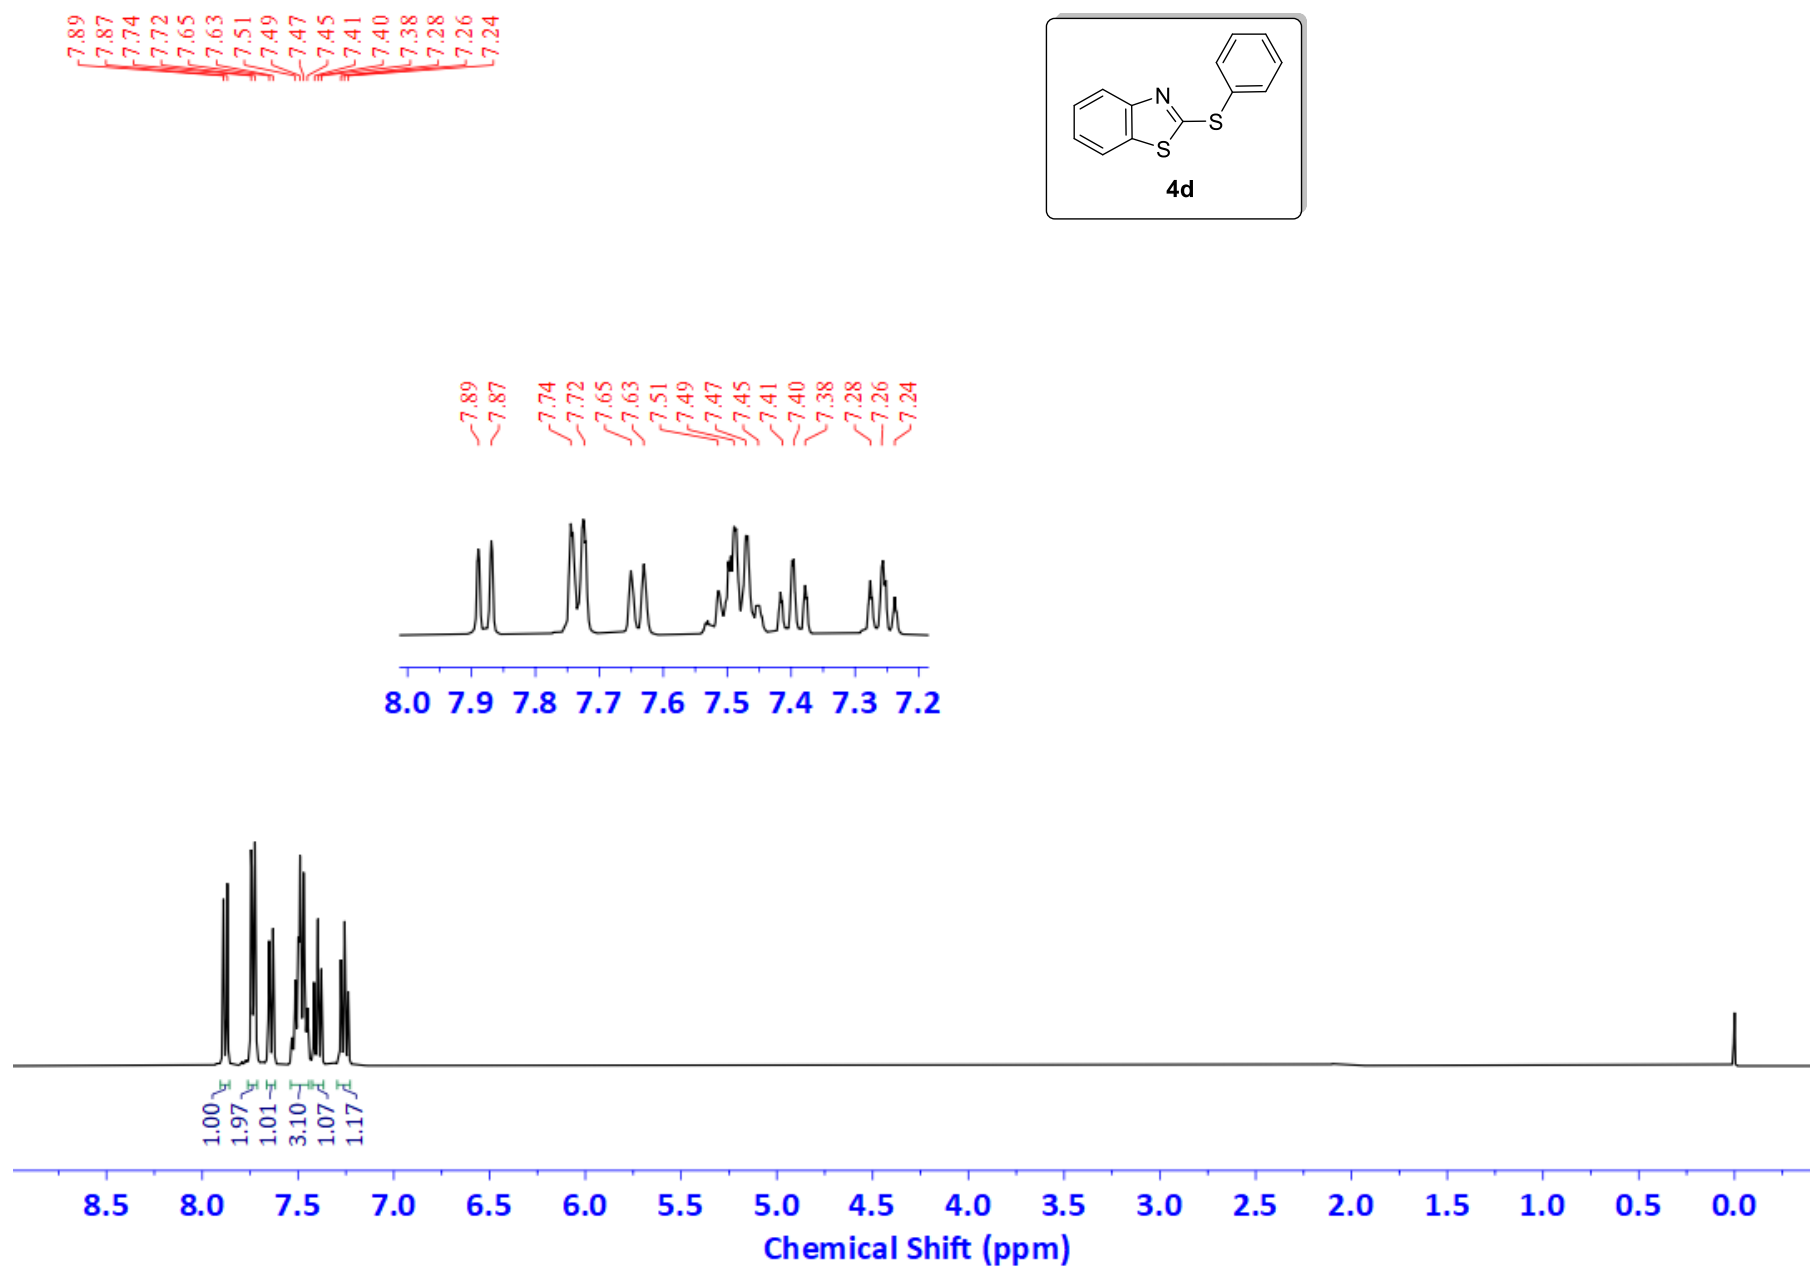

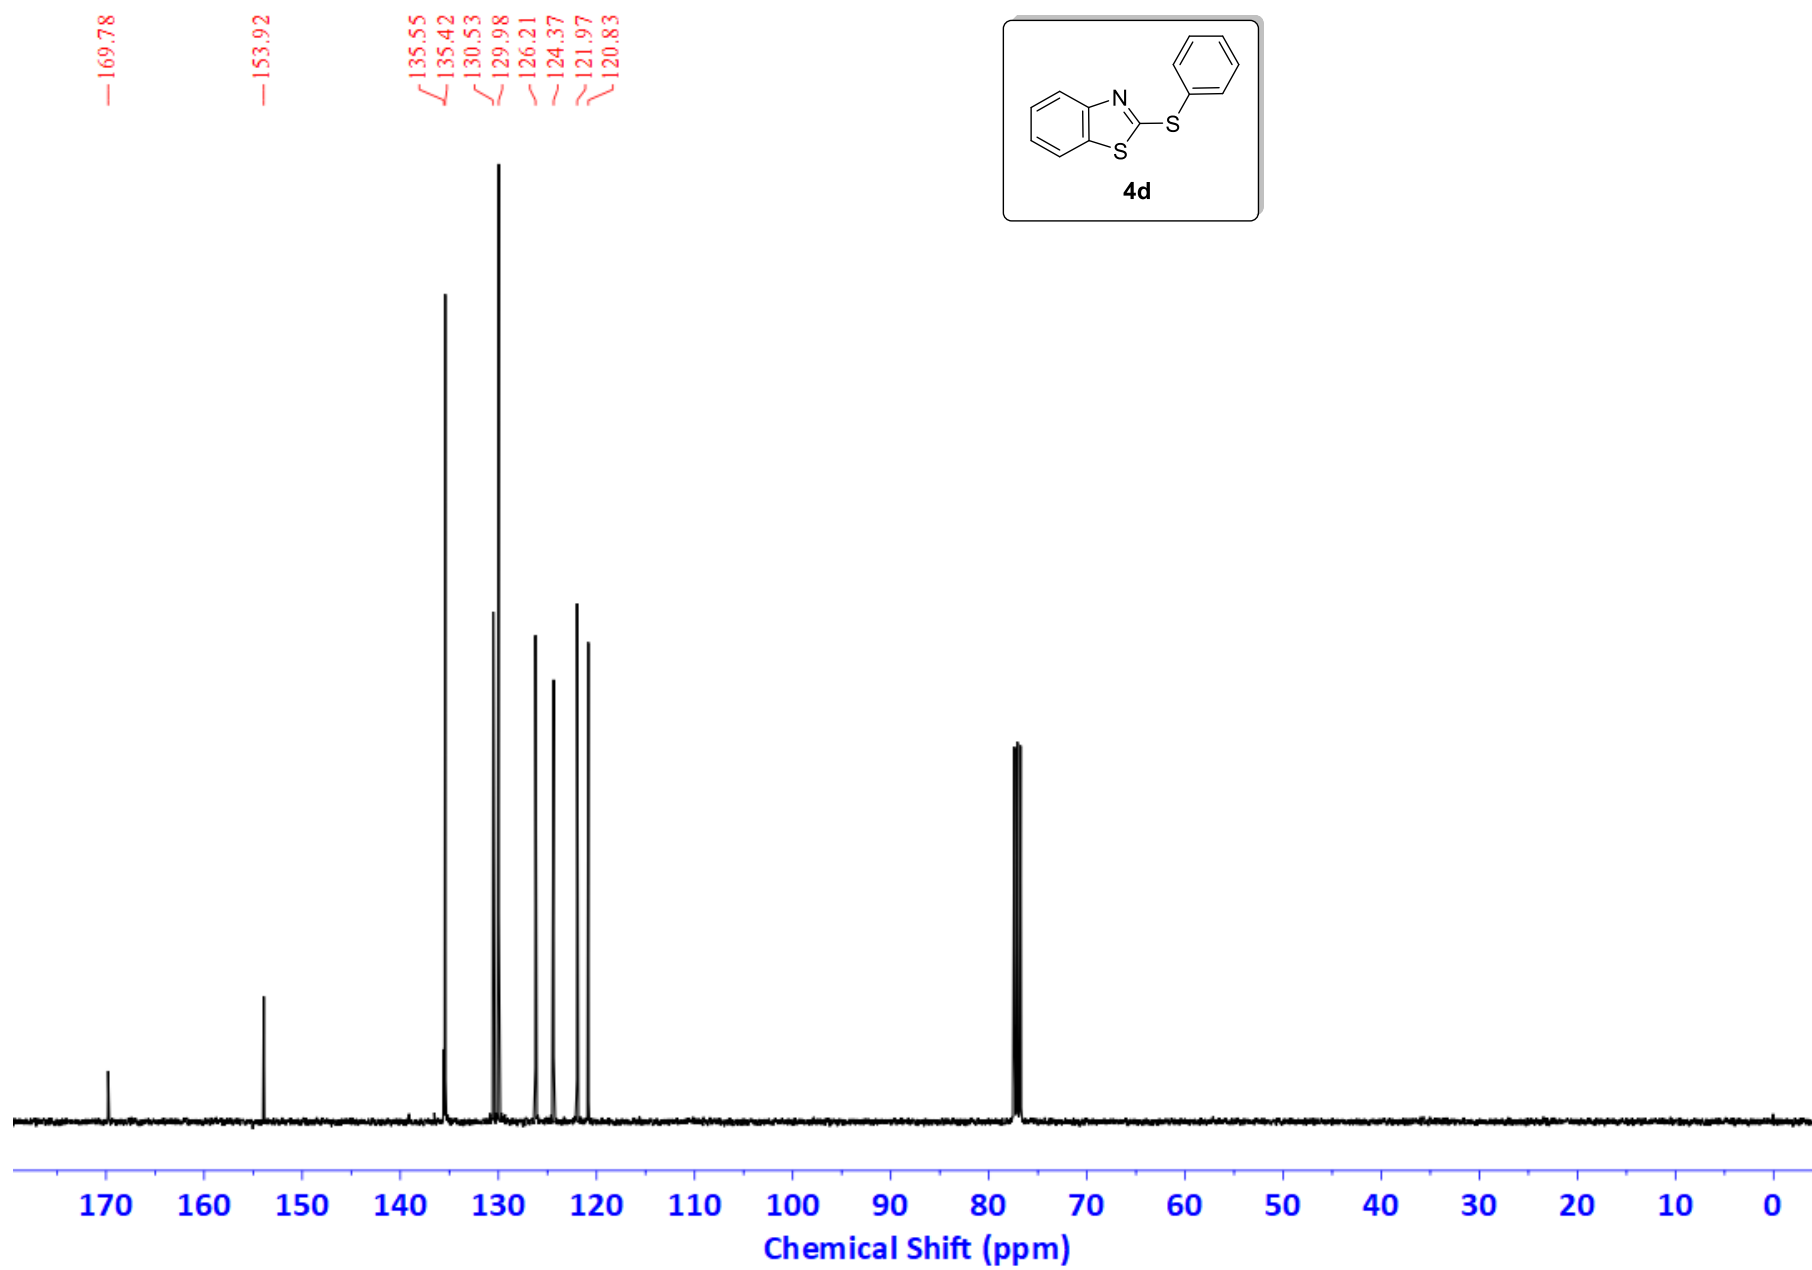

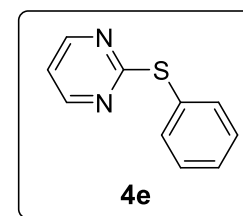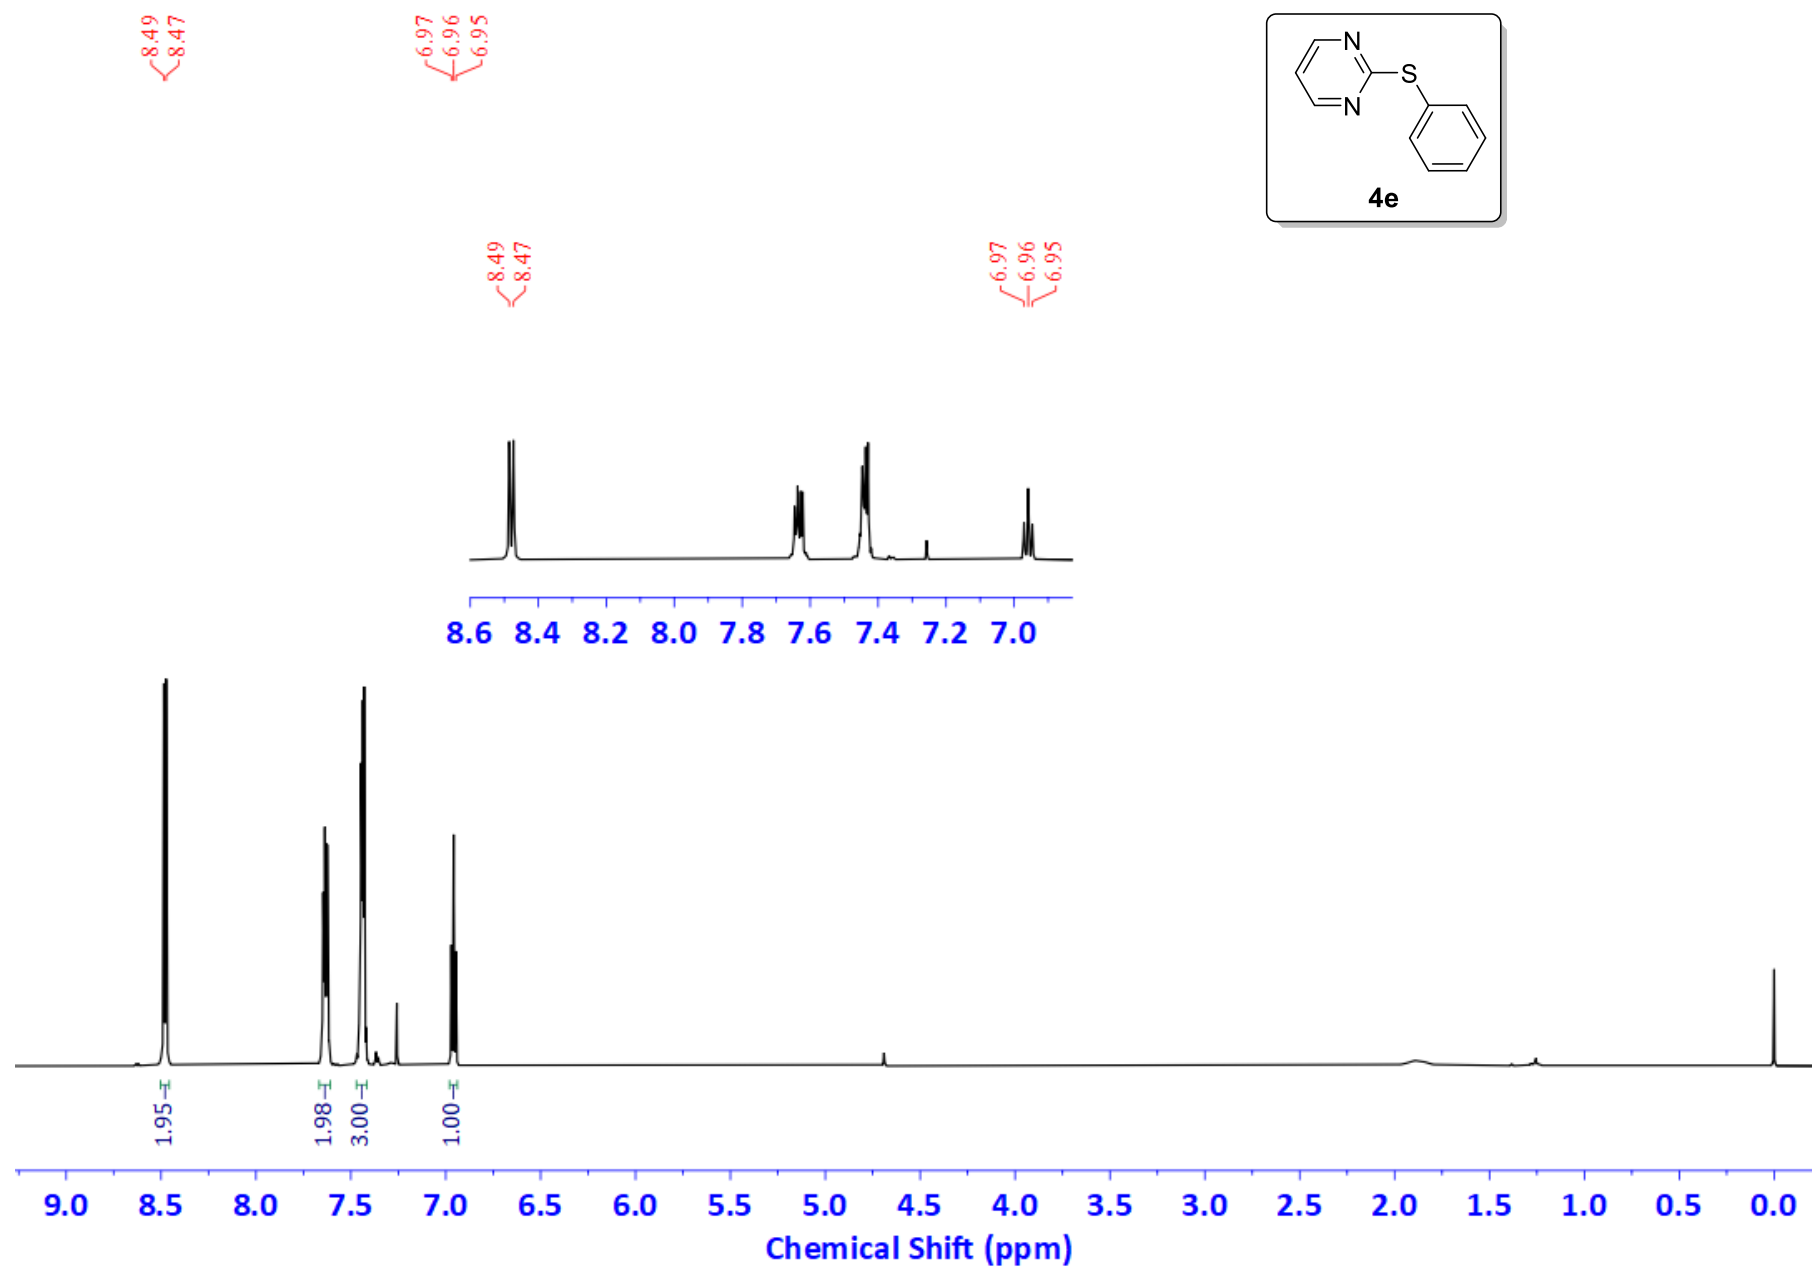

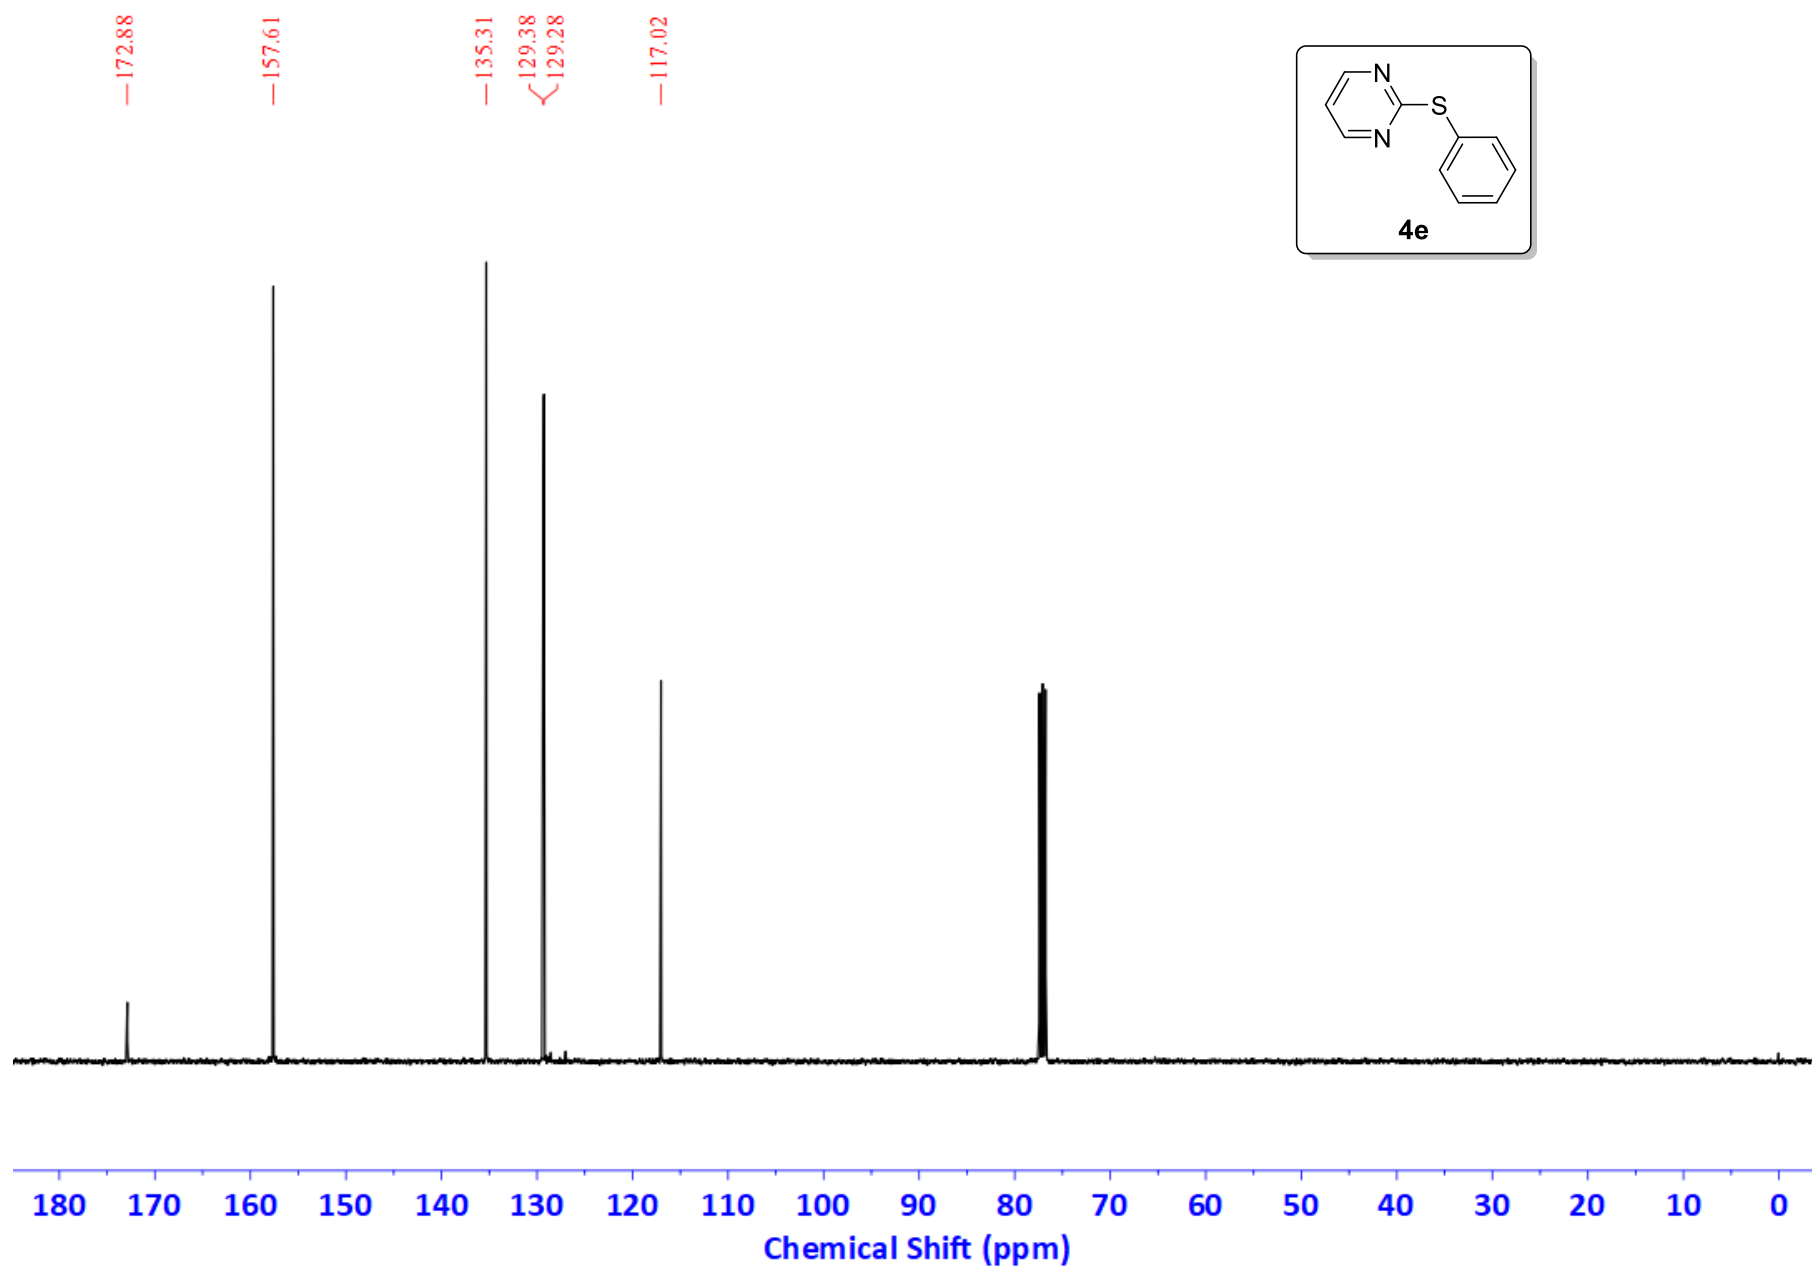



8.04  
7.53  
7.53  
7.52  
7.52  
7.37  
7.36  
7.35  
7.34

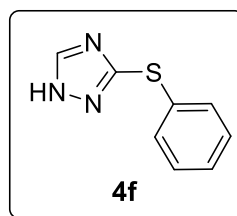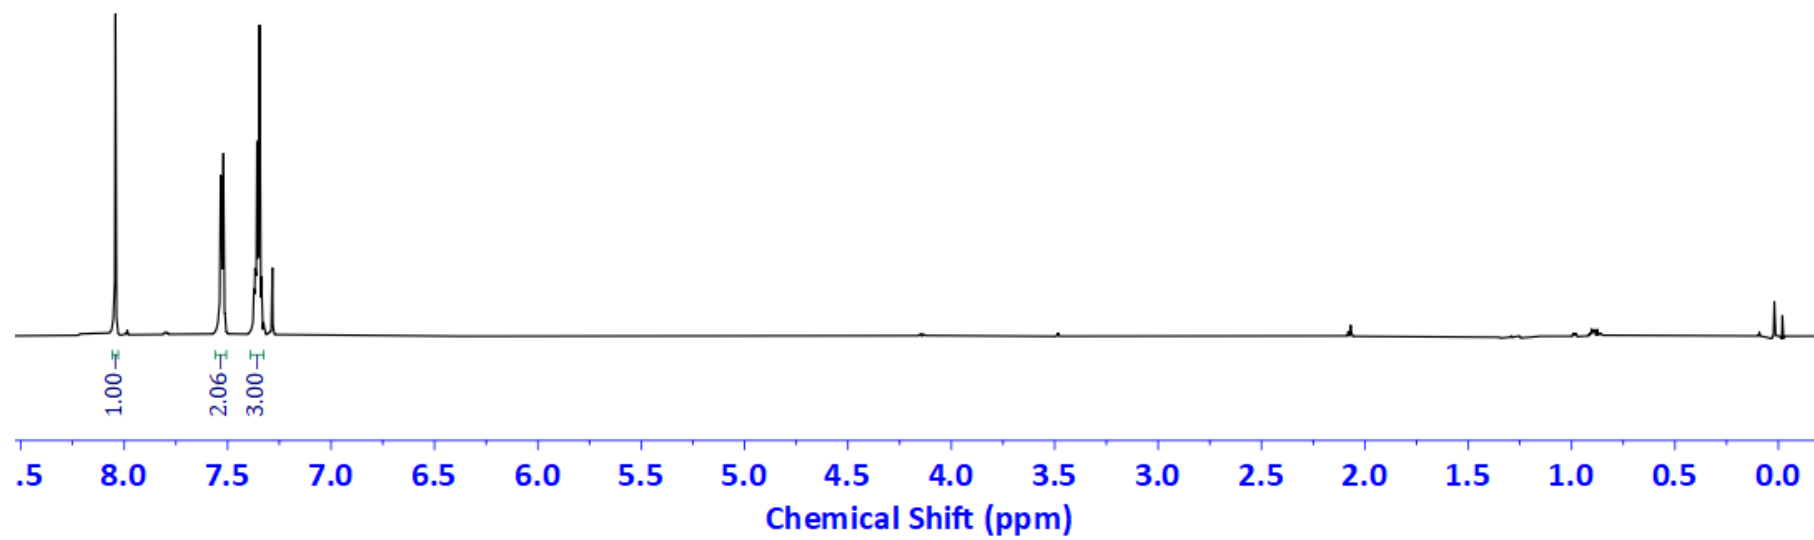

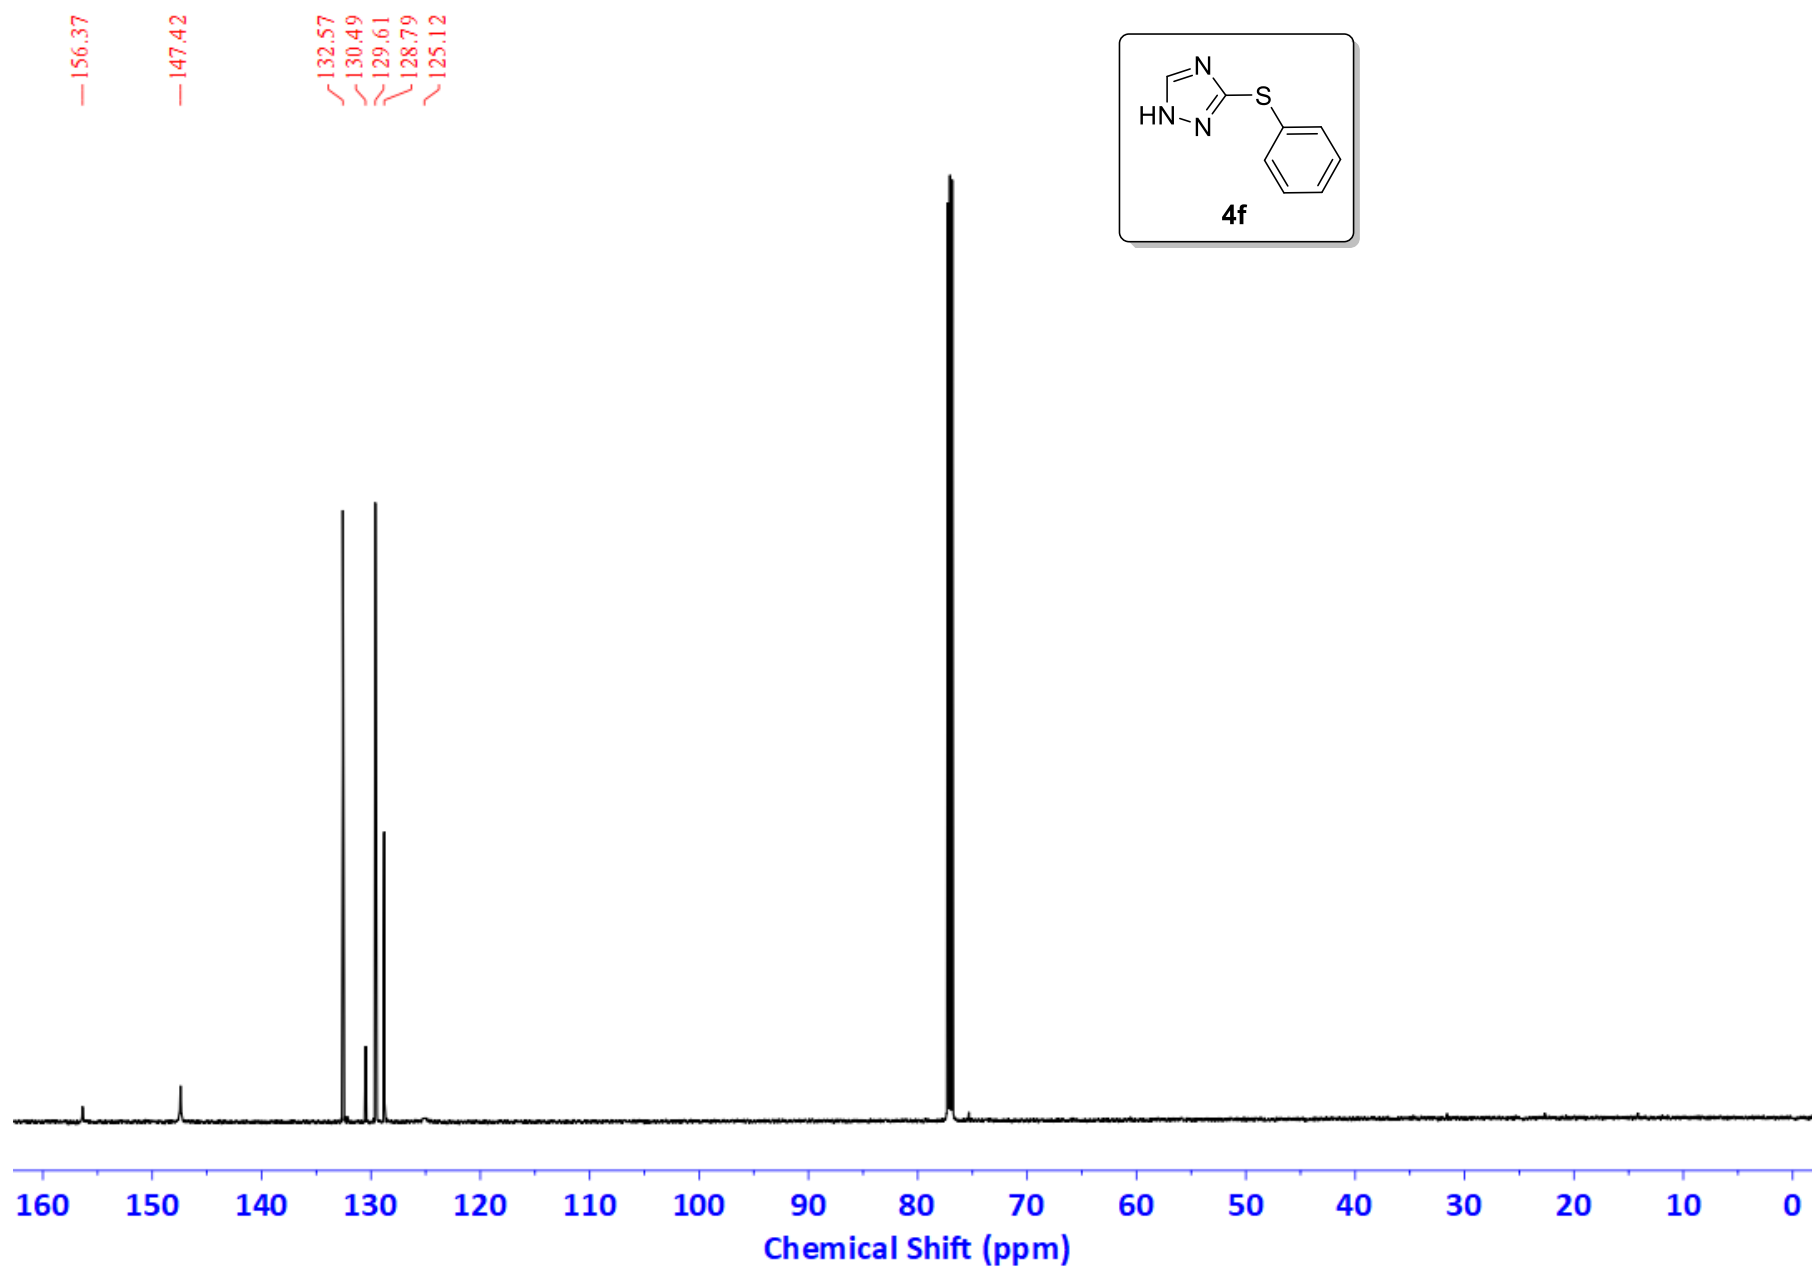

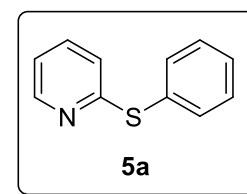

$^1\text{H}$  NMR, 400 MHz,  $\text{CDCl}_3$

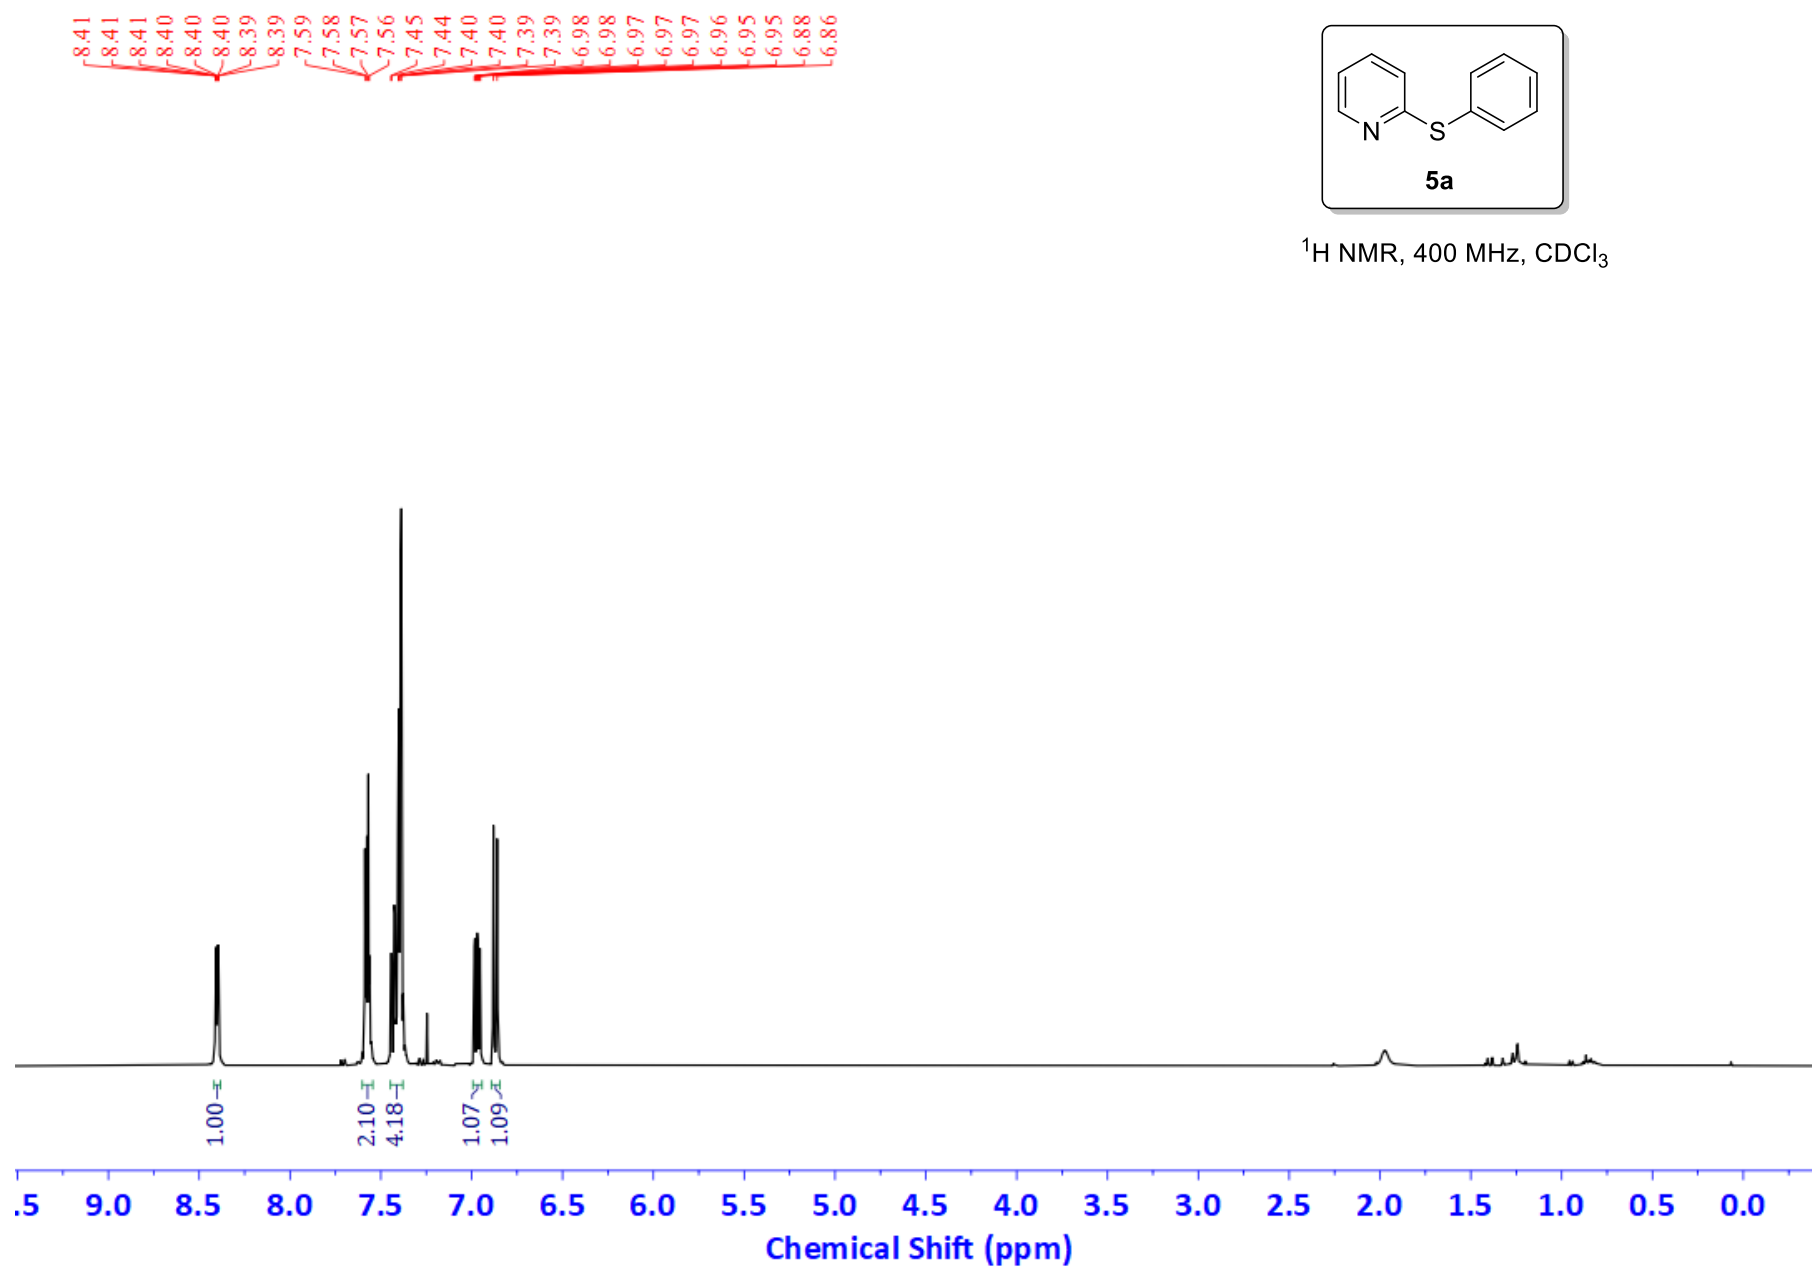

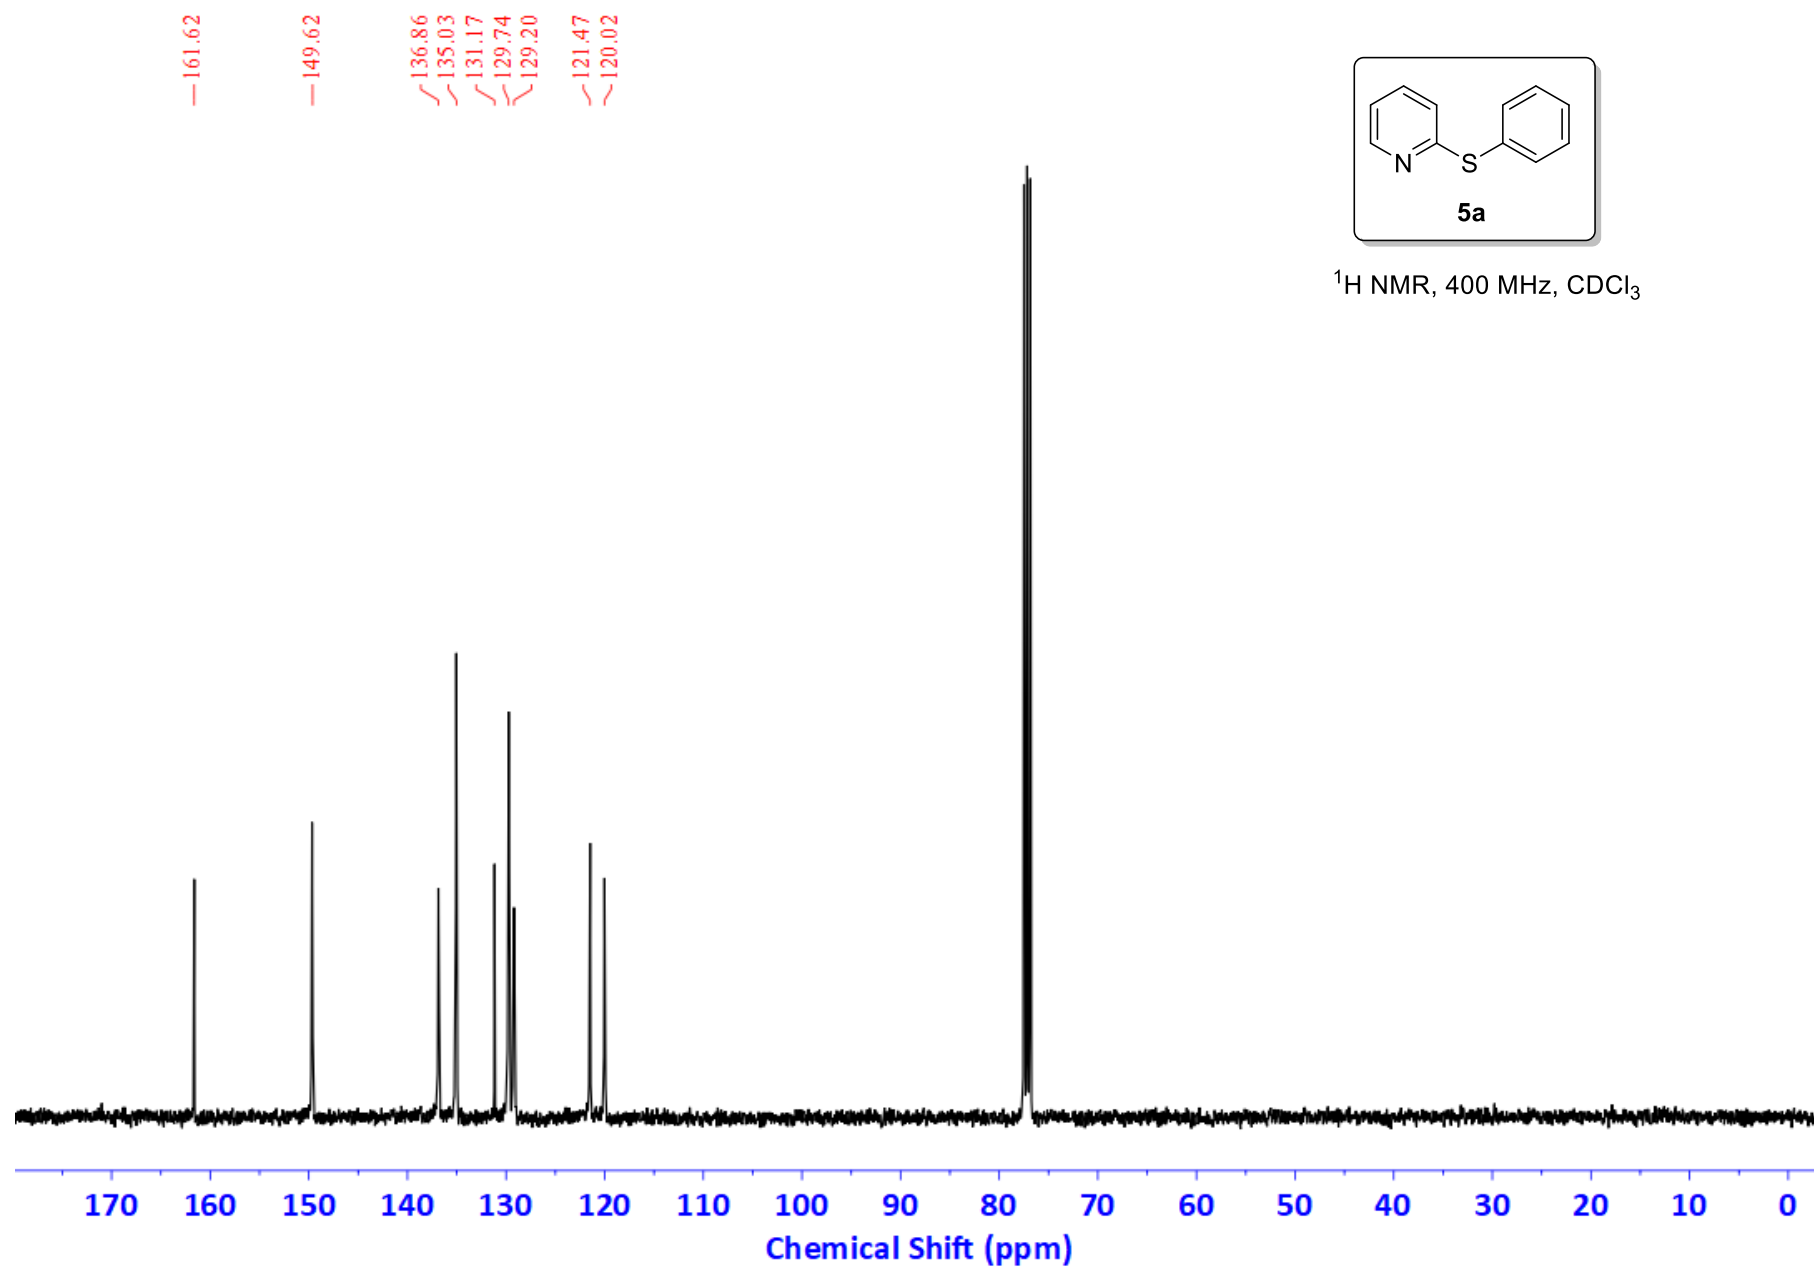

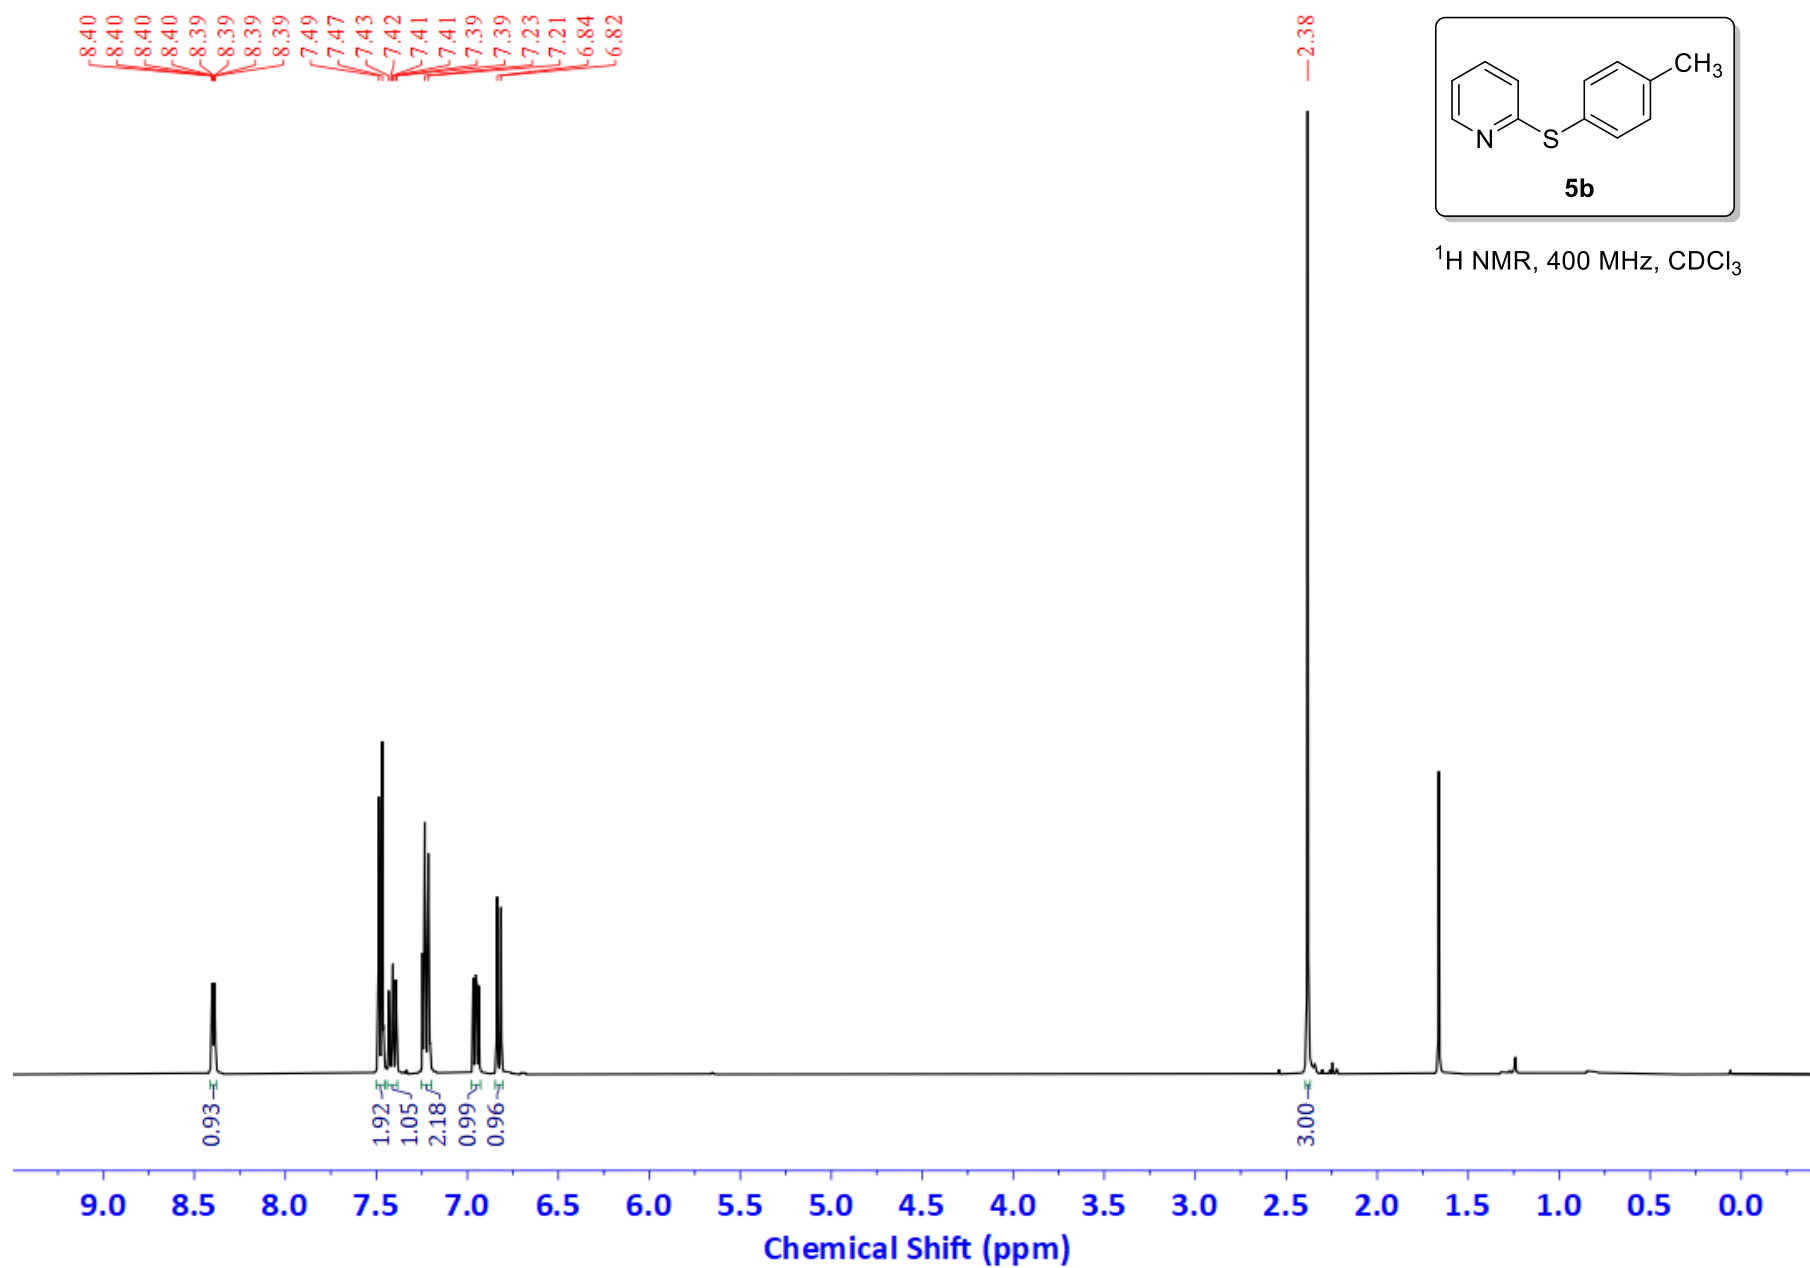

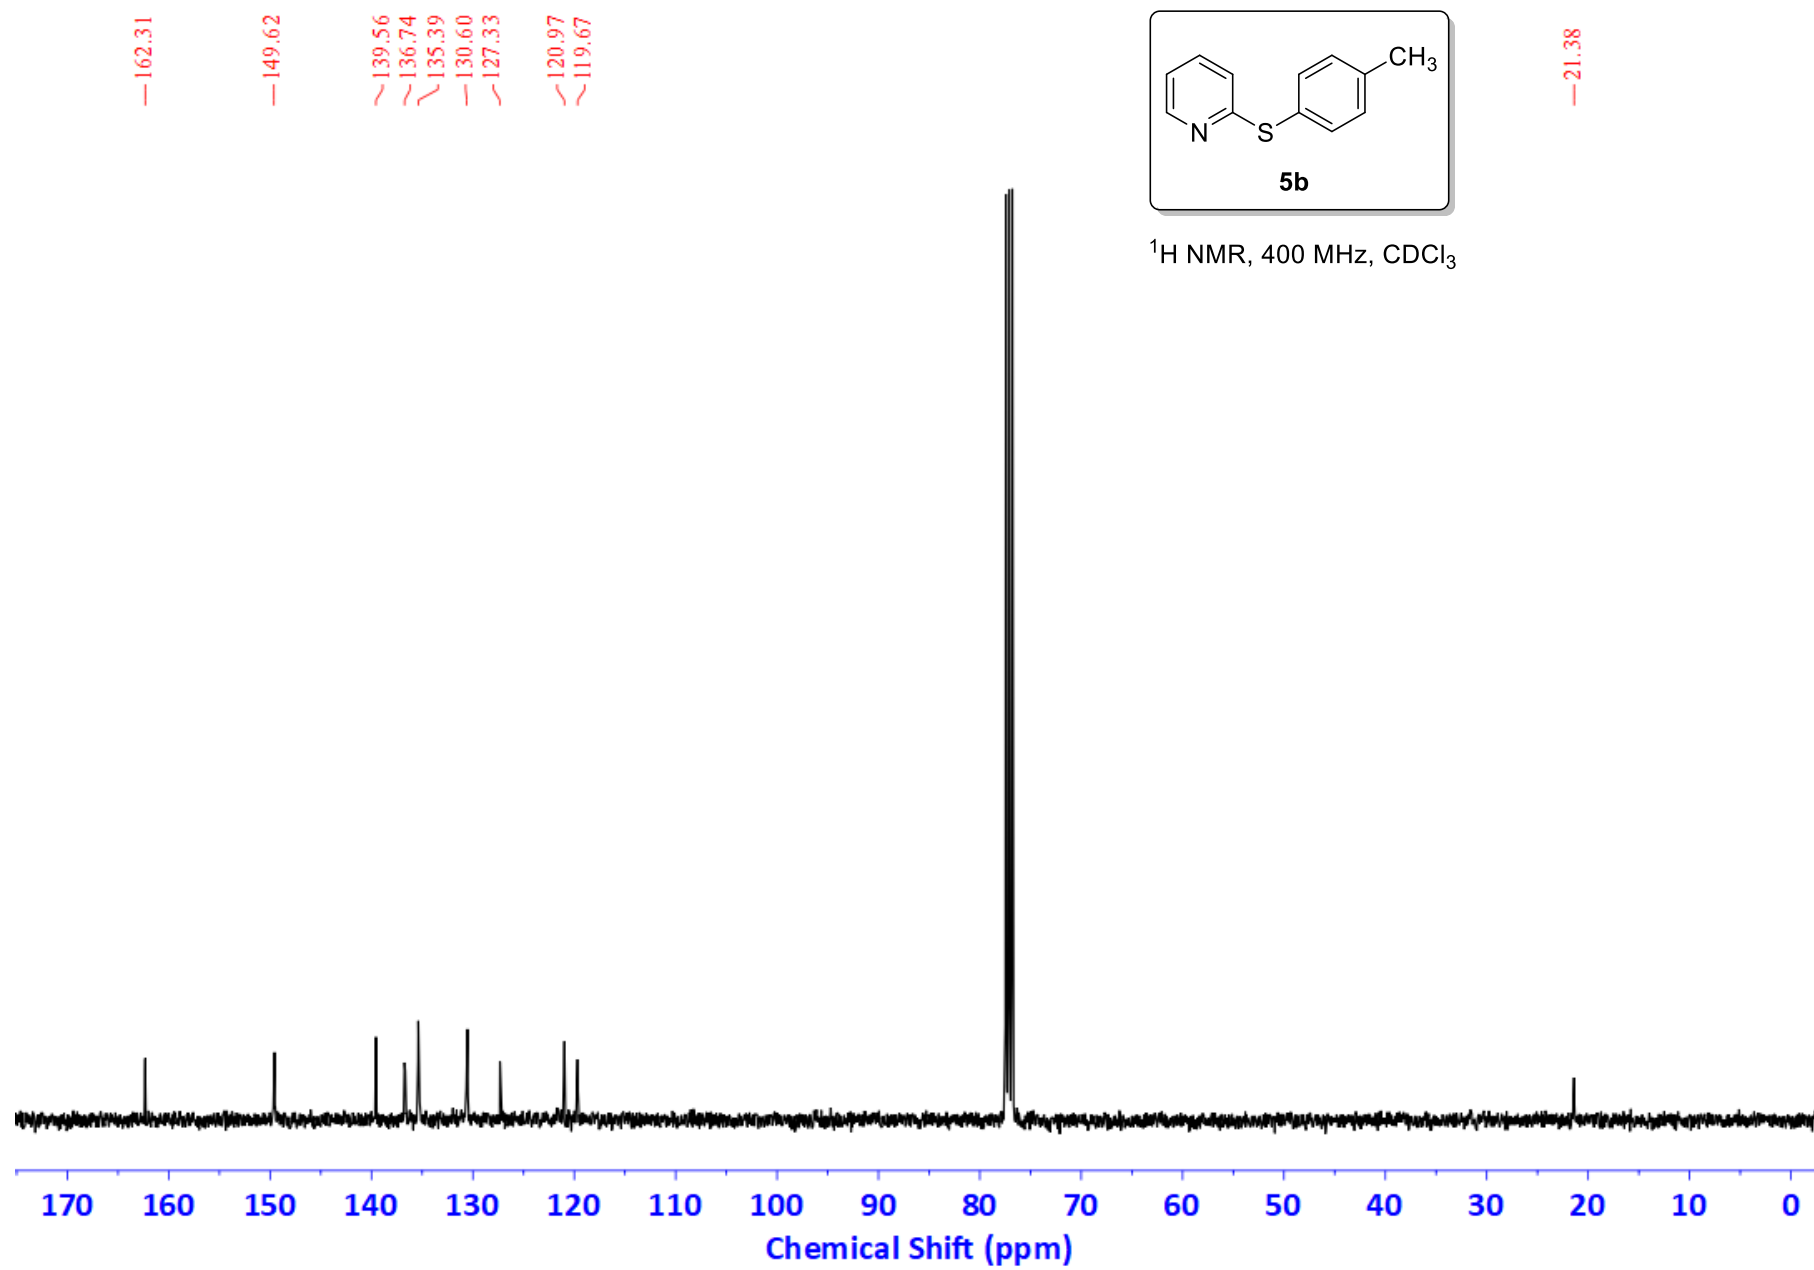

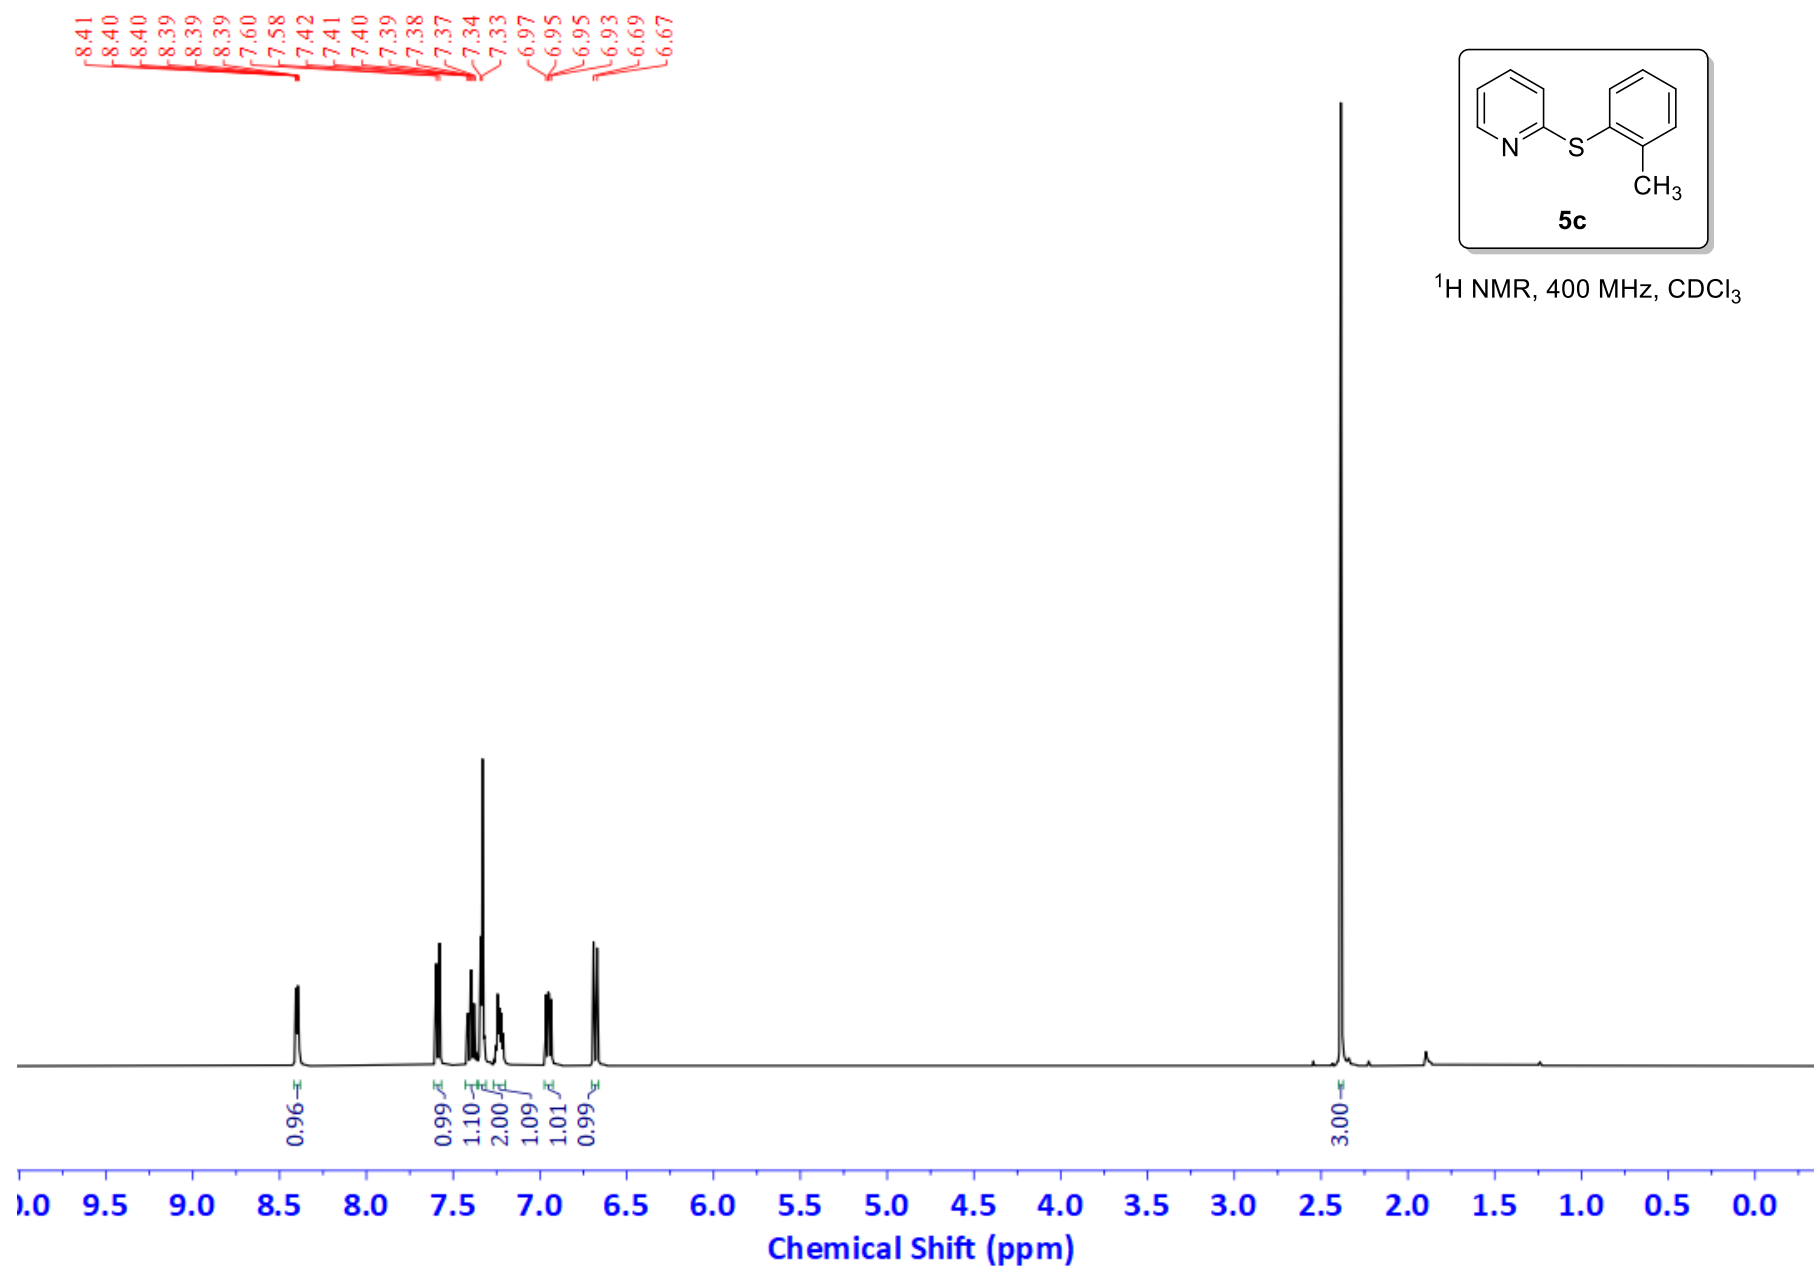

— 161.37  
— 149.76  
— 142.86  
— 136.81  
~ 131.13  
~ 129.97  
~ 127.22  
~ 120.48  
~ 119.63

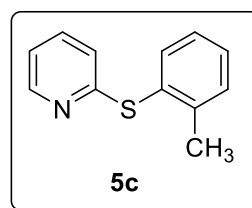

— 20.98

$^1\text{H}$  NMR, 400 MHz,  $\text{CDCl}_3$

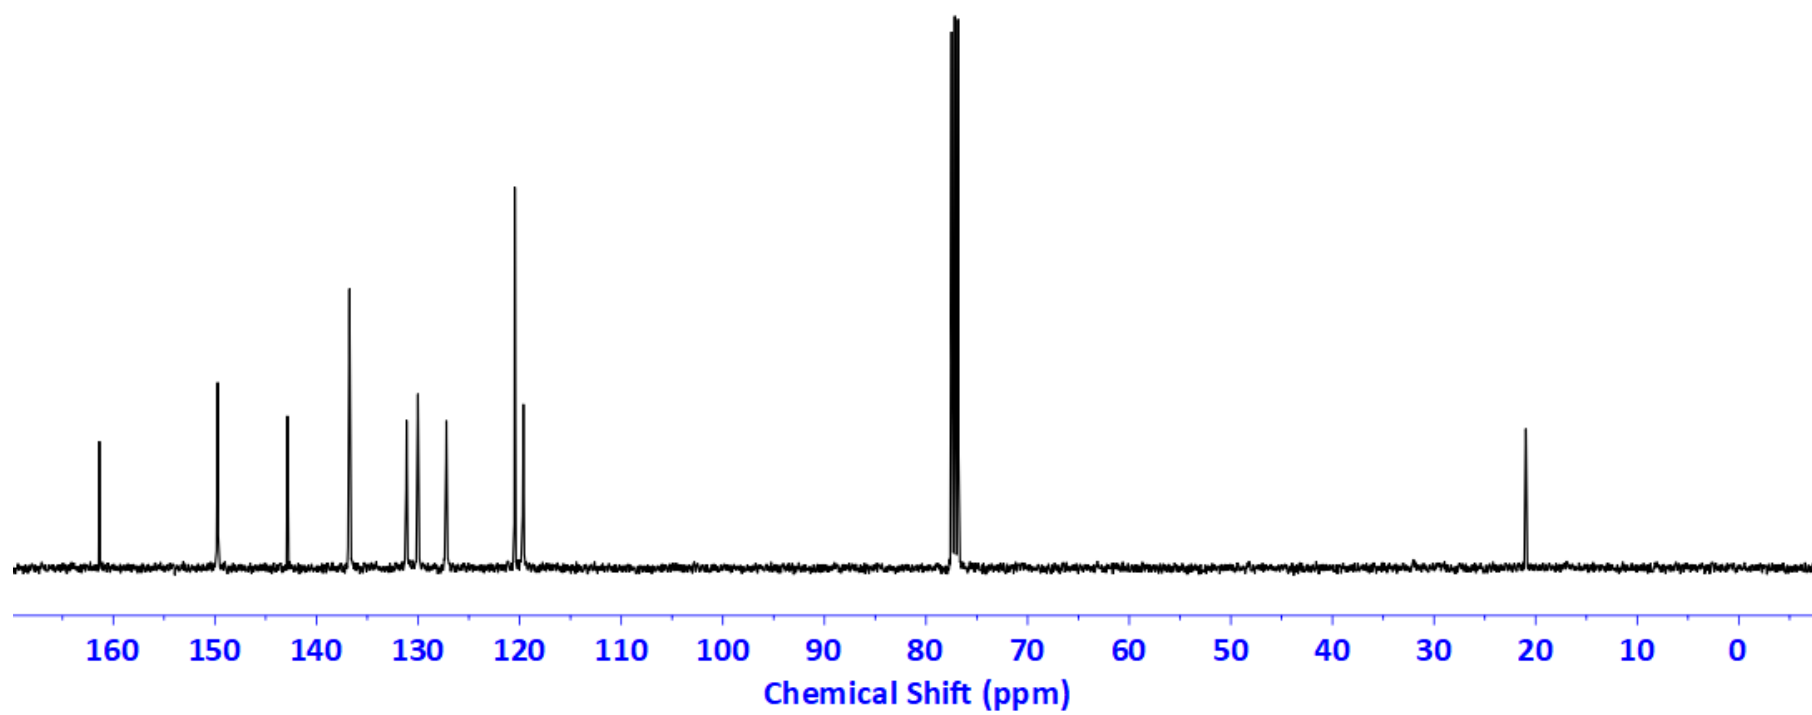



8.42  
8.42  
8.41  
8.41  
8.41  
8.40  
8.40  
7.54  
7.51  
7.49  
7.49  
7.47  
7.47  
7.44  
7.42  
7.03  
7.02  
7.01  
7.00  
7.00  
6.95  
6.93

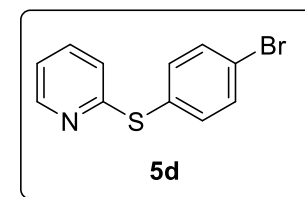

$^1\text{H}$  NMR, 400 MHz,  $\text{CDCl}_3$

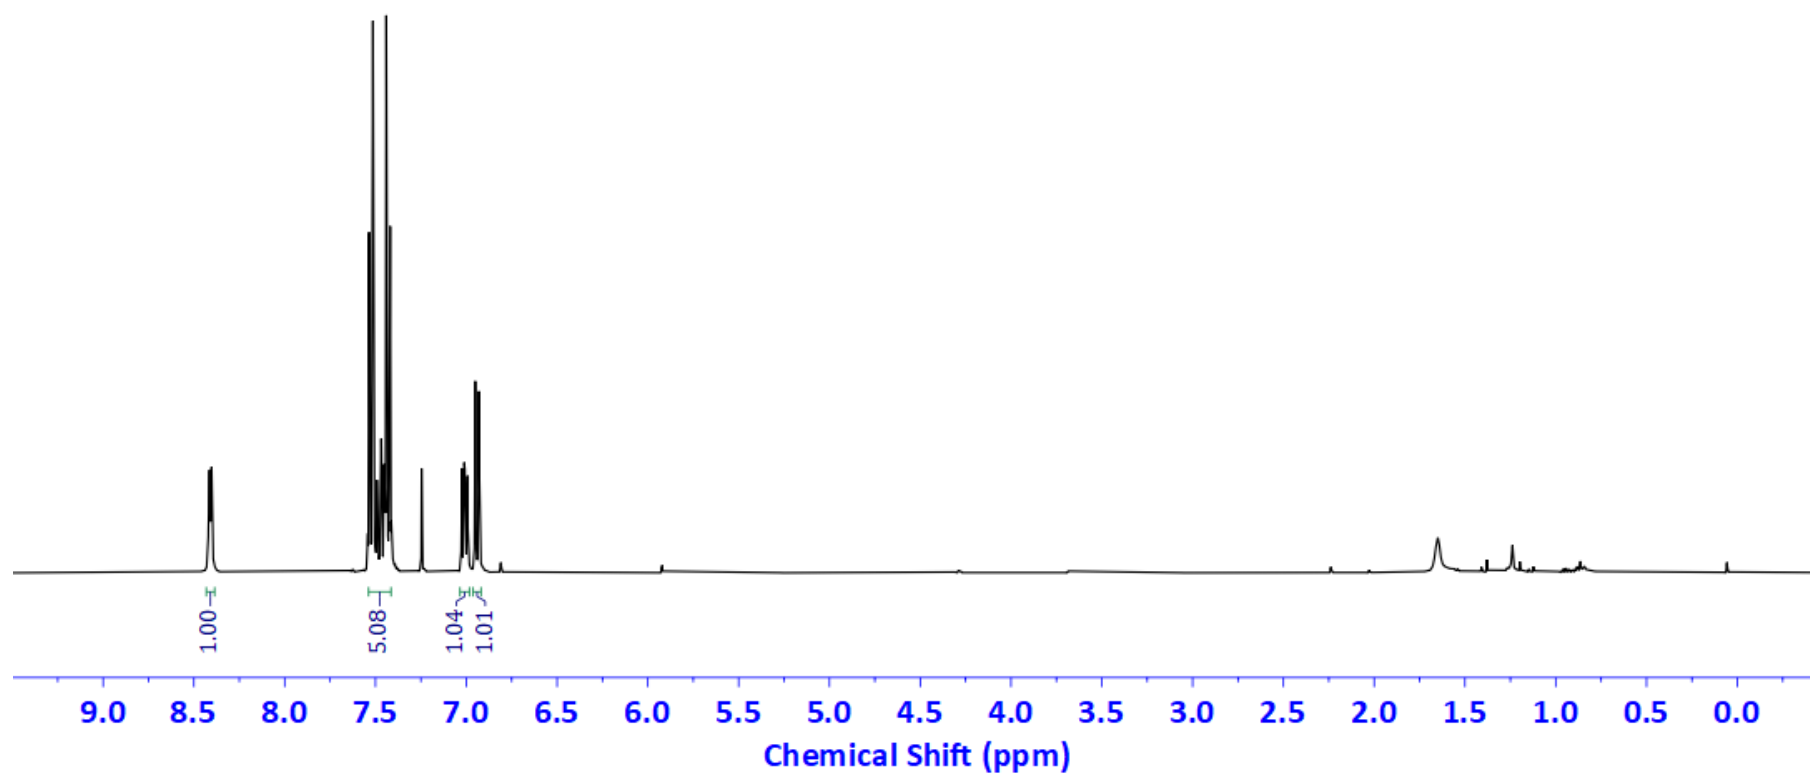

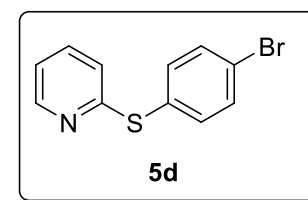

$^1\text{H}$  NMR, 400 MHz,  $\text{CDCl}_3$

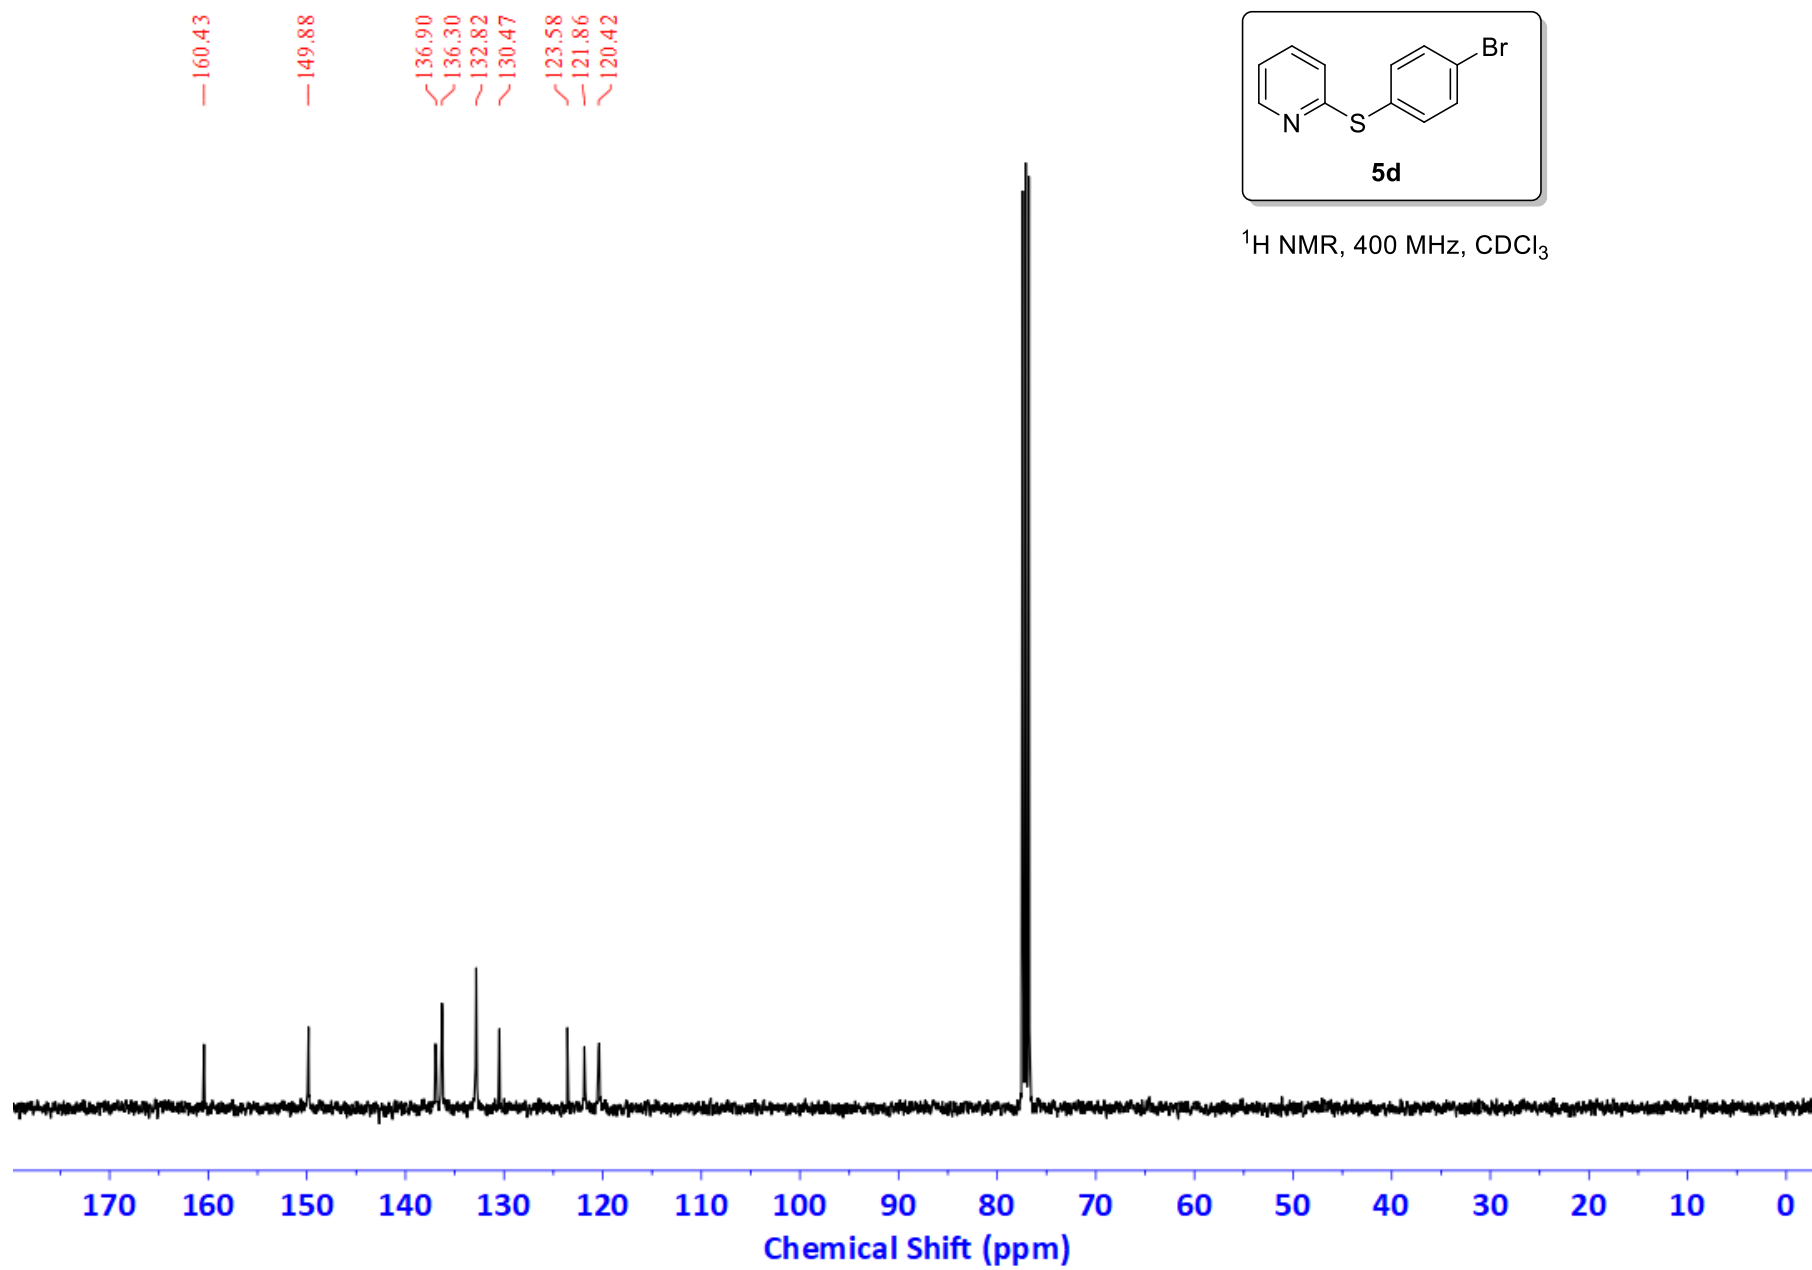

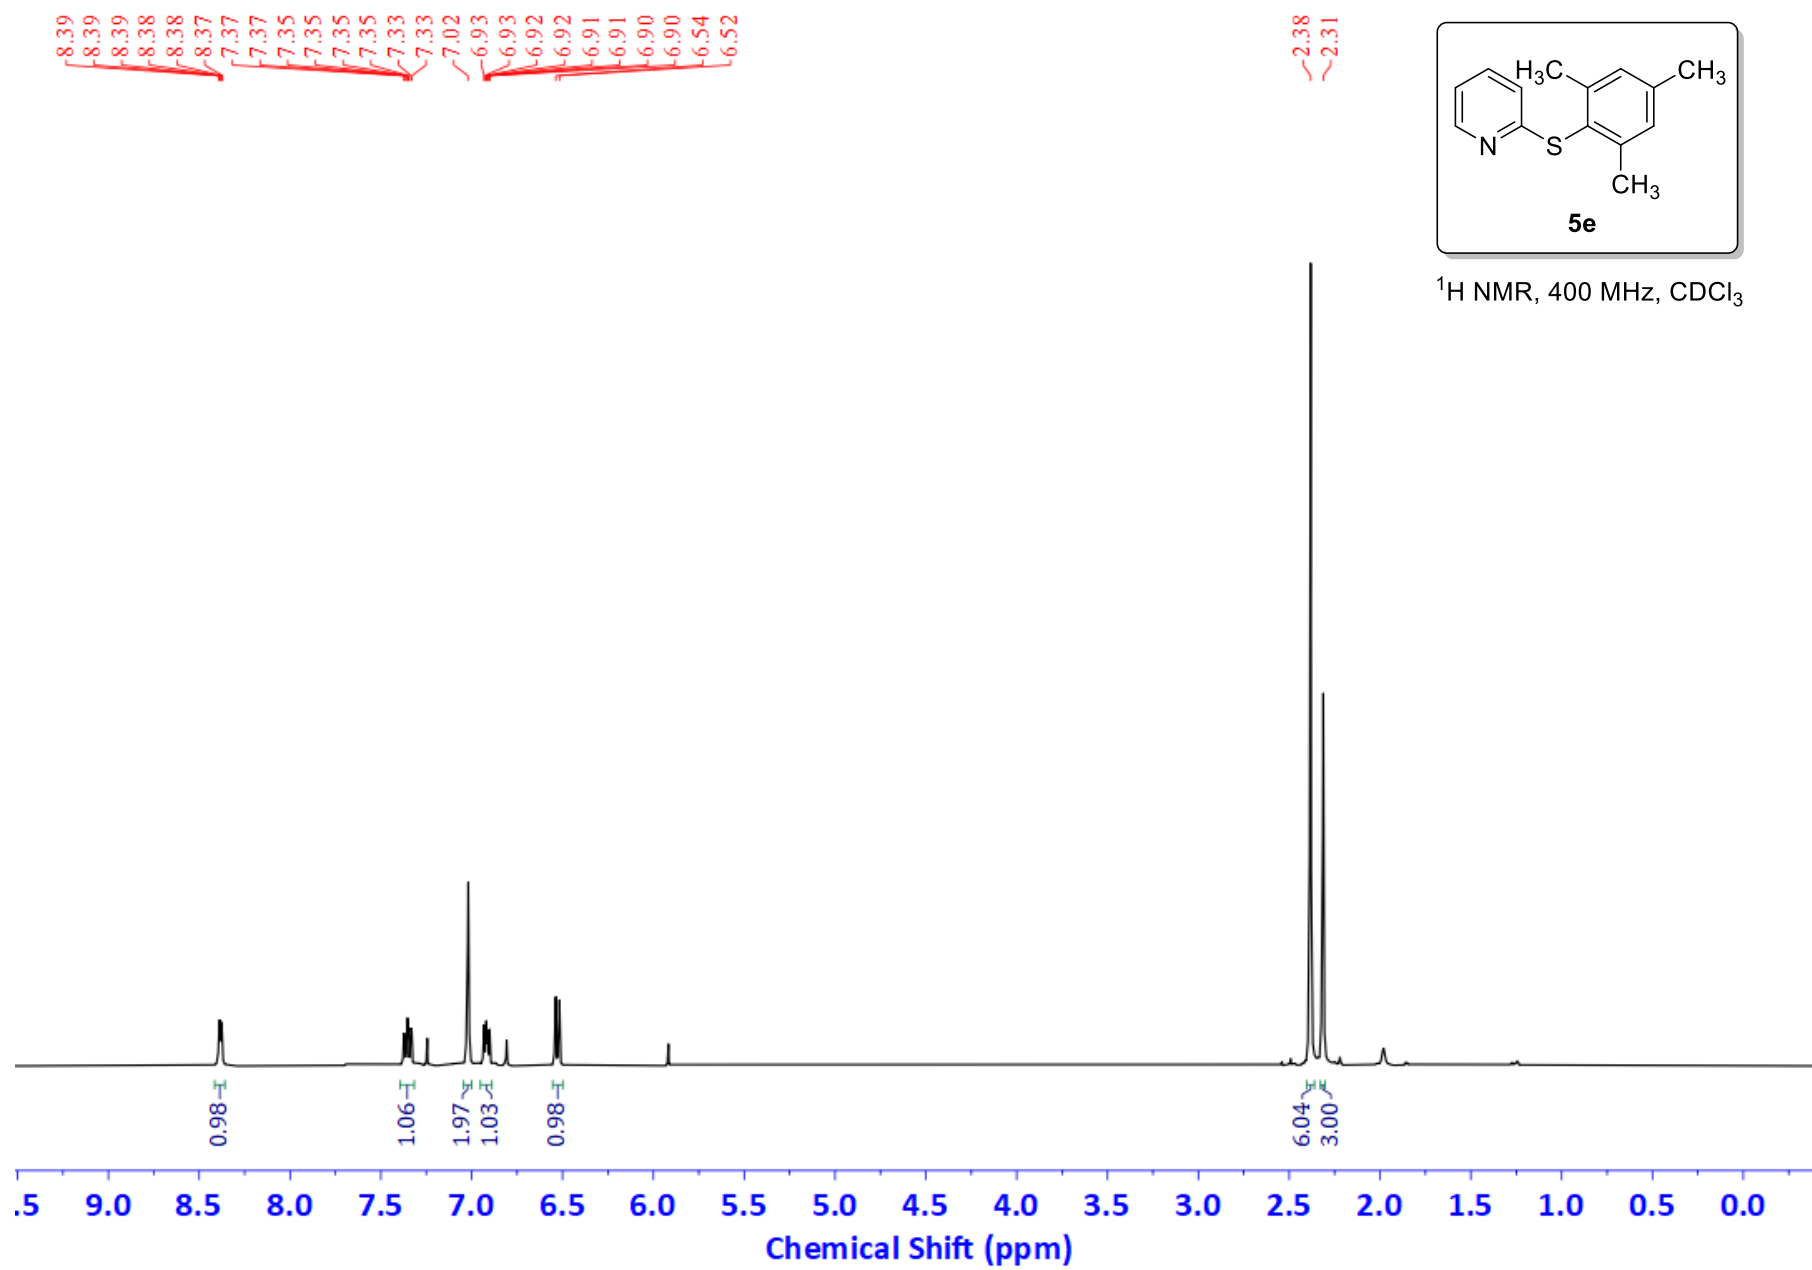

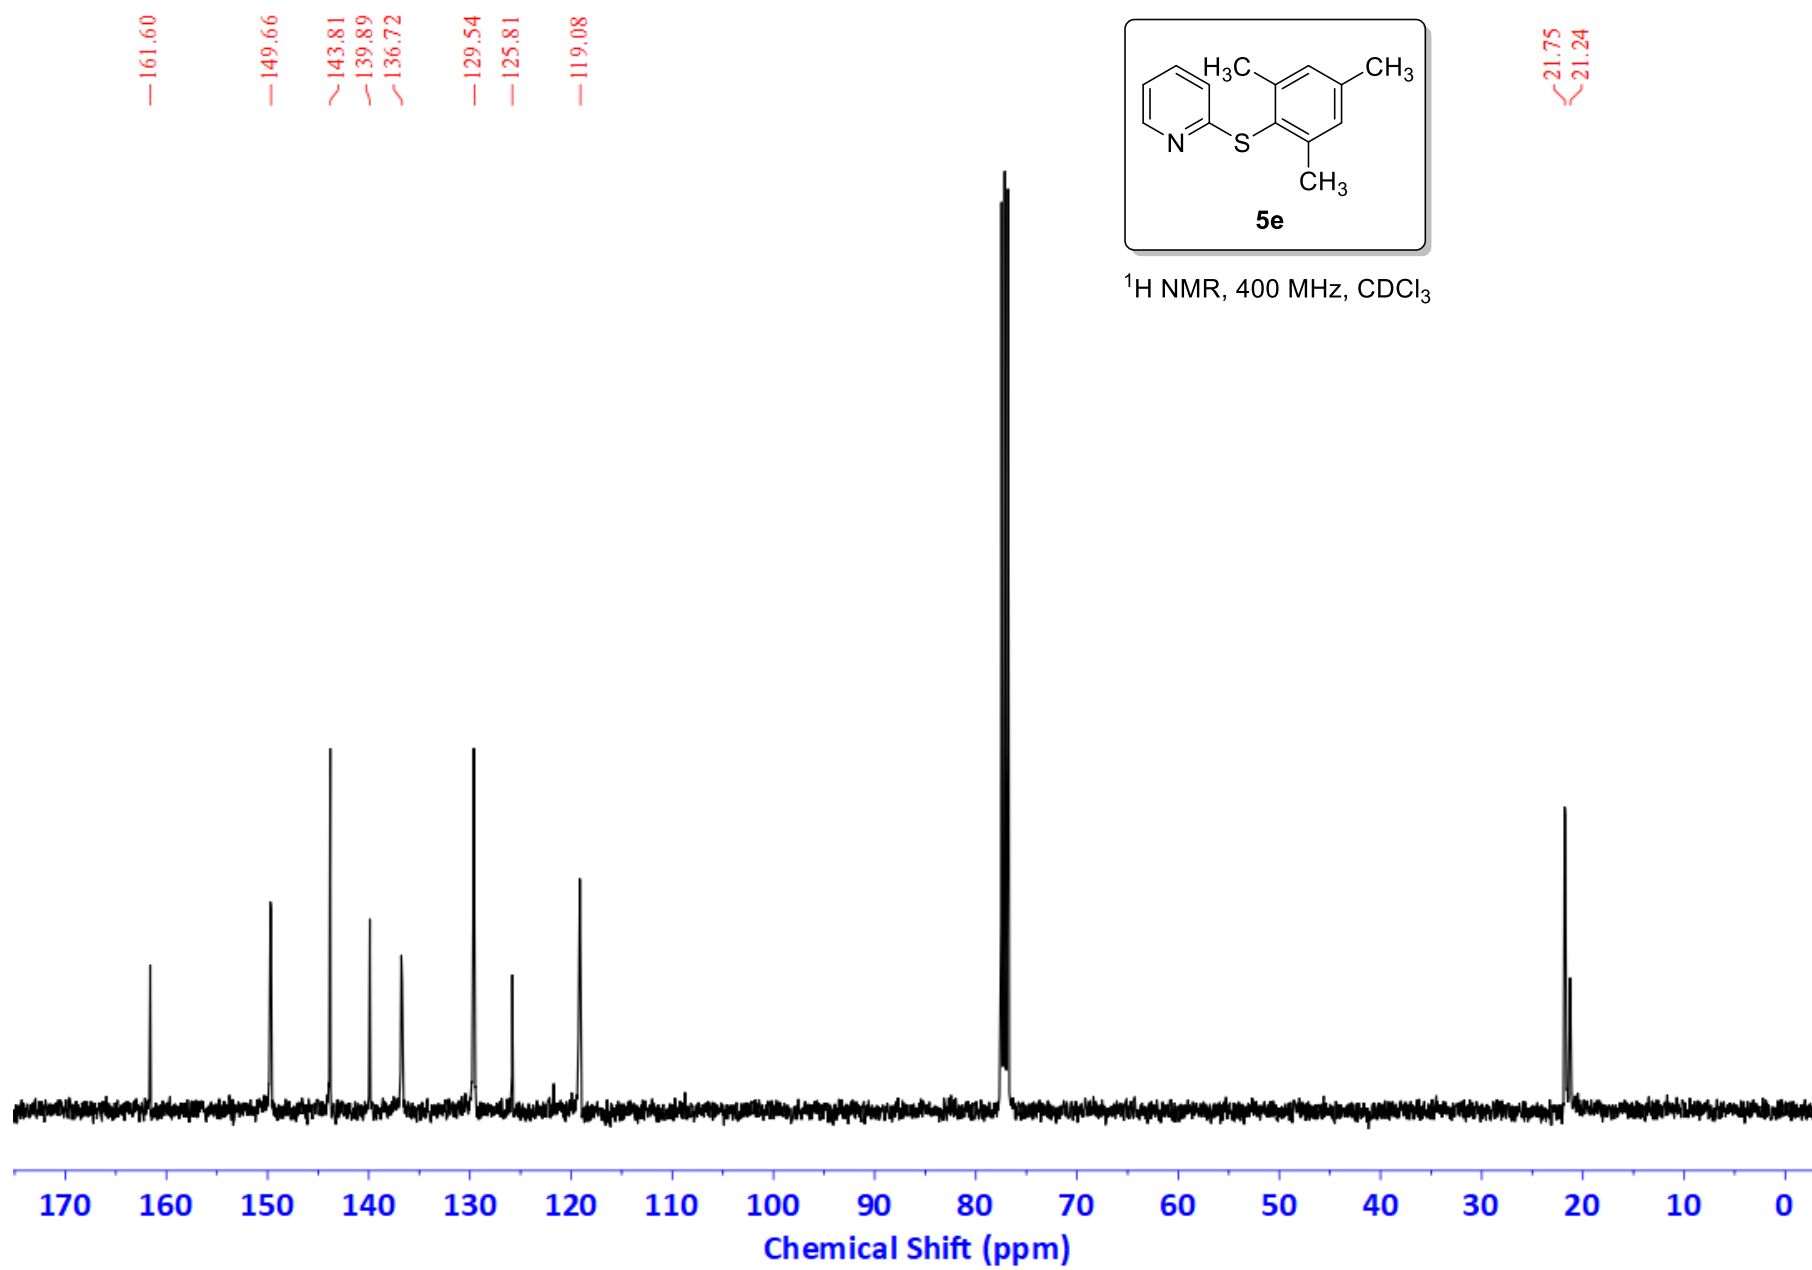

8.51  
8.51  
8.51  
8.50  
8.50  
8.49  
8.49  
8.18  
8.15  
7.64  
7.63  
7.62  
7.62  
7.59  
7.57  
7.30  
7.28  
7.19  
7.18  
7.17  
7.17  
7.16  
7.15

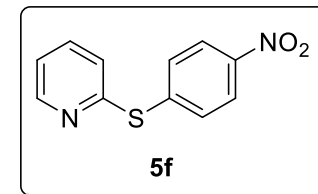

$^1\text{H}$  NMR, 400 MHz,  $\text{CDCl}_3$

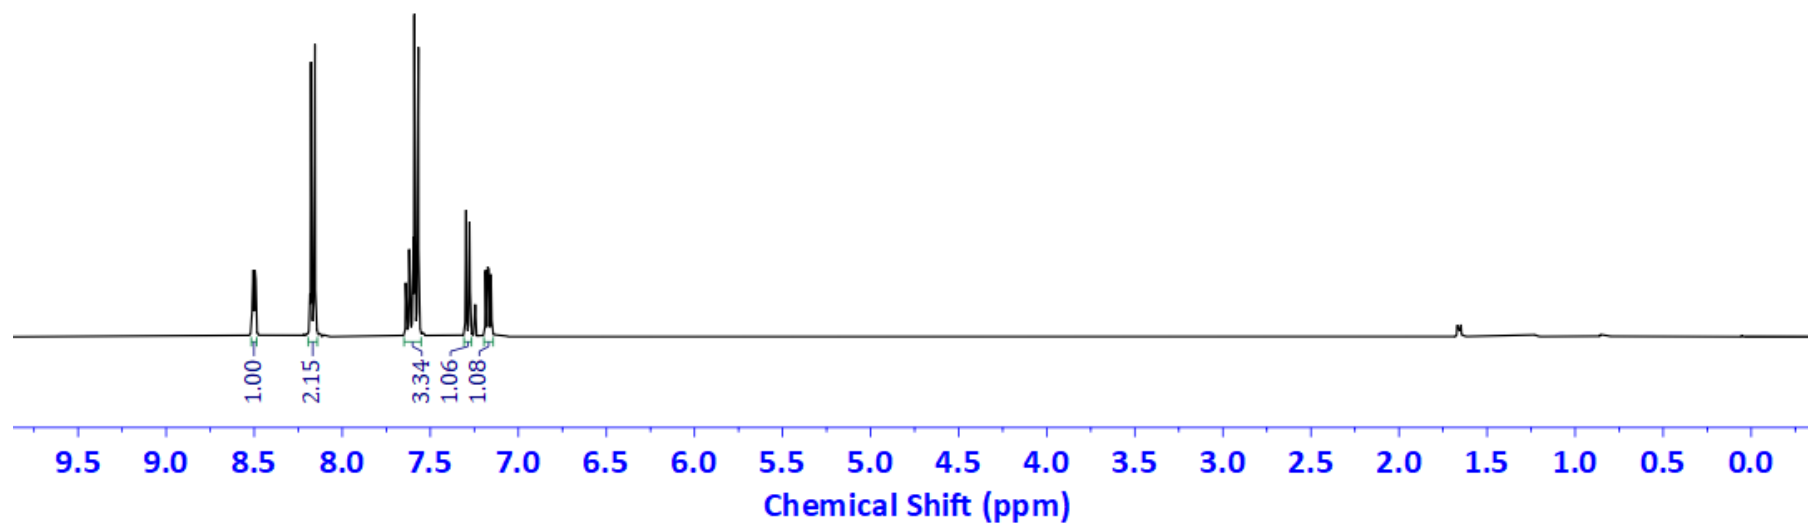

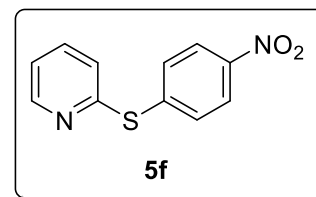

$^1\text{H}$  NMR, 400 MHz,  $\text{CDCl}_3$

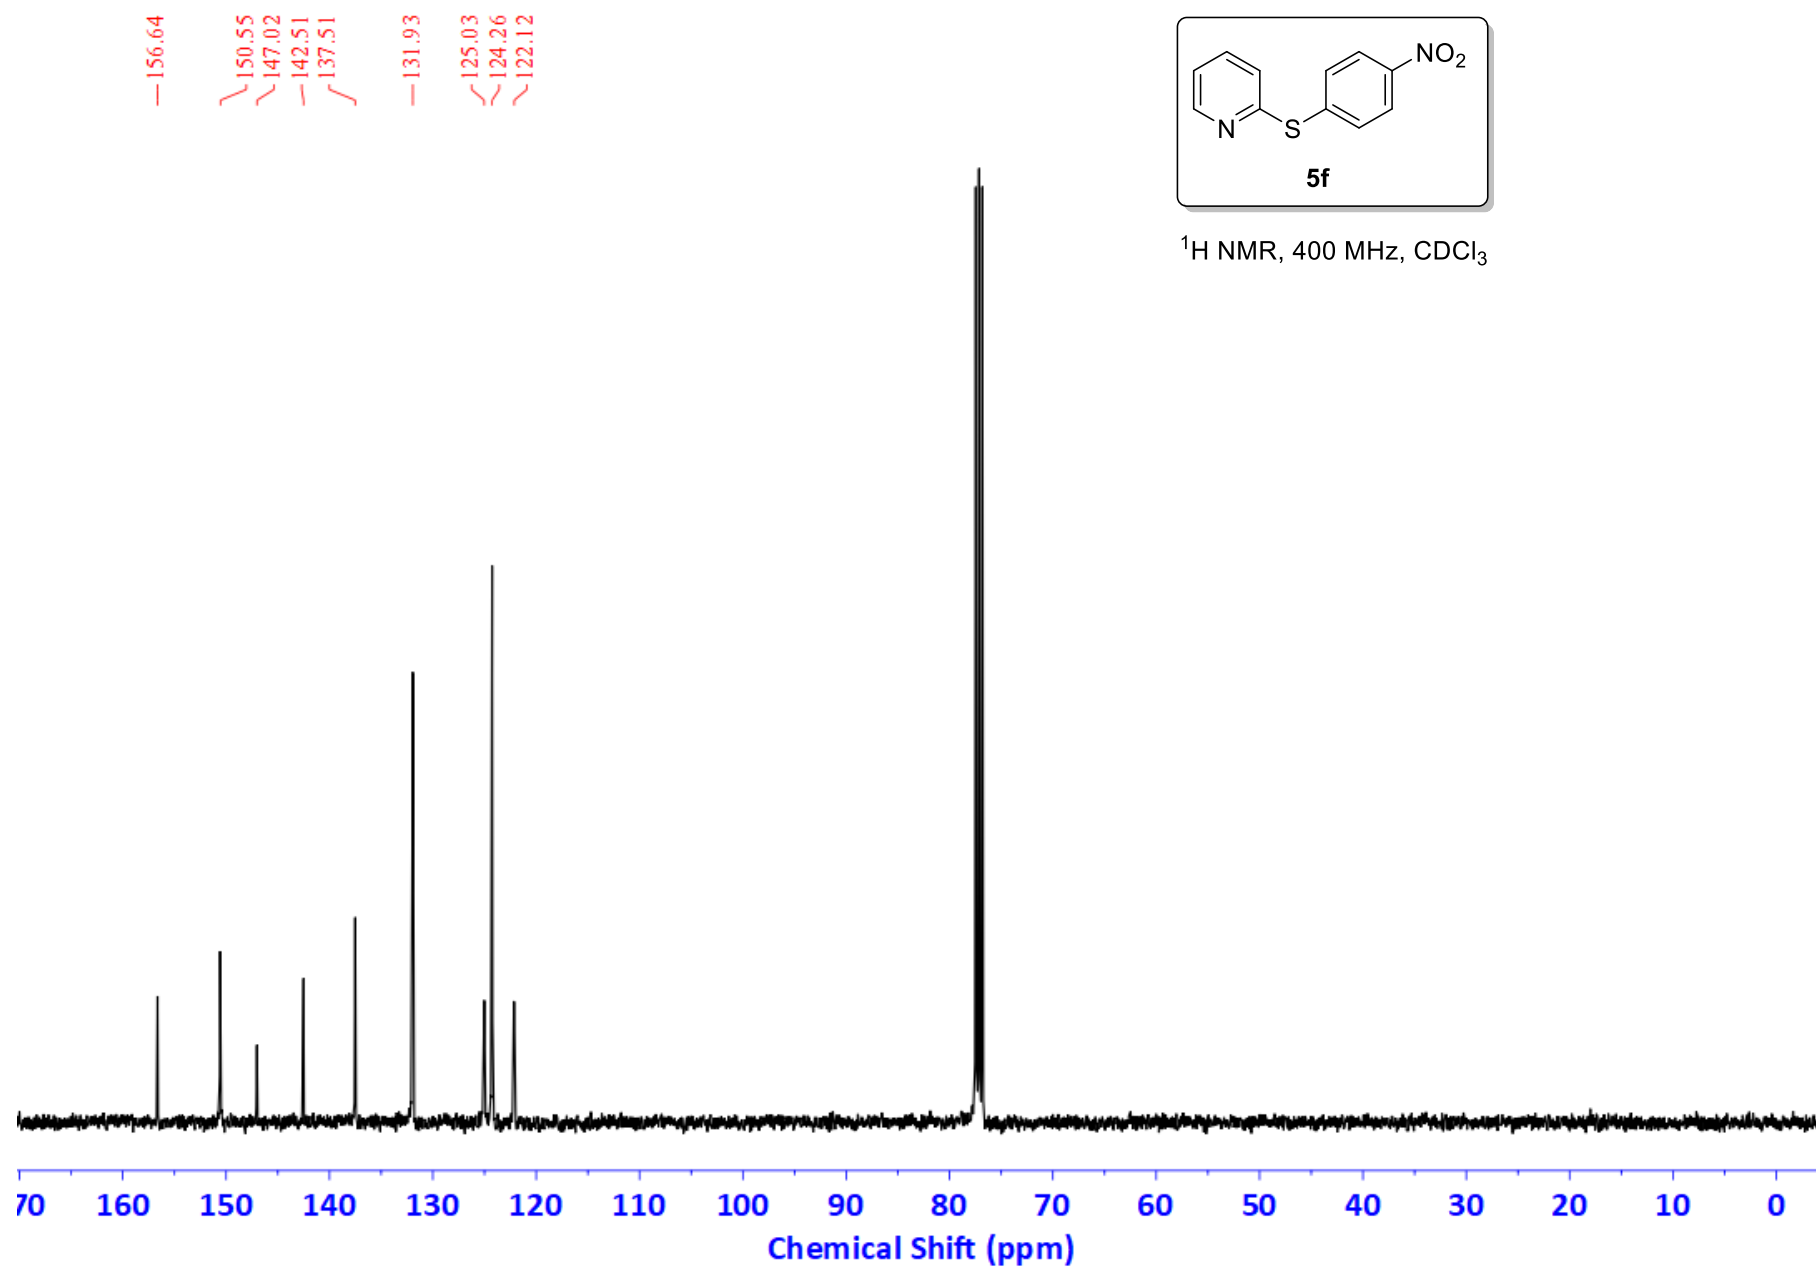

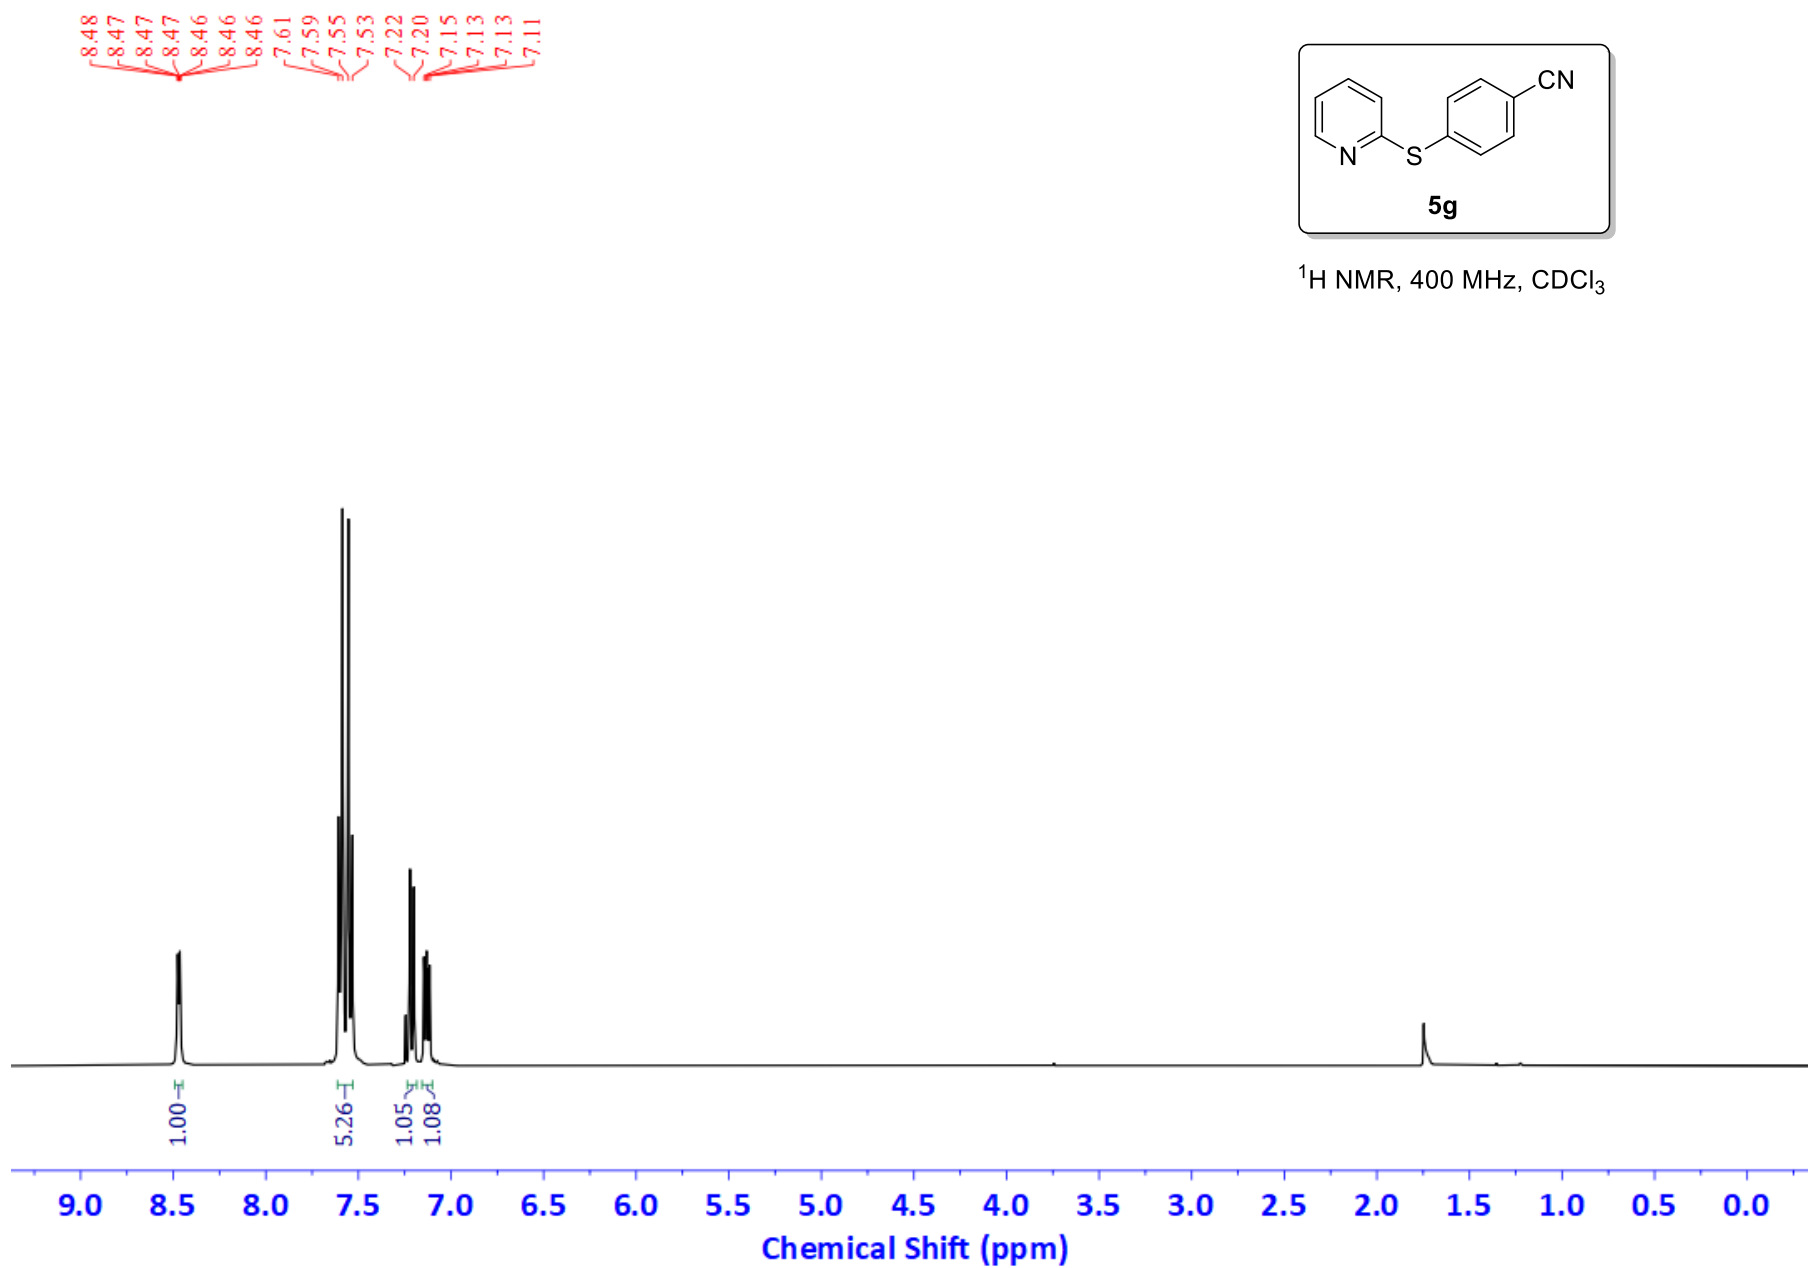

— 157.20  
— 150.45  
— 139.79  
— 137.42  
— 132.75  
— 132.54  
— 124.51  
— 121.86  
— 118.58  
— 111.37

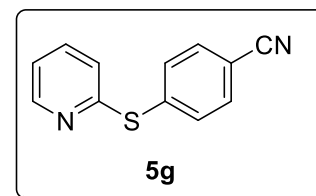

$^1\text{H}$  NMR, 400 MHz,  $\text{CDCl}_3$

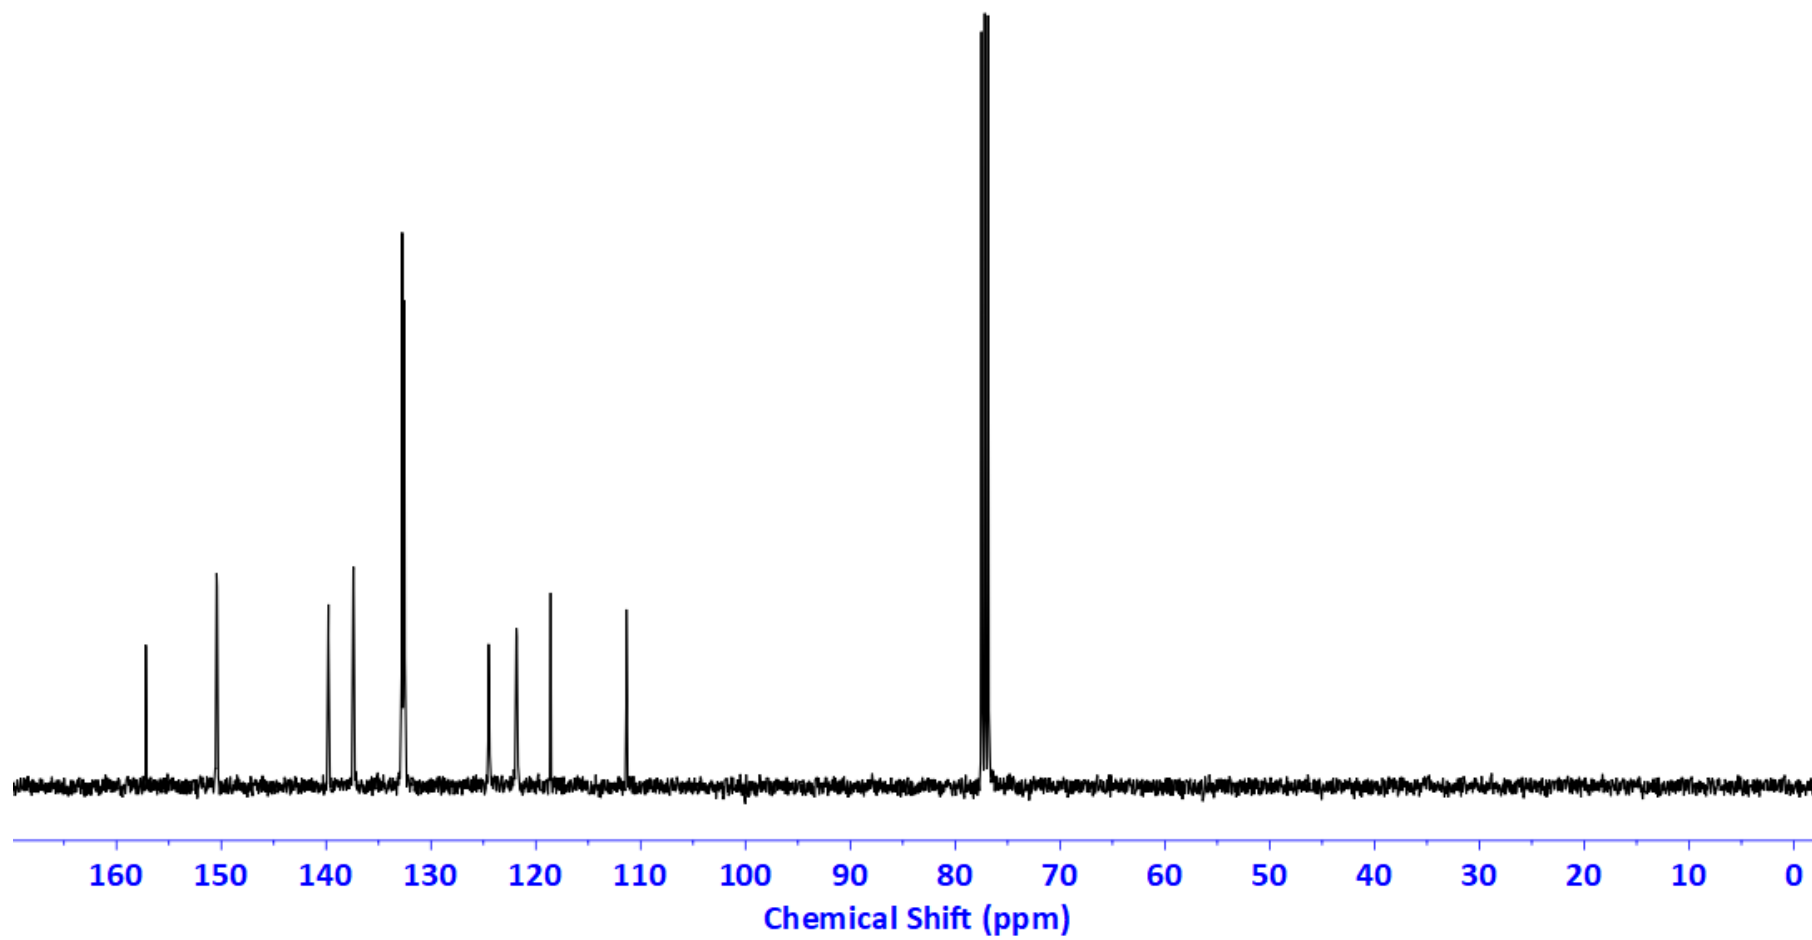



8.46  
8.46  
8.46  
8.45  
8.45  
8.44  
8.44  
7.65  
7.62  
7.62  
7.60  
7.10  
7.10  
7.10  
7.09  
7.09  
7.08  
7.07  
7.07  
7.06  
7.06

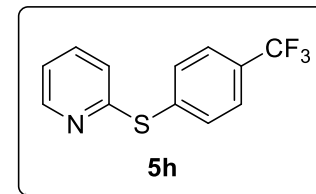

$^1\text{H NMR}$ , 400 MHz,  $\text{CDCl}_3$

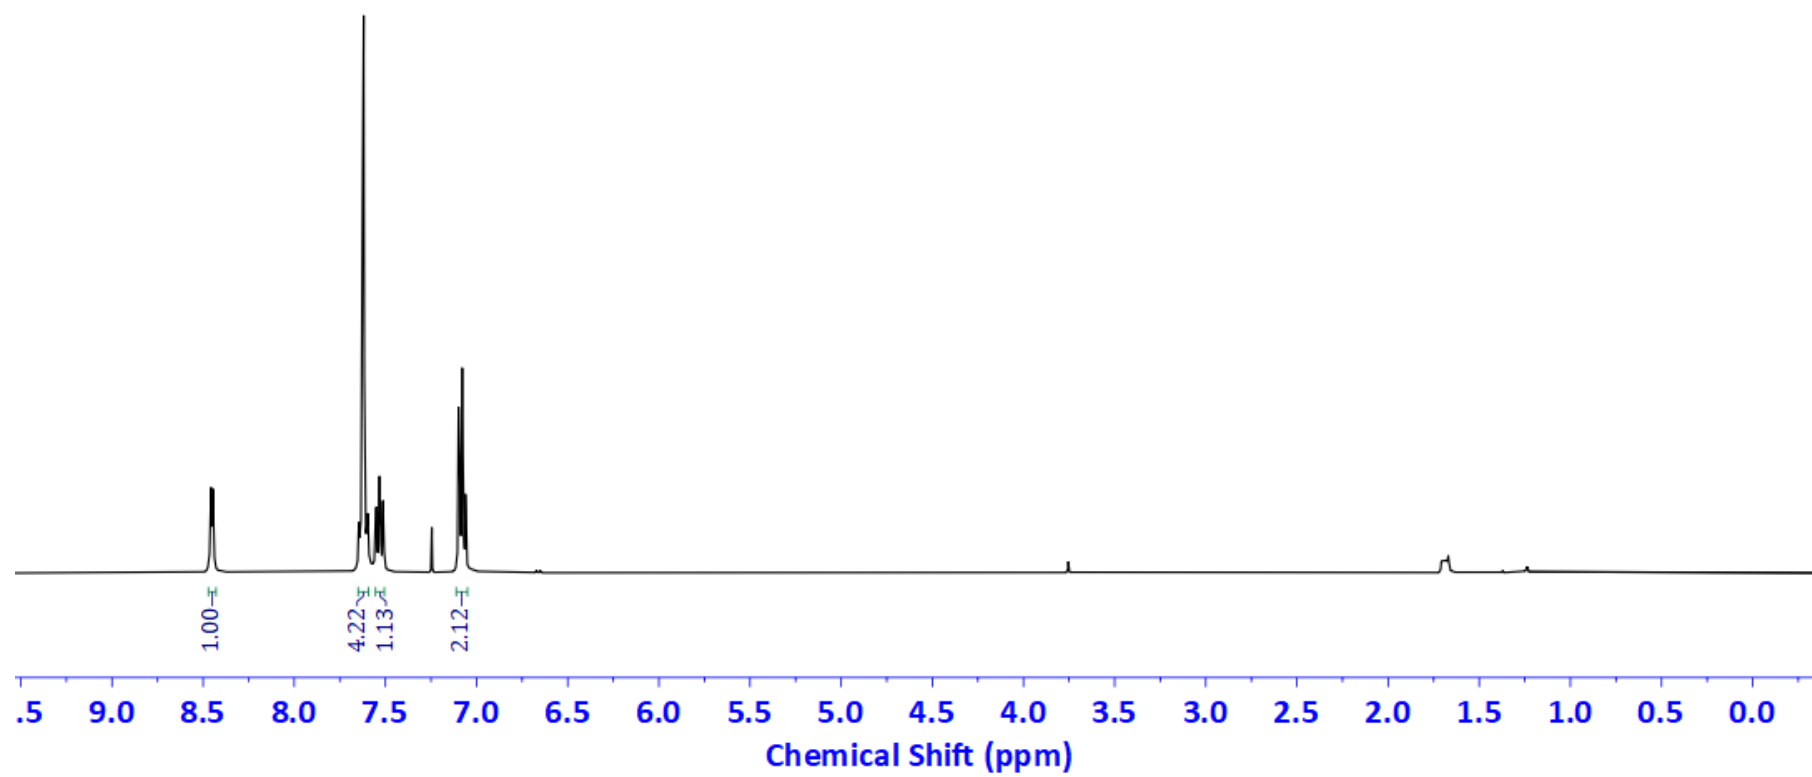

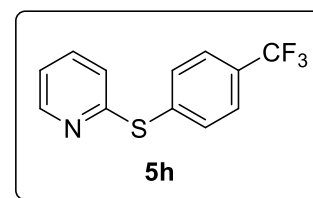

$^1\text{H}$  NMR, 400 MHz,  $\text{CDCl}_3$

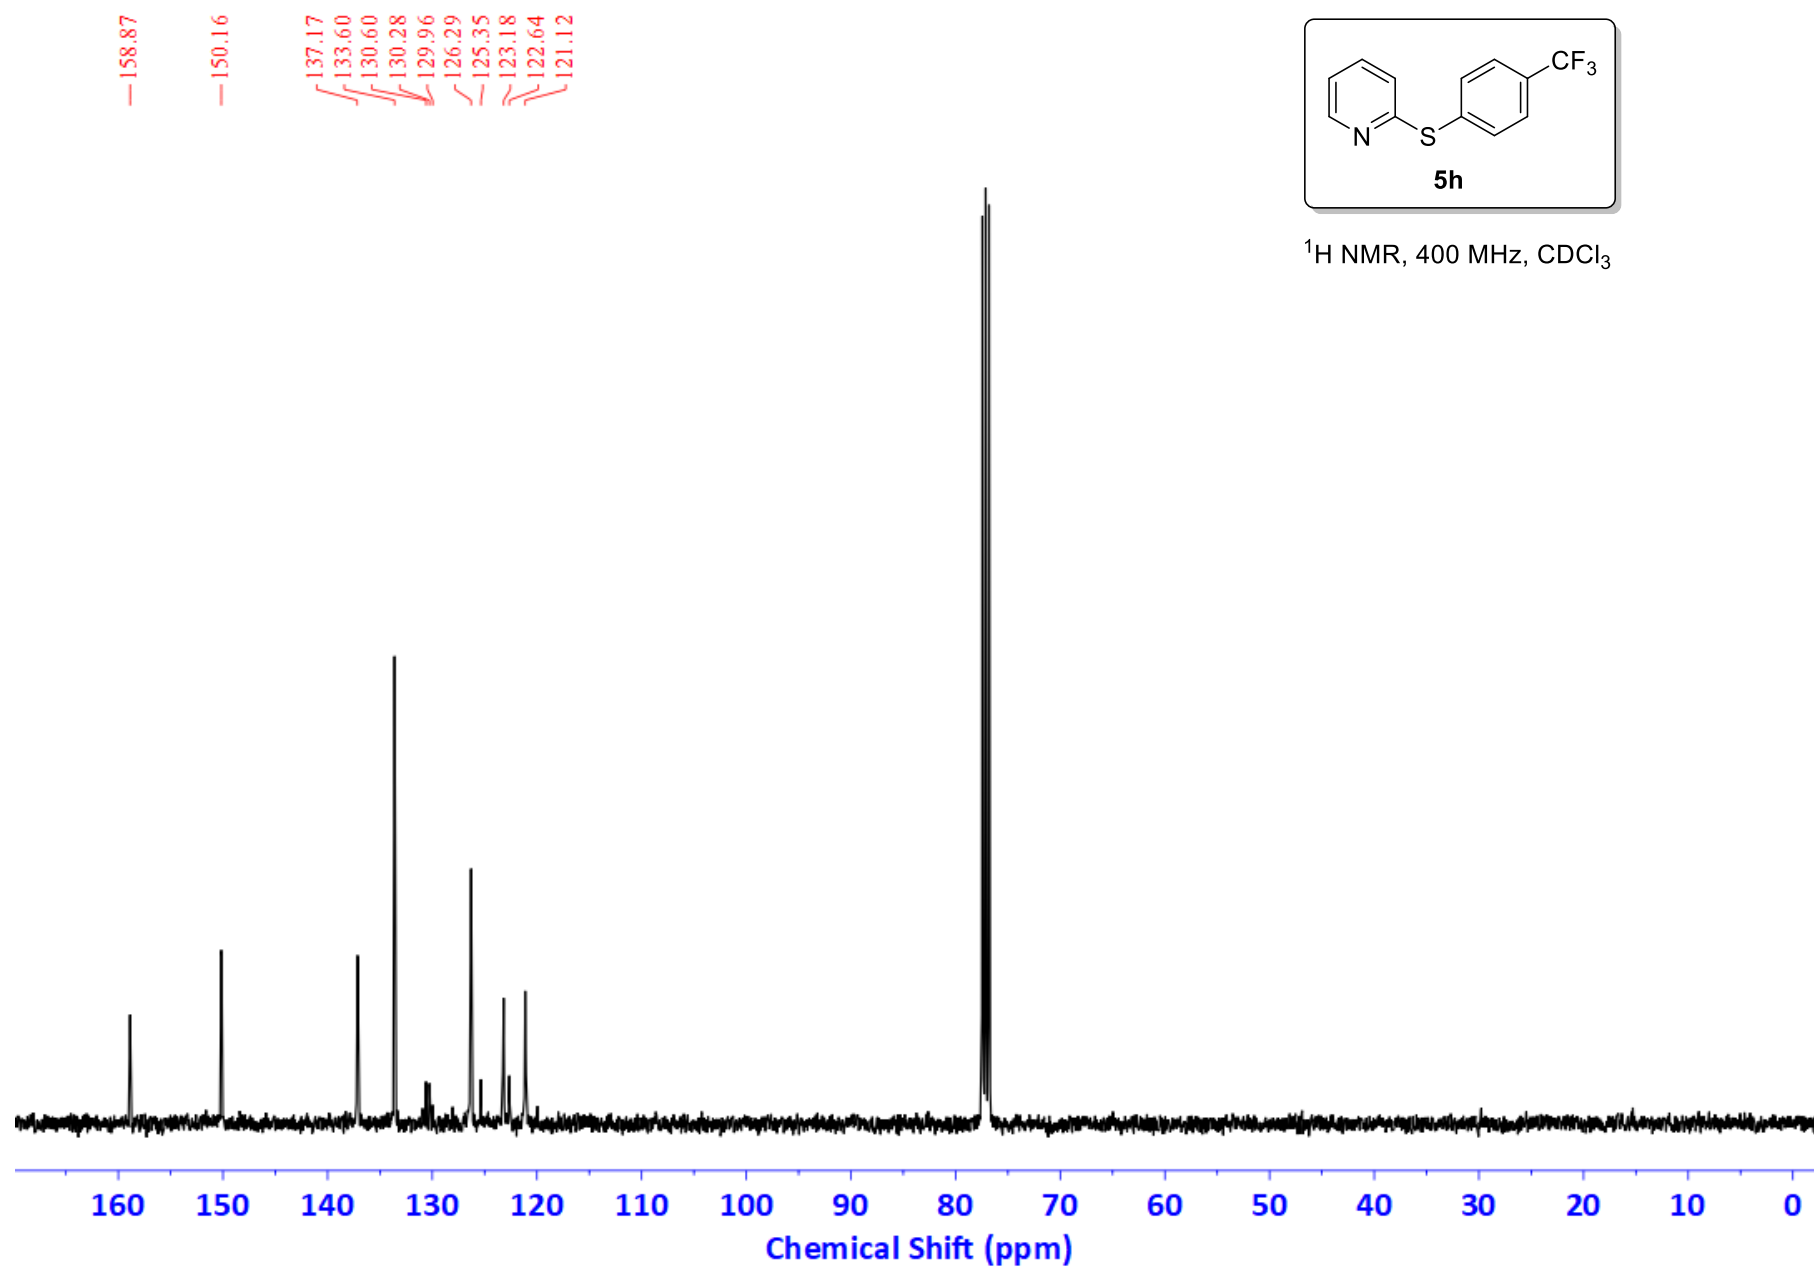

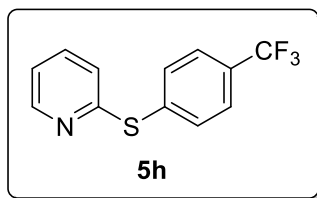

$^{19}\text{F}$  NMR, 376 MHz,  $\text{CDCl}_3$ , 298K

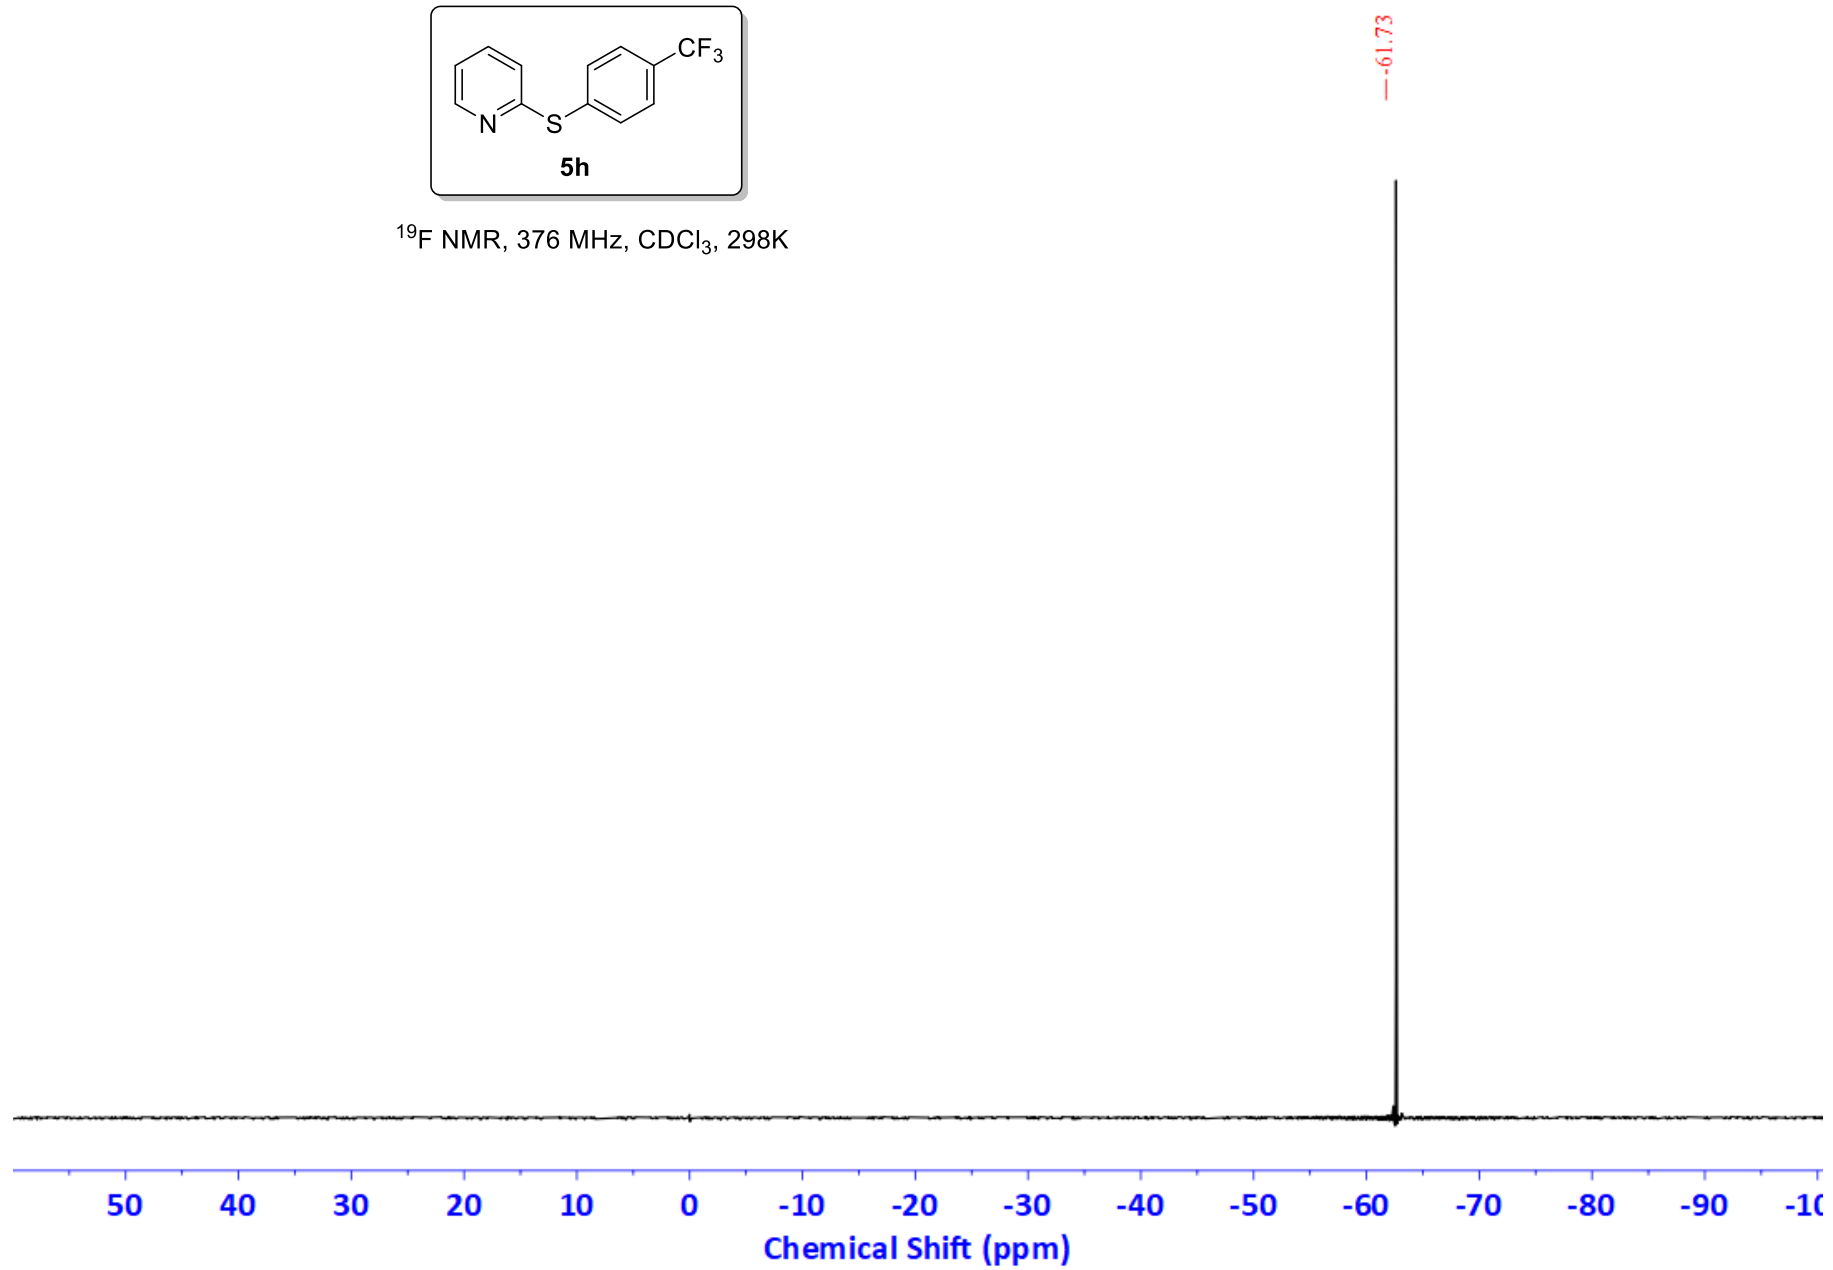

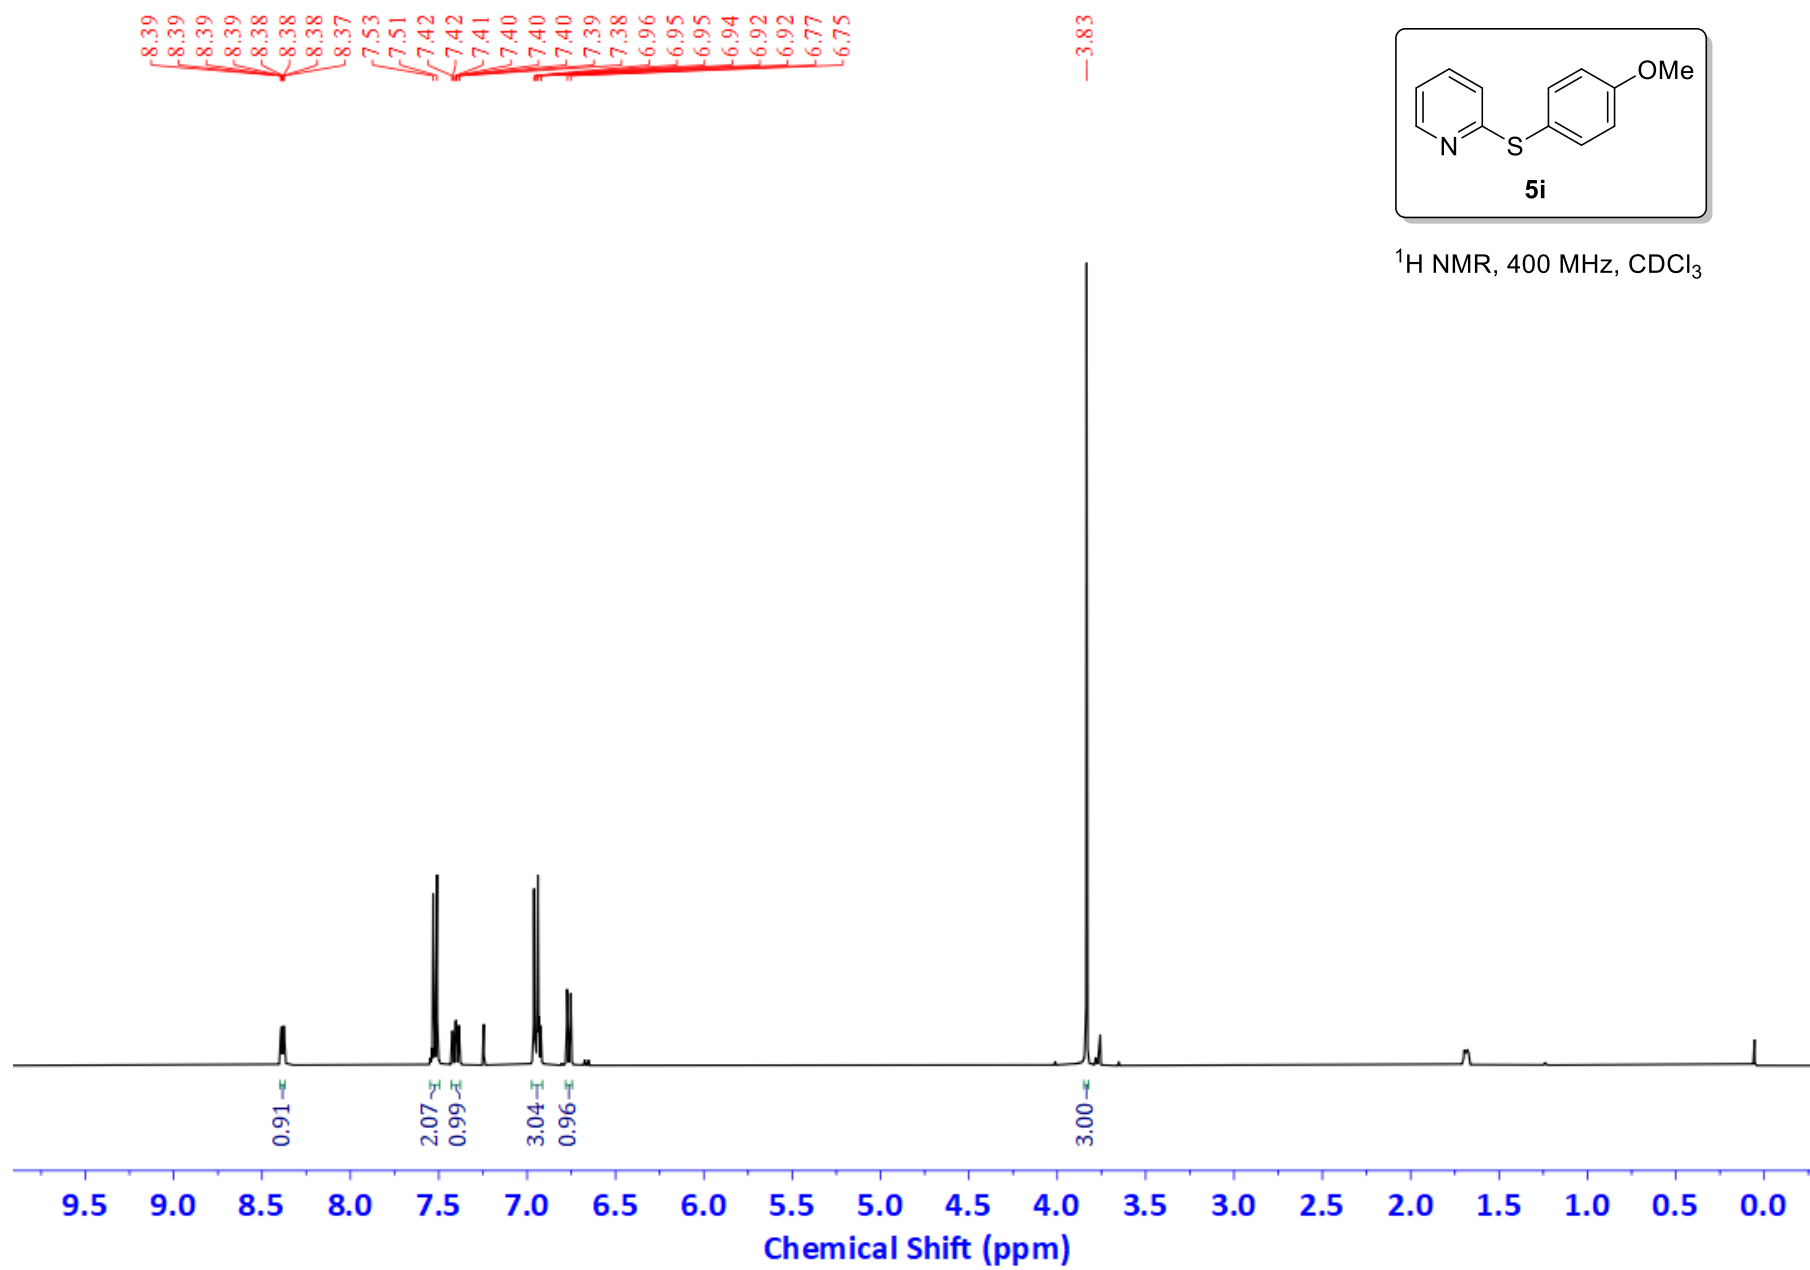

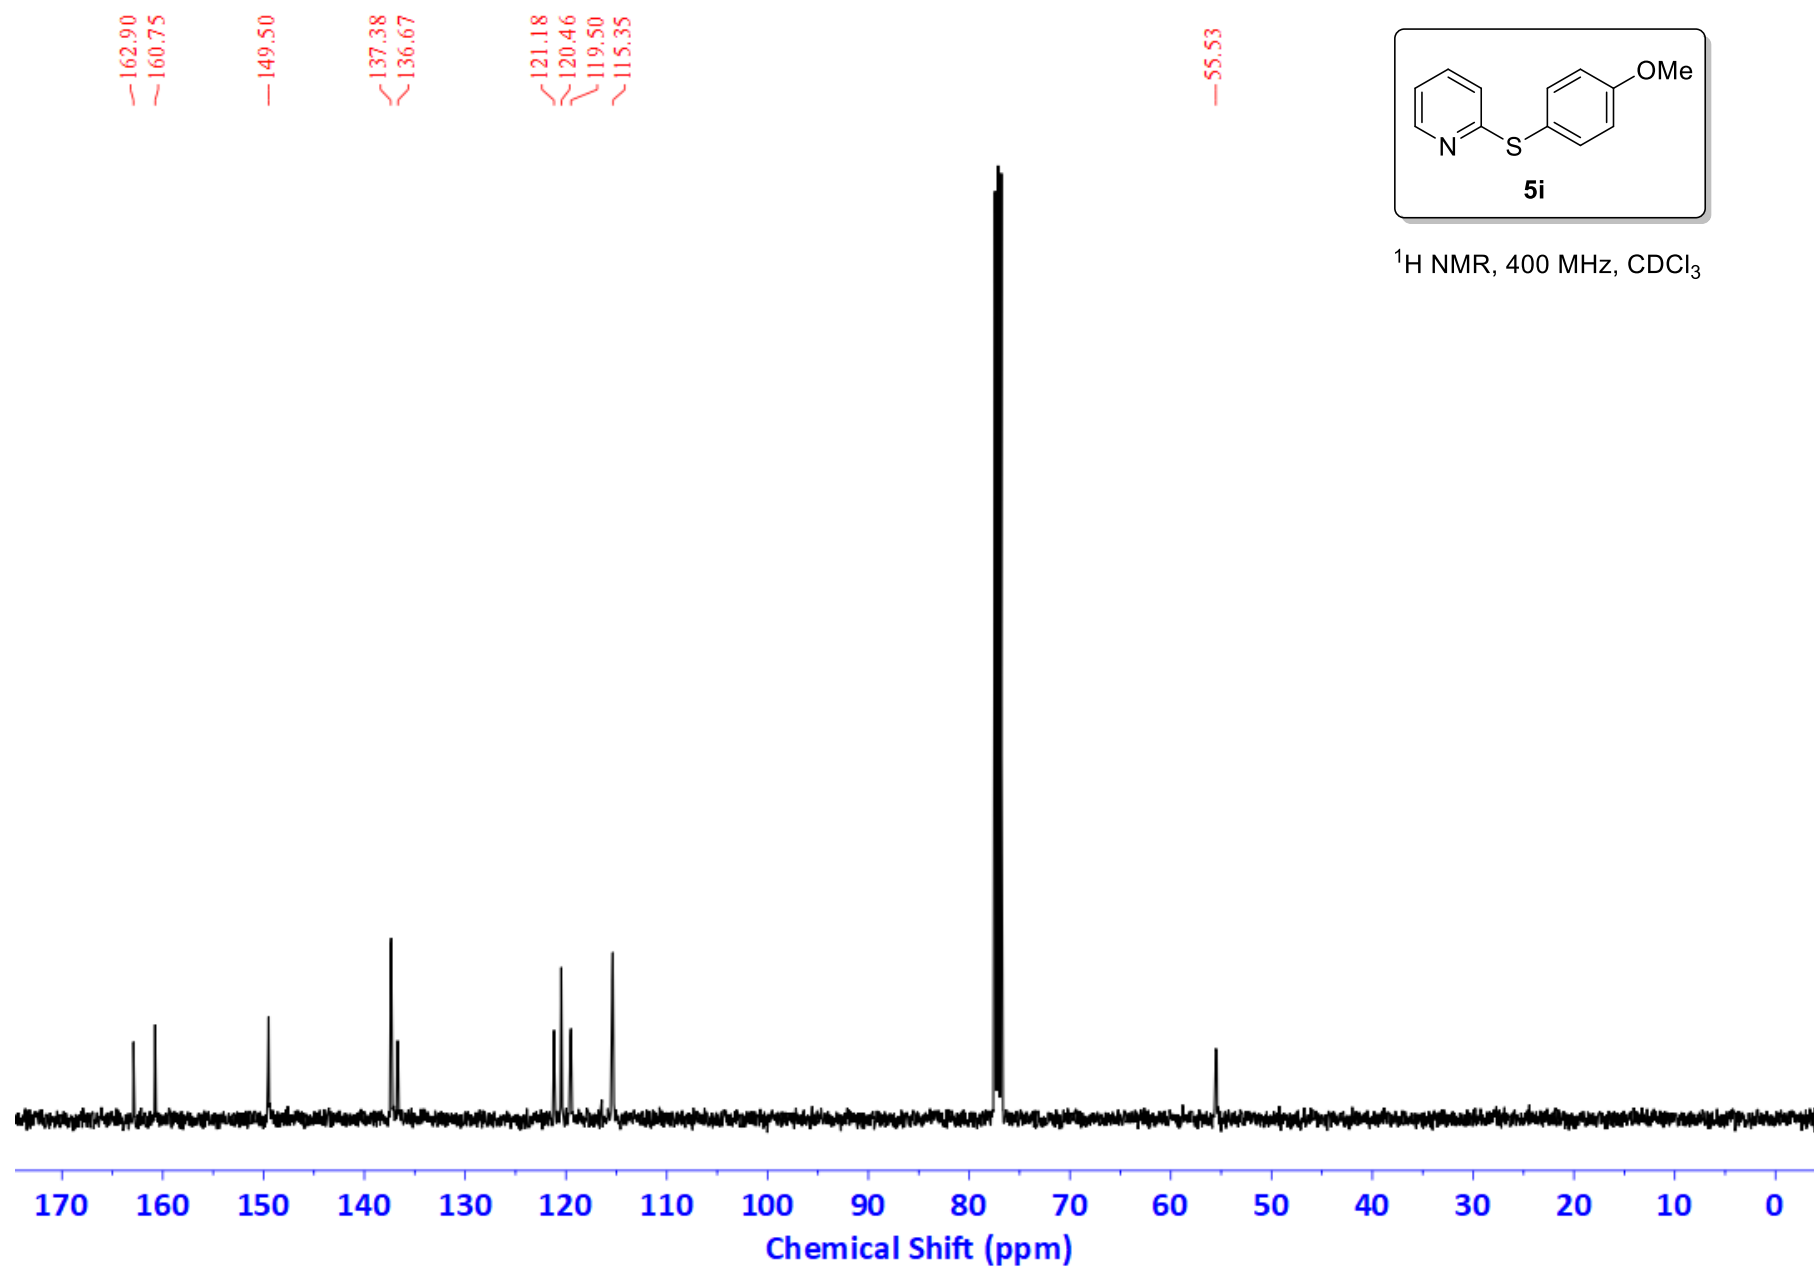

8.44  
8.44  
8.43  
8.43  
8.42  
8.42  
7.82  
7.74  
7.72  
7.62  
7.53  
7.51  
7.49  
7.07  
7.05  
7.05  
7.05  
7.04  
7.04  
7.03  
7.02  
7.00

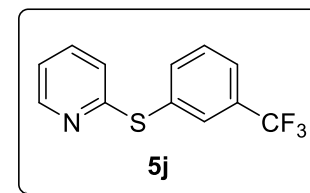

$^1\text{H}$  NMR, 400 MHz,  $\text{CDCl}_3$

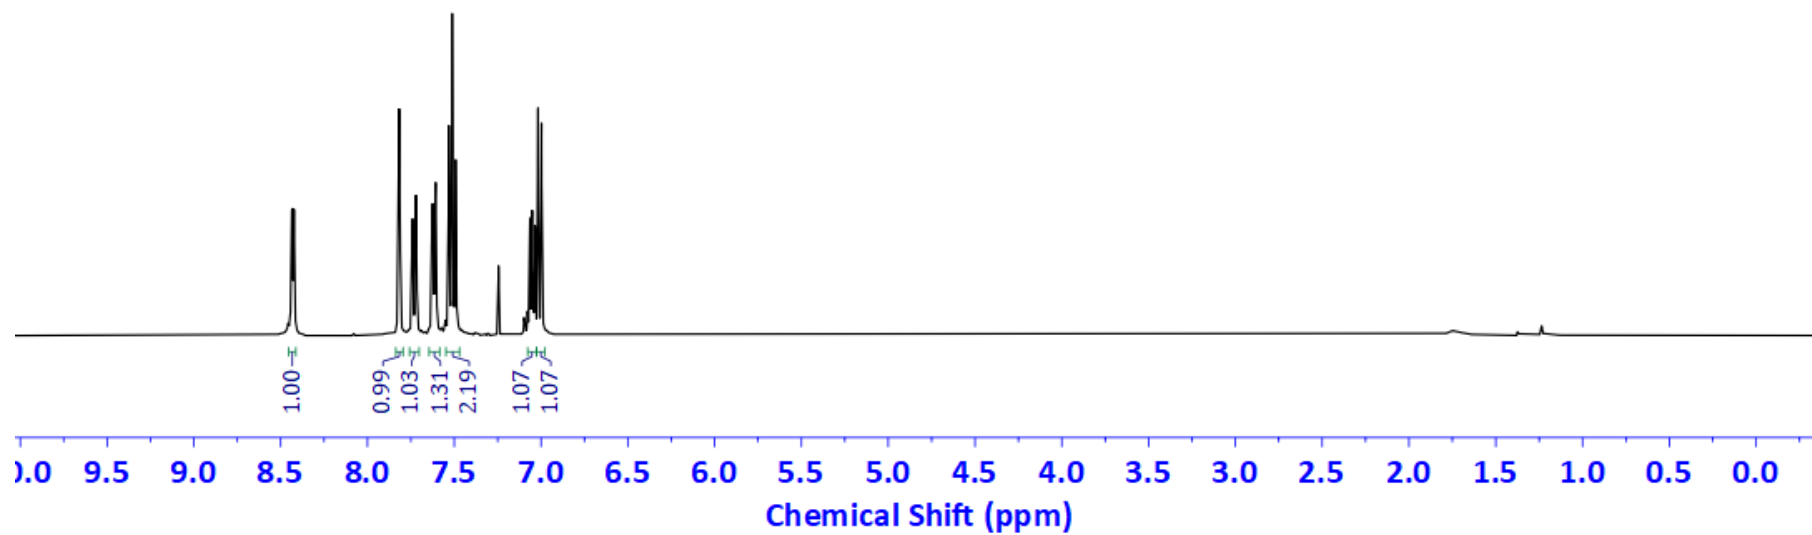

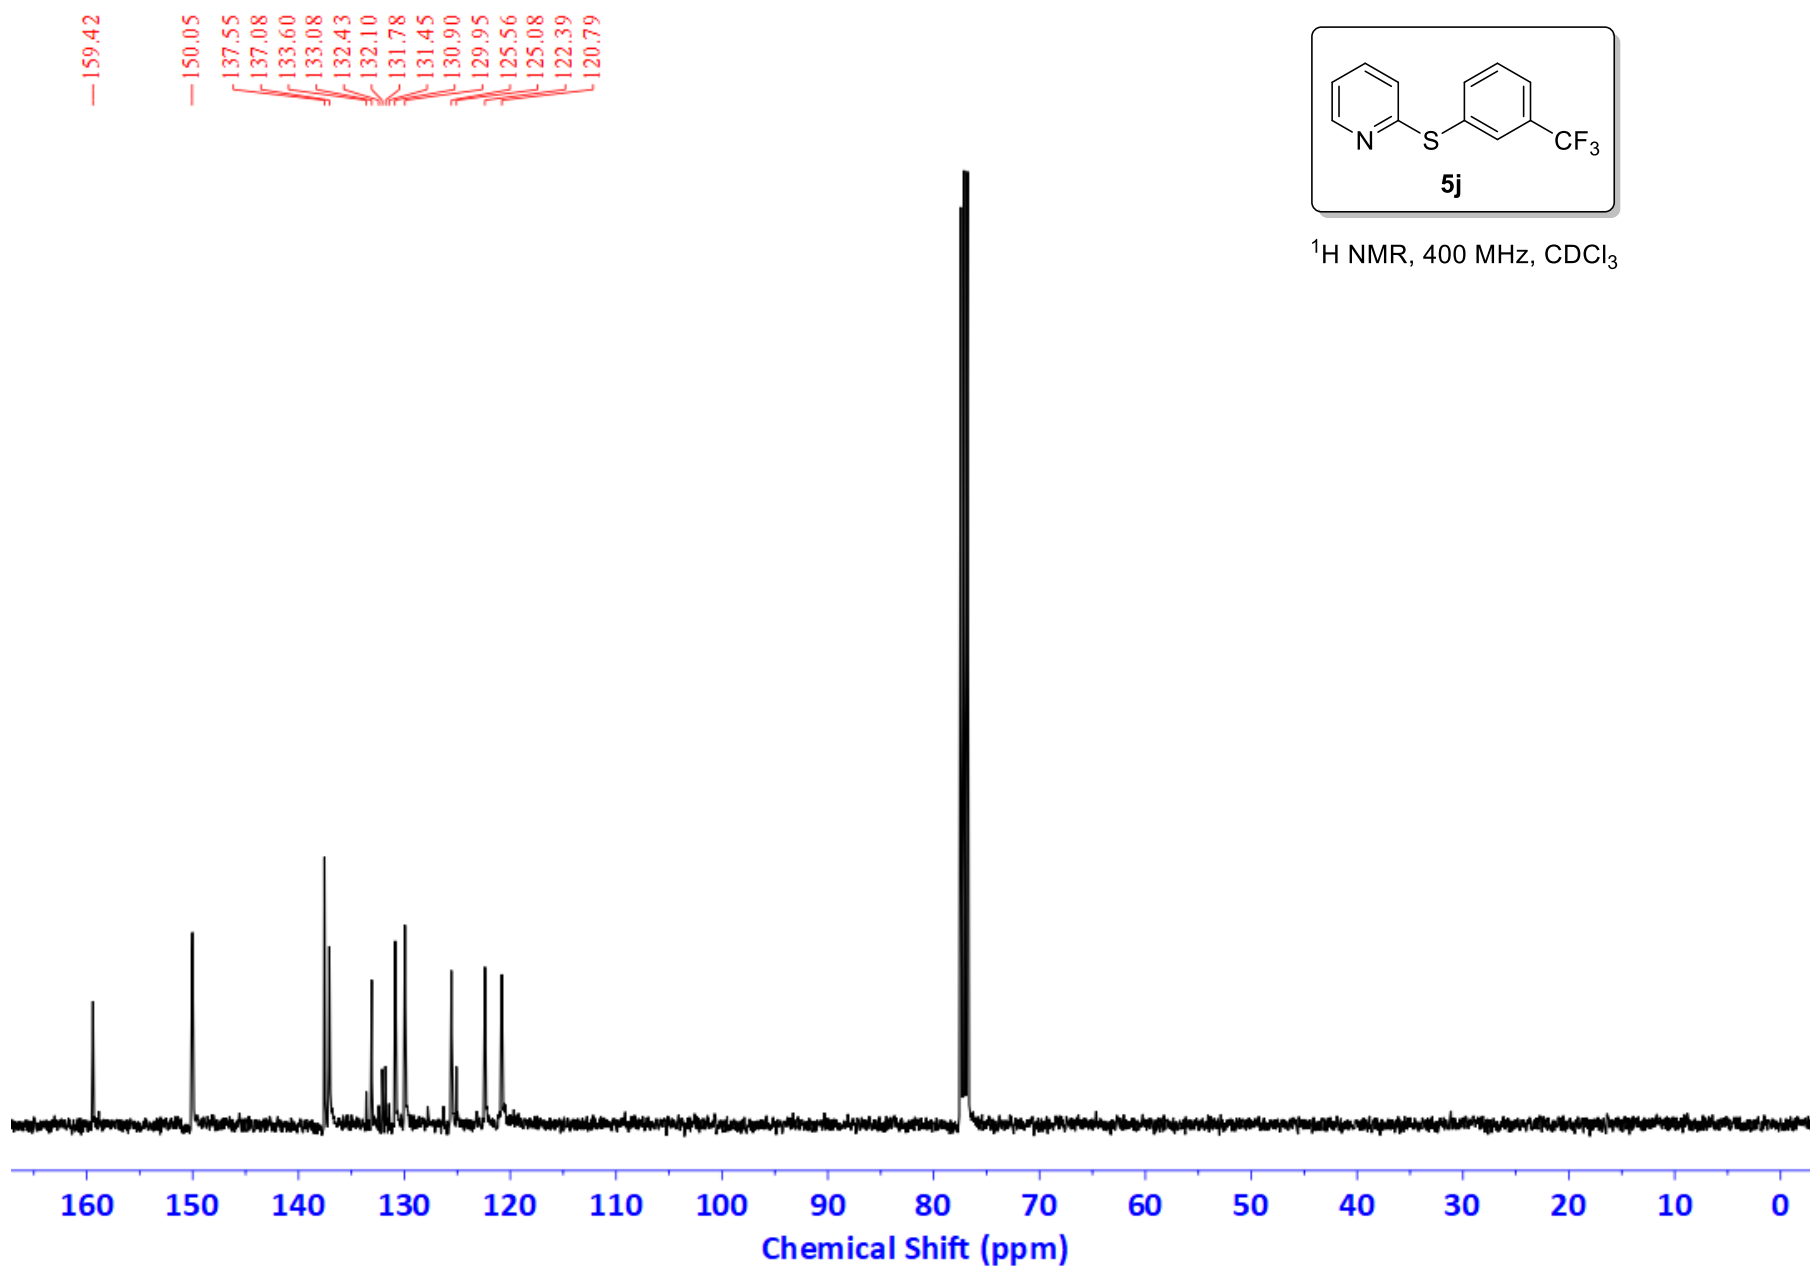

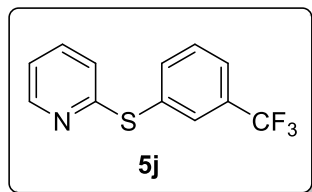

$^{19}\text{F}$  NMR, 376 MHz,  $\text{CDCl}_3$ , 298K

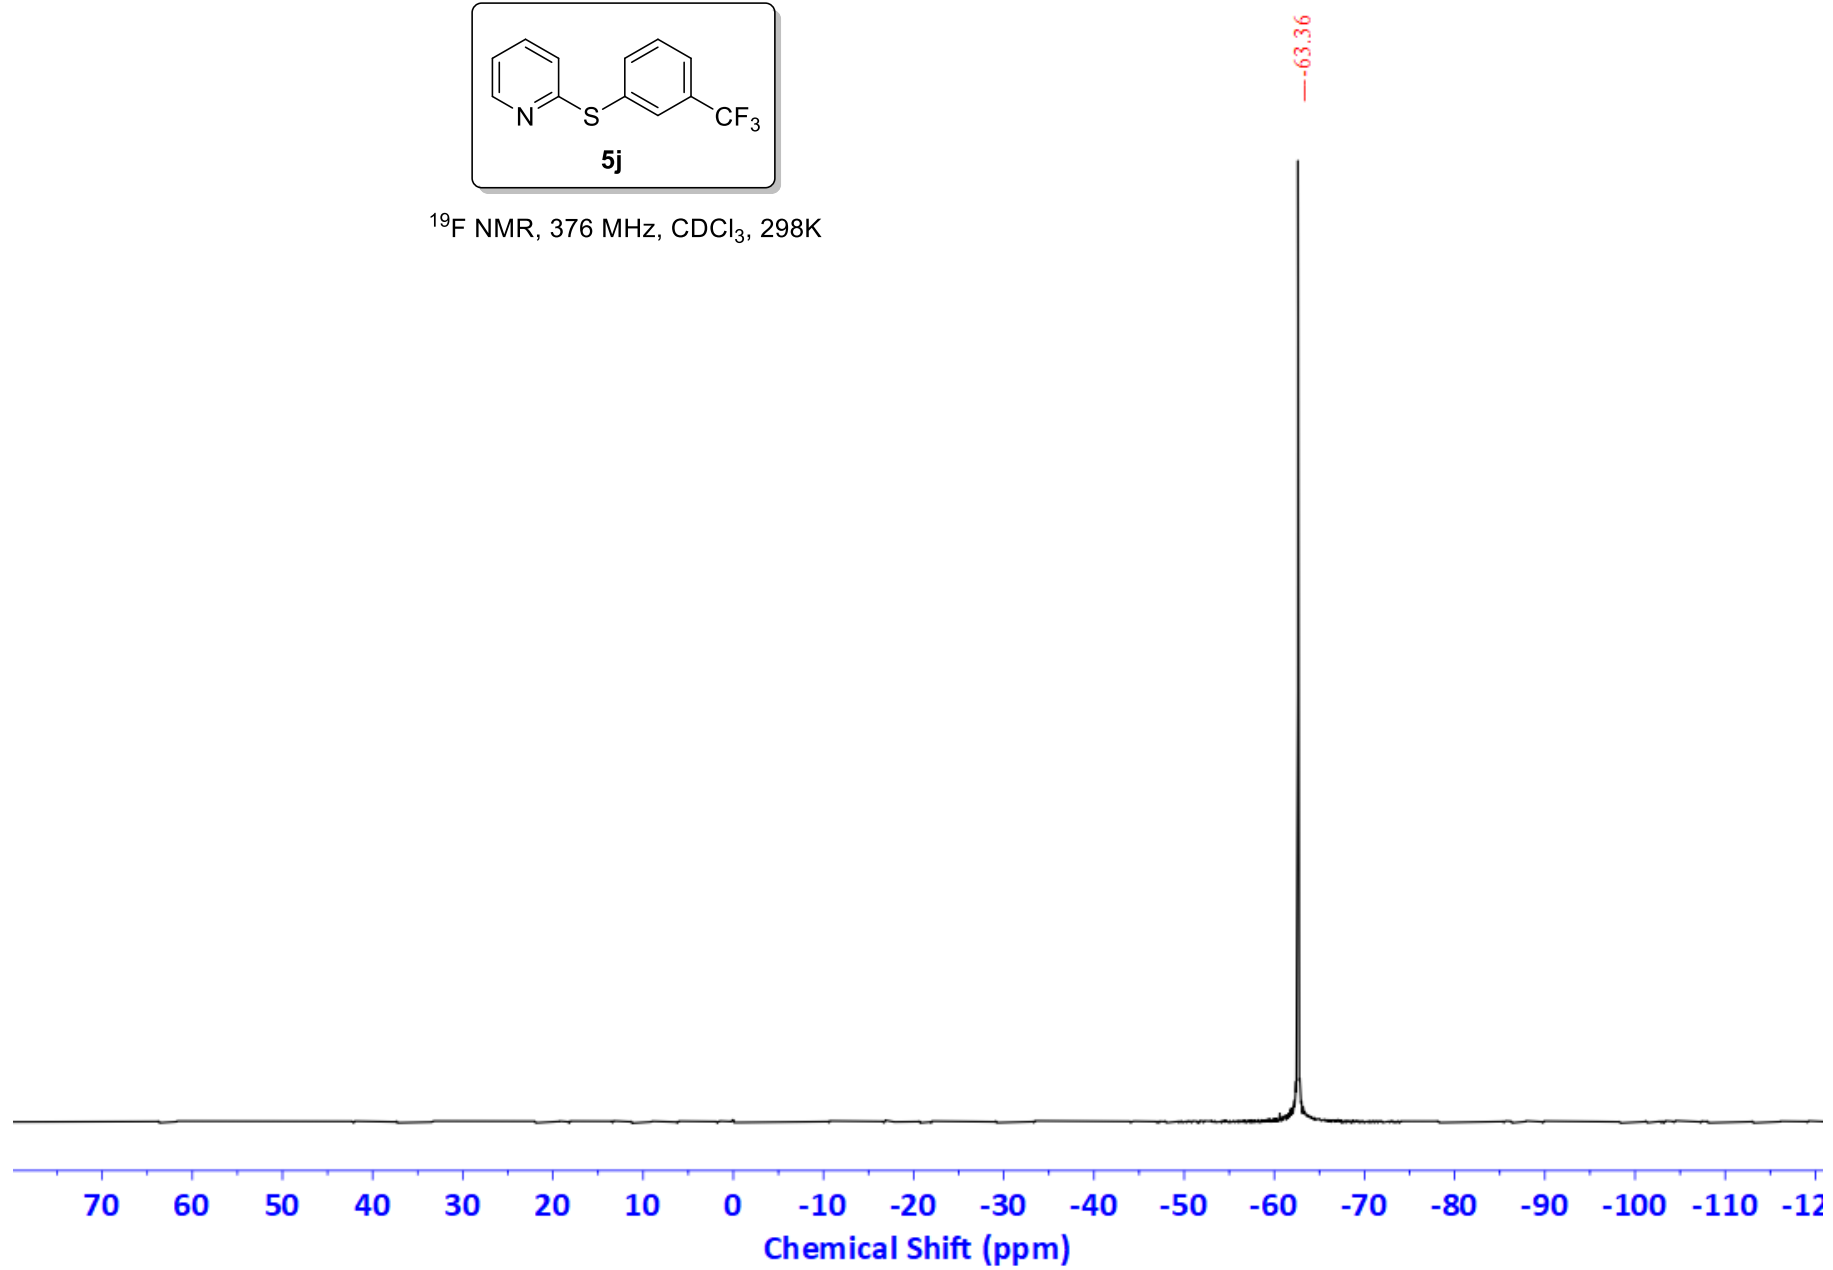



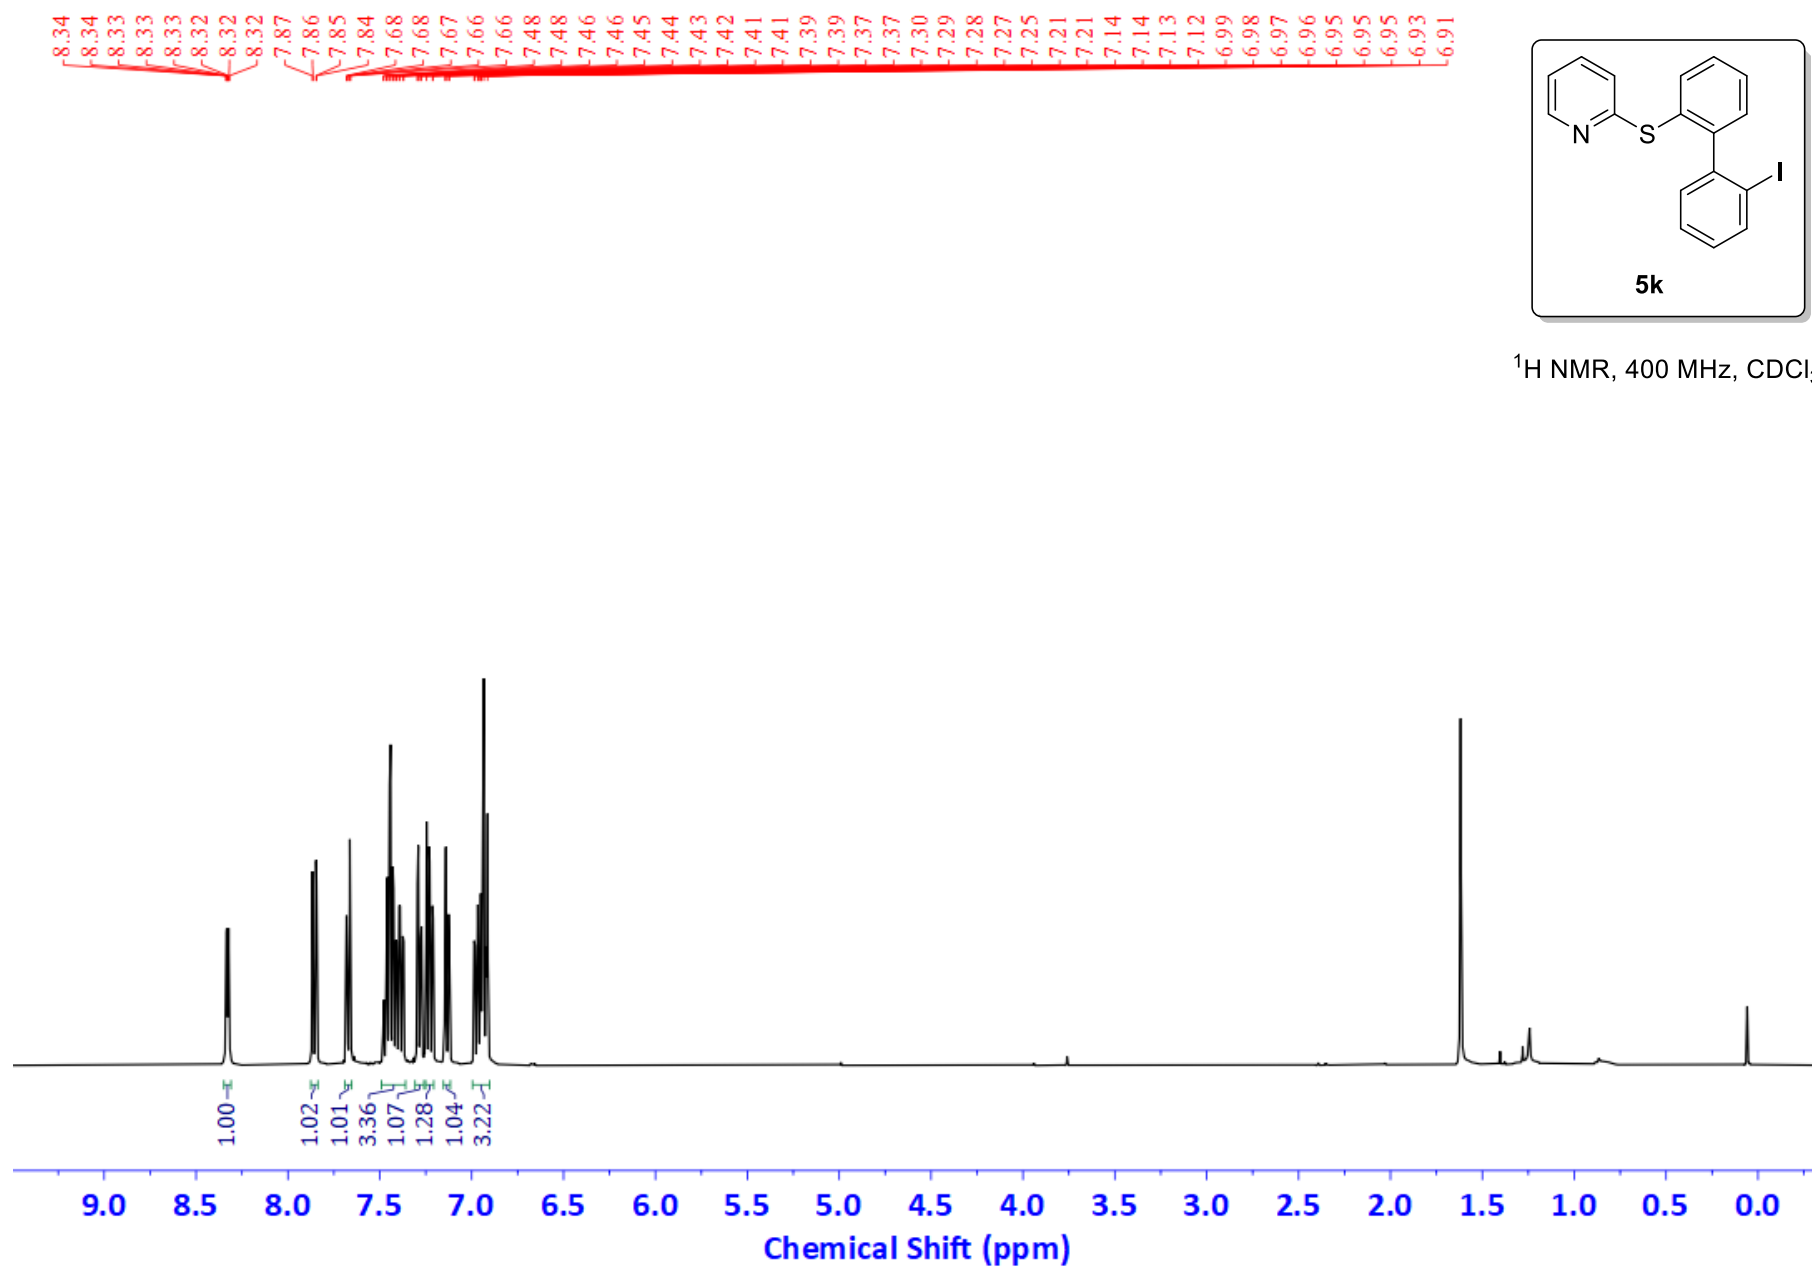

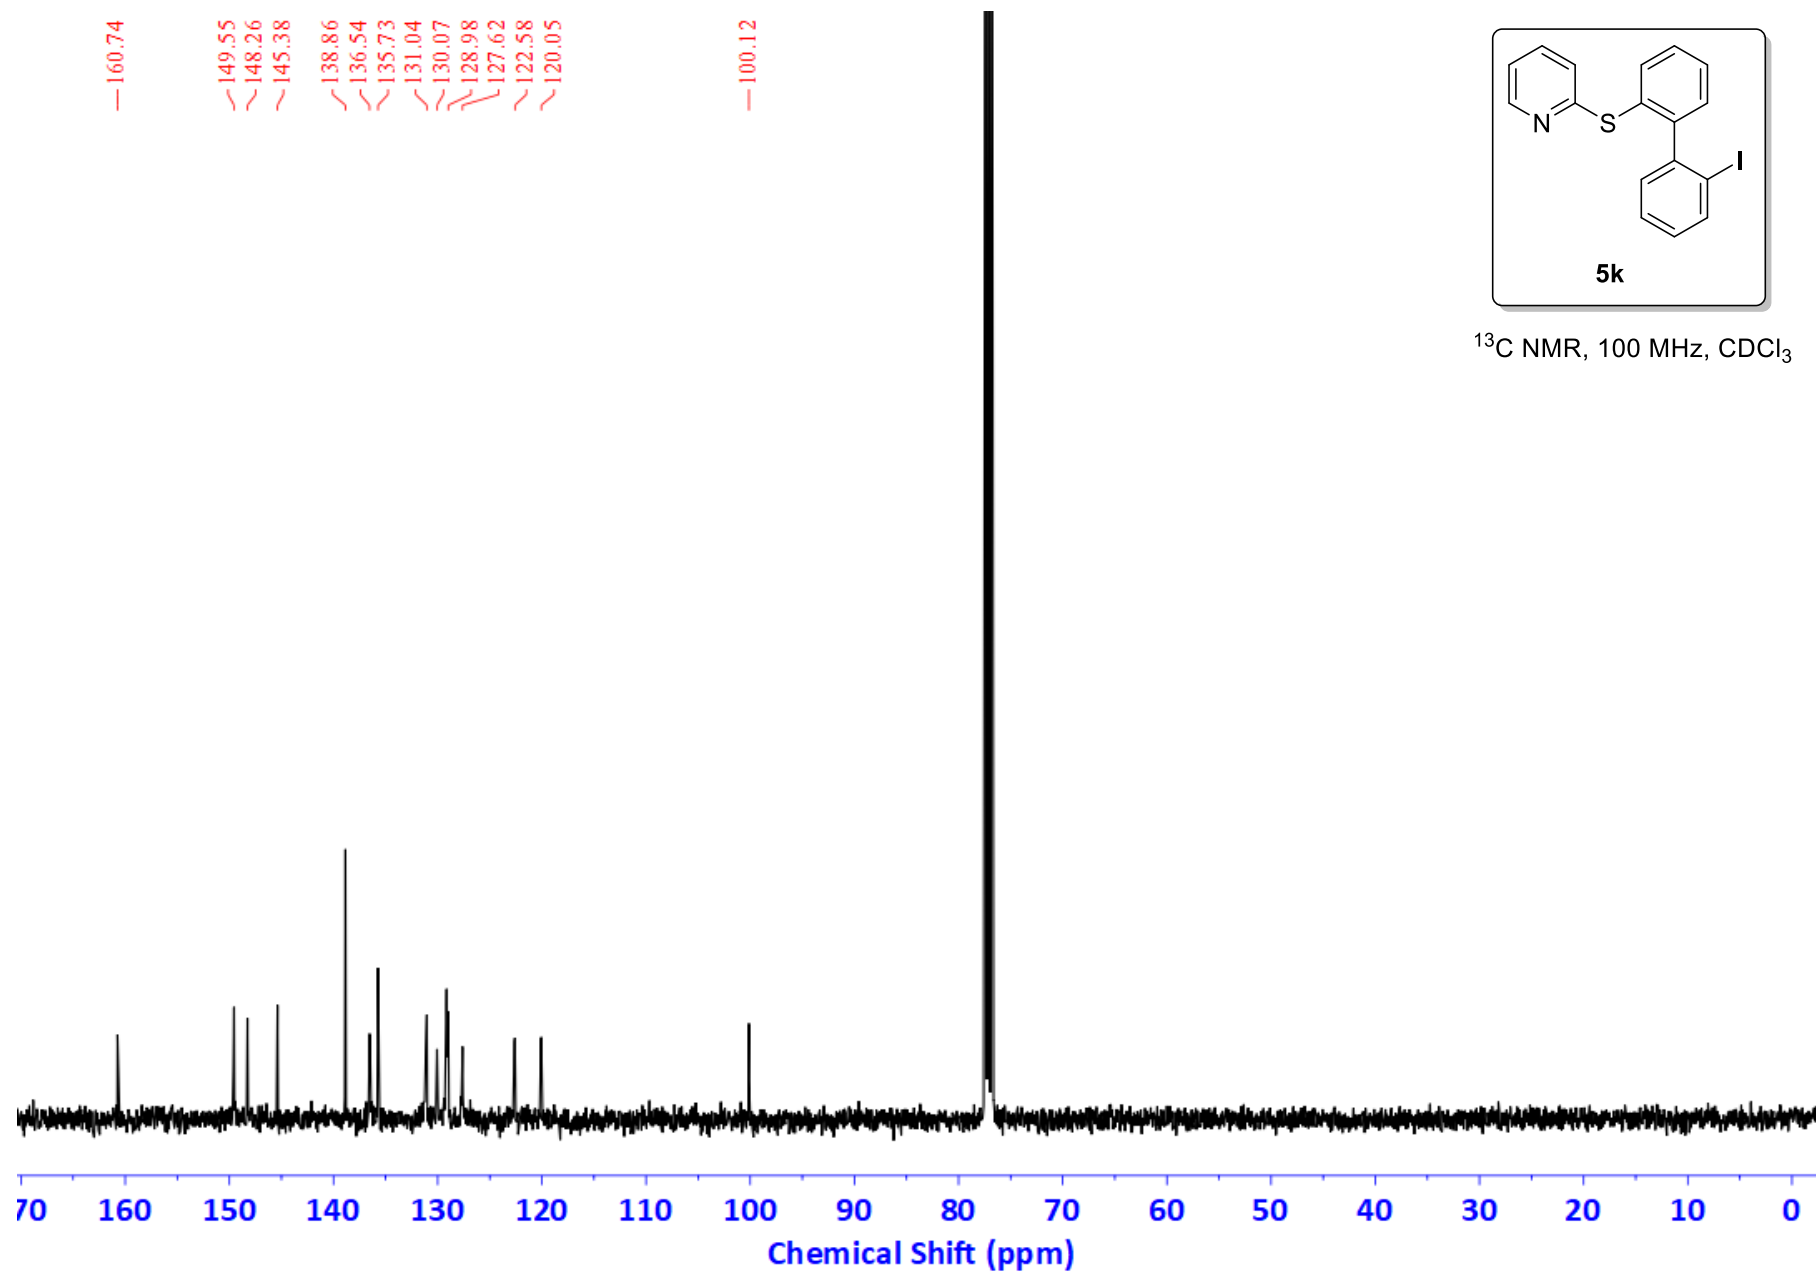

8.45  
8.44  
7.62  
7.62  
7.60  
7.60  
7.59  
7.58  
7.57  
7.56  
7.10  
7.10  
7.09  
7.09  
7.08  
7.08  
7.07

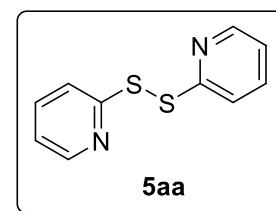

$^1\text{H}$  NMR, 400 MHz,  $\text{CDCl}_3$

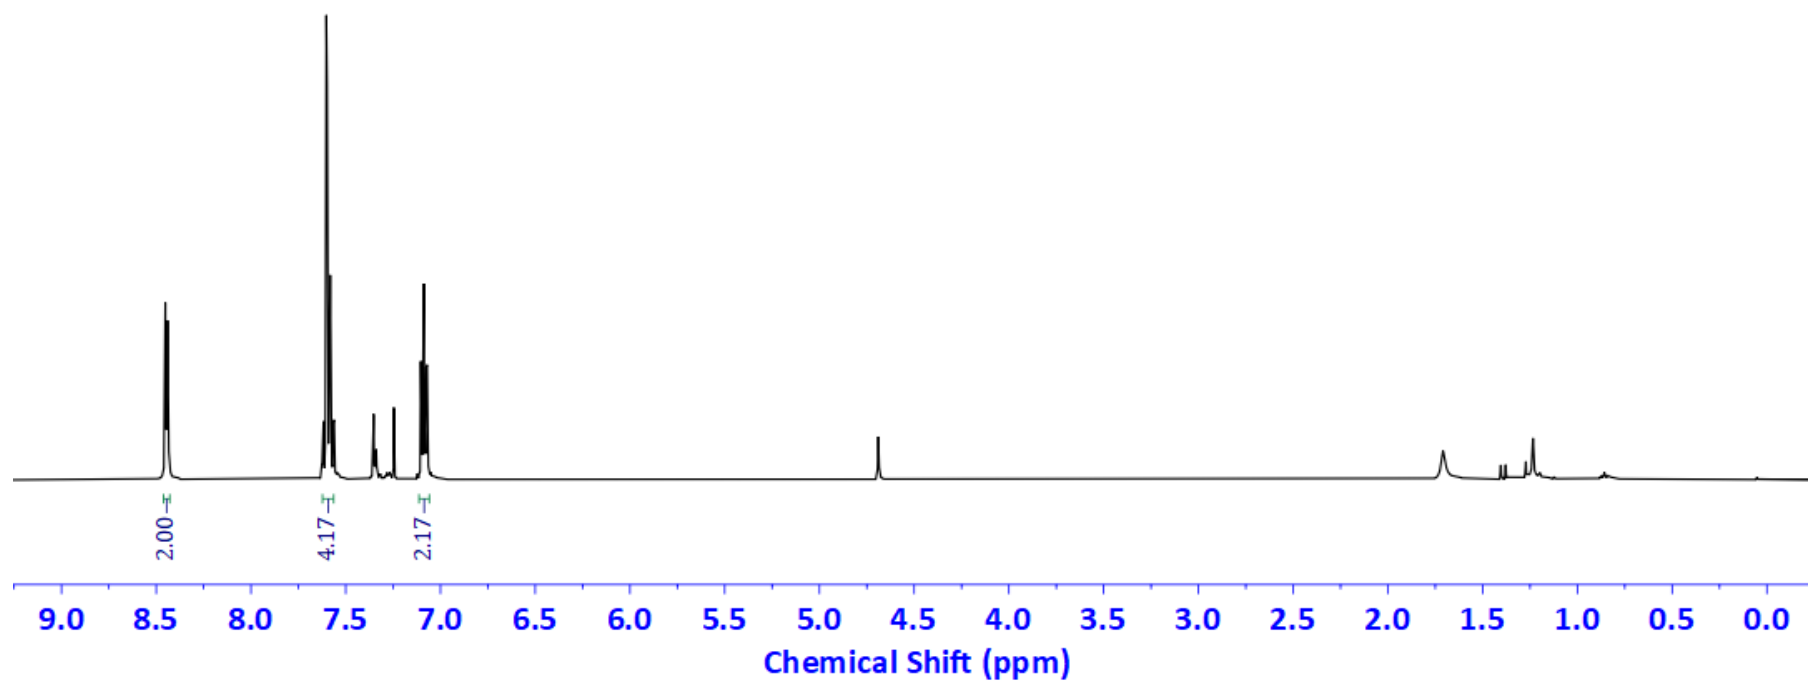

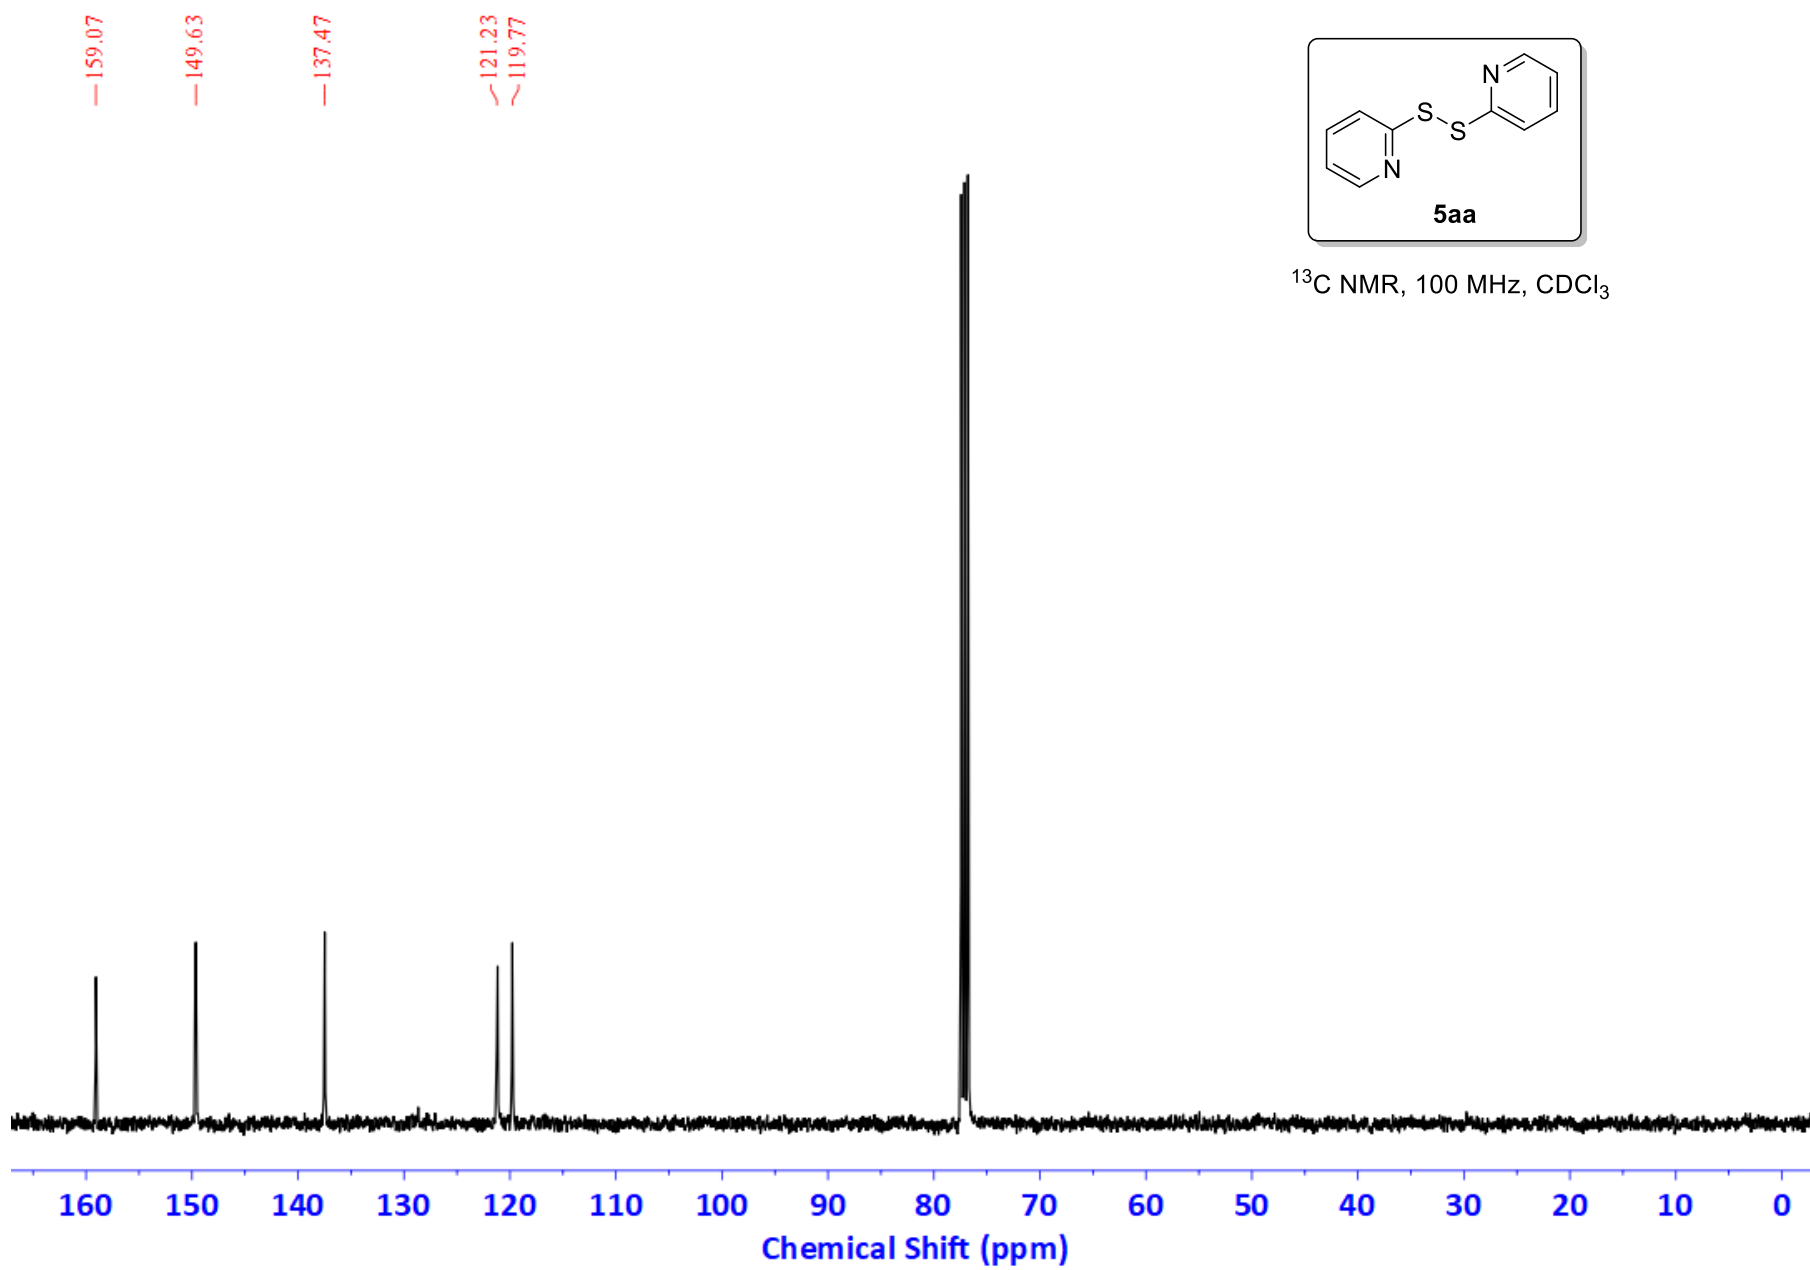

Supplement: d2ob00406b1.pdf [file d2ob00406b1.pdf]
